# Supplementary material for: Synthesis of the 3,3′-bipyrrole scaffold from diyne
Source: Royal Society of Chemistry journal article supplement (doi:10.1039/d4ob02101k), 2025-01-01
Supplement: d4ob02101k1.pdf [file d4ob02101k1.pdf]

# Supporting Information

## Bipyrrole Scaffold Made Easy from Diyne

Wentao Zhang<sup>§</sup>, Luyao Wang<sup>§</sup>, Yufeng Zhou<sup>§</sup>, Zhifang Chen<sup>§</sup>, Heng-Ying Xiong\* and  
Guangwu Zhang\*

College of Chemistry and Chemical Engineering, Henan University, Kaifeng, 475004 (China)  
E-mail: xionghengying@vip.henu.edu.cn, gw.zhangchem@hotmail.com

## Table of contents

|                                                                                  |      |
|----------------------------------------------------------------------------------|------|
| 1. General information. ....                                                     | S2   |
| 2. Materials. ....                                                               | S2   |
| 3. Optimization of Cycloaddition Reaction Conditions. ....                       | S2   |
| 4. General procedure for the synthesis of derivatives <b>3</b> . ....            | S3   |
| 5. Purification and characterization of derivatives <b>3</b> . ....              | S4   |
| 6. Optimization of Dehydrogenation Reaction Conditions. ....                     | S18  |
| 7. General procedure for the synthesis of derivatives <b>4</b> . ....            | S19  |
| 8. Purification and characterization of derivatives <b>4</b> . ....              | S19  |
| 9. procedure for the synthesis of derivative <b>5</b> . ....                     | S27  |
| 10. General procedure for the synthesis of derivatives <b>6</b> . ....           | S28  |
| 11. General procedure for the synthesis of derivatives <b>7, 8, 9</b> . ....     | S29  |
| 12. General procedures for control experiments. ....                             | S31  |
| 13. References. ....                                                             | S33  |
| 14. NMR spectra copies of the compounds <b>3</b> . ....                          | S34  |
| 15. NMR spectra copies of the compounds <b>4</b> . ....                          | S72  |
| 16. NMR spectra copies of the compounds <b>5, 6a, 6b, 7, 8, 9, 10, 11</b> . .... | S93  |
| 17. HRMS copies of the compounds. ....                                           | S102 |

## 1. General information.

All reactions were carried out using oven-dried glassware and magnetic stirring under argon gas unless otherwise stated. Reaction temperatures are reported as the temperature of the bath surrounding the vessel. Analytical thin layer chromatography was performed on silica gel aluminum plates with F-254 indicator and visualized by UV light (254 nm). Column chromatography was performed using 200-300 mesh silica gel. NMR spectra were recorded on AVANCE III HD 400 MHz or Bruker AVANCE III 300 MHz spectrometer. Chemical shifts ( $\delta$ ) are quoted in ppm relative to TMS ( $^1\text{H}$ ) and  $\text{CFCl}_3$  ( $^{19}\text{F}$ ). Coupling constants ( $J$ ) are quoted in Hz. The following abbreviations were used to show the multiplicities: s: singlet, d: doublet, t: triplet, q: quadruplet, m: multiplet. The residual solvent signals were used as references ( $\text{CDCl}_3$ :  $\delta_{\text{H}} = 7.26$  ppm,  $\delta_{\text{C}} = 77.00$  ppm or relative to external  $\text{CFCl}_3$ ,  $\delta_{\text{F}} = 0$  ppm). High-resolution mass spectrometry (HRMS) was carried out on a Waters Xevo G2-XS QTof.

## 2. Materials.

Toluene was distilled over sodium/benzophenone. Anhydrous *o*-xylene, TsOH, and  $\text{Cu}_2\text{O}$  was purchased from Innochem Ltd. Pyridine was purchased from Tianjin DeEn Chemical Reagent Co., Ltd.  $\text{W}(\text{CO})_6$  was purchased from Titan Technology (Shanghai) Co., Ltd. *N*-(methoxymethyl)-*N*-(trimethylsilylmethyl)-benzylamine was purchased from Shanghai Haohong Biomedical Technology Co., Ltd. All the 1,3-diyne **1** were synthesized according to the literature.<sup>[1]</sup>

## 3. Optimization of Cycloaddition Reaction Conditions.<sup>[a]</sup>

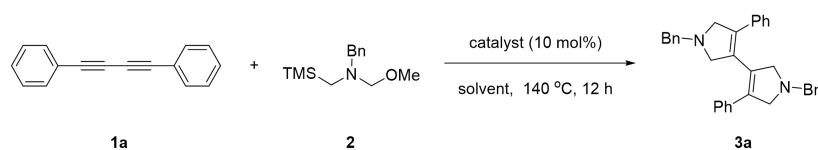

| Entry | Cat. (X mol%)                      | Sol./Temp. (°C)/time (h) | Yield(%) <sup>[b]</sup> |
|-------|------------------------------------|--------------------------|-------------------------|
| 1     | $\text{Fe}_2(\text{CO})_9$ (10)    | <i>o</i> -xylene/140/12  | 33                      |
| 2     | $\text{Re}_2(\text{CO})_{10}$ (10) | <i>o</i> -xylene/140/12  | 40                      |
| 3     | $\text{Ru}(\text{CO})_{12}$ (10)   | <i>o</i> -xylene/140/12  | 26                      |
| 4     | $\text{Co}_2(\text{CO})_8$ (10)    | <i>o</i> -xylene/140/12  | 29                      |
| 5     | $\text{Cr}(\text{CO})_6$ (10)      | <i>o</i> -xylene/140/12  | 26                      |
| 6     | $\text{Mo}(\text{CO})_6$ (10)      | <i>o</i> -xylene/140/12  | 56                      |

|                   |                                         |                         |    |
|-------------------|-----------------------------------------|-------------------------|----|
| 7                 | Mn <sub>2</sub> (CO) <sub>10</sub> (10) | <i>o</i> -xylene/140/12 | 47 |
| 8                 | W(CO) <sub>6</sub> (10)                 | <i>o</i> -xylene/140/12 | 85 |
| 9                 | Cu(OAc) <sub>2</sub> (10)               | <i>o</i> -xylene/140/12 | 19 |
| 10                | Pd(OAc) <sub>2</sub> (10)               | <i>o</i> -xylene/140/12 | 28 |
| 11                | WCl <sub>6</sub> (10)                   | <i>o</i> -xylene/140/12 | 39 |
| 12                | -                                       | <i>o</i> -xylene/140/12 | 7  |
| 14                | W(CO) <sub>6</sub> (10)                 | toluene/140/12          | 68 |
| 15                | W(CO) <sub>6</sub> (10)                 | PhCl/140/12             | 66 |
| 16                | W(CO) <sub>6</sub> (10)                 | 1,4-Dioxane/140/12      | 37 |
| 17                | W(CO) <sub>6</sub> (10)                 | DMF/140/12              | 32 |
| 18                | W(CO) <sub>6</sub> (10)                 | NMP/140/12              | 29 |
| 19                | W(CO) <sub>6</sub> (10)                 | MeCN/140/12             | 36 |
| 20                | W(CO) <sub>6</sub> (10)                 | <i>o</i> -xylene/120/12 | 34 |
| 21                | W(CO) <sub>6</sub> (10)                 | <i>o</i> -xylene/130/12 | 51 |
| 22                | W(CO) <sub>6</sub> (10)                 | <i>o</i> -xylene/150/12 | 80 |
| 23                | W(CO) <sub>6</sub> (10)                 | <i>o</i> -xylene/140/6  | 37 |
| 24                | W(CO) <sub>6</sub> (10)                 | <i>o</i> -xylene/140/24 | 83 |
| 25 <sup>[c]</sup> | W(CO) <sub>6</sub> (10)                 | <i>o</i> -xylene/140/12 | 36 |
| 26 <sup>[d]</sup> | W(CO) <sub>6</sub> (10)                 | <i>o</i> -xylene/140/12 | 78 |

Reaction conditions: [a]1,3-diyne **1a** (0.2 mmol, 1.0 equiv.), *N*-(methoxymethyl)-*N*-(trimethylsilylmethyl)-benzylamine **2** (1.2 mmol, 6.0 equiv.), indicated catalyst (0.02 mmol, 10 mol%), in indicated solvent (2 mL), under Ar, at indicated temperature for 12 h. [b]Isolated yield. [c]1,3-diyne **1a** (0.2 mmol, 1.0 equiv.), *N*-(methoxymethyl)-*N*-(trimethylsilylmethyl)-benzylamine **2** (1.2 mmol, 2.0 equiv.), indicated catalyst (0.02 mmol, 10 mol%), in indicated solvent (2 mL), under Ar, at indicated temperature for 12 h. [d]1,3-diyne **1a** (0.2 mmol, 1.0 equiv.), *N*-(methoxymethyl)-*N*-(trimethylsilylmethyl)-benzylamine **2** (1.2 mmol, 5.0 equiv.), indicated catalyst (0.02 mmol, 10 mol%), in indicated solvent (2 mL), under Ar, at indicated temperature for 12 h.

#### 4. General procedure for the synthesis of derivatives 3.

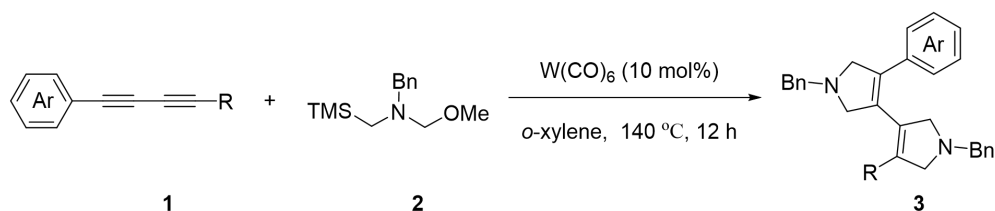

An oven-dried 25 mL schlenk tube equipped with a stirring bar was transferred into glovebox (through standard glovebox operation), where W(CO)<sub>6</sub> (0.02 mmol, 7.0 mg, 0.1 equiv.) was added. The tube was then removed from glovebox and placed under Ar. Then 1,3-diyne **1** (0.2 mmol, 1.0 equiv.), *N*-(methoxymethyl)-*N*-(trimethylsilylmethyl)-benzylamine **2** (1.2 mmol, 6.0 equiv.),



and *o*-xylene (2 mL) were added subsequently to the test tube under Ar. The resulting reaction mixture was stirred at 140 °C for 12 h. After reaction completed, the mixture was cooled down to room temperature, and the volatiles were removed under reduced pressure. The residue was then purified by flash column chromatography on silica gel to give the desired product **3**.

## 5. Purification and characterization of derivatives **3**.

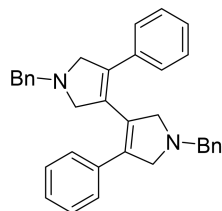

**3a**

**1,1'-dibenzyl-4,4'-diphenyl-2,2',5,5'-tetrahydro-1H,1'H-3,3'-bipyrrole 3a.** The product was purified by flash column chromatography on silica gel (height 23 cm, width 1.7 cm, eluent: petroleum ether/ethyl acetate, gradient: 20:1 to 5:1) as a yellow oil (85%, 79.6 mg).  $R_f$  (petroleum ether/ethyl acetate = 5:1): 0.44.  $^1\text{H NMR}$  (400 MHz,  $\text{CDCl}_3$ )  $\delta$  7.39 – 7.18 (m, 20H), 3.95 – 3.84 (m, 4H), 3.84 – 3.73 (m, 4H), 3.65 – 3.52 (m, 4H).  $^{13}\text{C NMR}$  (101 MHz,  $\text{CDCl}_3$ )  $\delta$  139.23, 136.04, 135.18, 130.55, 128.68, 128.38, 128.27, 127.38, 127.03, 126.94, 62.90, 62.81, 60.40. **HRMS** (ESI) calcd for  $\text{C}_{34}\text{H}_{33}\text{N}_2^+$   $m/z$  469.2644  $[\text{M}+\text{H}]^+$ , Found 469.2647.

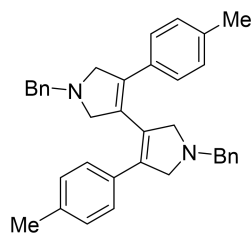

**3b**

**1,1'-dibenzyl-4,4'-di-p-tolyl-2,2',5,5'-tetrahydro-1H,1'H-3,3'-bipyrrole 3b.** The product was purified by flash column chromatography on silica gel (height 23 cm, width 1.7 cm, eluent: petroleum ether/ethyl acetate, gradient: 20:1 to 5:1) as a yellow oil (85%, 84.4 mg).  $R_f$  (petroleum ether/ethyl acetate = 5:1): 0.41.  $^1\text{H NMR}$  (400 MHz,  $\text{CDCl}_3$ )  $\delta$  7.34 – 7.18 (m, 14H), 7.11 – 7.03 (m, 4H), 3.92 – 3.83 (m, 4H), 3.82 – 3.73 (m, 4H), 3.62 – 3.49 (m, 4H), 2.31 (s, 6H).  $^{13}\text{C NMR}$  (101 MHz,  $\text{CDCl}_3$ )  $\delta$  139.33, 137.16, 135.70, 132.35, 129.94, 129.02, 128.72, 128.37, 127.02, 126.88, 62.90, 62.78, 60.46, 21.34. **HRMS** (ESI) calcd for  $\text{C}_{36}\text{H}_{37}\text{N}_2^+$   $m/z$  497.2951  $[\text{M}+\text{H}]^+$ , Found 497.2946.

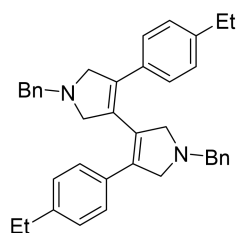

**3c**

**1,1'-dibenzyl-4,4'-bis(4-ethylphenyl)-2,2',5,5'-tetrahydro-1H,1'H-3,3'-bipyrrole**

**3c.** The product was purified by flash column chromatography on silica gel (height 23 cm, width 1.7 cm, eluent: petroleum ether/ethyl acetate, gradient: 20:1 to 5:1) as a white solid (75%, 78.6 mg), mp 105.8-107.1 °C.  $R_f$  (petroleum ether/ethyl acetate = 5:1): 0.45.  $^1\text{H NMR}$  (400 MHz,  $\text{CDCl}_3$ )  $\delta$  7.31 – 7.26 (m, 2H), 7.25 – 7.20 (m, 8H), 7.20 – 7.11 (m, 4H), 7.03 (d,  $J$  = 7.6 Hz, 4H), 3.84 (t,  $J$  = 3.8 Hz, 4H), 3.73 (s, 4H), 3.52 (t,  $J$  = 3.8 Hz, 4H), 2.55 (q,  $J$  = 7.6 Hz, 4H), 1.16 (t,  $J$  = 7.6 Hz, 6H).  $^{13}\text{C NMR}$  (101 MHz,  $\text{CDCl}_3$ )  $\delta$  143.46, 139.36, 135.63, 132.57, 129.95, 128.70, 128.35, 127.78, 126.99, 126.92, 62.93, 62.77, 60.47, 28.68, 15.57. **HRMS** (ESI) calcd for  $\text{C}_{38}\text{H}_{41}\text{N}_2^+$   $m/z$  525.3264  $[\text{M}+\text{H}]^+$ , Found 525.3270.

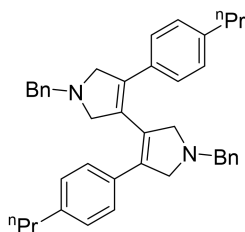

**3d**

**1,1'-dibenzyl-4,4'-bis(4-propylphenyl)-2,2',5,5'-tetrahydro-1H,1'H-3,3'-bipyrrole**

**3d.** The product was purified by flash column chromatography on silica gel (height 23 cm, width 1.7 cm, eluent: petroleum ether/ethyl acetate, gradient: 20:1 to 5:1) as a yellow oil (82%, 90.7 mg).  $R_f$  (petroleum ether/ethyl acetate = 5:1): 0.47.  $^1\text{H NMR}$  (400 MHz,  $\text{CDCl}_3$ )  $\delta$  7.29 – 7.24 (m, 4H), 7.23 – 7.17 (m, 8H), 7.17 – 7.10 (m, 2H), 7.03 – 6.96 (m, 4H), 3.83 (t,  $J$  = 3.6 Hz, 4H), 3.71 (s, 4H), 3.52 (t,  $J$  = 4.0 Hz, 4H), 2.47 (t,  $J$  = 6.8 Hz, 4H), 1.62 – 1.48 (m, 4H), 0.86 (t,  $J$  = 7.2 Hz, 6H).  $^{13}\text{C NMR}$  (101 MHz,  $\text{CDCl}_3$ )  $\delta$  141.92, 139.41, 135.72, 132.65, 129.98, 128.72, 128.41, 128.39, 127.02, 126.87, 63.00, 62.82, 60.51, 37.90, 24.54, 13.96. **HRMS** (ESI) calcd for  $\text{C}_{40}\text{H}_{45}\text{N}_2^+$   $m/z$  553.3577  $[\text{M}+\text{H}]^+$ , Found 553.3567.

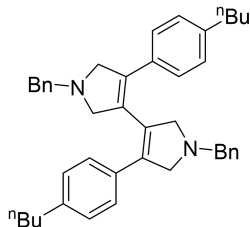

**3e**

**1,1'-dibenzyl-4,4'-bis(4-butylphenyl)-2,2',5,5'-tetrahydro-1H,1'H-3,3'-bipyrrole**

**3e.** The product was purified by flash column chromatography on silica gel (height 23 cm, width 1.7 cm, eluent: petroleum ether/ethyl acetate, gradient: 20:1 to 5:1) as a

yellow oil (69%, 80.2 mg).  $R_f$  (petroleum ether/ethyl acetate = 5:1): 0.37.  **$^1\text{H}$  NMR** (400 MHz,  $\text{CDCl}_3$ )  $\delta$  7.33 – 7.21 (m, 14H), 7.07 (d,  $J$  = 7.6 Hz, 4H), 3.89 (t,  $J$  = 4.0 Hz, 4H), 3.78 (s, 4H), 3.57 (t,  $J$  = 3.6 Hz, 4H), 2.56 (t,  $J$  = 7.6 Hz, 4H), 1.61 – 1.52 (m, 4H), 1.39 – 1.28 (m, 4H), 0.92 (t,  $J$  = 7.2 Hz, 6H).  **$^{13}\text{C}$  NMR** (101 MHz,  $\text{CDCl}_3$ )  $\delta$  142.10, 139.32, 135.61, 132.50, 129.86, 128.66, 128.32, 128.27, 126.95, 126.80, 62.90, 62.73, 60.45, 35.43, 33.57, 22.39, 14.02. **HRMS** (ESI) calcd for  $\text{C}_{42}\text{H}_{48}\text{N}_2\text{Na}^+$   $m/z$  603.3710  $[\text{M}+\text{Na}]^+$ , Found 603.3718.

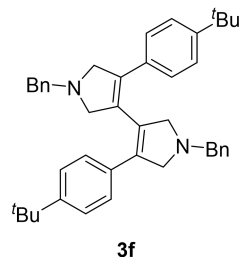

**1,1'-dibenzyl-4,4'-bis(4-(tert-butyl)phenyl)-2,2',5,5'-tetrahydro-1H,1'H-3,3'-bipyrrrole 3f.** The product was purified by flash column chromatography on silica gel (height 23 cm, width 1.7 cm, eluent: petroleum ether/ethyl acetate, gradient: 20:1 to 5:1) as a white solid (69%, 80.2 mg), mp 186.2-187.1 °C.  $R_f$  (petroleum ether/ethyl acetate = 5:1): 0.41.  **$^1\text{H}$  NMR** (400 MHz,  $\text{CDCl}_3$ )  $\delta$  7.34 – 7.26 (m, 12H), 7.25 – 7.19 (m, 6H), 3.90 (t,  $J$  = 4.0 Hz, 4H), 3.79 (s, 4H), 3.58 (t,  $J$  = 3.6 Hz, 4H), 1.29 (s, 18H).  **$^{13}\text{C}$  NMR** (101 MHz,  $\text{CDCl}_3$ )  $\delta$  150.16, 139.33, 135.36, 132.22, 129.99, 128.65, 128.31, 126.94, 126.55, 125.10, 62.90, 62.70, 60.45, 34.56, 31.30. **HRMS** (ESI) calcd for  $\text{C}_{42}\text{H}_{49}\text{N}_2^+$   $m/z$  581.3890  $[\text{M}+\text{H}]^+$ , Found 581.3880.

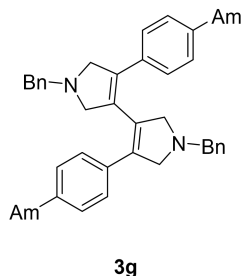

**1,1'-dibenzyl-4,4'-bis(4-pentylphenyl)-2,2',5,5'-tetrahydro-1H,1'H-3,3'-bipyrrrole 3g.** The product was purified by flash column chromatography on silica gel (height 23 cm, width 1.7 cm, eluent: petroleum ether/ethyl acetate, gradient: 20:1 to 5:1) as a yellow oil (80%, 97.4 mg).  $R_f$  (petroleum ether/ethyl acetate = 5:1): 0.52.  **$^1\text{H}$  NMR** (400 MHz,  $\text{CDCl}_3$ )  $\delta$  7.34 – 7.26 (m, 10H), 7.25 – 7.21 (m, 4H), 7.07 (d,  $J$  = 6.4 Hz, 4H), 3.89 (t,  $J$  = 4.0 Hz, 4H), 3.79 (s, 4H), 3.58 (t,  $J$  = 4.0 Hz, 4H), 2.56 (t,  $J$  = 8.0 Hz, 4H), 1.61 – 1.55 (m, 4H), 1.37 – 1.27 (m, 8H), 0.89 (t,  $J$  = 6.8 Hz, 6H).  **$^{13}\text{C}$  NMR** (101 MHz,  $\text{CDCl}_3$ )  $\delta$  142.19, 139.23, 135.62, 132.45, 129.79, 128.68, 128.33, 128.28, 126.98, 126.80, 62.86, 62.69, 60.43, 35.72, 31.55, 31.12, 22.59, 14.09. **HRMS** (ESI) calcd for  $\text{C}_{44}\text{H}_{53}\text{N}_2^+$   $m/z$  609.4203  $[\text{M}+\text{H}]^+$ , Found 609.4198.

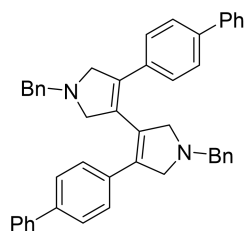

3h

**4,4'-di([1,1'-biphenyl]-4-yl)-1,1'-dibenzyl-2,2',5,5'-tetrahydro-1H,1'H-3,3'-bipyrrole 3h.** The product was purified by flash column chromatography on silica gel (height 23 cm, width 1.7 cm, eluent: petroleum ether/ethyl acetate, gradient: 20:1 to 5:1) as a yellow oil (75%, 93.0 mg).  $R_f$  (petroleum ether/ethyl acetate = 5:1): 0.32.  $^1\text{H}$  NMR (400 MHz,  $\text{CDCl}_3$ )  $\delta$  7.55 (d,  $J$  = 7.2 Hz, 4H), 7.49 (d,  $J$  = 8.4 Hz, 4H), 7.46 – 7.37 (m, 8H), 7.37 – 7.24 (m, 10H), 7.24 – 7.16 (m, 2H), 3.94 (t,  $J$  = 3.6 Hz, 4H), 3.81 (s, 4H), 3.65 (t,  $J$  = 3.6 Hz, 4H).  $^{13}\text{C}$  NMR (101 MHz,  $\text{CDCl}_3$ )  $\delta$  140.71, 140.03, 139.21, 135.64, 134.14, 130.82, 128.85, 128.72, 128.43, 127.36, 127.09, 126.99, 126.94, 62.90, 62.86, 60.44, one carbon was overlapped. HRMS (ESI) calcd for  $\text{C}_{46}\text{H}_{41}\text{N}_2^+$   $m/z$  621.3270  $[\text{M}+\text{H}]^+$ , Found 621.3275.

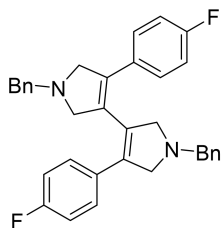

3i

**1,1'-dibenzyl-4,4'-bis(4-fluorophenyl)-2,2',5,5'-tetrahydro-1H,1'H-3,3'-bipyrrole 3i.** The product was purified by flash column chromatography on silica gel (height 23 cm, width 1.7 cm, eluent: petroleum ether/ethyl acetate, gradient: 20:1 to 5:1) as a white solid (81%, 81.7 mg), mp 155.7-157.3 °C.  $R_f$  (petroleum ether/ethyl acetate = 5:1): 0.46.  $^1\text{H}$  NMR (400 MHz,  $\text{CDCl}_3$ )  $\delta$  7.34 – 7.29 (m, 7H), 7.27 – 7.19 (m, 7H), 6.98 – 6.86 (m, 4H), 3.83 (t,  $J$  = 4.0 Hz, 4H), 3.79 (s, 4H), 3.56 (t,  $J$  = 3.6 Hz, 4H).  $^{19}\text{F}$  NMR (376 MHz,  $\text{CDCl}_3$ )  $\delta$  -113.99 (s).  $^{13}\text{C}$  NMR (101 MHz,  $\text{CDCl}_3$ )  $\delta$  162.00 (d,  $J$  = 248.3 Hz), 139.00, 135.22, 131.20 (d,  $J$  = 3.3 Hz), 129.93, 128.50 (d,  $J$  = 8.0 Hz), 128.52 (d,  $J$  = 23.7 Hz), 127.11, 127.00, 115.15 (d,  $J$  = 21.5 Hz), 62.86, 62.68, 60.28. HRMS (ESI) calcd for  $\text{C}_{34}\text{H}_{31}\text{F}_2\text{N}_2^+$   $m/z$  505.2450  $[\text{M}+\text{H}]^+$ , Found 505.2446.

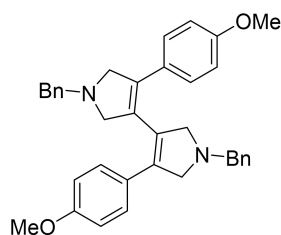

3j

**1,1'-dibenzyl-4,4'-bis(4-methoxyphenyl)-2,2',5,5'-tetrahydro-1H,1'H-3,3'-bipyrro**

**le 3j.** The product was purified by flash column chromatography on silica gel (height 23 cm, width 1.7 cm, eluent: petroleum ether/ethyl acetate, gradient: 10:1 to 2:1) as a yellow oil (79%, 83.5 mg).  $R_f$  (petroleum ether/ethyl acetate = 2:1): 0.53.  $^1\text{H NMR}$  (400 MHz,  $\text{CDCl}_3$ )  $\delta$  7.33 – 7.24 (m, 12H), 7.22 – 7.17 (m, 2H), 6.84 – 6.74 (m, 4H), 3.86 (t,  $J$  = 4.0 Hz, 4H), 3.77 (s, 4H), 3.74 (s, 6H), 3.55 (t,  $J$  = 3.6 Hz, 4H).  $^{13}\text{C NMR}$  (75 MHz,  $\text{CDCl}_3$ )  $\delta$  158.91, 139.30, 135.19, 128.88, 128.73, 128.39, 128.19, 127.87, 127.05, 113.73, 62.90, 62.76, 60.46, 55.27. **HRMS** (ESI) calcd for  $\text{C}_{36}\text{H}_{37}\text{N}_2\text{O}_2^+$   $m/z$  529.2850  $[\text{M}+\text{H}]^+$ , Found 529.2840.

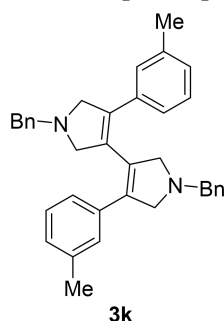

**1,1'-dibenzyl-4,4'-di-m-tolyl-2,2',5,5'-tetrahydro-1H,1'H-3,3'-bipyrrole 3k.** The product was purified by flash column chromatography on silica gel (height 23 cm, width 1.7 cm, eluent: petroleum ether/ethyl acetate, gradient: 20:1 to 5:1) as a yellow oil (83%, 82.4 mg).  $R_f$  (petroleum ether/ethyl acetate = 5:1): 0.46.  $^1\text{H NMR}$  (400 MHz,  $\text{CDCl}_3$ )  $\delta$  7.36 – 7.26 (m, 8H), 7.24 – 7.20 (m, 2H), 7.19 – 7.12 (m, 4H), 7.10 (s, 2H), 7.04 – 6.98 (m, 2H), 3.87 (t,  $J$  = 3.6 Hz, 4H), 3.77 (s, 4H), 3.57 (t,  $J$  = 3.6 Hz, 4H), 2.29 (s, 6H).  $^{13}\text{C NMR}$  (75 MHz,  $\text{CDCl}_3$ )  $\delta$  139.39, 137.63, 136.01, 135.22, 130.50, 128.63, 128.35, 128.14, 128.07, 127.59, 126.97, 124.18, 62.95, 62.82, 60.44, 21.54. **HRMS** (ESI) calcd for  $\text{C}_{36}\text{H}_{37}\text{N}_2^+$   $m/z$  497.2951  $[\text{M}+\text{H}]^+$ , Found 497.2945.

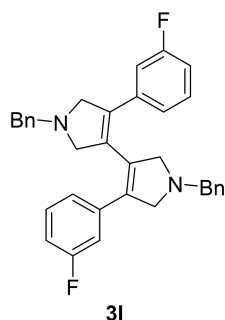

**1,1'-dibenzyl-4,4'-bis(3-fluorophenyl)-2,2',5,5'-tetrahydro-1H,1'H-3,3'-bipyrrole 3l.** The product was purified by flash column chromatography on silica gel (height 23 cm, width 1.7 cm, eluent: petroleum ether/ethyl acetate, gradient: 20:1 to 5:1) as a white solid (75%, 75.8 mg), mp 109.2–112.5 °C.  $R_f$  (petroleum ether/ethyl acetate = 5:1): 0.47.  $^1\text{H NMR}$  (400 MHz,  $\text{CDCl}_3$ )  $\delta$  7.31 – 7.19 (m, 8H), 7.17 – 7.12 (m, 2H), 7.12 – 7.04 (m, 2H), 6.96 (dt,  $J$  = 8.0, 1.2 Hz, 2H), 6.89 (dt,  $J$  = 9.2, 2.4 Hz, 2H), 6.79 (td,  $J$  = 8.4, 2.4 Hz, 2H), 3.77 (t,  $J$  = 3.6 Hz, 4H), 3.72 (s, 4H), 3.53 (t,  $J$  = 4.0 Hz, 4H).  $^{19}\text{F NMR}$  (376 MHz,  $\text{CDCl}_3$ )  $\delta$  -113.27 (s).  $^{13}\text{C NMR}$  (101 MHz,  $\text{CDCl}_3$ )  $\delta$  162.57 (d,  $J$  = 246.2 Hz), 138.89, 137.01 (d,  $J$  = 7.8 Hz), 135.19 (d,  $J$  = 2.5 Hz), 131.19, 129.61 (d,  $J$  = 8.5 Hz), 128.51, 128.33, 127.04, 122.46 (d,  $J$  = 2.8 Hz), 114.15 (d,  $J$  = 21.3

Hz), 113.46 (d,  $J = 22.1$  Hz), 62.66, 62.59, 60.10. **HRMS** (ESI) calcd for  $C_{34}H_{31}F_2N_2^+$   $m/z$  505.2450  $[M+H]^+$ , Found 505.2441.

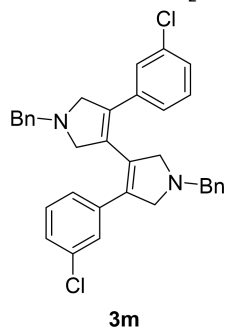

**1,1'-dibenzyl-4,4'-bis(3-chlorophenyl)-2,2',5,5'-tetrahydro-1H,1'H-3,3'-bipyrrole 3m.** The product was purified by flash column chromatography on silica gel (height 23 cm, width 1.7 cm, eluent: petroleum ether/ethyl acetate, gradient: 20:1 to 5:1) as a colorless oil (82%, 88.1 mg).  $R_f$  (petroleum ether/ethyl acetate = 5:1): 0.49.  **$^1H$  NMR** (400 MHz,  $CDCl_3$ )  $\delta$  7.38 – 7.28 (m, 8H), 7.26 – 7.21 (m, 2H), 7.19 – 7.10 (m, 8H), 3.88 – 3.76 (m, 8H), 3.61 (td,  $J = 4.0, 1.2$  Hz, 4H).  **$^{13}C$  NMR** (101 MHz,  $CDCl_3$ )  $\delta$  139.01, 136.83, 135.30, 134.07, 131.22, 129.42, 128.59, 128.42, 127.34, 127.12, 126.74, 125.00, 62.80, 62.67, 60.25. **HRMS** (ESI) calcd for  $C_{34}H_{31}Cl_2N_2^+$   $m/z$  537.1859  $[M+H]^+$ , Found 537.1864.

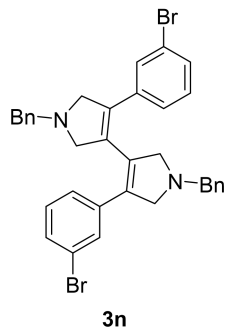

**1,1'-dibenzyl-4,4'-bis(3-bromophenyl)-2,2',5,5'-tetrahydro-1H,1'H-3,3'-bipyrrole 3n.** The product was purified by flash column chromatography on silica gel (height 23 cm, width 1.7 cm, eluent: petroleum ether/ethyl acetate, gradient: 20:1 to 5:1) as a colorless oil (78%, 97.5 mg).  $R_f$  (petroleum ether/ethyl acetate = 5:1): 0.44.  **$^1H$  NMR** (400 MHz,  $CDCl_3$ )  $\delta$  7.36 – 7.23 (m, 14H), 7.15 (d,  $J = 8.0$  Hz, 2H), 7.07 (t,  $J = 8.0$  Hz, 2H), 3.85 – 3.75 (m, 8H), 3.61 (t,  $J = 4.0$  Hz, 4H).  **$^{13}C$  NMR** (101 MHz,  $CDCl_3$ )  $\delta$  139.02, 137.13, 135.26, 131.20, 130.26, 129.70, 129.64, 128.62, 128.44, 127.15, 125.46, 122.34, 62.85, 62.67, 60.28. **HRMS** (ESI) calcd for  $C_{34}H_{31}Br_2N_2^+$   $m/z$  625.0849  $[M+H]^+$ , Found 625.0842.

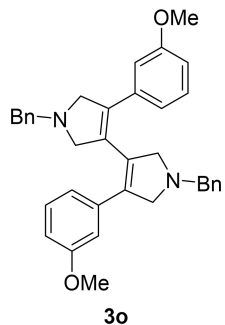

**1,1'-dibenzyl-4,4'-bis(3-methoxyphenyl)-2,2',5,5'-tetrahydro-1H,1'H-3,3'-bipyrrole 3o.** The product was purified by flash column chromatography on silica gel (height 23 cm, width 1.7 cm, eluent: petroleum ether/ethyl acetate, gradient: 20:1 to 2:1) as a white solid (65%, 68.8 mg), mp 142.3-143.8 °C.  $R_f$  (petroleum ether/ethyl acetate = 2:1): 0.35.  $^1\text{H NMR}$  (400 MHz,  $\text{CDCl}_3$ )  $\delta$  7.35 – 7.26 (m, 8H), 7.25 – 7.14 (m, 4H), 7.00 – 6.86 (m, 4H), 6.76 (dd,  $J$  = 9.2, 3.2 Hz, 2H), 3.88 (t,  $J$  = 3.6 Hz, 4H), 3.79 (s, 4H), 3.74 (s, 6H), 3.62 (t,  $J$  = 4 Hz, 4H).  $^{13}\text{C NMR}$  (101 MHz,  $\text{CDCl}_3$ )  $\delta$  159.39, 139.22, 136.31, 135.61, 131.02, 129.22, 128.61, 128.34, 127.00, 119.32, 113.47, 111.80, 62.80, 62.70, 60.33, 55.20. **HRMS** (ESI) calcd for  $\text{C}_{36}\text{H}_{37}\text{N}_2\text{O}_2^+$   $m/z$  529.2850  $[\text{M}+\text{H}]^+$ , Found 529.2857.

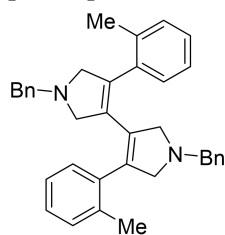

**3p**

**1,1'-dibenzyl-4,4'-di-o-tolyl-2,2',5,5'-tetrahydro-1H,1'H-3,3'-bipyrrole 3p.** The product was purified by flash column chromatography on silica gel (height 23 cm, width 1.7 cm, eluent: petroleum ether/ethyl acetate, gradient: 20:1 to 5:1) as a yellow oil (77%, 76.6 mg).  $R_f$  (petroleum ether/ethyl acetate = 5:1): 0.43.  $^1\text{H NMR}$  (400 MHz,  $\text{CDCl}_3$ )  $\delta$  7.19 – 7.12 (m, 5H), 7.12 – 7.07 (m, 6H), 7.07 – 6.93 (m, 7H), 3.51 (s, 4H), 3.47 (t,  $J$  = 3.2 Hz, 4H), 3.11 (t,  $J$  = 3.6 Hz, 4H), 2.15 (s, 6H).  $^{13}\text{C NMR}$  (101 MHz,  $\text{CDCl}_3$ )  $\delta$  138.99, 137.74, 136.43, 136.00, 130.47, 129.75, 128.88, 128.85, 128.26, 127.57, 126.93, 125.41, 64.81, 62.36, 60.45, 19.84. **HRMS** (ESI) calcd for  $\text{C}_{36}\text{H}_{37}\text{N}_2^+$   $m/z$  497.2951  $[\text{M}+\text{H}]^+$ , Found 497.2942.

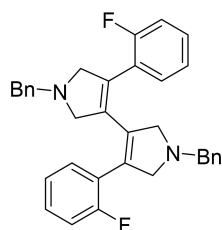

**3q**

**1,1'-dibenzyl-4,4'-bis(2-fluorophenyl)-2,2',5,5'-tetrahydro-1H,1'H-3,3'-bipyrrole 3q.** The product was purified by flash column chromatography on silica gel (height 23 cm, width 1.7 cm, eluent: petroleum ether/ethyl acetate, gradient: 20:1 to 5:1) as a white solid (67%, 67.7 mg), mp 146.2-147.7 °C.  $R_f$  (petroleum ether/ethyl acetate = 5:1): 0.41.  $^1\text{H NMR}$  (400 MHz,  $\text{CDCl}_3$ )  $\delta$  7.26 – 7.18 (m, 8H), 7.17 – 7.13 (m, 2H), 7.05 – 6.96 (m, 4H), 6.85 (td,  $J$  = 7.6, 1.2 Hz, 2H), 6.78 – 6.69 (m, 2H), 3.68 (s, 4H), 3.65 (t,  $J$  = 4.0 Hz, 4H), 3.48 (t,  $J$  = 3.9 Hz, 4H).  $^{19}\text{F NMR}$  (376 MHz,  $\text{CDCl}_3$ )  $\delta$  -112.69 (s).  $^{13}\text{C NMR}$  (101 MHz,  $\text{CDCl}_3$ )  $\delta$  159.64 (d,  $J$  = 249.1 Hz), 139.13, 132.45, 132.08, 129.98 (d,  $J$  = 4.3 Hz), 128.90 (d,  $J$  = 8.2 Hz), 128.78, 128.38, 127.06, 123.71,

123.68, 123.56, 115.42 (d,  $J = 22.3$  Hz), 63.56 (d,  $J = 3.5$  Hz), 62.33, 60.43. **HRMS** (ESI) calcd for  $C_{34}H_{31}F_2N_2^+$   $m/z$  505.2450  $[M+H]^+$ , Found 505.2447.

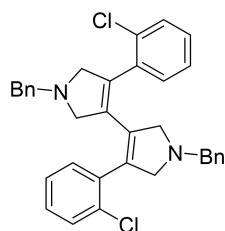

**3r**

**1,1'-dibenzyl-4,4'-bis(2-chlorophenyl)-2,2',5,5'-tetrahydro-1H,1'H-3,3'-bipyrrole 3r.** The product was purified by flash column chromatography on silica gel (height 23 cm, width 1.7 cm, eluent: petroleum ether/ethyl acetate, gradient: 20:1 to 5:1) as a colorless oil (65%, 69.8 mg).  $R_f$  (petroleum ether/ethyl acetate = 5:1): 0.47.  **$^1H$  NMR** (400 MHz,  $CDCl_3$ )  $\delta$  7.23 – 7.12 (m, 13H), 7.09 (d,  $J = 2.4$  Hz, 1H), 7.07 (d,  $J = 2.4$  Hz, 1H), 7.05 (d,  $J = 1.6$  Hz, 1H), 7.02 (d,  $J = 2.4$  Hz, 2H), 3.63 – 3.53 (m, 8H), 3.25 (t,  $J = 3.2$  Hz, 4H).  **$^{13}C$  NMR** (101 MHz,  $CDCl_3$ )  $\delta$  138.82, 135.78, 135.49, 133.11, 131.61, 130.59, 129.35, 128.83, 128.79, 128.26, 126.98, 126.41, 63.93, 62.15, 60.41. **HRMS** (ESI) calcd for  $C_{34}H_{31}Cl_2N_2^+$   $m/z$  537.1859  $[M+H]^+$ , Found 537.1868.

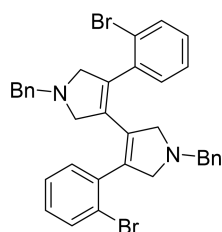

**3s**

**1,1'-dibenzyl-4,4'-bis(2-bromophenyl)-2,2',5,5'-tetrahydro-1H,1'H-3,3'-bipyrrole 3s.** The product was purified by flash column chromatography on silica gel (height 23 cm, width 1.7 cm, eluent: petroleum ether/ethyl acetate, gradient: 20:1 to 5:1) as a white solid (62%, 77.8 mg), mp 112.2–113.5 °C  $R_f$  (petroleum ether/ethyl acetate = 5:1): 0.38.  **$^1H$  NMR** (400 MHz,  $CDCl_3$ )  $\delta$  7.37 – 7.24 (m, 14H), 7.15 (d,  $J = 8.0$  Hz, 2H), 7.07 (t,  $J = 8.0$  Hz, 2H), 3.81 (m, 8H), 3.61 (t,  $J = 4.0$  Hz, 4H).  **$^{13}C$  NMR** (101 MHz,  $CDCl_3$ )  $\delta$  139.02, 137.13, 135.26, 131.20, 130.26, 129.70, 129.64, 128.62, 128.44, 127.15, 125.46, 122.34, 62.85, 62.67, 60.28. **HRMS** (ESI) calcd for  $C_{34}H_{31}Br_2N_2$   $m/z$  627.0831  $[M+H]^+$ , Found 627.0835.

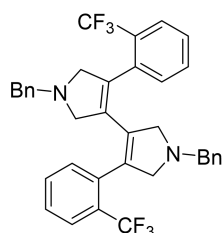

**3t**



**1,1'-dibenzyl-4,4'-bis(2-(trifluoromethyl)phenyl)-2,2',5,5'-tetrahydro-1H,1'H-3,3'-bipyrrole 3t.** The product was purified by flash column chromatography on silica gel (height 23 cm, width 1.7 cm, eluent: petroleum ether/ethyl acetate, gradient: 20:1 to 5:1) as a yellow oil (70%, 84.7 mg).  $R_f$  (petroleum ether/ethyl acetate = 5:1): 0.42.  $^1\text{H}$  NMR (400 MHz,  $\text{CDCl}_3$ )  $\delta$  7.64 – 7.55 (m, 2H), 7.42 – 7.31 (m, 4H), 7.25 – 7.13 (m, 12H), 3.63 – 3.49 (m, 8H), 3.08 (t,  $J$  = 3.6 Hz, 4H).  $^{19}\text{F}$  NMR (376 MHz,  $\text{CDCl}_3$ )  $\delta$  -59.51 (s).  $^{13}\text{C}$  NMR (101 MHz,  $\text{CDCl}_3$ )  $\delta$  138.89, 135.66, 135.35, 131.68, 131.24, 131.00, 128.68, 128.66 (q,  $J$  = 31.3 Hz), 128.13, 127.62, 126.82, 125.93 (q,  $J$  = 5.1 Hz), 123.98 (q,  $J$  = 274.7 Hz), 65.89, 62.45, 60.34. HRMS (ESI) calcd for  $\text{C}_{36}\text{H}_{31}\text{F}_6\text{N}_2^+$   $m/z$  605.2386  $[\text{M}+\text{H}]^+$ , Found 605.2396.

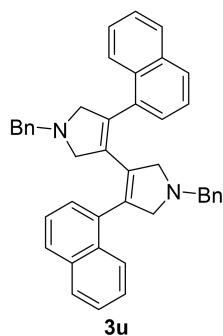

**1,1'-dibenzyl-4,4'-di(naphthalen-1-yl)-2,2',5,5'-tetrahydro-1H,1'H-3,3'-bipyrrole 3u.** The product was purified by flash column chromatography on silica gel (height 23 cm, width 1.7 cm, eluent: petroleum ether/ethyl acetate, gradient: 20:1 to 5:1) as a colorless oil (57%, 64.8 mg).  $R_f$  (petroleum ether/ethyl acetate = 5:1): 0.39.  $^1\text{H}$  NMR (400 MHz,  $\text{CDCl}_3$ )  $\delta$  7.90 – 7.80 (m, 4H), 7.73 (d,  $J$  = 8.0 Hz, 2H), 7.56 – 7.46 (m, 4H), 7.39 – 7.30 (m, 2H), 7.25 – 7.19 (m, 2H), 7.19 – 7.09 (m, 6H), 7.08 – 7.00 (m, 4H), 3.64 (s, 4H), 3.49 (s, 4H), 3.19 (s, 4H).  $^{13}\text{C}$  NMR (101 MHz,  $\text{CDCl}_3$ )  $\delta$  138.76, 136.71, 134.58, 133.37, 131.85, 131.64, 128.71, 128.30, 128.15, 127.70, 126.82, 126.05, 126.01, 125.81, 125.70, 125.10, 65.80, 62.57, 60.29. HRMS (ESI) calcd for  $\text{C}_{42}\text{H}_{37}\text{N}_2^+$   $m/z$  569.2951  $[\text{M}+\text{H}]^+$ , Found 569.2963.

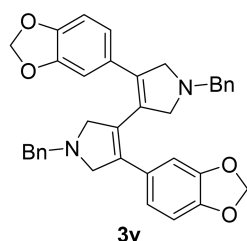

**4,4'-bis(benzo[d][1,3]dioxol-5-yl)-1,1'-dibenzyl-2,2',5,5'-tetrahydro-1H,1'H-3,3'-bipyrrole 3v.** The product was purified by flash column chromatography on silica gel (height 23 cm, width 1.7 cm, eluent: petroleum ether/ethyl acetate, gradient: 20:1 to 5:1) as a yellow oil (78%, 86.9 mg).  $R_f$  (petroleum ether/ethyl acetate = 5:1): 0.37.  $^1\text{H}$  NMR (400 MHz,  $\text{CDCl}_3$ )  $\delta$  7.37 – 7.26 (m, 9H), 7.24 – 7.21 (m, 1H), 6.87 – 6.82 (m, 2H), 6.81 – 6.75 (m, 2H), 6.73 – 6.67 (m, 2H), 5.92 (s, 4H), 3.82 (t,  $J$  = 3.6 Hz, 4H), 3.78 (s, 4H), 3.57 (t,  $J$  = 3.6 Hz, 4H).  $^{13}\text{C}$  NMR (101 MHz,  $\text{CDCl}_3$ )  $\delta$  147.47, 146.78, 139.20, 135.37, 129.30, 129.15, 128.66, 128.35, 127.01, 120.72, 108.06, 107.25,

100.98, 62.98, 62.76, 60.35. **HRMS** (ESI) calcd for  $C_{36}H_{33}N_2O_4^+$   $m/z$  557.2435  $[M+H]^+$ , Found 557.2426.

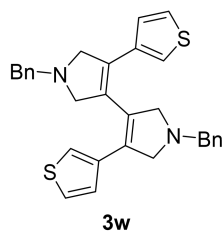

**1,1'-dibenzyl-4,4'-di(thiophen-3-yl)-2,2',5,5'-tetrahydro-1H,1'H-3,3'-bipyrrole 3w.**

The product was purified by flash column chromatography on silica gel (height 23 cm, width 1.7 cm, eluent: petroleum ether/ethyl acetate, gradient: 20:1 to 5:1) as a yellow oil (66%, 63.5 mg).  $R_f$  (petroleum ether/ethyl acetate = 5:1): 0.36.  **$^1H$  NMR** (400 MHz,  $CDCl_3$ )  $\delta$  7.42 – 7.32 (m, 8H), 7.29 – 7.25 (m, 2H), 7.25 – 7.17 (m, 4H), 7.17 – 7.11 (m, 2H), 3.98 – 3.91 (m, 4H), 3.89 – 3.83 (m, 4H), 3.72 – 3.65 (m, 4H).  **$^{13}C$  NMR** (101 MHz,  $CDCl_3$ )  $\delta$  139.28, 135.74, 130.75, 129.37, 128.65, 128.40, 127.06, 126.34, 125.38, 121.95, 62.87, 62.75, 60.42. **HRMS** (ESI) calcd for  $C_{30}H_{29}N_2S_2^+$   $m/z$  481.1767  $[M+H]^+$ , Found 481.1765.

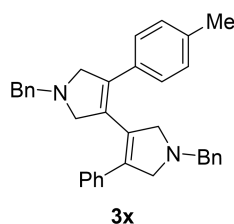

**1,1'-dibenzyl-4-phenyl-4'-(p-tolyl)-2,2',5,5'-tetrahydro-1H,1'H-3,3'-bipyrrole 3x.**

The product was purified by flash column chromatography on silica gel (height 23 cm, width 1.7 cm, eluent: petroleum ether/ethyl acetate, gradient: 20:1 to 5:1) as a colorless oil (50%, 48.3 mg).  $R_f$  (petroleum ether/ethyl acetate = 5:1): 0.35.  **$^1H$  NMR** (400 MHz,  $CDCl_3$ )  $\delta$  7.30 – 7.11 (m, 17H), 7.01 (d,  $J$  = 8.0 Hz, 2H), 3.82 (q,  $J$  = 3.6 Hz, 4H), 3.71 (d,  $J$  = 3.6 Hz, 4H), 3.51 (dt,  $J$  = 8.0, 3.6 Hz, 4H), 2.24 (s, 3H).  **$^{13}C$  NMR** (101 MHz,  $CDCl_3$ )  $\delta$  139.10, 137.27, 135.99, 135.85, 135.18, 132.21, 130.69, 129.54, 129.04, 128.74, 128.40, 128.30, 127.43, 127.09, 126.97, 126.88, 62.90, 62.85, 62.72, 60.41, 60.38, 21.34. **HRMS** (ESI) calcd for  $C_{35}H_{35}N_2^+$   $m/z$  483.2795  $[M+H]^+$ , Found 483.2788.

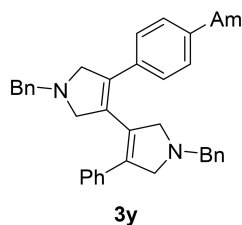

**1,1'-dibenzyl-4-(4-pentylphenyl)-4'-phenyl-2,2',5,5'-tetrahydro-1H,1'H-3,3'-bipyrrole 3y.**

The product was purified by flash column chromatography on silica gel (height 23 cm, width 1.7 cm, eluent: petroleum ether/ethyl acetate, gradient: 20:1 to 5:1) as a colorless oil (66%, 71.1mg).  $R_f$  (petroleum ether/ethyl acetate = 5:1): 0.48.  **$^1H$  NMR** (400 MHz,  $CDCl_3$ )  $\delta$  7.38 – 7.26 (m, 12H), 7.25 – 7.16 (m, 5H), 7.07 (d,  $J$  =

8.0 Hz, 2H), 3.96 – 3.85 (m, 4H), 3.79 (d,  $J = 6.0$  Hz, 4H), 3.65 – 3.51 (m, 4H), 2.56 (t,  $J = 7.6$  Hz, 2H), 1.64 – 1.53 (m, 2H), 1.36 – 1.25 (m, 4H), 0.89 (t,  $J = 6.8$  Hz, 3H).  $^{13}\text{C}$  NMR (75 MHz,  $\text{CDCl}_3$ )  $\delta$  142.32, 139.29, 135.95, 135.83, 135.15, 132.35, 130.63, 129.40, 128.71, 128.36, 128.31, 128.25, 127.35, 127.04, 126.93, 126.83, 62.85, 62.68, 60.39, 35.71, 31.53, 31.08, 22.57, 14.07. HRMS (ESI) calcd for  $\text{C}_{39}\text{H}_{43}\text{N}_2^+$   $m/z$  539.3421  $[\text{M}+\text{H}]^+$ , Found 539.3430.

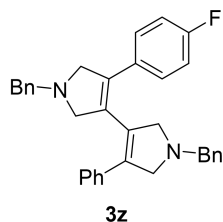

**1,1'-dibenzyl-4-(4-fluorophenyl)-4'-phenyl-2,2',5,5'-tetrahydro-1H,1'H-3,3'-bipyrrole 3z.** The product was purified by flash column chromatography on silica gel (height 23 cm, width 1.7 cm, eluent: petroleum ether/ethyl acetate, gradient: 20:1 to 5:1) as a yellow oil (75%, 73.1 mg).  $R_f$  (petroleum ether/ethyl acetate = 5:1): 0.44.  $^1\text{H}$  NMR (400 MHz,  $\text{CDCl}_3$ )  $\delta$  7.37 – 7.26 (m, 11H), 7.25 – 7.16 (m, 6H), 6.95 – 6.90 (m, 2H), 3.92 – 3.81 (m, 4H), 3.81 – 3.76 (m, 4H), 3.61 – 3.52 (m, 4H).  $^{19}\text{F}$  NMR (376 MHz,  $\text{CDCl}_3$ )  $\delta$  -113.85 (s), 113.95 (s).  $^{13}\text{C}$  NMR (101 MHz,  $\text{CDCl}_3$ )  $\delta$  163.65, 160.37, 139.03 (d,  $J = 7.3$  Hz), 136.35, 136.07, 135.26, 135.08, 134.98, 131.29, 131.20, 130.37 (d,  $J = 17.9$  Hz), 130.10, 129.95, 128.68, 128.63, 128.58, 128.52, 128.48, 128.43, 128.41, 128.28, 127.46, 127.13 (d,  $J = 4.7$  Hz), 126.95, 126.88, 115.17 (d,  $J = 28.6$  Hz), 62.89, 62.87, 62.75, 62.71, 60.34, 60.30. HRMS (ESI) calcd for  $\text{C}_{34}\text{H}_{32}\text{FN}_2^+$   $m/z$  487.2544  $[\text{M}+\text{H}]^+$ , Found 487.2533.

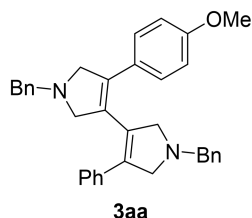

**1,1'-dibenzyl-4-(4-methoxyphenyl)-4'-phenyl-2,2',5,5'-tetrahydro-1H,1'H-3,3'-bipyrrole 3aa.** The product was purified by flash column chromatography on silica gel (height 23 cm, width 1.7 cm, eluent: petroleum ether/ethyl acetate, gradient: 20:1 to 5:1) as a colorless oil (63%, 62.8 mg).  $R_f$  (petroleum ether/ethyl acetate = 5:1): 0.28.  $^1\text{H}$  NMR (400 MHz,  $\text{CDCl}_3$ )  $\delta$  7.30 – 7.11 (m, 17H), 6.73 (d,  $J = 8.4$  Hz, 2H), 3.82 (dt,  $J = 9.6, 4.0$  Hz, 4H), 3.71 (d,  $J = 6.8$  Hz, 4H), 3.68 (s, 3H), 3.51 (dt,  $J = 10.0, 3.6$  Hz, 4H).  $^{13}\text{C}$  NMR (101 MHz,  $\text{CDCl}_3$ )  $\delta$  158.97, 139.20, 135.80, 135.54, 135.23, 130.82, 128.75, 128.57, 128.43, 128.33, 128.25, 127.78, 127.42, 127.11, 126.95, 113.77, 62.93, 62.86, 62.76, 60.45, 60.41, 55.29. HRMS (ESI) calcd for  $\text{C}_{35}\text{H}_{35}\text{N}_2\text{O}^+$   $m/z$  499.2744  $[\text{M}+\text{H}]^+$ , Found 499.2753.

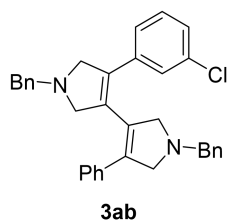

**1,1'-dibenzyl-4-(3-chlorophenyl)-4'-phenyl-2,2',5,5'-tetrahydro-1H,1'H-3,3'-bipyrr role 3ab.** The product was purified by flash column chromatography on silica gel (height 23 cm, width 1.7 cm, eluent: petroleum ether/ethyl acetate, gradient: 20:1 to 5:1) as a yellow oil (60%, 60.4 mg).  $R_f$  (petroleum ether/ethyl acetate = 5:1): 0.39.  $^1\text{H}$  NMR (400 MHz,  $\text{CDCl}_3$ )  $\delta$  7.28 – 7.01 (m, 19H), 3.81 (t,  $J$  = 3.6 Hz, 2H), 3.75 (t,  $J$  = 4.0 Hz, 2H), 3.71 (d,  $J$  = 9.6 Hz, 4H), 3.51 (m, 4H).  $^{13}\text{C}$  NMR (75 MHz,  $\text{CDCl}_3$ )  $\delta$  139.22, 139.07, 137.00, 136.88, 136.83, 135.35, 135.07, 134.61, 134.12, 132.10, 131.28, 129.81, 129.47, 128.67, 128.47, 128.43, 128.30, 127.51, 127.40, 127.29, 127.17, 127.13, 127.09, 126.90, 126.85, 126.81, 125.10, 125.05, 62.95, 62.86, 62.73, 62.67, 60.38, 60.29. HRMS (ESI) calcd for  $\text{C}_{34}\text{H}_{32}\text{ClN}_2^+$   $m/z$  503.2249  $[\text{M}+\text{H}]^+$ , Found 503.2239.

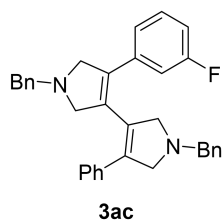

**1,1'-dibenzyl-4-(3-fluorophenyl)-4'-phenyl-2,2',5,5'-tetrahydro-1H,1'H-3,3'-bipyrr role 3ac.** The product was purified by flash column chromatography on silica gel (height 23 cm, width 1.7 cm, eluent: petroleum ether/ethyl acetate, gradient: 20:1 to 5:1) as a colorless oil (70%, 68.2 mg).  $R_f$  (petroleum ether/ethyl acetate = 5:1): 0.42.  $^1\text{H}$  NMR (400 MHz,  $\text{CDCl}_3$ )  $\delta$  7.38 – 7.25 (m, 11H), 7.24 – 7.13 (m, 4H), 7.12 – 6.90 (m, 3H), 6.87 (td,  $J$  = 8.4, 2.4 Hz, 1H), 3.87 (dt,  $J$  = 17.6, 4.0 Hz, 4H), 3.79 (d,  $J$  = 6.0 Hz, 4H), 3.64 – 3.55 (m, 4H).  $^{19}\text{F}$  NMR (376 MHz,  $\text{CDCl}_3$ )  $\delta$  -113.18 (s), -113.28 (s).  $^{13}\text{C}$  NMR (101 MHz,  $\text{CDCl}_3$ )  $\delta$  162.63 (d,  $J$  = 243.8 Hz), 139.07 (d,  $J$  = 9.0 Hz), 137.23 (d,  $J$  = 7.5 Hz), 136.55, 135.23 (d,  $J$  = 2.3 Hz), 134.96, 134.66 (d,  $J$  = 2.3 Hz), 131.91, 131.27, 129.83, 129.63 (d,  $J$  = 8.3 Hz), 129.57 (d,  $J$  = 8.3 Hz), 128.57, 128.32, 128.20, 127.39, 127.01, 126.98, 126.87, 126.78, 122.56 (d,  $J$  = 3.0 Hz), 122.49 (d,  $J$  = 3.0 Hz), 114.16 (d,  $J$  = 21.0 Hz), 114.04 (d,  $J$  = 21.0 Hz), 113.56 (d,  $J$  = 22.5 Hz), 113.51 (d,  $J$  = 21.8 Hz), 62.84, 62.79, 62.73, 62.67, 60.26, 60.17. HRMS (ESI) calcd for  $\text{C}_{34}\text{H}_{32}\text{FN}_2^+$   $m/z$  487.2544  $[\text{M}+\text{H}]^+$ , Found 487.2543.

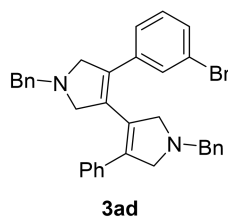

**1,1'-dibenzyl-4-(3-bromophenyl)-4'-phenyl-2,2',5,5'-tetrahydro-1H,1'H-3,3'-bipyrrrole 3ad.** The product was purified by flash column chromatography on silica gel (height 23 cm, width 1.7 cm, eluent: petroleum ether/ethyl acetate, gradient: 20:1 to 5:1) as a colorless oil (59%, 64.6 mg).  $R_f$  (petroleum ether/ethyl acetate = 5:1): 0.39.  $^1\text{H NMR}$  (400 MHz,  $\text{CDCl}_3$ )  $\delta$  7.40 – 7.18 (m, 17H), 7.14 – 7.01 (m, 2H), 3.93 – 3.73 (m, 8H), 3.65 – 3.53 (m, 4H).  $^{13}\text{C NMR}$  (75 MHz,  $\text{CDCl}_3$ )  $\delta$  139.17, 139.02, 137.26, 137.14, 136.86, 135.29, 135.03, 134.50, 132.11, 131.21, 130.29, 130.19, 129.72, 129.67, 128.67, 128.46, 128.43, 128.42, 128.29, 127.51, 127.17, 127.13, 127.09, 126.89, 125.52, 125.48, 122.36, 62.93, 62.86, 62.82, 62.69, 62.62, 60.40, 60.30. **HRMS** (ESI) calcd for  $\text{C}_{34}\text{H}_{32}\text{BrN}_2^+$   $m/z$  547.1743  $[\text{M}+\text{H}]^+$ , Found 547.1740.

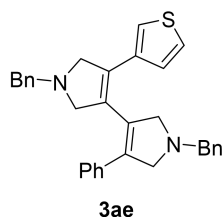

**1,1'-dibenzyl-4-phenyl-4'-(thiophen-3-yl)-2,2',5,5'-tetrahydro-1H,1'H-3,3'-bipyrrole 3ae.** The product was purified by flash column chromatography on silica gel (height 23 cm, width 1.7 cm, eluent: petroleum ether/ethyl acetate, gradient: 20:1 to 5:1) as a yellow oil (64%, 60.8 mg).  $R_f$  (petroleum ether/ethyl acetate = 5:1): 0.46.  $^1\text{H NMR}$  (400 MHz,  $\text{CDCl}_3$ )  $\delta$  7.32 – 7.20 (m, 10H), 7.20 – 7.13 (m, 5H), 7.13 – 7.07 (m, 2H), 7.07 – 7.02 (m, 1H), 3.87 (t,  $J$  = 3.6 Hz, 2H), 3.81 (t,  $J$  = 4.4 Hz, 2H), 3.77 (s, 2H), 3.74 – 3.68 (m, 2H), 3.60 (t,  $J$  = 4.0 Hz, 2H), 3.57 – 3.49 (m, 2H).  $^{13}\text{C NMR}$  (101 MHz,  $\text{CDCl}_3$ )  $\delta$  139.32, 139.27, 136.07, 135.89, 135.77, 135.52, 135.21, 134.98, 131.11, 130.79, 130.59, 129.40, 128.71, 128.46, 128.45, 128.35, 127.44, 127.13, 127.10, 126.98, 126.75, 126.57, 126.39, 125.48, 122.03, 63.08, 62.93, 62.84, 62.81, 62.65, 60.48, 60.41. **HRMS** (ESI) calcd for  $\text{C}_{32}\text{H}_{31}\text{N}_2\text{S}^+$   $m/z$  475.2202  $[\text{M}+\text{H}]^+$ , Found 475.2199.

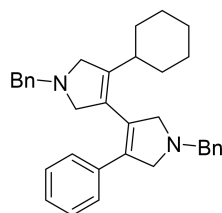

**4-([1,1'-biphenyl]-4-yl)-1,1'-dibenzyl-4'-cyclohexyl-2,2',5,5'-tetrahydro-1H,1'H-3,3'-bipyrrole 3af.** The product was purified by flash column chromatography on silica gel (height 23 cm, width 1.7 cm, eluent: petroleum ether/ethyl acetate, gradient: 20:1 to 5:1) as a colorless oil (76%, 93.0 mg).  $R_f$  (petroleum ether/ethyl acetate = 5:1): 0.44.  $^1\text{H NMR}$  (400 MHz,  $\text{CDCl}_3$ )  $\delta$  7.38 – 7.17 (m, 15H), 3.88 (t,  $J$  = 4.0 Hz, 2H), 3.84 (s, 2H), 3.73 (s, 2H), 3.67 (t,  $J$  = 4.0 Hz, 2H), 3.51 – 3.44 (m, 2H), 3.43 – 3.36 (m, 2H), 1.58 – 1.46 (m, 3H), 1.23 – 1.15 (m, 2H), 1.05 – 0.90 (m, 5H).  $^{13}\text{C NMR}$  (101 MHz,  $\text{CDCl}_3$ )  $\delta$  142.26, 139.41, 139.21, 135.81, 134.76, 130.22, 128.83, 128.79, 128.44, 128.33, 128.19, 127.22, 127.14, 127.12, 126.96, 125.96, 64.47, 63.24, 62.19, 60.84,

60.62, 59.76, 37.76, 30.99, 26.29, 26.03. **HRMS** (ESI) calcd for  $C_{34}H_{39}N_2^+$   $m/z$  475.3113  $[M+H]^+$ , Found 475.3115.

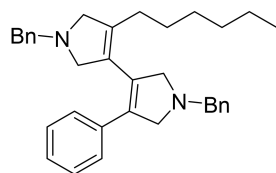

**3ag**

**1,1'-dibenzyl-4-hexyl-4'-phenyl-2,2',5,5'-tetrahydro-1H,1'H-3,3'-bipyrrole 3ag.**

The product was purified by flash column chromatography on silica gel (height 23 cm, width 1.7 cm, eluent: petroleum ether/ethyl acetate, gradient: 20:1 to 5:1) as a yellow oil (68%, 64.0 mg).  $R_f$  (petroleum ether/ethyl acetate = 5:1): 0.47.  **$^1H$  NMR** (400 MHz,  $CDCl_3$ )  $\delta$  7.39 – 7.26 (m, 13H), 7.25 – 7.23 (m, 2H), 3.88 (t,  $J$  = 4.0 Hz, 2H), 3.83 (s, 2H), 3.74 (s, 2H), 3.67 (t,  $J$  = 4.0 Hz, 2H), 3.51 – 3.47 (m, 2H), 3.43 – 3.38 (m, 2H), 1.84 – 1.76 (m, 2H), 1.24 – 1.14 (m, 3H), 1.09 – 1.02 (m, 5H), 0.85 – 0.80 (m, 3H).  **$^{13}C$  NMR** (101 MHz,  $CDCl_3$ )  $\delta$  139.41, 139.24, 137.85, 135.77, 134.76, 130.01, 128.79, 128.72, 128.41, 128.32, 128.14, 127.39, 127.17, 127.09, 127.06, 126.94, 64.21, 63.20, 62.66, 62.21, 60.70, 60.59, 31.62, 29.41, 28.26, 27.36, 22.57, 14.13. **HRMS** (ESI) calcd for  $C_{34}H_{41}N_2^+$   $m/z$  477.3264  $[M+H]^+$ , Found 477.3251.

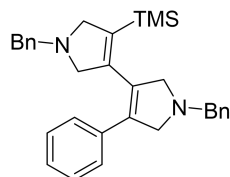

**3ah**

**1,1'-dibenzyl-4-phenyl-4'-(trimethylsilyl)-2,2',5,5'-tetrahydro-1H,1'H-3,3'-bipyrrole 3ah.**

The product was purified by flash column chromatography on silica gel (height 23 cm, width 1.7 cm, eluent: petroleum ether/ethyl acetate, gradient: 20:1 to 5:1) as a yellow oil (72%, 66.9 mg).  $R_f$  (petroleum ether/ethyl acetate = 5:1): 0.45.  **$^1H$  NMR** (300 MHz,  $CDCl_3$ )  $\delta$  7.47 – 7.28 (m, 15H), 4.02 – 3.95 (m, 2H), 3.93 (s, 2H), 3.89 (s, 2H), 3.80 – 3.59 (m, 6H), -0.03 (s, 9H).  **$^{13}C$  NMR** (75 MHz,  $CDCl_3$ )  $\delta$  144.66, 139.55, 139.36, 136.78, 135.04, 134.21, 132.53, 128.81, 128.75, 128.72, 128.44, 128.40, 128.25, 127.23, 127.11, 127.01, 65.38, 65.33, 64.13, 62.79, 60.55, 60.53, -1.52. **HRMS** (ESI) calcd for  $C_{31}H_{37}N_2Si^+$   $m/z$  465.2726  $[M+H]^+$ , Found 465.2730.

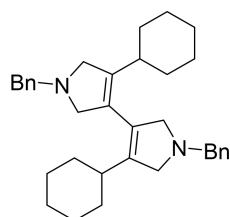

**3ai**

**1,1'-dibenzyl-4,4'-dicyclohexyl-2,2',5,5'-tetrahydro-1H,1'H-3,3'-bipyrrole 3ai.**

The product was purified by flash column chromatography on silica gel (height 23 cm, width 1.7 cm, eluent: petroleum ether/ethyl acetate, gradient: 20:1 to 5:1) as a yellow oil (72%, 66.9 mg).  $R_f$  (petroleum ether/ethyl acetate = 5:1): 0.32.  $^1\text{H}$  NMR (300 MHz,  $\text{CDCl}_3$ )  $\delta$  7.46 – 7.37 (m, 10H), 3.85 – 3.74 (m, 6H), 3.57 – 3.48 (m, 8H), 2.90 (s, 2H), 1.82 – 1.58 (m, 10H), 1.35 – 1.16 (m, 10H).  $^{13}\text{C}$  NMR (75 MHz,  $\text{CDCl}_3$ )  $\delta$  141.00, 139.49, 128.90, 128.64, 128.37, 128.33, 127.01, 126.20, 63.33, 61.00, 59.68, 59.57, 52.44, 37.51, 31.68, 26.38, 26.12. HRMS (ESI) calcd for  $\text{C}_{34}\text{H}_{44}\text{N}_2\text{Na}^+$   $m/z$  503.3397  $[\text{M}+\text{H}]^+$ , Found 503.3389.

**6. Optimization of Dehydrogenation Reaction Conditions.<sup>[a]</sup>**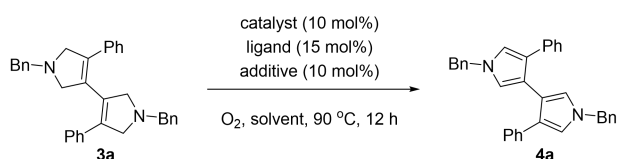

| Entry | Cat. (X mol%)                              | Add. (Y mol%)                   | Sol./Temp.(°C)/time (h) | Yield(%) <sup>[b]</sup> |
|-------|--------------------------------------------|---------------------------------|-------------------------|-------------------------|
| 1     | CuI (10)                                   | Pyridine (15)/TsOH (10)         | toluene/90/12           | 62                      |
| 2     | CuCl (10)                                  | Pyridine (15)/TsOH (10)         | toluene/90/12           | 59                      |
| 3     | CuBr (10)                                  | Pyridine (15)/TsOH (10)         | toluene/90/12           | 55                      |
| 4     | Cu <sub>2</sub> O (10)                     | Pyridine (15)/TsOH (10)         | toluene/90/12           | 79                      |
| 5     | CuCN (10)                                  | Pyridine (15)/TsOH (10)         | toluene/90/12           | 60                      |
| 6     | CuCl <sub>2</sub> (10)                     | Pyridine (15)/TsOH (10)         | toluene/90/12           | 49                      |
| 7     | Cu(OAc) <sub>2</sub> (10)                  | Pyridine (15)/TsOH (10)         | toluene/90/12           | 38                      |
| 8     | Cu(MeCN) <sub>4</sub> PF <sub>6</sub> (10) | Pyridine (15)/TsOH (10)         | toluene/90/12           | 28                      |
| 9     | CuF <sub>2</sub> (10)                      | Pyridine (15)/TsOH (10)         | toluene/90/12           | 37                      |
| 10    | Cu <sub>2</sub> O (10)                     | Pyridine (15)/TsOH (10)         | <i>o</i> -xylene/90/12  | 69                      |
| 11    | Cu <sub>2</sub> O (10)                     | Pyridine (15)/TsOH (10)         | PhCl/90/12              | 66                      |
| 12    | Cu <sub>2</sub> O (10)                     | Pyridine (15)/TsOH (10)         | 1,4-Dioxane/90/12       | 45                      |
| 13    | Cu <sub>2</sub> O (10)                     | Pyridine (15)/TsOH (10)         | DMF/90/12               | 47                      |
| 14    | Cu <sub>2</sub> O (10)                     | Pyridine (15)/TsOH (10)         | NMP/90/12               | 64                      |
| 15    | Cu <sub>2</sub> O (10)                     | Pyridine (15)/TsOH (10)         | MeCN/90/12              | 60                      |
| 16    | Cu <sub>2</sub> O (10)                     | Pyridine (15)/TsOH (10)         | DMSO/90/12              | 51                      |
| 17    | Cu <sub>2</sub> O (10)                     | 2,2'-bpy (15)/TsOH (10)         | toluene/90/12           | 44                      |
| 18    | Cu <sub>2</sub> O (10)                     | 1,10-phen (15)/TsOH (10)        | toluene/90/12           | 29                      |
| 19    | Cu <sub>2</sub> O (10)                     | 2,2'-bipyrimidine(15)/TsOH (10) | toluene/90/12           | 18                      |
| 20    | Cu <sub>2</sub> O (10)                     | triethylamine (15)/TsOH (10)    | toluene/90/12           | 33                      |
| 21    | Cu <sub>2</sub> O (10)                     | Pyridine (15)/TsOH (10)         | toluene/80/12           | 61                      |

|                   |                        |                                                      |               |    |
|-------------------|------------------------|------------------------------------------------------|---------------|----|
| 22                | Cu <sub>2</sub> O (10) | Pyridine (15)/TsOH (10)                              | toluene/70/12 | 40 |
| 23                | Cu <sub>2</sub> O (10) | Pyridine (15)/AcOH (10)                              | toluene/90/12 | 37 |
| 24                | Cu <sub>2</sub> O (10) | Pyridine (15)/TFA (10)                               | toluene/90/12 | 45 |
| 25                | Cu <sub>2</sub> O (10) | Pyridine (15)/CF <sub>3</sub> SO <sub>3</sub> H (10) | toluene/90/12 | 16 |
| 26 <sup>[c]</sup> | Cu <sub>2</sub> O (10) | Pyridine (15)/TsOH (10)                              | toluene/90/12 | 58 |

Reaction conditions: [a]tetrahydrobipyrrole **3a** (0.2 mmol, 1.0 equiv.), copper salt (0.02 mmol, 10 mol%), ligand (0.03 mmol, 15 mol%), acid additive (0.02 mmol, 10 mol%), in solvent (2 mL), under O<sub>2</sub> (1 atm), at indicated temperature for 12 h. [b]Isolated yield. [c]under air.

## 7. General procedure for the synthesis of derivatives 4.

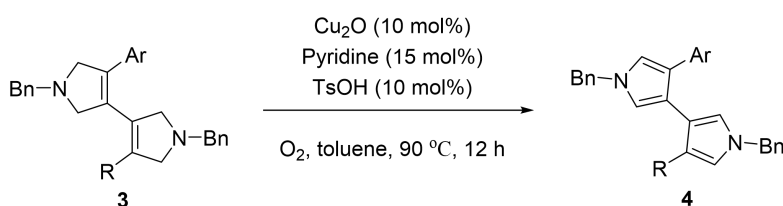

An oven-dried 25 mL reaction tube equipped with a stirring bar was charged with derivatives **3** (0.20 mmol, 1.0 equiv.), Cu<sub>2</sub>O (2.9 mg, 0.02 mmol, 0.1 equiv.), pyridine (2.4 mg, 0.03 mmol, 0.15 equiv.), TsOH • H<sub>2</sub>O (3.4 mg, 0.02 mmol, 0.1 equiv.) and toluene (2 mL). The tube was evacuated and filled with 1 atm O<sub>2</sub>, and stirred rigorously at 90 °C for 12 h. After reaction completed, the mixture was cooled down to room temperature, and the volatiles were removed under reduced pressure. The residue was purified by flash chromatography on silica gel to afford the corresponding products **4**.

## 8. Purification and characterization of derivatives 4.

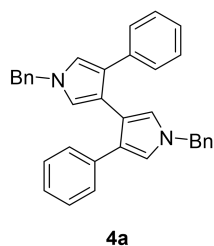

**1,1'-dibenzyl-4,4'-diphenyl-1H,1'H-3,3'-bipyrrole 4a.** The product was purified by flash column chromatography on silica gel (height 18 cm, width 1.5 cm, eluent: petroleum ether/ethyl acetate, gradient: 100:0 to 50:1) as a yellow oil (79%, 73.3 mg). *R<sub>f</sub>* (petroleum ether/ethyl acetate = 50:1): 0.36. <sup>1</sup>H NMR (400 MHz, CDCl<sub>3</sub>) δ 7.40 – 7.22 (m, 10H), 7.18 – 7.01 (m, 10H), 6.83 (s, 2H), 6.50 (s, 2H), 4.99 (s, 4H). <sup>13</sup>C NMR (101 MHz, CDCl<sub>3</sub>) δ 138.11, 136.23, 128.60, 127.83, 127.51, 127.37, 126.83, 124.93, 124.72, 122.00, 119.19, 116.26, 53.32. HRMS (ESI) calcd for C<sub>34</sub>H<sub>29</sub>N<sub>2</sub><sup>+</sup> *m/z* 465.2331 [M+H]<sup>+</sup>, Found 465.2322.



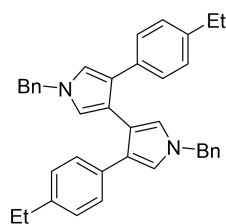

4b

**1,1'-dibenzyl-4,4'-bis(4-ethylphenyl)-1H,1'H-3,3'-bipyrrole 4b.** The product was purified by flash column chromatography on silica gel (height 18 cm, width 1.5 cm, eluent: petroleum ether/ethyl acetate, gradient: 100:0 to 20:1) as a yellow oil (75%, 78.0 mg).  $R_f$  (petroleum ether/ethyl acetate = 20:1): 0.34.  $^1\text{H NMR}$  (400 MHz,  $\text{CDCl}_3$ )  $\delta$  7.40 – 7.29 (m, 10H), 7.17 (d,  $J$  = 6.8 Hz, 4H), 7.05 (d,  $J$  = 8.0 Hz, 4H), 6.88 (d,  $J$  = 2.4 Hz, 2H), 6.56 (d,  $J$  = 2.4 Hz, 2H), 5.04 (s, 4H), 2.64 (q,  $J$  = 7.6 Hz, 4H), 1.26 (t,  $J$  = 7.2 Hz, 6H).  $^{13}\text{C NMR}$  (101 MHz,  $\text{CDCl}_3$ )  $\delta$  140.84, 138.38, 133.72, 128.65, 127.55, 127.48, 127.43, 126.92, 124.86, 122.07, 119.06, 116.42, 53.39, 28.59, 15.75. **HRMS** (ESI) calcd for  $\text{C}_{38}\text{H}_{37}\text{N}_2^+$   $m/z$  521.2957  $[\text{M}+\text{H}]^+$ , Found 521.2950.

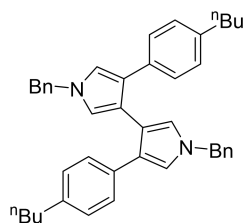

4c

**1,1'-dibenzyl-4,4'-bis(4-butylphenyl)-1H,1'H-3,3'-bipyrrole 4c.** The product was purified by flash column chromatography on silica gel (height 18 cm, width 1.5 cm, eluent: petroleum ether/ethyl acetate, gradient: 100:0 to 20:1) as a yellow oil (68%, 78.4 mg).  $R_f$  (petroleum ether/ethyl acetate = 20:1): 0.42.  $^1\text{H NMR}$  (400 MHz,  $\text{CDCl}_3$ )  $\delta$  7.40 – 7.31 (m, 10H), 7.19 (d,  $J$  = 6.8 Hz, 4H), 7.05 (d,  $J$  = 8.0 Hz, 4H), 6.89 (d,  $J$  = 2.4 Hz, 2H), 6.58 (d,  $J$  = 2.4 Hz, 2H), 5.06 (s, 4H), 2.62 (t,  $J$  = 7.6 Hz, 4H), 1.69 – 1.61 (m, 4H), 1.46 – 1.39 (m, 4H), 1.01 (t,  $J$  = 7.2 Hz, 6H).  $^{13}\text{C NMR}$  (101 MHz,  $\text{CDCl}_3$ )  $\delta$  139.48, 138.42, 133.70, 128.67, 128.04, 127.55, 127.36, 126.94, 124.88, 122.04, 119.08, 116.48, 53.40, 35.41, 33.81, 22.49, 14.13. **HRMS** (ESI) calcd for  $\text{C}_{42}\text{H}_{45}\text{N}_2^+$   $m/z$  577.3583  $[\text{M}+\text{H}]^+$ , Found 577.3580.

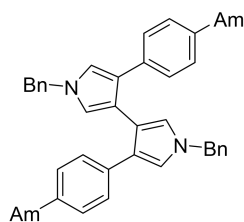

4d

**1,1'-dibenzyl-4,4'-bis(4-pentylphenyl)-1H,1'H-3,3'-bipyrrole 4d.** The product was purified by flash column chromatography on silica gel (height 18 cm, width 1.5 cm, eluent: petroleum ether/ethyl acetate, gradient: 100:0 to 20:1) as a yellow oil (64%, 77.4 mg).  $R_f$  (petroleum ether/ethyl acetate = 20:1): 0.39.  $^1\text{H NMR}$  (400 MHz,  $\text{CDCl}_3$ )

$\delta$  7.37 – 7.27 (m, 10H), 7.16 (d,  $J$  = 6.8 Hz, 4H), 7.01 (d,  $J$  = 7.6 Hz, 4H), 6.86 (d,  $J$  = 2.4 Hz, 2H), 6.55 (d,  $J$  = 2.4 Hz, 2H), 5.04 (s, 4H), 2.57 (t,  $J$  = 8.0 Hz, 4H), 1.65 – 1.59 (m, 4H), 1.40 – 1.33 (m, 8H), 0.94 (t,  $J$  = 6.8 Hz, 6H).  $^{13}\text{C}$  NMR (101 MHz,  $\text{CDCl}_3$ )  $\delta$  139.51, 138.37, 133.65, 128.64, 127.99, 127.52, 127.31, 126.90, 124.85, 122.02, 119.03, 116.42, 53.38, 35.67, 31.63, 31.30, 22.65, 14.13. HRMS (ESI) calcd for  $\text{C}_{44}\text{H}_{49}\text{N}_2^+$   $m/z$  605.3896  $[\text{M}+\text{H}]^+$ , Found 605.3898.

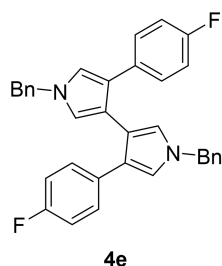

**1,1'-dibenzyl-4,4'-bis(4-fluorophenyl)-1H,1'H-3,3'-bipyrrole 4e.** The product was purified by flash column chromatography on silica gel (height 18 cm, width 1.5 cm, eluent: petroleum ether/ethyl acetate, gradient: 100:0 to 20:1) as a yellow oil (76%, 76.0 mg).  $R_f$  (petroleum ether/ethyl acetate = 20:1): 0.34.  $^1\text{H}$  NMR (400 MHz,  $\text{CDCl}_3$ )  $\delta$  7.38 – 7.29 (m, 6H), 7.20 – 7.13 (m, 8H), 6.85 – 6.77 (m, 6H), 6.53 (d,  $J$  = 2.4 Hz, 2H), 5.03 (s, 4H).  $^{19}\text{F}$  NMR (376 MHz,  $\text{CDCl}_3$ )  $\delta$  -118.6 (s).  $^{13}\text{C}$  NMR (101 MHz,  $\text{CDCl}_3$ )  $\delta$  160.91 (d,  $J$  = 244.3 Hz), 137.94, 132.20 (d,  $J$  = 3.4 Hz), 128.80 (d,  $J$  = 7.5 Hz), 128.67, 127.68, 126.93, 123.80, 121.59, 119.06, 116.18, 114.48 (d,  $J$  = 21.1 Hz), 53.40. HRMS (ESI) calcd for  $\text{C}_{34}\text{H}_{27}\text{N}_2\text{F}_2^+$   $m/z$  501.2142  $[\text{M}+\text{H}]^+$ , Found 501.2133.

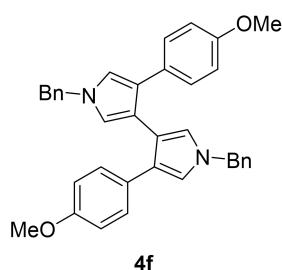

**1,1'-dibenzyl-4,4'-bis(4-methoxyphenyl)-1H,1'H-3,3'-bipyrrole 4f.** The product was purified by flash column chromatography on silica gel (height 18 cm, width 1.5 cm, eluent: petroleum ether/ethyl acetate, gradient: 100:0 to 10:1) as a yellow oil (68%, 71.3 mg).  $R_f$  (petroleum ether/ethyl acetate = 10:1): 0.31.  $^1\text{H}$  NMR (400 MHz,  $\text{CDCl}_3$ )  $\delta$  7.34 – 7.19 (m, 11H), 7.11 (d,  $J$  = 7.2 Hz, 4H), 6.75 (d,  $J$  = 2.4 Hz, 2H), 6.73 – 6.66 (m, 4H), 6.47 (d,  $J$  = 2.4 Hz, 2H), 4.97 (s, 4H), 3.74 (s, 6H).  $^{13}\text{C}$  NMR (101 MHz,  $\text{CDCl}_3$ )  $\delta$  157.38, 138.32, 129.10, 128.65, 128.60, 127.56, 126.96, 124.46, 121.87, 118.67, 116.26, 113.43, 55.24, 53.37. HRMS (ESI) calcd for  $\text{C}_{36}\text{H}_{33}\text{N}_2\text{O}_2^+$   $m/z$  525.2542  $[\text{M}+\text{H}]^+$ , Found 525.2538.

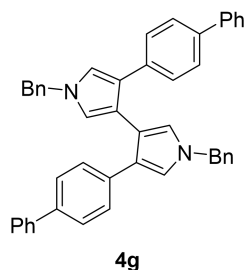

**4,4'-di([1,1'-biphenyl]-4-yl)-1,1'-dibenzyl-1H,1'H-3,3'-bipyrrole 4g.** The product was purified by flash column chromatography on silica gel (height 18 cm, width 1.5 cm, eluent: petroleum ether/ethyl acetate, gradient: 100:0 to 50:1) as a yellow oil (54%, 66.6 mg).  $R_f$  (petroleum ether/ethyl acetate = 50:1): 0.23.  $^1\text{H NMR}$  (400 MHz,  $\text{CDCl}_3$ )  $\delta$  7.56 – 7.52 (m, 4H), 7.43 – 7.36 (m, 12H), 7.34 – 7.25 (m, 8H), 7.17 (d,  $J$  = 6.4 Hz, 4H), 6.92 (d,  $J$  = 2.4 Hz, 2H), 6.59 (d,  $J$  = 2.4 Hz, 2H), 5.05 (s, 4H).  $^{13}\text{C NMR}$  (101 MHz,  $\text{CDCl}_3$ )  $\delta$  141.29, 138.05, 137.59, 135.41, 128.65, 128.61, 127.64, 127.61, 126.95, 126.78, 126.72, 126.58, 124.29, 122.09, 119.35, 116.44, 53.44. **HRMS** (ESI) calcd for  $\text{C}_{46}\text{H}_{37}\text{N}_2^+$   $m/z$  617.2957  $[\text{M}+\text{H}]^+$ , Found 617.2952.

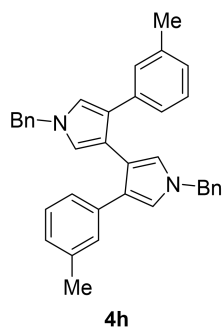

**1,1'-dibenzyl-4,4'-di-m-tolyl-1H,1'H-3,3'-bipyrrole 4h.** The product was purified by flash column chromatography on silica gel (height 18 cm, width 1.5 cm, eluent: petroleum ether/ethyl acetate, gradient: 100:0 to 20:1) as a yellow oil (75%, 73.8 mg).  $R_f$  (petroleum ether/ethyl acetate = 20:1): 0.34.  $^1\text{H NMR}$  (400 MHz,  $\text{CDCl}_3$ )  $\delta$  7.35 – 7.23 (m, 6H), 7.13 (d,  $J$  = 8.0 Hz, 8H), 7.04 (t,  $J$  = 7.6 Hz, 2H), 6.92 – 6.78 (m, 4H), 6.53 (s, 2H), 5.01 (s, 4H), 2.22 (s, 6H).  $^{13}\text{C NMR}$  (101 MHz,  $\text{CDCl}_3$ )  $\delta$  138.36, 137.27, 136.34, 128.72, 128.29, 127.83, 127.59, 126.89, 125.81, 124.98, 124.72, 122.04, 119.26, 116.47, 53.40, 21.57. **HRMS** (ESI) calcd for  $\text{C}_{36}\text{H}_{33}\text{N}_2^+$   $m/z$  493.2644  $[\text{M}+\text{H}]^+$ , Found 493.2635.

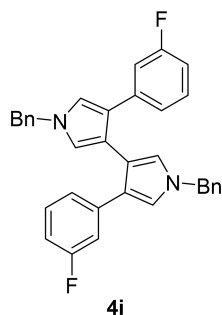

**1,1'-dibenzyl-4,4'-bis(3-fluorophenyl)-1H,1'H-3,3'-bipyrrole 4i.** The product was purified by flash column chromatography on silica gel (height 18 cm, width 1.5 cm, eluent: petroleum ether/ethyl acetate, gradient: 100:0 to 20:1) as a yellow oil (71%, 71.0 mg).  $R_f$ (petroleum ether/ethyl acetate = 20:1): 0.42.  $^1\text{H NMR}$  (400 MHz,  $\text{CDCl}_3$ )  $\delta$  7.40 – 7.25 (m, 6H), 7.16 (d,  $J$  = 7.6 Hz, 4H), 7.10 – 7.00 (m, 4H), 6.95 (d,  $J$  = 11.2 Hz, 2H), 6.88 (s, 2H), 6.73 (t,  $J$  = 10.0 Hz, 2H), 6.58 (s, 2H), 5.06 (s, 4H).  $^{19}\text{F NMR}$  (376 MHz,  $\text{CDCl}_3$ )  $\delta$  -114.5 (s).  $^{13}\text{C NMR}$  (101 MHz,  $\text{CDCl}_3$ )  $\delta$  162.67 (d,  $J$  = 243.8 Hz), 138.42 (d,  $J$  = 8.6 Hz), 137.84, 129.08 (d,  $J$  = 8.8 Hz), 128.74, 127.68, 126.81, 123.61 (d,  $J$  = 2.4 Hz), 122.71 (d,  $J$  = 2.7 Hz), 122.00, 119.71, 116.15, 113.78 (d,  $J$  = 21.9 Hz), 111.57 (d,  $J$  = 21.2 Hz), 53.43. **HRMS** (ESI) calcd for  $\text{C}_{34}\text{H}_{27}\text{F}_2\text{N}_2^+$   $m/z$  501.2142  $[\text{M}+\text{H}]^+$ , Found 501.2134.

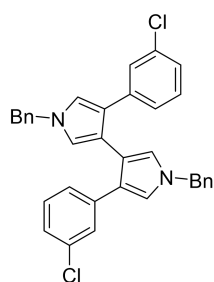

4j

**1,1'-dibenzyl-4,4'-bis(3-chlorophenyl)-1H,1'H-3,3'-bipyrrole 4j.** The product was purified by flash column chromatography on silica gel (height 18 cm, width 1.5 cm, eluent: petroleum ether/ethyl acetate, gradient: 100:0 to 20:1) as a yellow oil (72%, 76.8 mg).  $R_f$ (petroleum ether/ethyl acetate = 20:1): 0.46.  $^1\text{H NMR}$  (400 MHz,  $\text{CDCl}_3$ )  $\delta$  7.41 – 7.27 (m, 6H), 7.23 – 7.12 (m, 6H), 7.09 – 6.99 (m, 6H), 6.84 (d,  $J$  = 2.4 Hz, 2H), 6.59 (d,  $J$  = 2.4 Hz, 2H), 5.06 (s, 4H).  $^{13}\text{C NMR}$  (101 MHz,  $\text{CDCl}_3$ )  $\delta$  138.05, 137.89, 133.55, 128.97, 128.82, 127.73, 127.25, 126.89, 125.42, 124.88, 123.49, 121.79, 119.77, 116.21, 53.49. **HRMS** (ESI) calcd for  $\text{C}_{34}\text{H}_{27}\text{Cl}_2\text{N}_2^+$   $m/z$  533.1551  $[\text{M}+\text{H}]^+$ , Found 533.1541.

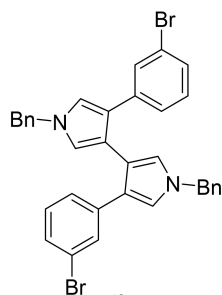

4k

**1,1'-dibenzyl-4,4'-bis(3-bromophenyl)-1H,1'H-3,3'-bipyrrole 4k.** The product was purified by flash column chromatography on silica gel (height 18 cm, width 1.5 cm, eluent: petroleum ether/ethyl acetate, gradient: 100:0 to 20:1) as a yellow oil (58%, 71.9 mg).  $R_f$ (petroleum ether/ethyl acetate = 20:1): 0.47.  $^1\text{H NMR}$  (400 MHz,  $\text{CDCl}_3$ )

$\delta$  7.40 – 7.21 (m, 8H), 7.21 – 7.01 (m, 8H), 6.92 (t,  $J$  = 8.0 Hz, 2H), 6.81 (s, 2H), 6.58 (s, 2H), 5.05 (s, 4H).  $^{13}\text{C}$  NMR (101 MHz,  $\text{CDCl}_3$ )  $\delta$  138.32, 137.88, 130.18, 129.23, 128.83, 127.76, 127.73, 126.91, 125.90, 123.38, 121.93, 121.67, 119.77, 116.21, 53.49. HRMS (ESI) calcd for  $\text{C}_{34}\text{H}_{27}\text{Br}_2\text{N}_2^+$   $m/z$  621.0541  $[\text{M}+\text{H}]^+$ , Found 621.0541.

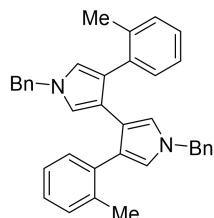

4l

**1,1'-dibenzyl-4,4'-di-o-tolyl-1H,1'H-3,3'-bipyrrole 4l.** The product was purified by flash column chromatography on silica gel (height 18 cm, width 1.5 cm, eluent: petroleum ether/ethyl acetate, gradient: 100:0 to 20:1) as a yellow oil (73%, 71.9 mg).  $R_f$  (petroleum ether/ethyl acetate = 50:1): 0.18.  $^1\text{H}$  NMR (400 MHz,  $\text{CDCl}_3$ )  $\delta$  7.42 – 7.28 (m, 6H), 7.22 – 7.05 (m, 12H), 6.51 (d,  $J$  = 2.4 Hz, 2H), 6.16 (d,  $J$  = 2.4 Hz, 2H), 4.91 (s, 4H), 2.16 (s, 6H).  $^{13}\text{C}$  NMR (101 MHz,  $\text{CDCl}_3$ )  $\delta$  138.53, 137.32, 136.77, 131.23, 129.67, 128.60, 127.44, 126.87, 126.32, 125.24, 123.01, 119.76, 118.83, 118.11, 53.22, 20.60. HRMS (ESI) calcd for  $\text{C}_{36}\text{H}_{33}\text{N}_2^+$   $m/z$  493.2644  $[\text{M}+\text{H}]^+$ , Found 493.2635.

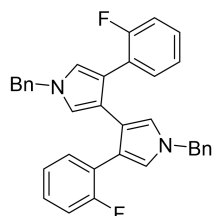

4m

**1,1'-dibenzyl-4,4'-bis(2-fluorophenyl)-1H,1'H-3,3'-bipyrrole 4m.** The product was purified by flash column chromatography on silica gel (height 18 cm, width 1.5 cm, eluent: petroleum ether/ethyl acetate, gradient: 100:0 to 20:1) as a yellow oil (73%, 70.0 mg).  $R_f$  (petroleum ether/ethyl acetate = 20:1): 0.47.  $^1\text{H}$  NMR (400 MHz,  $\text{CDCl}_3$ )  $\delta$  7.40 – 7.24 (m, 8H), 7.17 (d,  $J$  = 6.8 Hz, 4H), 7.08 – 7.01 (m, 2H), 7.00 – 6.88 (m, 6H), 6.57 (d,  $J$  = 2.8 Hz, 2H), 5.06 (s, 4H).  $^{19}\text{F}$  NMR (376 MHz,  $\text{CDCl}_3$ )  $\delta$  -115.48(s).  $^{13}\text{C}$  NMR (101 MHz,  $\text{CDCl}_3$ )  $\delta$  159.74 (d,  $J$  = 246.3 Hz), 138.12, 130.9 (d,  $J$  = 3.9 Hz), 128.71, 127.63, 126.98, 126.45 (d,  $J$  = 8.3 Hz), 123.80 (d,  $J$  = 14.3 Hz), 123.25 (d,  $J$  = 3.5 Hz), 121.82 (d,  $J$  = 7.1 Hz), 120.79, 117.40, 116.85, 115.17 (d,  $J$  = 23.2 Hz), 53.45. HRMS (ESI) calcd for  $\text{C}_{34}\text{H}_{27}\text{F}_2\text{N}_2^+$   $m/z$  501.2142  $[\text{M}+\text{H}]^+$ , Found 501.2139.

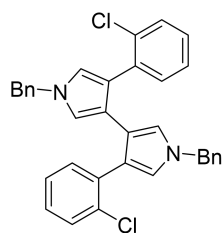

4n

**1,1'-dibenzyl-4,4'-bis(2-chlorophenyl)-1H,1'H-3,3'-bipyrrole 4n.** The product was purified by flash column chromatography on silica gel (height 18 cm, width 1.5 cm, eluent: petroleum ether/ethyl acetate, gradient: 100:0 to 50:1) as a yellow oil (65%, 69.1 mg).  $R_f$  (petroleum ether/ethyl acetate = 50:1): 0.32.  $^1\text{H NMR}$  (400 MHz,  $\text{CDCl}_3$ )  $\delta$  7.24 – 7.08 (m, 8H), 7.08 – 7.02 (m, 2H), 7.00 – 6.94 (m, 4H), 6.94 – 6.88 (m, 4H), 6.64 (d,  $J = 2.4$  Hz, 2H), 6.23 (d,  $J = 2.4$  Hz, 2H), 4.84 (s, 4H).  $^{13}\text{C NMR}$  (101 MHz,  $\text{CDCl}_3$ )  $\delta$  138.28, 135.20, 133.35, 132.42, 129.41, 128.66, 127.53, 126.88, 126.09, 121.44, 120.48, 119.62, 117.94, 53.36, one carbon was overlapped. **HRMS** (ESI) calcd for  $\text{C}_{34}\text{H}_{27}\text{Cl}_2\text{N}_2^+$   $m/z$  533.1551  $[\text{M}+\text{H}]^+$ , Found 533.1546.

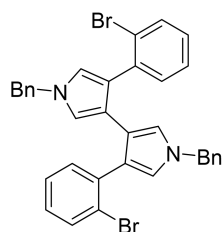

4o

**1,1'-dibenzyl-4,4'-bis(2-bromophenyl)-1H,1'H-3,3'-bipyrrole 4o.** The product was purified by flash column chromatography on silica gel (height 18 cm, width 1.5 cm, eluent: petroleum ether/ethyl acetate, gradient: 100:0 to 50:1) as a yellow oil (63%, 78.1 mg).  $R_f$  (petroleum ether/ethyl acetate = 50:1): 0.28.  $^1\text{H NMR}$  (400 MHz,  $\text{CDCl}_3$ )  $\delta$  7.49 – 7.42 (m, 2H), 7.34 – 7.22 (m, 6H), 7.21 – 7.14 (m, 2H), 7.14 – 7.03 (m, 6H), 7.01 – 6.91 (m, 2H), 6.74 – 6.63 (m, 2H), 6.31 – 6.20 (m, 2H), 4.95 (s, 4H).  $^{13}\text{C NMR}$  (101 MHz,  $\text{CDCl}_3$ )  $\delta$  138.30, 137.39, 132.61, 128.61, 127.46, 127.30, 126.82, 126.75, 124.41, 122.34, 121.13, 119.46, 117.73, 53.31. **HRMS** (ESI) calcd for  $\text{C}_{34}\text{H}_{27}\text{Br}_2\text{N}_2^+$   $m/z$  621.0541  $[\text{M}+\text{H}]^+$ , Found 621.0545.

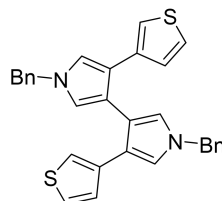

4p

**1,1'-dibenzyl-4,4'-di(thiophen-3-yl)-1H,1'H-3,3'-bipyrrole 4p.** The product was purified by flash column chromatography on silica gel (height 18 cm, width 1.5 cm, eluent: petroleum ether/ethyl acetate, gradient: 100:0 to 50:1) as a yellow oil (72%, 68.7 mg).  $R_f$  (petroleum ether/ethyl acetate = 50:1): 0.25.  $^1\text{H NMR}$  (400 MHz,  $\text{CDCl}_3$ )  $\delta$  7.27 – 7.13 (m, 6H), 7.09 – 7.02 (m, 4H), 7.02 – 6.93 (m, 4H), 6.86 – 6.75 (m, 4H),

6.48 (d,  $J = 2.4$  Hz, 2H), 4.91 (s, 4H).  $^{13}\text{C}$  NMR (101 MHz,  $\text{CDCl}_3$ )  $\delta$  138.14, 136.47, 128.79, 127.74, 127.06, 127.03, 124.20, 122.26, 120.79, 118.91, 117.95, 116.53, 53.48. **HRMS** (ESI) calcd for  $\text{C}_{30}\text{H}_{25}\text{S}_2\text{N}_2^+$   $m/z$  477.1459  $[\text{M}+\text{H}]^+$ , Found 477.1452.

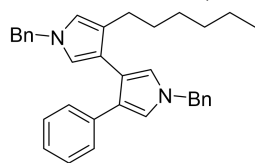

**4q**

**1,1'-dibenzyl-4-hexyl-4'-phenyl-1H,1'H-3,3'-bipyrrole 4q** The product was purified by flash column chromatography on silica gel (height 18 cm, width 1.5 cm, eluent: petroleum ether/ethyl acetate, gradient: 100:0 to 20:1) as a yellow oil (75%, 70.8 mg).  $R_f$  (petroleum ether/ethyl acetate = 20:1): 0.52.  $^1\text{H}$  NMR (400 MHz,  $\text{CDCl}_3$ )  $\delta$  7.36 – 7.28 (m, 8H), 7.23 – 7.18 (m, 4H), 7.13 – 7.07 (m, 3H), 6.84 (d,  $J = 2.4$  Hz, 1H), 6.65 (d,  $J = 2.4$  Hz, 1H), 6.44 (s, 2H), 5.09 (s, 2H), 4.96 (s, 2H), 2.25 (t,  $J = 8.0$  Hz, 2H), 1.44 – 1.35 (m, 2H), 1.24 – 1.16 (m, 6H), 0.84 (t,  $J = 6.8$  Hz, 3H).  $^{13}\text{C}$  NMR (101 MHz,  $\text{CDCl}_3$ )  $\delta$  138.85, 138.03, 136.67, 128.67, 128.51, 127.86, 127.61, 127.43, 127.29, 127.13, 126.71, 124.99, 124.34, 124.24, 121.11, 120.30, 119.33, 118.43, 117.38, 116.91, 53.43, 53.11, 31.68, 30.32, 29.29, 25.83, 22.63, 14.10. **HRMS** (ESI) calcd for  $\text{C}_{34}\text{H}_{37}\text{N}_2^+$   $m/z$  473.2957  $[\text{M}+\text{H}]^+$ , Found 473.2951.

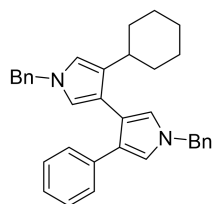

**4r**

**1,1'-dibenzyl-4-cyclohexyl-4'-phenyl-1H,1'H-3,3'-bipyrrole 4r.** The product was purified by flash column chromatography on silica gel (height 18 cm, width 1.5 cm, eluent: petroleum ether/ethyl acetate, gradient: 100:0 to 20:1) as a yellow oil (72%, 67.7 mg).  $R_f$  (petroleum ether/ethyl acetate = 50:1): 0.31.  $^1\text{H}$  NMR (400 MHz,  $\text{CDCl}_3$ )  $\delta$  7.43 – 7.13 (m, 12H), 7.13 – 7.00 (m, 3H), 6.83 (d,  $J = 2.4$  Hz, 1H), 6.64 (d,  $J = 2.0$  Hz, 1H), 6.48 – 6.29 (m, 2H), 5.07 (s, 2H), 4.93 (s, 2H), 2.41 – 2.29 (m, 1H), 1.84 – 1.71 (m, 2H), 1.68 – 1.54 (m, 3H), 1.23 – 1.04 (m, 5H).  $^{13}\text{C}$  NMR (101 MHz,  $\text{CDCl}_3$ )  $\delta$  138.83, 138.23, 136.58, 130.45, 128.66, 128.47, 127.82, 127.54, 127.43, 127.24, 126.88, 126.66, 124.93, 124.42, 121.22, 120.40, 119.28, 117.03, 116.83, 116.56, 53.35, 53.12, 35.26, 34.56, 26.94, 26.42. **HRMS** (ESI) calcd for  $\text{C}_{34}\text{H}_{35}\text{N}_2^+$   $m/z$  471.2800  $[\text{M}+\text{H}]^+$ , Found 471.2792.

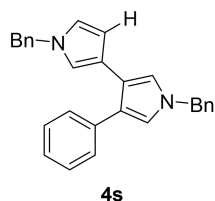

**1,1'-dibenzyl-4-phenyl-1H,1'H-3,3'-bipyrrole 4s.** The product was purified by flash column chromatography on silica gel (height 18 cm, width 1.5 cm, eluent: petroleum ether/ethyl acetate, gradient: 100:0 to 20:1) as a yellow oil (78%, 71.8 mg).  $R_f$  (petroleum ether/ethyl acetate = 20:1): 0.42.  $^1\text{H NMR}$  (300 MHz,  $\text{CDCl}_3$ )  $\delta$  7.50 – 7.31 (m, 10H), 7.27 – 7.12 (m, 5H), 6.78 (s, 2H), 6.63 (s, 1H), 6.55 (s, 1H), 6.17 (s, 1H), 5.10 (s, 2H), 5.01 (s, 2H).  $^{13}\text{C NMR}$  (75 MHz,  $\text{CDCl}_3$ )  $\delta$  138.44, 137.83, 136.64, 128.76, 128.63, 128.57, 127.91, 127.75, 127.49, 127.40, 126.92, 125.48, 123.41, 120.82, 120.26, 119.44, 118.73, 118.53, 117.98, 108.67, 53.49, 53.30. **HRMS** (ESI) calcd for  $\text{C}_{28}\text{H}_{25}\text{N}_2^+$   $m/z$  389.2018  $[\text{M}+\text{H}]^+$ , Found 389.2015.

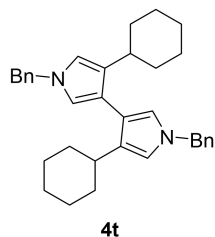

**1,1'-dibenzyl-4,4'-dicyclohexyl-1H,1'H-3,3'-bipyrrole 4t.** The product was purified by flash column chromatography on silica gel (height 18 cm, width 1.5 cm, eluent: petroleum ether/ethyl acetate, gradient: 100:0 to 20:1) as a yellow oil (78%, 71.8 mg).  $R_f$  (petroleum ether/ethyl acetate = 20:1): 0.51.  $^1\text{H NMR}$  (300 MHz,  $\text{CDCl}_3$ )  $\delta$  7.41 – 7.30 (m, 6H), 7.19 – 7.12 (m, 4H), 6.61 (d,  $J = 2.4$  Hz, 2H), 6.51 (d,  $J = 2.4$  Hz, 2H), 5.09 (s, 4H), 2.58 – 2.46 (m, 2H), 1.97 – 1.87 (m, 4H), 1.79 – 1.66 (m, 7H), 1.30 – 1.21 (m, 9H).  $^{13}\text{C NMR}$  (75 MHz,  $\text{CDCl}_3$ )  $\delta$  139.02, 130.38, 128.61, 127.33, 126.76, 119.82, 117.11, 116.84, 53.25, 35.28, 34.88, 27.06, 26.54. **HRMS** (ESI) calcd for  $\text{C}_{34}\text{H}_{40}\text{N}_2\text{Na}^+$   $m/z$  499.3084  $[\text{M}+\text{H}]^+$ , Found 499.3092.

## 9. Procedure for the synthesis of derivative 5.

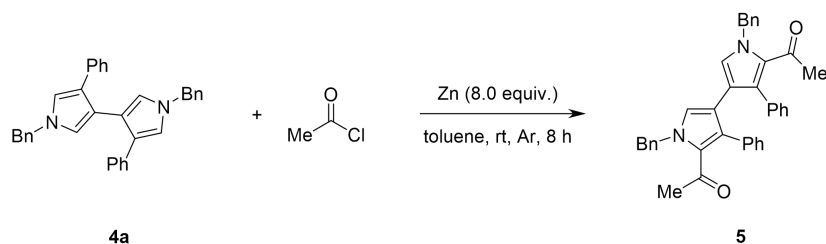

An oven-dried 25 mL Schlenk tube equipped with a stirring bar was charged with **4a** (0.2 mmol, 1.0 equiv.), acetyl chloride (94.2 mg, 1.2 mmol, 6.0 equiv.), zinc powder (104.6 mg, 1.6 mmol, 8.0 equiv.), in toluene (2 mL) under Ar, at room temperature for 5 h. After reaction completed, the volatiles were removed under reduced pressure. The residue was purified by flash column chromatography on silica gel to afford the corresponding product **5**<sup>[2]</sup>.



**1,1'-(1,1'-dibenzyl-4,4'-diphenyl-1H,1'H-[3,3'-bipyrrole]-5,5'-diyl)bis(ethan-1-one) 5.** The product was purified by flash column chromatography on silica gel (height 18 cm, width 1.5 cm, eluent: petroleum ether/ethyl acetate, gradient: 100:0 to 20:1) as a white solid (37%, 40 mg).  $R_f$  (petroleum ether/ethyl acetate = 50:1): 0.38.  $^1\text{H NMR}$  (400 MHz,  $\text{CDCl}_3$ )  $\delta$  7.37 – 7.32 (m, 6H), 7.26 – 7.19 (m, 10H), 6.95 – 6.86 (m, 4H), 6.15 (s, 2H), 5.30 (s, 4H), 1.77 (s, 6H).  $^{13}\text{C NMR}$  (75 MHz,  $\text{CDCl}_3$ )  $\delta$  190.19, 137.99, 136.83, 133.53, 130.61, 128.46, 128.43, 128.11, 127.89, 127.49, 127.35, 127.30, 116.66, 53.03, 30.32. **HRMS** (ESI) calcd for  $\text{C}_{38}\text{H}_{33}\text{N}_2\text{O}_2^+$   $m/z$  549.2542  $[\text{M}+\text{H}]^+$ , Found 549.2545.

## 10. General procedure for the synthesis of derivatives 6.

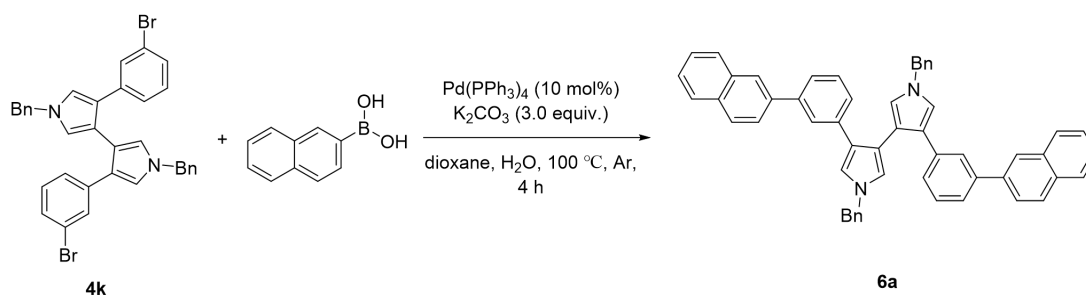

An oven-dried 25 mL Schlenk tube equipped with a stirring bar was charged with **4k** (124.0 mg, 0.2 mmol, 1.0 equiv.), 2-naphthaleneboronic acid (75.7 mg, 0.44 mmol, 2.2 equiv.),  $\text{Pd(PPh}_3)_4$  (23.1 mg, 0.02 mmol, 10 mol%) and  $\text{K}_2\text{CO}_3$  (82.9 mg, 0.6 mmol, 3.0 equiv.) in dioxane/ $\text{H}_2\text{O}$  (1:1, 2 mL) under Ar. The resulting reaction mixture was stirred at 100 °C for 4 h. After reaction completed, the volatiles were removed under reduced pressure. The residue was purified by flash column chromatography on silica gel (height 20 cm, width 3.5 cm, eluent: petroleum ether) to afford the corresponding product **6a**.

**1,1'-dibenzyl-4,4'-bis(3-(naphthalen-2-yl)phenyl)-1H,1'H-3,3'-bipyrrole 6a.** The product was purified by flash column chromatography on silica gel (height 18 cm, width 1.5 cm, eluent: petroleum ether/ethyl acetate, gradient: 100:0 to 20:1) as a yellow oil (79%, 113.2 mg).  $R_f$  (petroleum ether/ethyl acetate = 20:1): 0.37.  $^1\text{H NMR}$  (400 MHz,  $\text{CDCl}_3$ )  $\delta$  7.82 – 7.70 (m, 6H), 7.70 – 7.62 (m, 4H), 7.55 – 7.49 (m, 2H), 7.44 – 7.36 (m, 4H), 7.35 – 7.31 (m, 2H), 7.27 – 7.23 (m, 2H), 7.22 – 7.09 (m, 12H), 6.95 (d,  $J$  = 2.4 Hz, 2H), 6.69 (d,  $J$  = 2.4 Hz, 2H), 5.05 (s, 4H).  $^{13}\text{C NMR}$  (101 MHz,  $\text{CDCl}_3$ )  $\delta$  140.29, 139.03, 137.96, 136.83, 133.72, 132.51, 128.76, 128.36, 128.23, 128.14, 127.67, 127.60, 127.08, 126.42, 126.38, 126.06, 125.73, 125.66, 125.57, 124.90, 124.01, 121.93, 119.50, 116.91, 53.55. **HRMS** (ESI) calcd for  $\text{C}_{54}\text{H}_{41}\text{N}_2^+$   $m/z$  717.3270  $[\text{M}+\text{H}]^+$ , Found 717.3273.

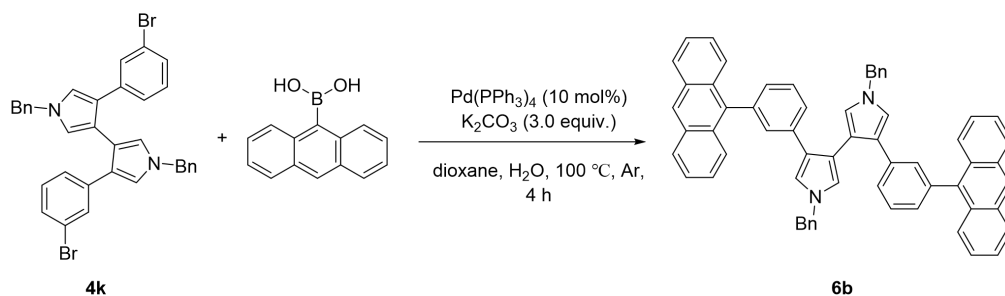

An oven-dried 25 mL Schlenk tube equipped with a stirring bar was charged with **4k** (124.0 mg, 0.20 mmol, 1.0 equiv.), 9-anthraceneboronic acid (75.7 mg, 0.44 mmol, 2.2 equiv.), Pd(PPh<sub>3</sub>)<sub>4</sub> (23.1 mg, 0.02 mmol, 10 mol%) and K<sub>2</sub>CO<sub>3</sub> (82.9 mg, 0.6 mmol, 3.0 equiv.) in dioxane/H<sub>2</sub>O (1:1, 2 mL) under Ar. The resulting reaction mixture was stirred at 100 °C for 4 h. After reaction completed, the volatiles were removed under reduced pressure. The residue was purified by flash column chromatography on silica gel (height 20 cm, width 3.5 cm, eluent: petroleum ether) to afford product **6b**.

**4,4'-bis(3-(anthracen-9-yl)phenyl)-1,1'-dibenzyl-1H,1'H-3,3'-bipyrrole 6b.** The product was purified by flash column chromatography on silica gel (height 18 cm, width 1.5 cm, eluent: petroleum ether/ethyl acetate, gradient: 100:0 to 20:1) as a yellow oil (73%, 119.1 mg). *R<sub>f</sub>* (petroleum ether/ethyl acetate = 20:1): 0.33. <sup>1</sup>H NMR (400 MHz, CDCl<sub>3</sub>) δ 8.41 (s, 2H), 7.95 (d, *J* = 8.8 Hz, 4H), 7.62 (d, *J* = 8.8 Hz, 4H), 7.44 – 7.39 (m, 4H), 7.35 – 7.30 (m, 6H), 7.15 – 7.05 (m, 12H), 6.95 – 6.90 (m, 4H), 6.77 (d, *J* = 2.4 Hz, 2H), 6.58 (d, *J* = 2.4 Hz, 2H), 4.85 (s, 4H). <sup>13</sup>C NMR (101 MHz, CDCl<sub>3</sub>) δ 138.19, 137.86, 137.82, 136.48, 131.43, 130.28, 129.73, 128.66, 128.16, 127.93, 127.86, 127.60, 127.48, 127.06, 126.39, 126.20, 125.11, 125.08, 124.25, 121.69, 119.95, 116.85, 53.42. HRMS (ESI) calcd for C<sub>62</sub>H<sub>45</sub>N<sub>2</sub><sup>+</sup> *m/z* 817.3583 [M+H]<sup>+</sup>, Found 817.3574.

## 11. General procedure for the synthesis of derivatives 7, 8, 9.

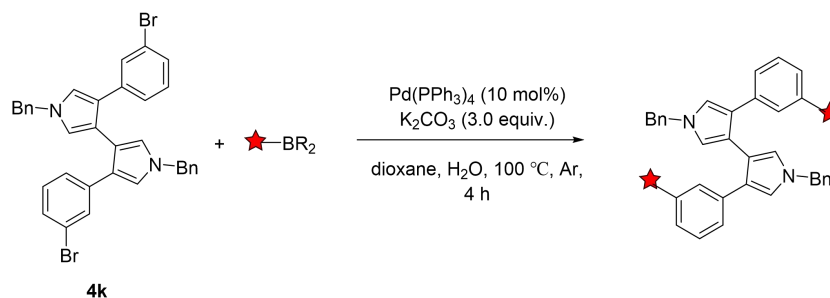

An oven-dried 25 mL Schlenk tube equipped with a stirring bar was charged with **4k** (124.0 mg, 0.2 mmol, 1.0 equiv.), borate ester<sup>[3,4]</sup> (0.44 mmol, 2.2 equiv.), Pd(PPh<sub>3</sub>)<sub>4</sub> (23.1 mg, 0.02 mmol, 10 mol%) and K<sub>2</sub>CO<sub>3</sub> (82.9 mg, 0.6 mmol, 3.0 equiv.) in dioxane/H<sub>2</sub>O (1:1, 2 mL) under Ar. The resulting reaction mixture was stirred at 100 °C for 4 h. After reaction completed, the volatiles were removed under reduced pressure. The residue was purified by flash column chromatography on silica gel

(height 20 cm, width 3.5 cm, eluent: petroleum ether) to afford the corresponding product **7**, **8**, **9**.

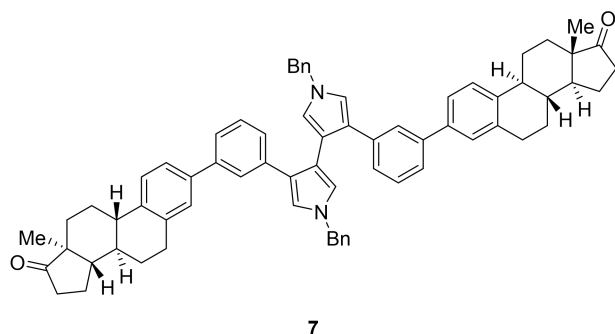

**7**

**(8R,8'R,9S,9'S,13S,13'S,14S,14'S)-3,3'-((1,1'-dibenzyl-1H,1'H-[3,3'-bipyrrole]-4,4'-diyl)bis(3,1-phenylene))bis(13-methyl-6,7,8,9,11,12,13,14,15,16-decahydro-17H-cyclopenta[a]phenanthren-17-one) 7.** The product was purified by flash column chromatography on silica gel (height 18 cm, width 1.5 cm, eluent: petroleum ether/ethyl acetate, gradient: 100:0 to 20:1) as a yellow oil (74%, 143.3 mg).  $R_f$  (petroleum ether/ethyl acetate = 20:1): 0.33.  $^1\text{H NMR}$  (400 MHz,  $\text{CDCl}_3$ )  $\delta$  7.54 (s, 2H), 7.28 – 7.22 (m, 14H), 7.18 – 7.11 (m, 8H), 6.93 (d,  $J$  = 2.4 Hz, 2H), 6.66 (d,  $J$  = 2.4 Hz, 2H), 5.08 (s, 4H), 2.93 – 2.85 (m, 4H), 2.57 – 2.49 (m, 2H), 2.38 – 2.30 (m, 2H), 2.20 – 1.98 (m, 10H), 1.66 – 1.49 (m, 12H), 0.93 (s, 6H).  $^{13}\text{C NMR}$  (101 MHz,  $\text{CDCl}_3$ )  $\delta$  220.93, 140.17, 139.23, 138.34, 137.99, 136.56, 136.48, 128.72, 128.16, 127.69, 127.57, 127.00, 125.99, 125.86, 125.59, 124.83, 124.46, 123.58, 121.92, 119.36, 116.75, 53.48, 50.54, 48.03, 44.41, 38.25, 35.89, 31.66, 29.52, 26.63, 25.82, 21.64, 13.89. **HRMS** (ESI) calcd for  $\text{C}_{70}\text{H}_{68}\text{N}_2\text{O}_2\text{Na}^+$   $m/z$  991.5178  $[\text{M}+\text{Na}]^+$ , Found 991.5179.

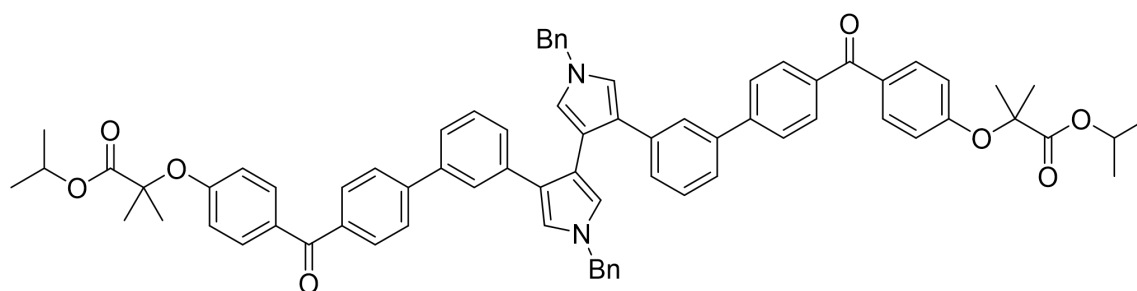

**8**

**Diisopropyl 2,2'-(((3',3'''-(1,1'-dibenzyl-1H,1'H-[3,3'-bipyrrole]-4,4'-diyl)bis([1'',1'''-biphenyl]-4-carbonyl))bis(4,1-phenylene))bis(oxy))bis(2-methylpropanoate) 8.** The product was purified by flash column chromatography on silica gel (height 18 cm, width 1.5 cm, eluent: petroleum ether/ethyl acetate, gradient: 20 to 5:1) as a yellow oil (79%, 175.8 mg).  $R_f$  (petroleum ether/ethyl acetate = 5:1): 0.18.  $^1\text{H NMR}$  (400 MHz,  $\text{CDCl}_3$ )  $\delta$  7.81 – 7.68 (m, 9H), 7.53 (t,  $J$  = 1.6 Hz, 2H), 7.45 (d,  $J$  = 8.0 Hz, 4H), 7.26

– 7.13 (m, 15H), 6.95 – 6.86 (m, 6H), 6.70 (d,  $J = 2.4$  Hz, 2H), 5.13 – 5.02 (m, 6H), 1.67 (s, 12H), 1.20 (d,  $J = 6.4$  Hz, 12H).  $^{13}\text{C}$  NMR (101 MHz,  $\text{CDCl}_3$ )  $\delta$  195.12, 173.07, 159.35, 145.16, 138.99, 137.70, 136.73, 136.19, 131.87, 130.74, 130.19, 128.65, 128.29, 127.63, 126.94, 126.78, 126.53, 126.00, 124.37, 123.59, 121.68, 119.32, 117.10, 116.63, 79.25, 69.21, 53.40, 25.28, 21.42. HRMS (ESI) calcd for  $\text{C}_{74}\text{H}_{69}\text{N}_2\text{O}_8^+$   $m/z$  1113.5054  $[\text{M}+\text{H}]^+$ , Found 1113.5047.

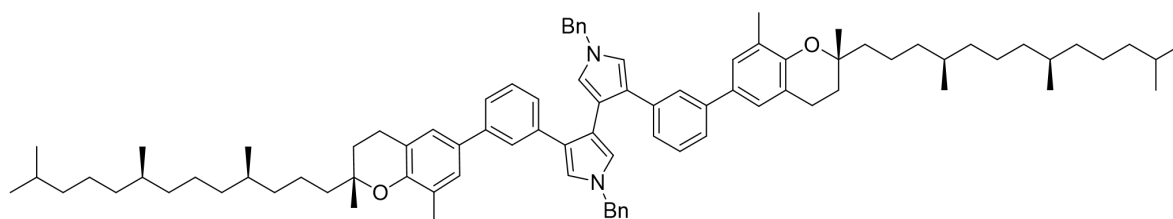

9

**1,1'-dibenzyl-4,4'-bis(3-((R)-2,8-dimethyl-2-((4R,8R)-4,8,12-trimethyltridecyl)chroman-6-yl)phenyl)-1H,1'H-3,3'-bipyrrole 9.** The product was purified by flash column chromatography on silica gel (height 18 cm, width 1.5 cm, eluent: petroleum ether/ethyl acetate, gradient: 100:1 to 50:1) as a yellow oil (83%, 204.5 mg).  $R_f$  (petroleum ether/ethyl acetate = 50:1): 0.43.  $^1\text{H}$  NMR (400 MHz,  $\text{CDCl}_3$ )  $\delta$  7.61 (s, 1H), 7.36 – 7.25 (m, 10H), 7.23 – 7.13 (m, 9H), 7.11 – 7.04 (m, 2H), 7.00 (d,  $J = 2.4$  Hz, 2H), 6.69 (d,  $J = 2.4$  Hz, 2H), 5.10 (s, 4H), 2.89 – 2.69 (m, 4H), 2.33 – 2.20 (m, 6H), 1.94 – 1.78 (m, 4H), 1.71 – 1.17 (m, 48H), 0.99 – 0.90 (m, 25H).  $^{13}\text{C}$  NMR (101 MHz,  $\text{CDCl}_3$ )  $\delta$  151.47, 140.56, 137.99, 136.38, 132.29, 128.61, 127.97, 127.48, 127.10, 126.91, 126.11, 125.58, 125.46, 125.28, 124.97, 123.27, 121.85, 120.27, 119.22, 116.76, 76.04, 53.38, 40.32, 39.35, 37.47, 37.44, 37.27, 32.78, 32.70, 31.25, 27.96, 24.79, 24.44, 24.27, 22.72, 22.63, 22.41, 21.01, 19.76, 19.65, 16.20. HRMS (ESI) calcd for  $\text{C}_{88}\text{H}_{116}\text{N}_2\text{O}_2\text{Na}^+$   $m/z$  1255.8935  $[\text{M}+\text{Na}]^+$ , Found 1255.8921.

## 12. General procedures for control experiments.

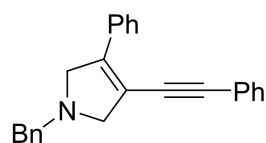

10

**benzyl-3-phenyl-4-(phenylethynyl)-2,5-dihydro-1H-pyrrole 10.** The product was purified by flash column chromatography on silica gel (height 18 cm, width 1.5 cm, eluent: petroleum ether/ethyl acetate, gradient: 100:0 to 50:1) as a white solid (53%, 35.5 mg).  $R_f$  (petroleum ether/ethyl acetate = 50:1): 0.5.  $^1\text{H}$  NMR (400 MHz,  $\text{CDCl}_3$ )  $\delta$  7.81 (d,  $J = 7.6$  Hz, 2H), 7.48 – 7.42 (m, 2H), 7.42 – 7.37 (m, 2H), 7.37 – 7.25 (m, 9H), 3.98 (t,  $J = 4.0$  Hz, 2H), 3.85 (s, 2H), 3.81 (t,  $J = 4.0$  Hz, 2H).  $^{13}\text{C}$  NMR (101 MHz,  $\text{CDCl}_3$ )  $\delta$  142.32, 139.11, 134.16, 131.57, 128.78, 128.54, 128.48, 128.35,

128.28, 127.26, 126.78, 123.38, 115.65, 96.53, 85.51, 64.41, 61.84, 60.35, one carbon was overlapped. **HRMS** (ESI) calcd for  $C_{25}H_{22}N^+$   $m/z$  336.1752  $[M+H]^+$ , Found 336.1754.

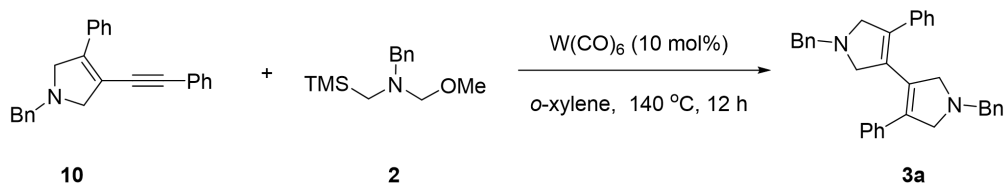

An oven-dried 25 mL schlenk tube equipped with a stirring bar was transferred into glovebox (through standard glovebox operation), where  $W(CO)_6$  (0.02 mmol, 7.0 mg, 0.1 equiv.) was added. The tube was then removed from glovebox and placed under Ar. Then derivatives **10** (0.2 mmol, 1.0 equiv.), *N*-(methoxymethyl)-*N*-(trimethylsilylmethyl)-benzylamine **2** (1.2 mmol, 6.0 equiv.), and *o*-xylene (2 mL) were added subsequently to the test tube under Ar. The resulting reaction mixture was stirred at 140 °C for 12 h. After reaction completed, the mixture was cooled down to room temperature, and the volatiles were removed under reduced pressure. The residue was then purified by flash column chromatography on silica gel to give the desired product **3a**.

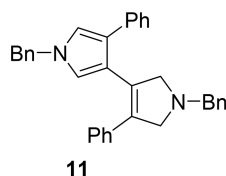

**1,1'-dibenzyl-4,4'-diphenyl-2,5-dihydro-1H,1'H-3,3'-bipyrrole 11.** The product was purified by flash column chromatography on silica gel (height 18 cm, width 1.5 cm, eluent: petroleum ether/ethyl acetate, gradient: 50:1 to 10:1) as a yellow oil (43%, 40.1 mg).  $R_f$  (petroleum ether/ethyl acetate = 10:1): 0.2.  **$^1H$  NMR** (400 MHz,  $CDCl_3$ )  $\delta$  7.40 (d,  $J$  = 7.2 Hz, 2H), 7.35 – 7.21 (m, 12H), 7.14 – 7.05 (m, 6H), 6.80 (d,  $J$  = 2.4 Hz, 1H), 6.49 (d,  $J$  = 2.4 Hz, 1H), 4.96 (s, 2H), 3.95 (t,  $J$  = 3.6 Hz, 2H), 3.82 (s, 2H), 3.67 (t,  $J$  = 4.0 Hz, 2H).  **$^{13}C$  NMR** (101 MHz,  $CDCl_3$ )  $\delta$  139.37, 137.80, 135.99, 135.81, 133.35, 130.65, 128.76, 128.75, 128.33, 127.82, 127.76, 127.29, 126.95, 126.91, 126.87, 126.54, 125.52, 124.30, 121.02, 119.83, 116.89, 65.58, 63.03, 60.51, 53.46, one carbon was overlapped. **HRMS** (ESI) calcd for  $C_{34}H_{31}N_2^+$   $m/z$  467.2487  $[M+H]^+$ , Found 467.2491.

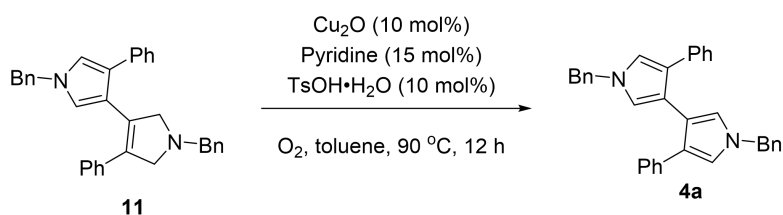

An oven-dried 25 mL reaction tube equipped with a stirring bar was charged with

derivatives **11** (0.20 mmol, 1.0 equiv.), Cu<sub>2</sub>O (2.9 mg, 0.02 mmol, 0.1 equiv.), pyridine (2.4 mg, 0.03 mmol, 0.15 equiv.), TsOH•H<sub>2</sub>O (3.4 mg, 0.02 mmol, 0.1 equiv.) and toluene (2 mL). The tube was evacuated and filled with 1 atm O<sub>2</sub>, and stirred rigorously at 90 °C for 12 h. After reaction completed, the mixture was cooled down to room temperature, and the volatiles were removed under reduced pressure. The residue was purified by flash chromatography on silica gel to afford the corresponding products **4a**.

### 13. References.

- [1] W. Y. Yin, C. He, M. Chen, H. Zhang and A. W. Lei, Nickel-Catalyzed Oxidative Coupling Reactions of Two Different Terminal Alkynes Using O<sub>2</sub> as the Oxidant at Room Temperature: Facile Syntheses of Unsymmetric 1,3-Diynes, *Org. Lett.*, 2009, **11**, 709-712.
- [2] J. S. Yadav, B. V. S. Reddy, G. Kondaji, R. Srinivasa Rao and S. Praveen Kumar, Zinc-mediated acylation and sulfonation of pyrrole and its derivatives, *Tetrahedron Letters*, 2002, **43**, 8133-8135.
- [3] S. S. Zhang, X.-Y. Liu, Z. B. Chang, X. X. Qiao, H.-Y. Xiong and G. W. Zhang, The [3+2] Annulation of CF<sub>3</sub>-Ketimines by Re Catalysis: Access to CF<sub>3</sub>-Containing Amino Heterocycles and Polyamides, *iScience.*, 2020, **23**, 101705.
- [4] Y. L. Zhou, L. P. Qiu, J. Li and W. L. Xie, A General Copper Catalytic System for Suzuki–Miyaura Cross-Coupling of Unactivated Secondary and Primary Alkyl Halides with Arylborons, *J. Am. Chem. Soc.*, 2023, **145**, 28146-28155.

## 14. NMR spectra copies of the compounds 3.

$^1\text{H}$  NMR (400 MHz,  $\text{CDCl}_3$ ) spectrum of compound 3a

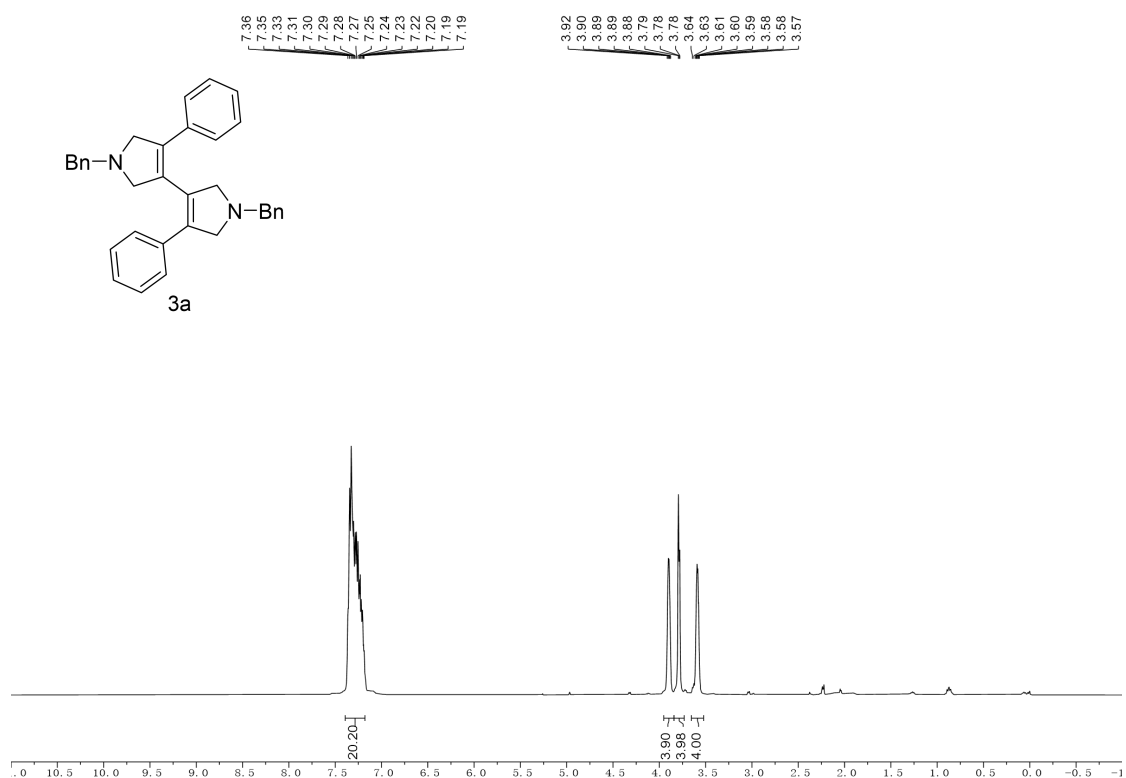

$^{13}\text{C}\{^1\text{H}\}$  NMR (101 MHz,  $\text{CDCl}_3$ ) spectrum of compound 3a

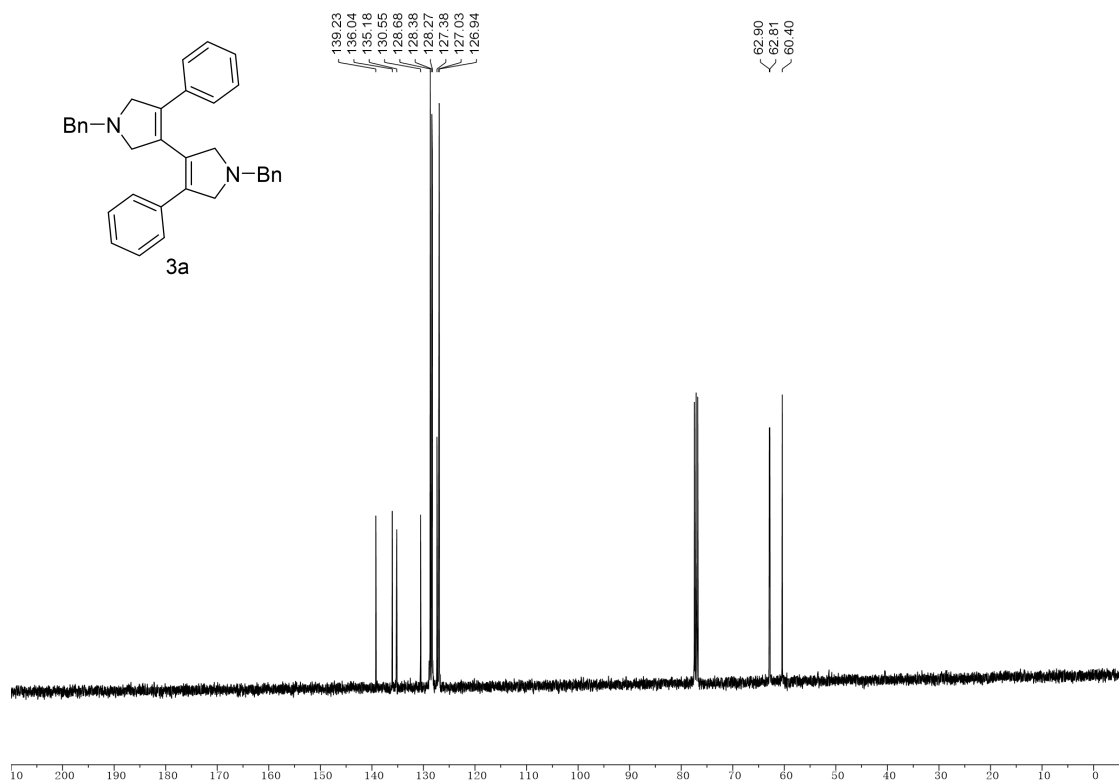

**$^1\text{H}$  NMR (400 MHz,  $\text{CDCl}_3$ ) spectrum of compound 3b:**

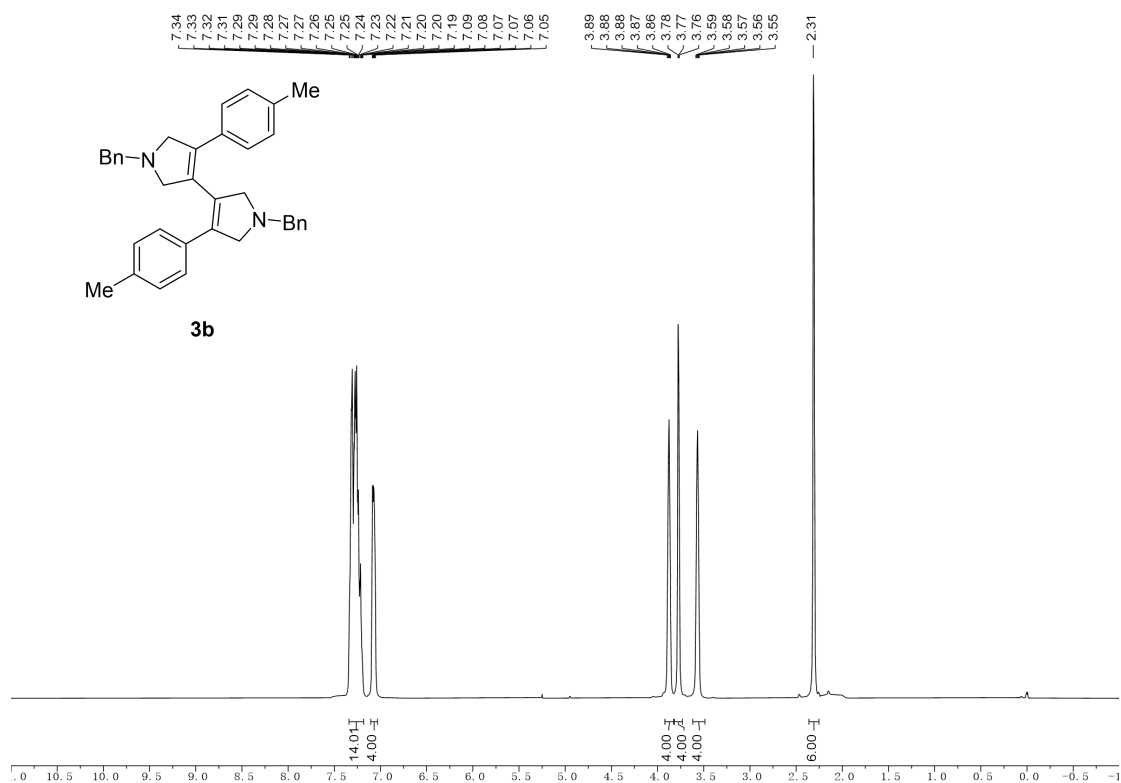

**$^{13}\text{C}\{^1\text{H}\}$  NMR (101 MHz,  $\text{CDCl}_3$ ) spectrum of compound 3b:**

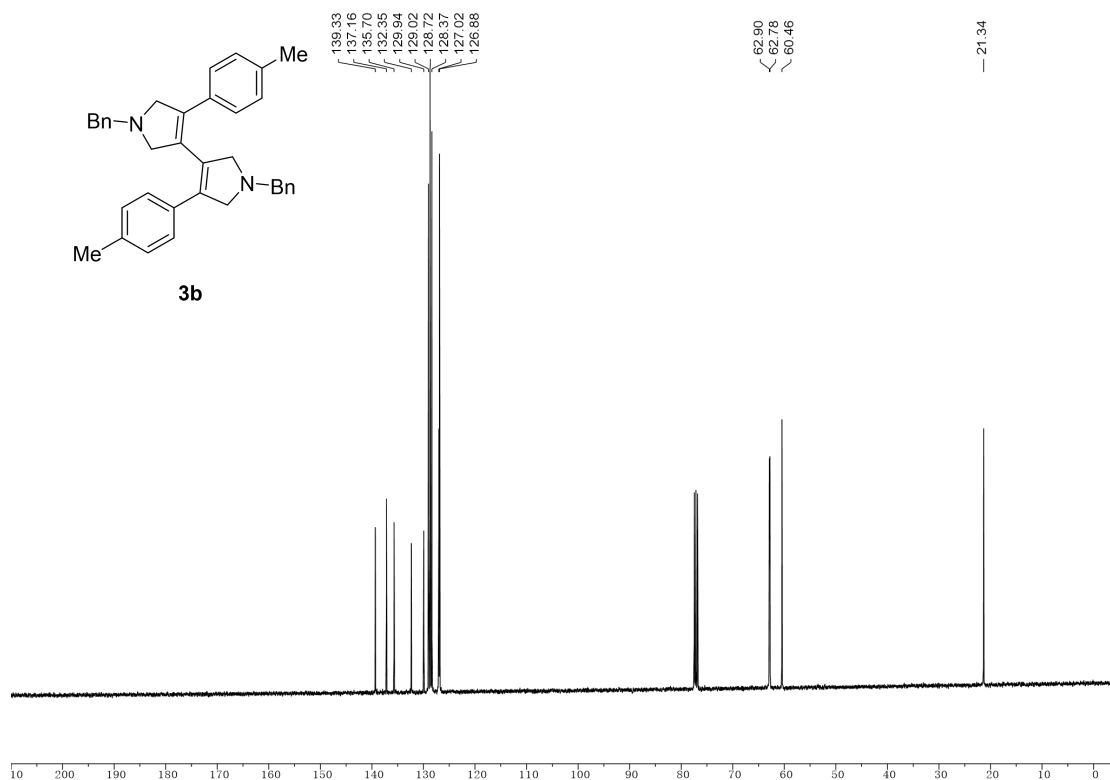



**$^1\text{H}$  NMR (400 MHz,  $\text{CDCl}_3$ ) spectrum of compound 3c:**

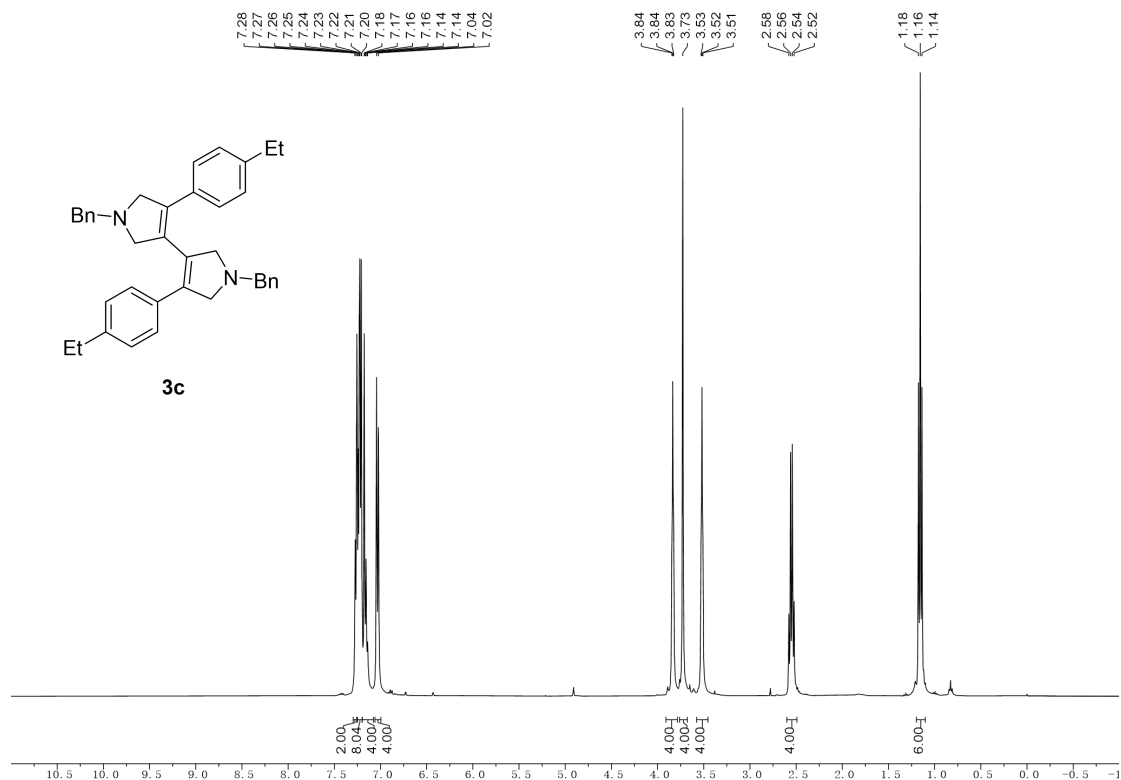

**$^{13}\text{C}\{^1\text{H}\}$  NMR (101 MHz,  $\text{CDCl}_3$ ) spectrum of compound 3c:**

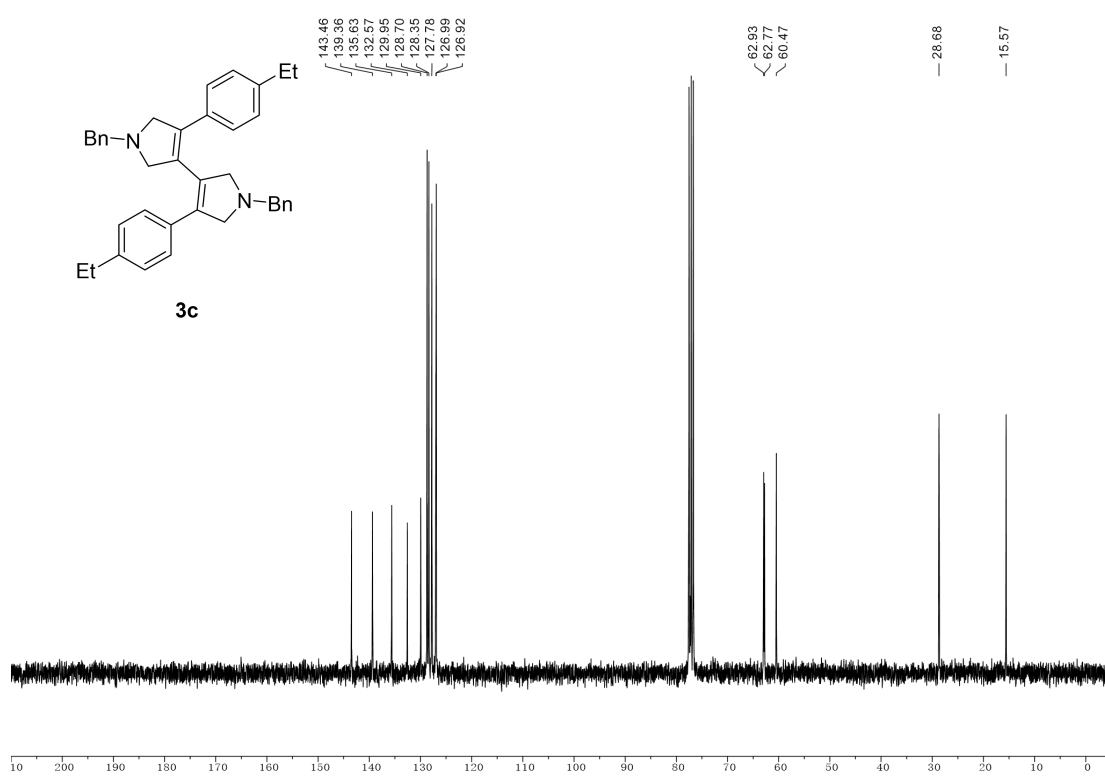

**$^1\text{H}$  NMR (400 MHz,  $\text{CDCl}_3$ ) spectrum of compound 3d:**

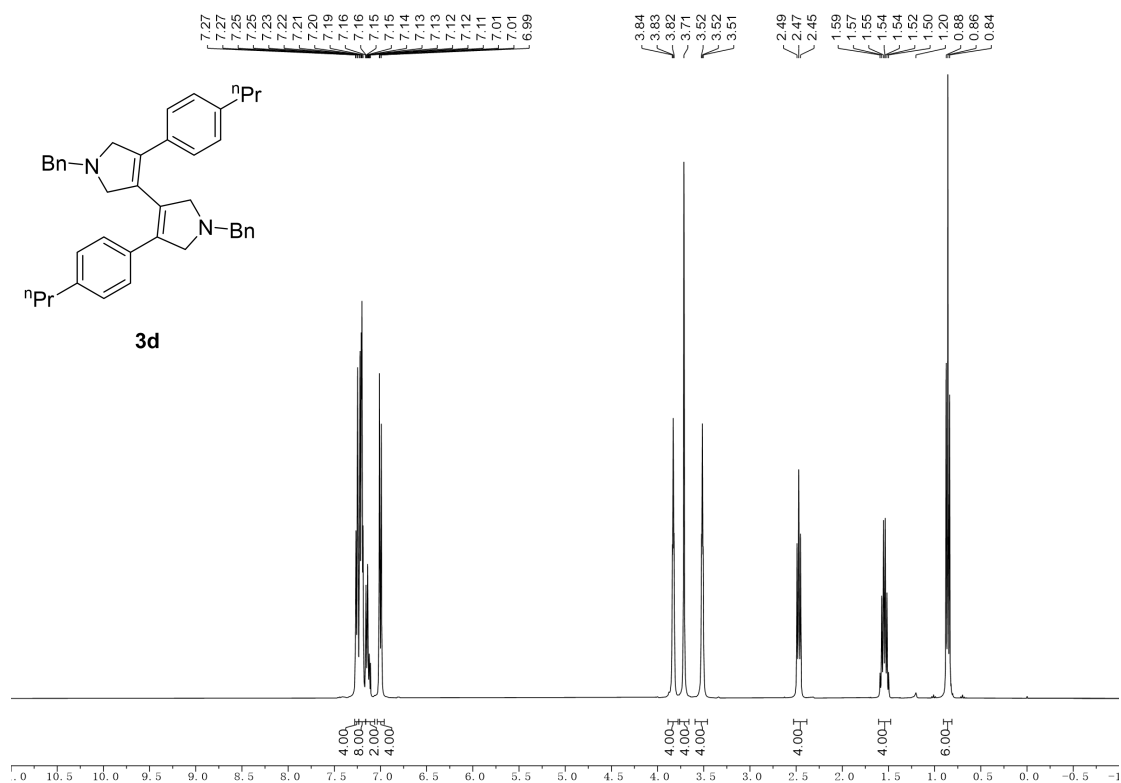

**$^{13}\text{C}\{^1\text{H}\}$  NMR (101 MHz,  $\text{CDCl}_3$ ) spectrum of compound 3d:**

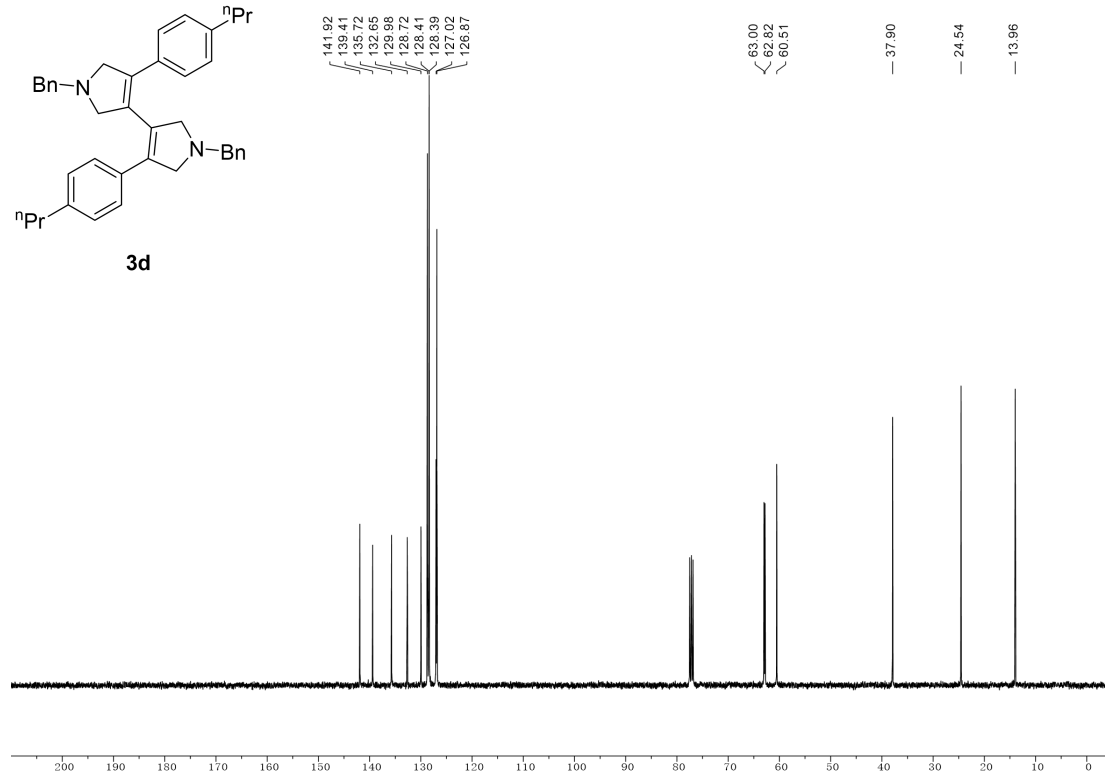

**$^1\text{H}$  NMR (400 MHz,  $\text{CDCl}_3$ ) spectrum of compound 3e:**

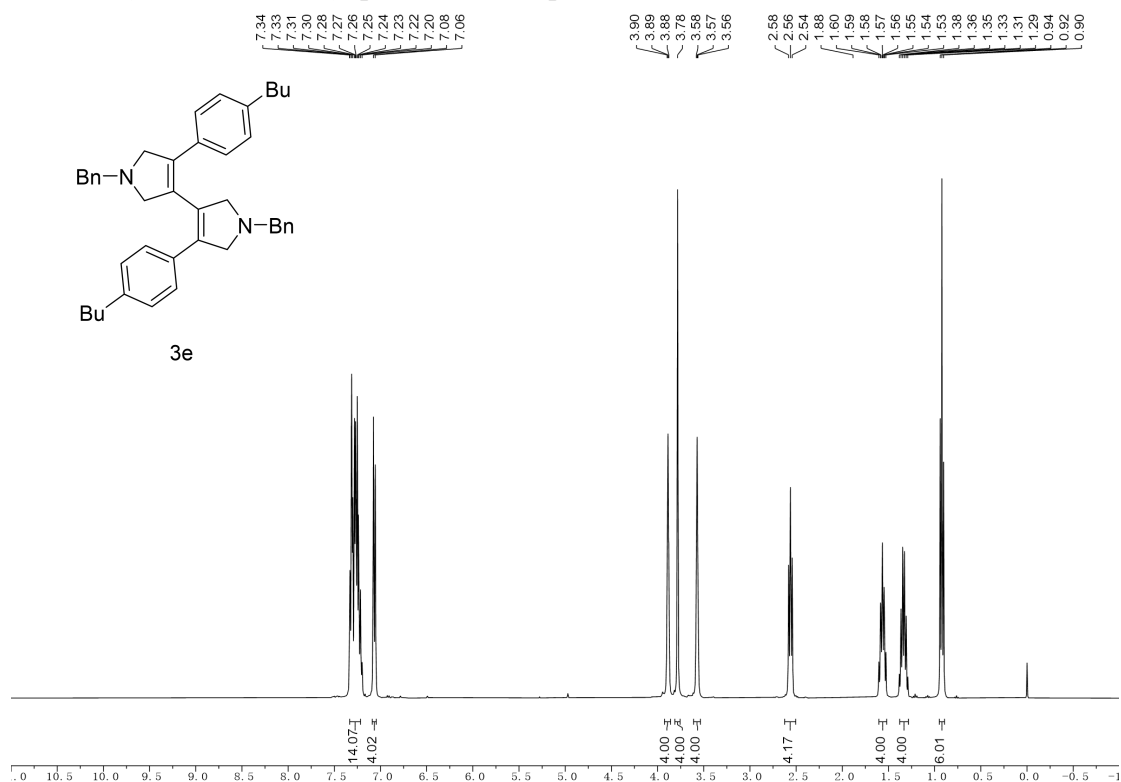

**$^{13}\text{C}\{^1\text{H}\}$  NMR (101 MHz,  $\text{CDCl}_3$ ) spectrum of compound 3e:**

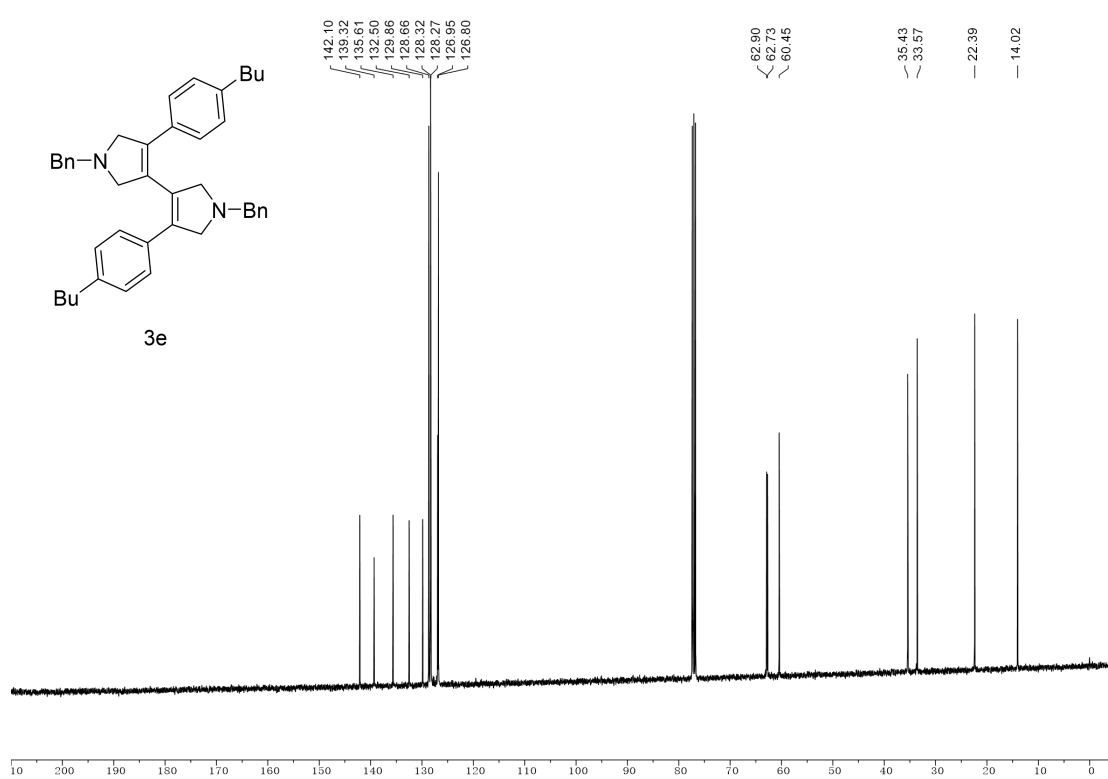

**$^1\text{H}$  NMR (400 MHz,  $\text{CDCl}_3$ ) spectrum of compound 3f:**

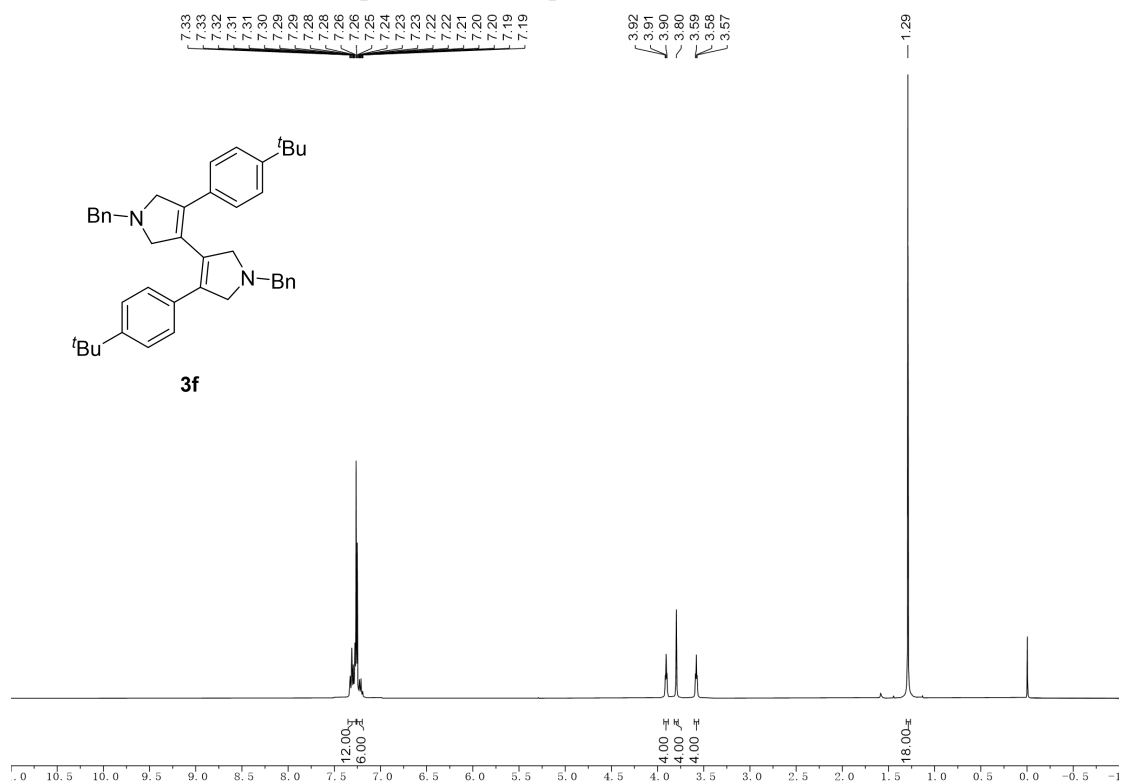

**$^{13}\text{C}\{^1\text{H}\}$  NMR (101 MHz,  $\text{CDCl}_3$ ) spectrum of compound 3f:**

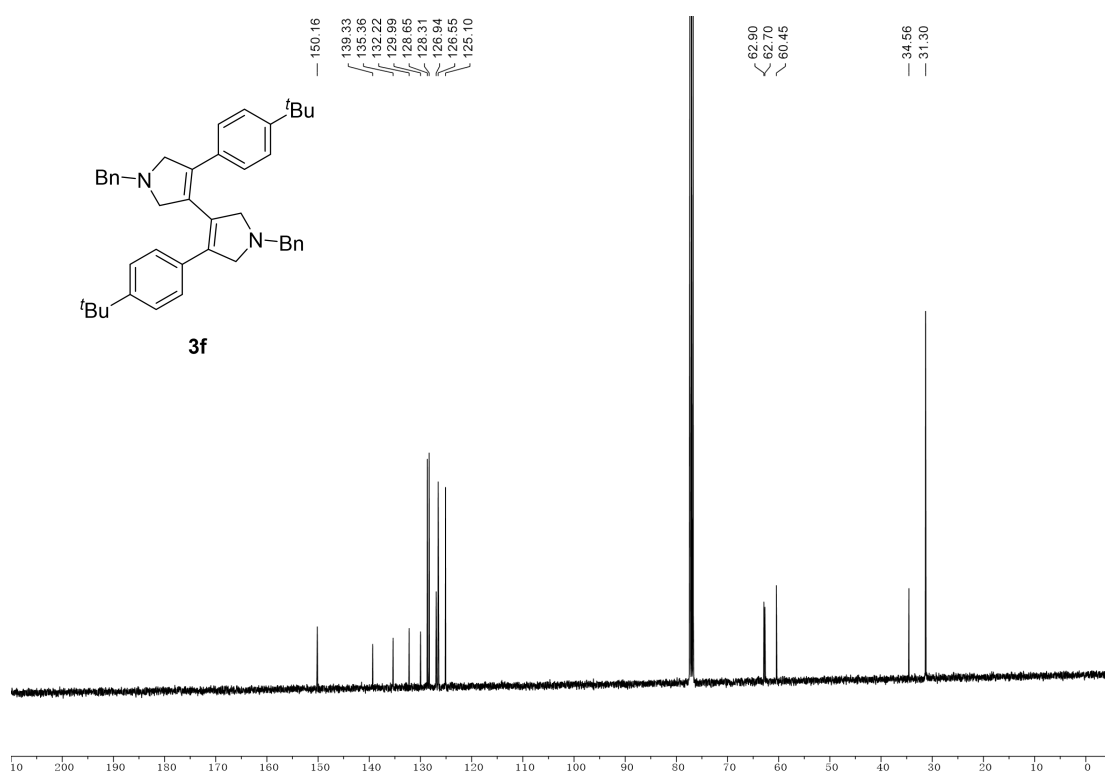

**$^1\text{H}$  NMR (400 MHz,  $\text{CDCl}_3$ ) spectrum of compound **3g**:**

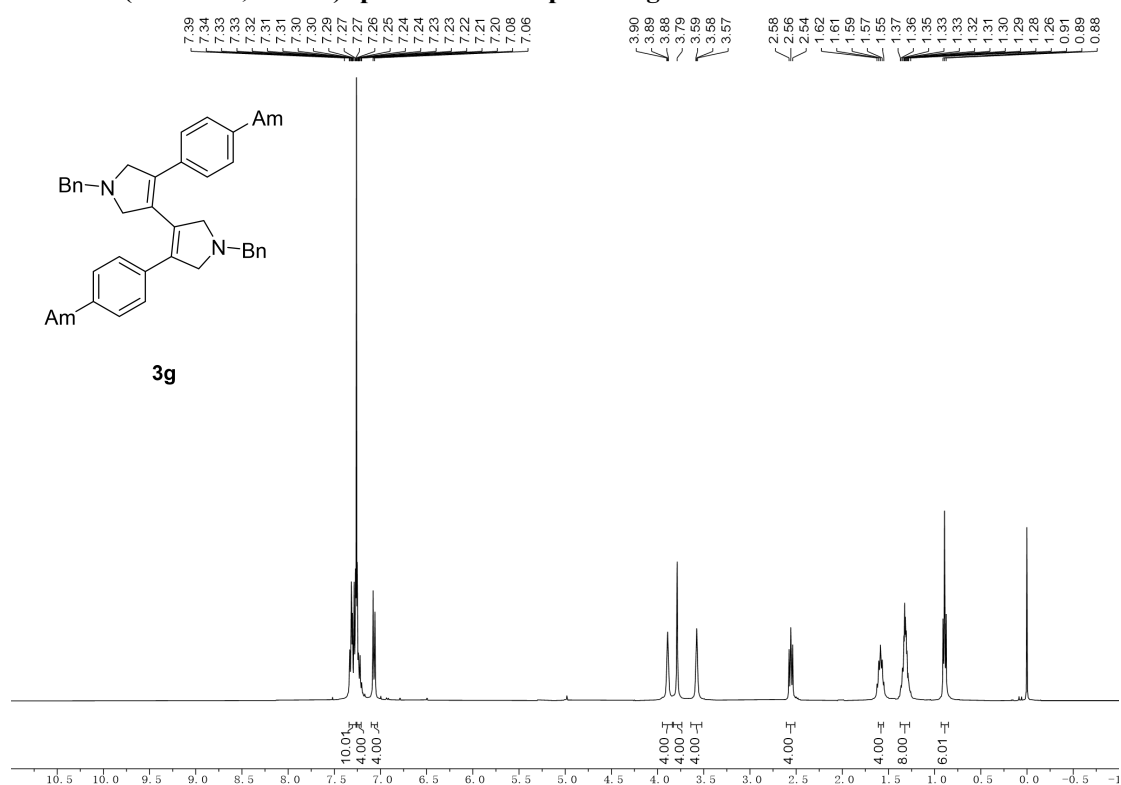

**$^{13}\text{C}\{^1\text{H}\}$  NMR (101 MHz,  $\text{CDCl}_3$ ) spectrum of compound **3g**:**

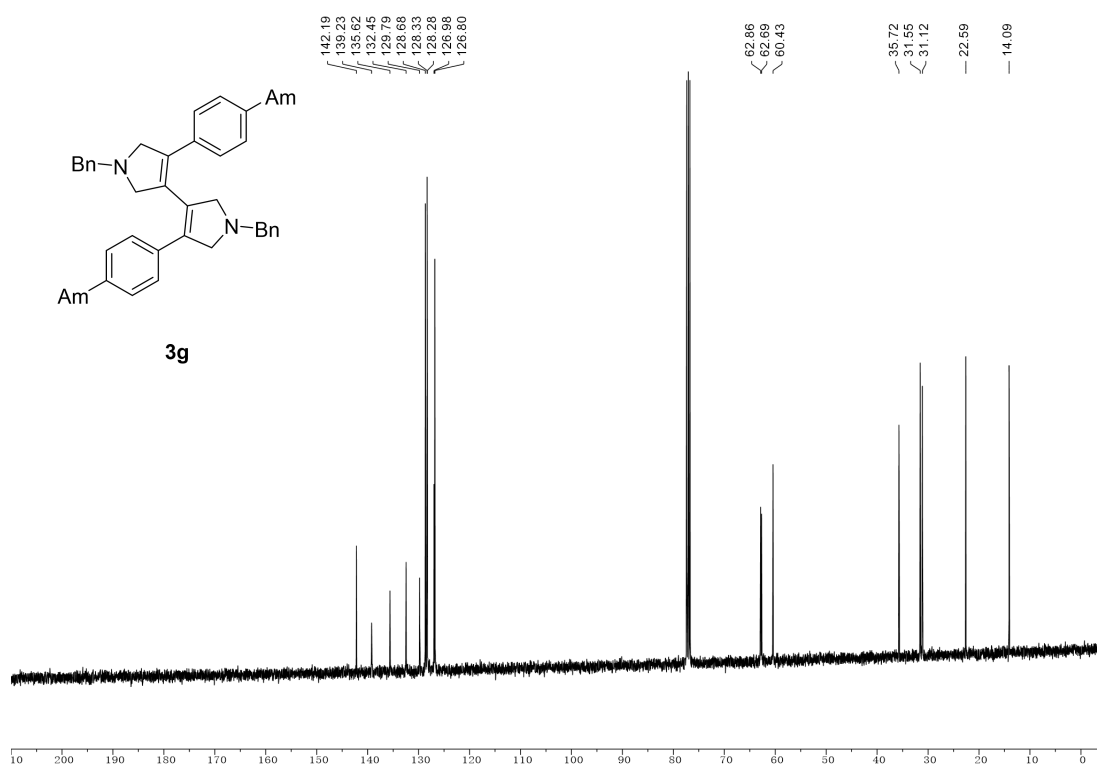

**$^1\text{H}$  NMR (400 MHz,  $\text{CDCl}_3$ ) spectra of compound 3h:**

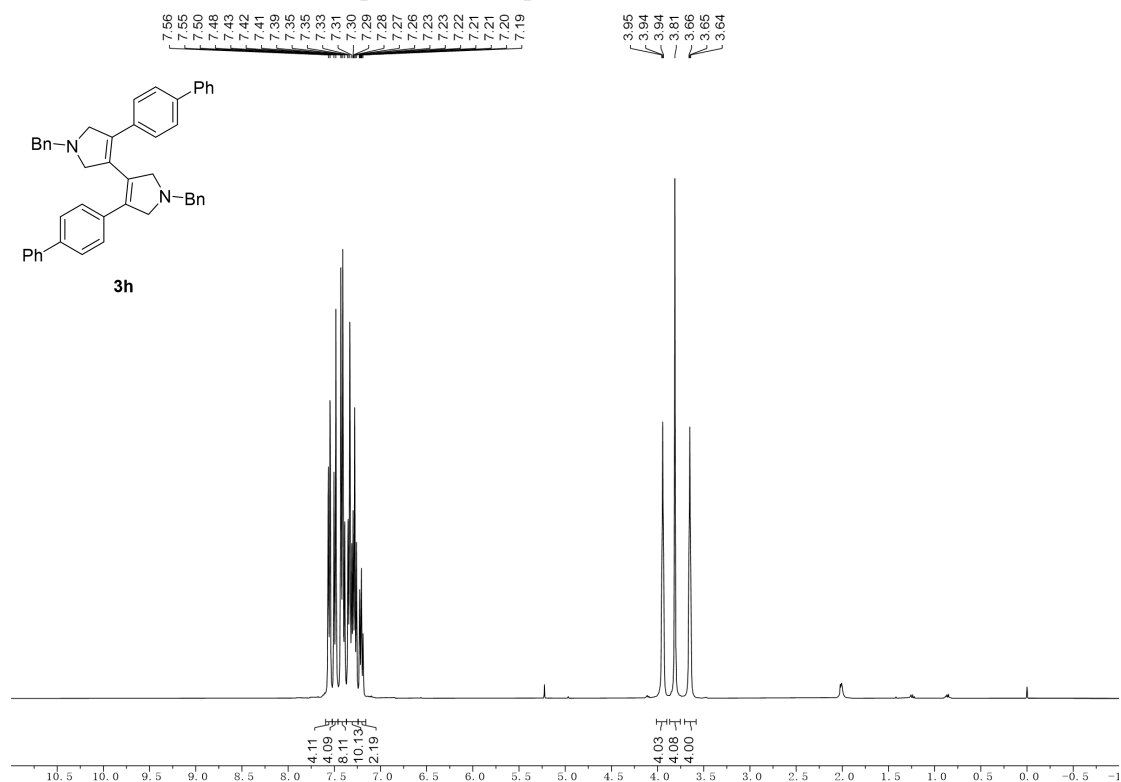

**$^{13}\text{C}\{^1\text{H}\}$  NMR (101 MHz,  $\text{CDCl}_3$ ) spectra of compound 3h:**

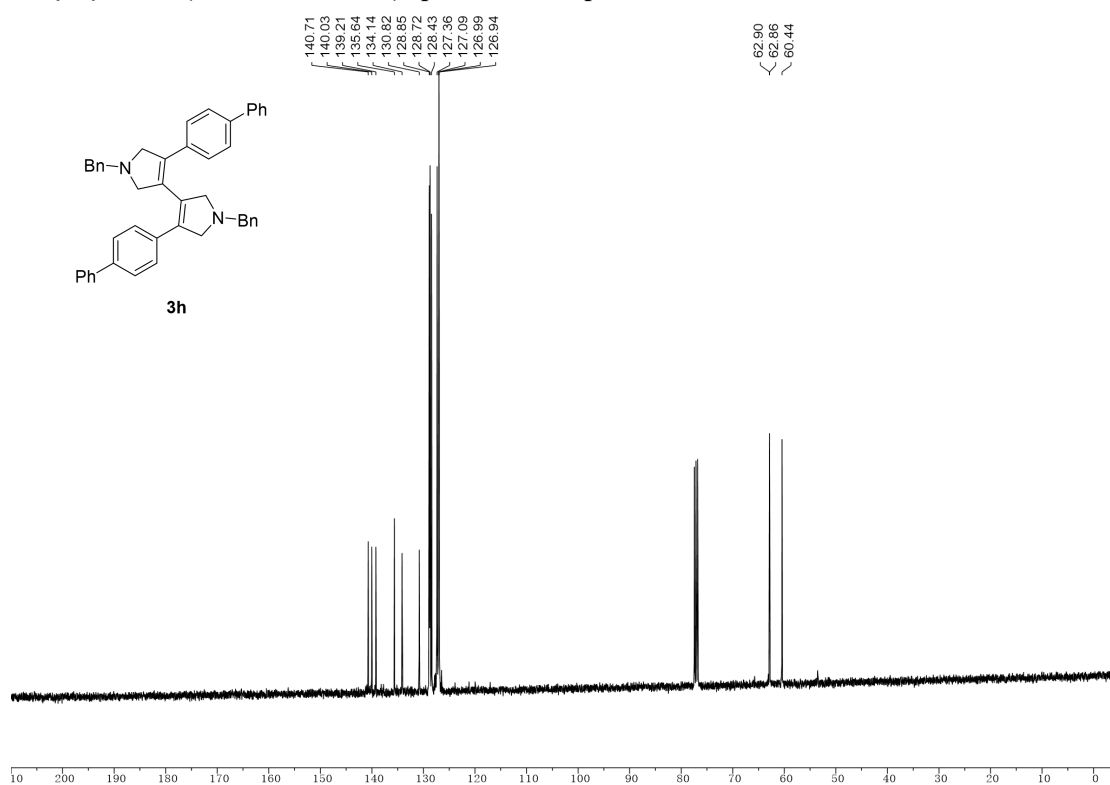

**$^1\text{H}$  NMR (400 MHz,  $\text{CDCl}_3$ ) spectra of compound **3i**:**

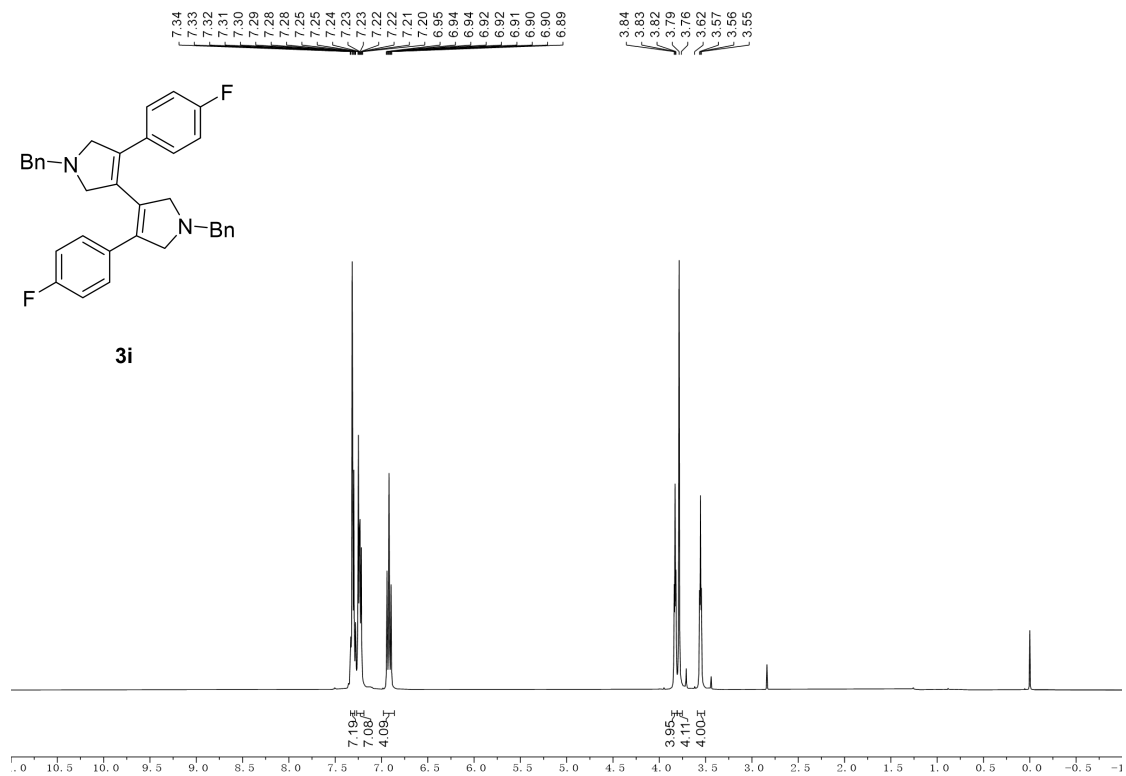

**$^{19}\text{F}\{^1\text{H}\}$  NMR (376 MHz,  $\text{CDCl}_3$ ) spectra of compound **3i**:**

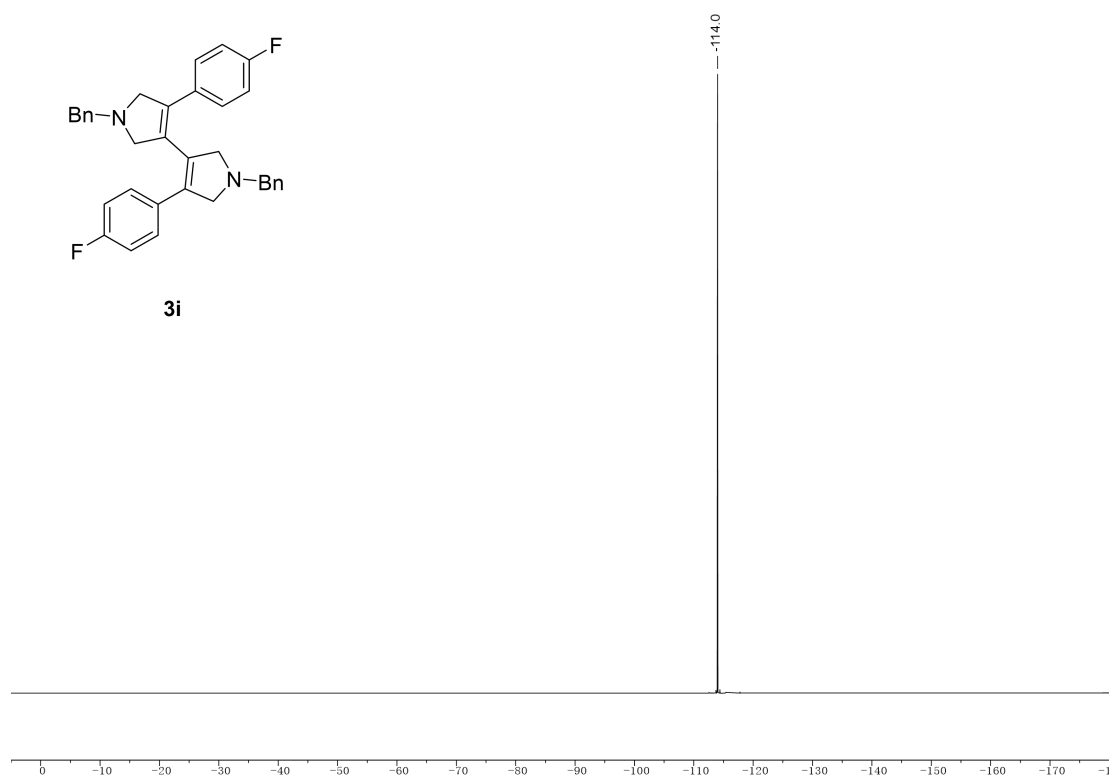

Chemical structure of **3i** is shown above the spectrum. The spectrum displays the following labeled peaks (ppm):

- 163.198
- 160.740
- 139.004
- 135.221
- 131.217
- 131.164
- 129.592
- 128.585
- 128.582
- 128.455
- 128.400
- 127.110
- 115.254
- 115.041
- 62.862
- 62.681
- 60.276

**3j**

COc1ccc(cc1)C2=CN(Cc3ccc(OC)cc3)C(C2)c4ccc(OC)cc4

<sup>1</sup>H NMR spectrum (CDCl<sub>3</sub>) of compound **3j**. The x-axis represents chemical shift in ppm, ranging from -0.5 to 10.5. The spectrum shows several peaks corresponding to the structure, with integration values indicated below the peaks.

Chemical structure of **3j** is shown above the spectrum.

Integration values (from left to right): 12.04, 2.24, 4.09, 4.02, 3.91, 3.82, 4.00.

Peak labels (from left to right): 7.32, 7.30, 7.29, 7.28, 7.27, 7.26, 7.25, 7.22, 7.21, 7.20, 7.19, 7.18, 6.90, 6.78, 6.77, 3.86, 3.85, 3.77, 3.74, 3.66, 3.55.



**$^{13}\text{C}\{^1\text{H}\}$  NMR (75 MHz,  $\text{CDCl}_3$ ) spectrum of compound 3j:**

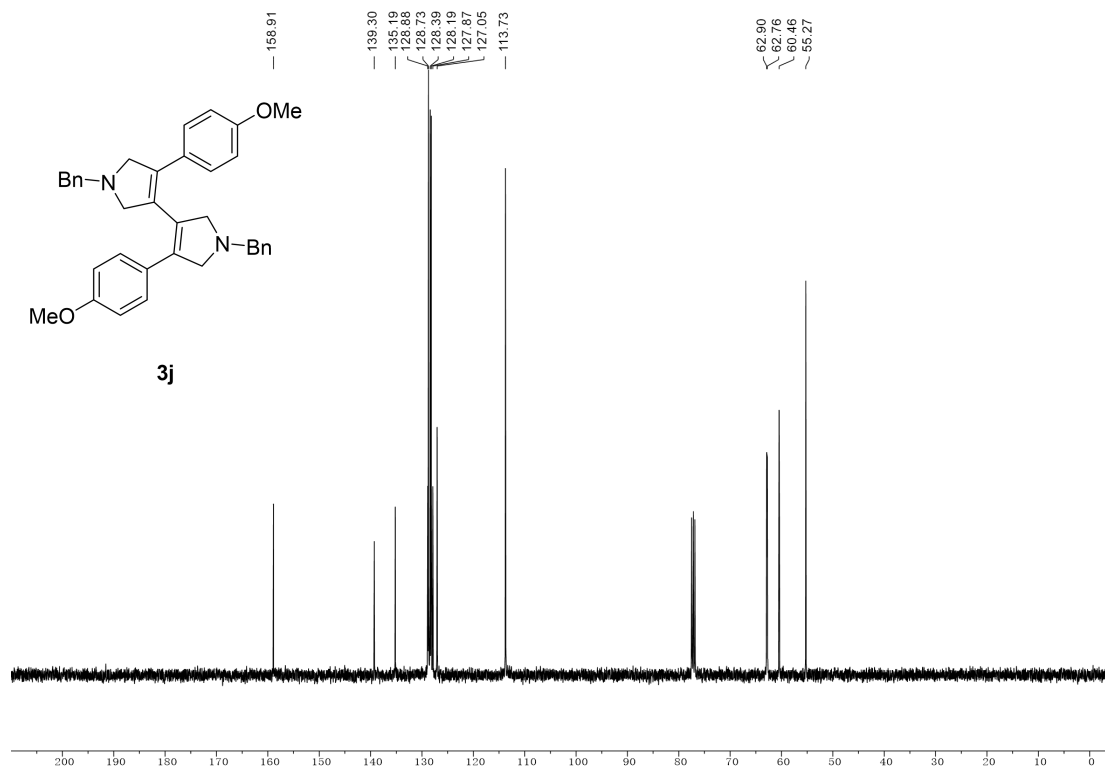

**$^1\text{H}$  NMR (400 MHz,  $\text{CDCl}_3$ ) spectrum of compound 3k:**

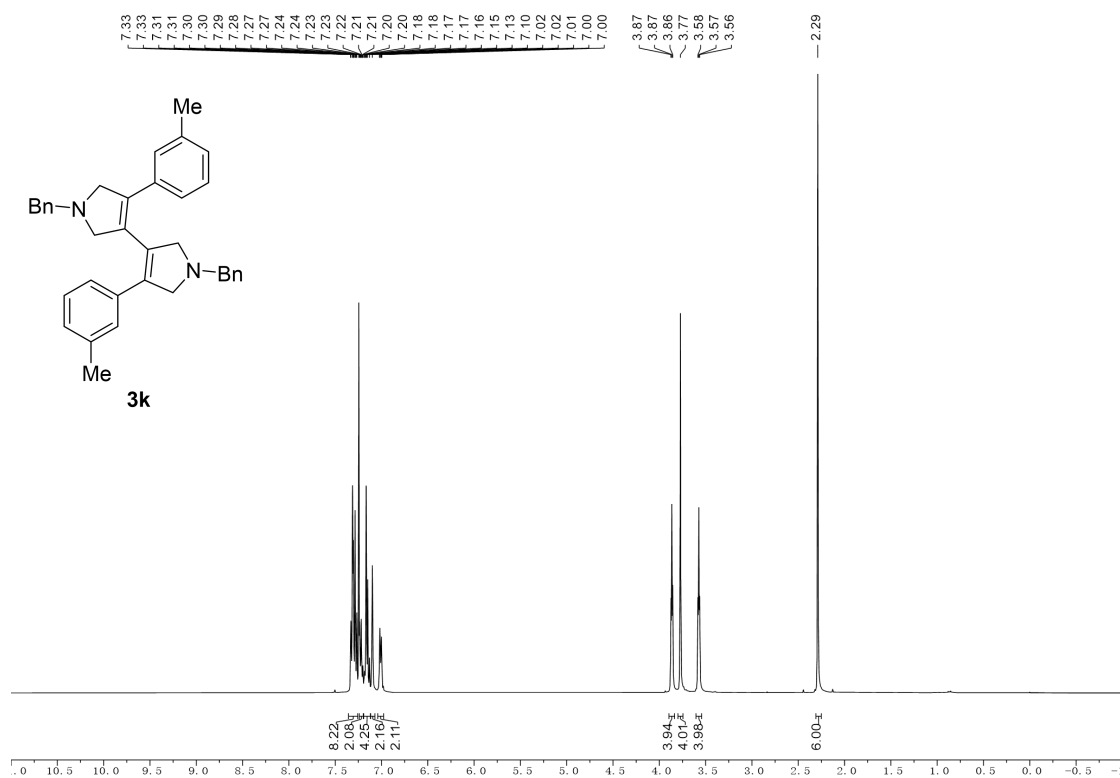

**$^{13}\text{C}\{^1\text{H}\}$  NMR (75 MHz,  $\text{CDCl}_3$ ) spectrum of compound 3k:**

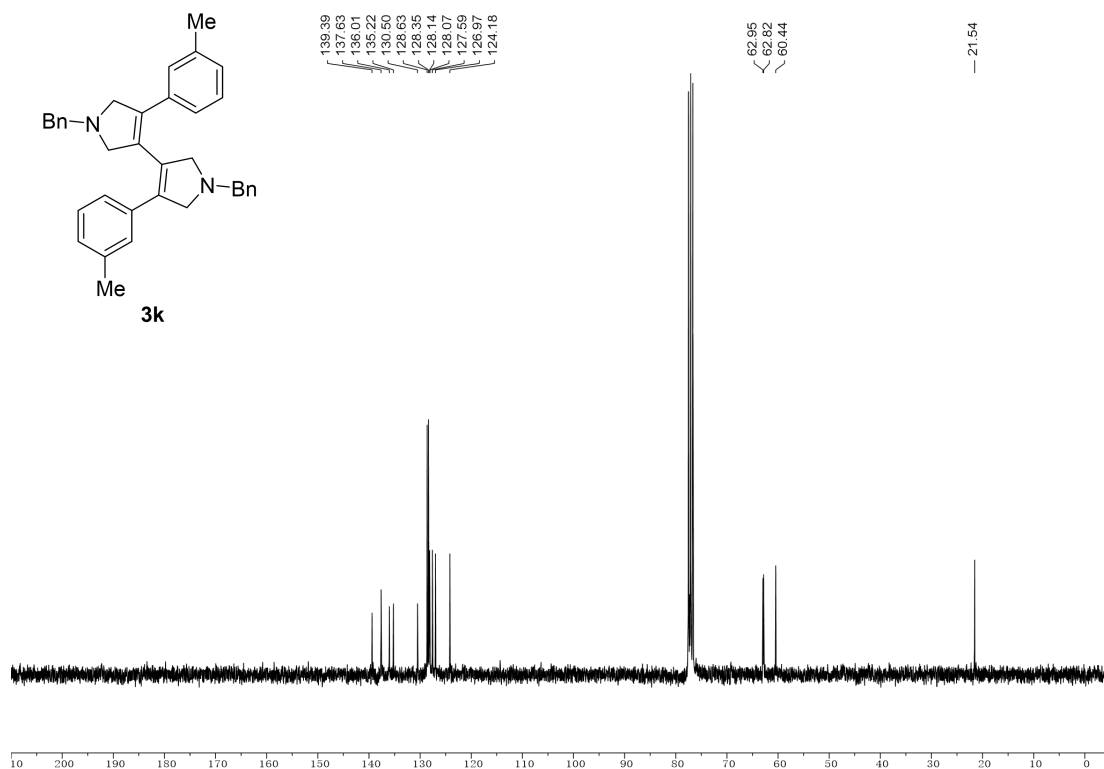

**$^1\text{H}$  NMR (400 MHz,  $\text{CDCl}_3$ ) spectra of compound 3l:**

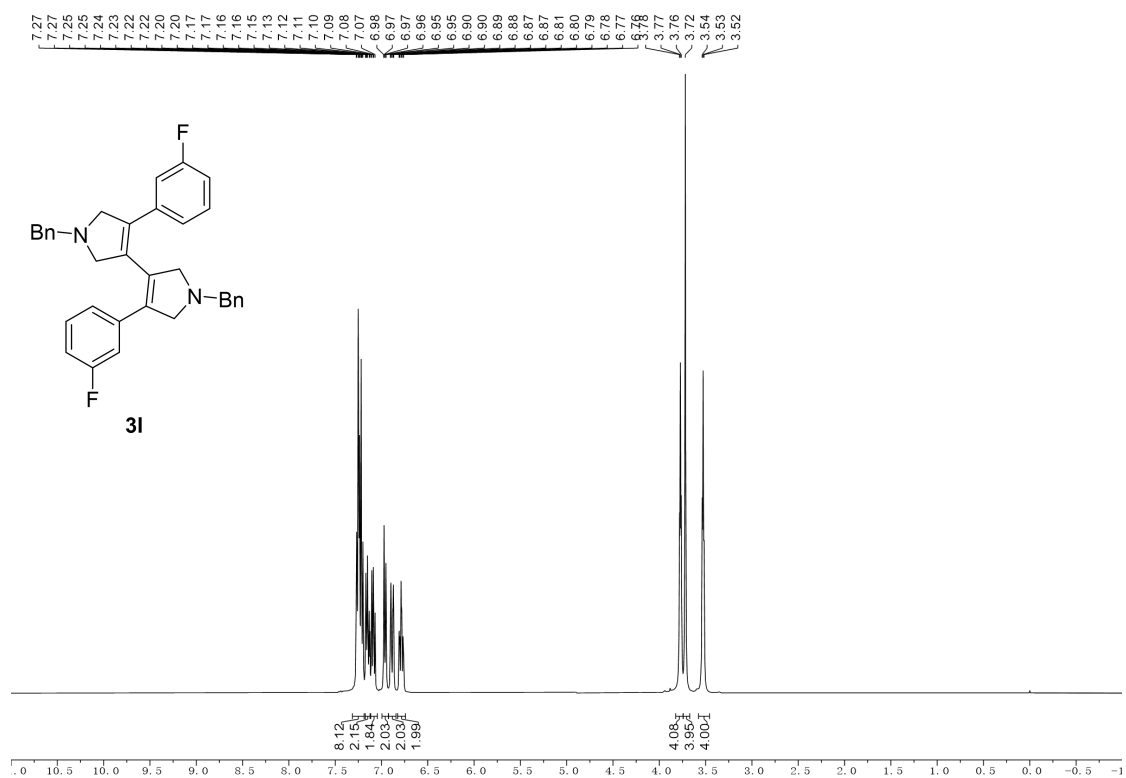

**$^{19}\text{F}\{^1\text{H}\}$  NMR (376 MHz,  $\text{CDCl}_3$ ) spectra of compound 3l:**

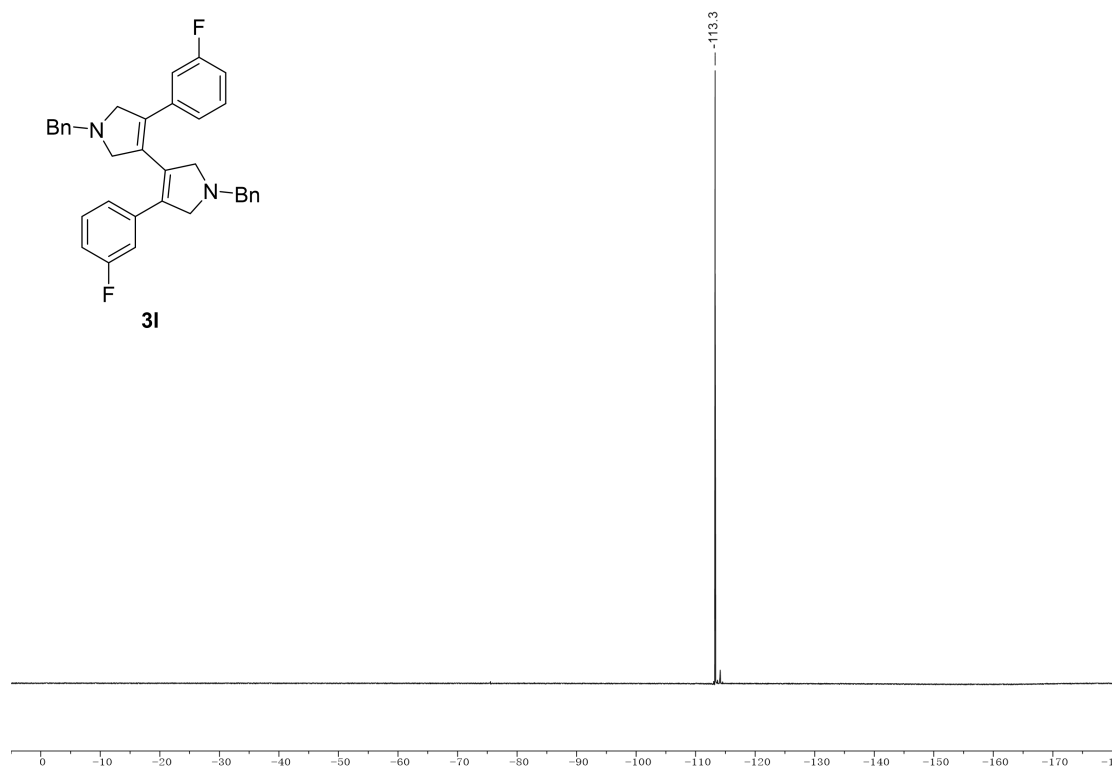

**$^{13}\text{C}\{^1\text{H}\}$  NMR (101 MHz,  $\text{CDCl}_3$ ) spectra of compound 3l:**

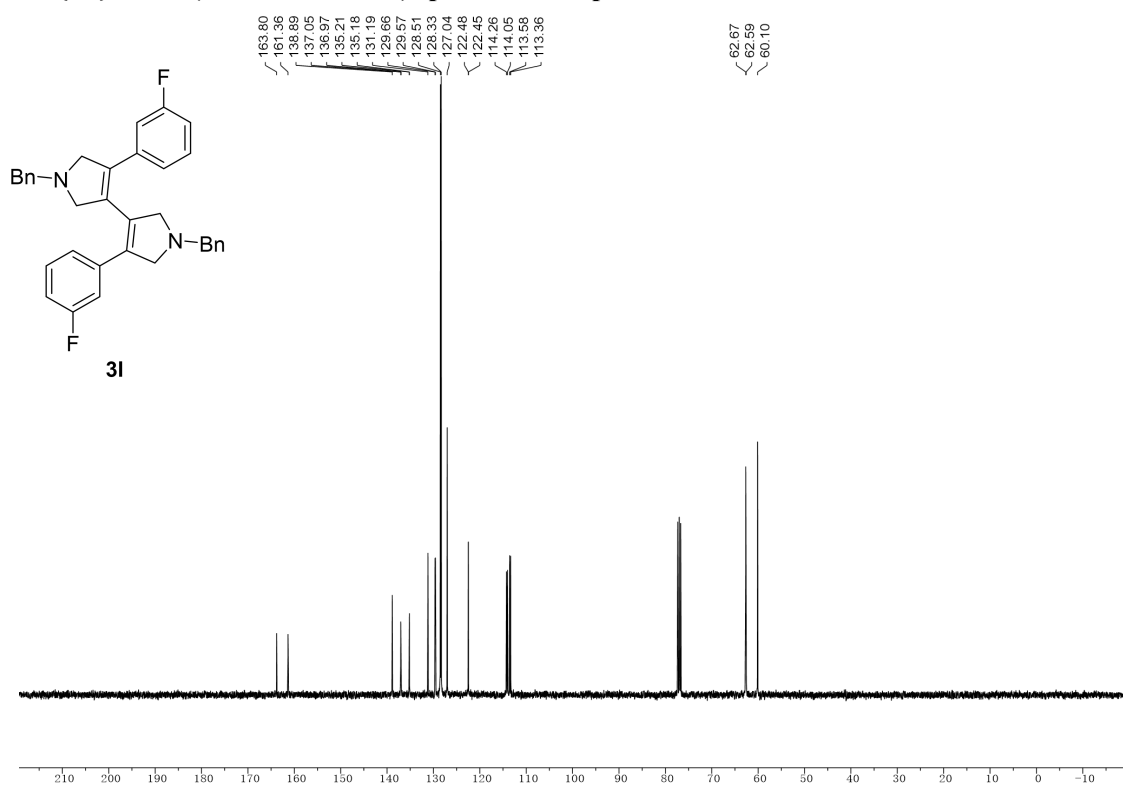

**$^1\text{H}$  NMR (400 MHz,  $\text{CDCl}_3$ ) spectrum of compound 3m:**

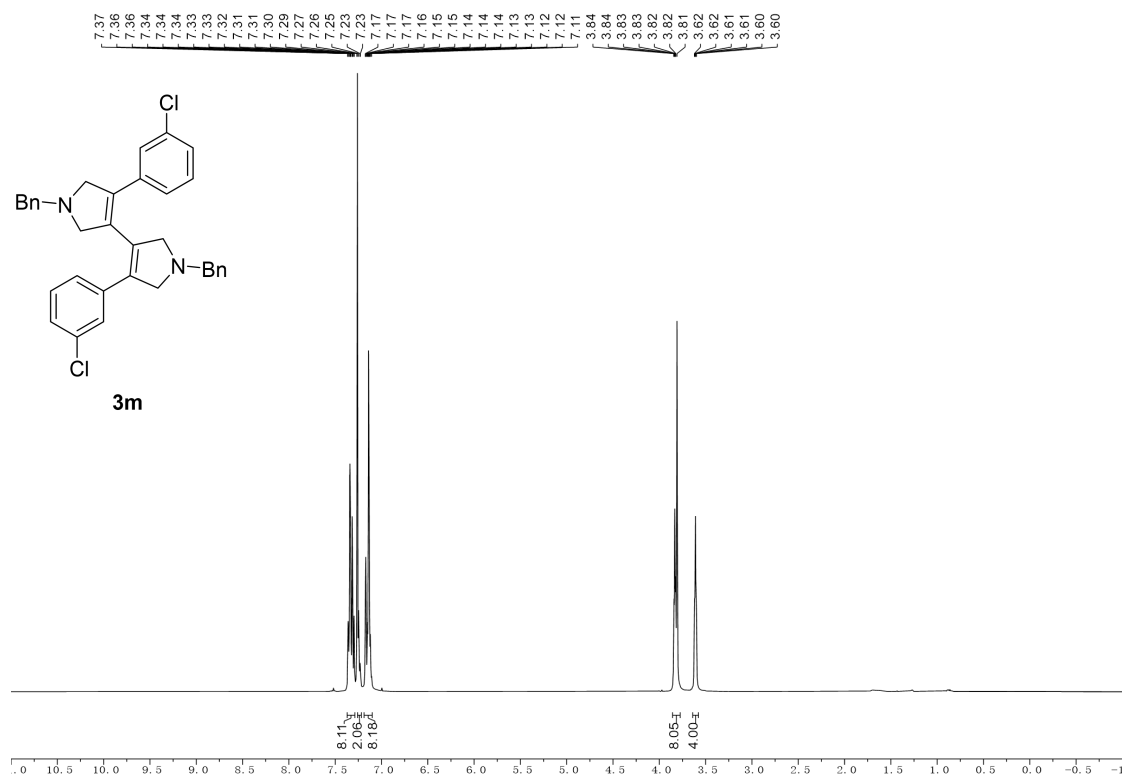

**$^{13}\text{C}\{^1\text{H}\}$  NMR (101 MHz,  $\text{CDCl}_3$ ) spectrum of compound 3m:**

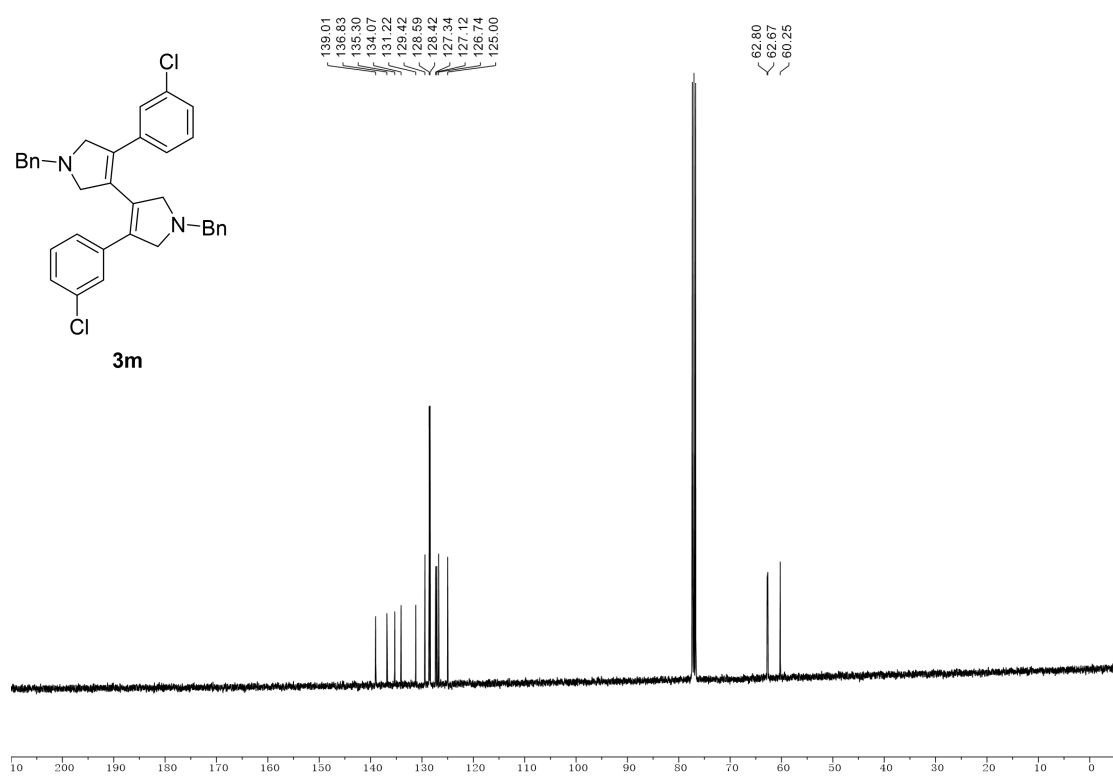

**$^1\text{H}$  NMR (400 MHz,  $\text{CDCl}_3$ ) spectrum of compound 3n:**

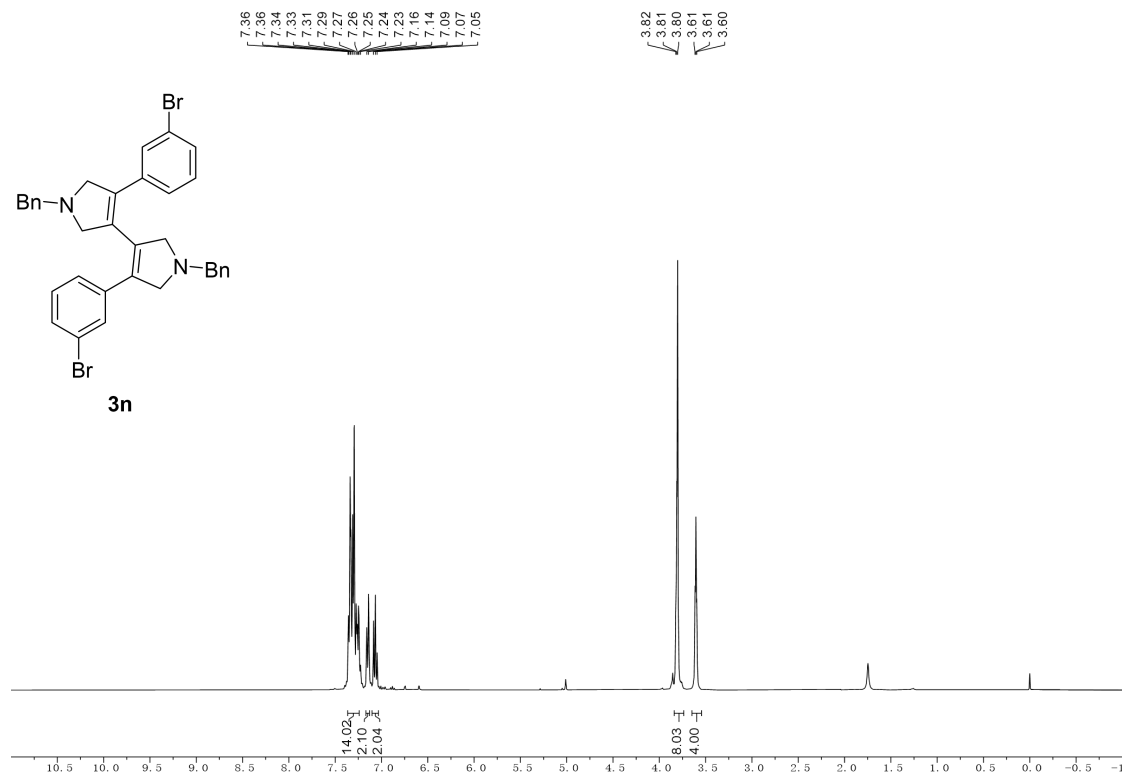

**$^{13}\text{C}\{^1\text{H}\}$  NMR (101 MHz,  $\text{CDCl}_3$ ) spectrum of compound 3n:**

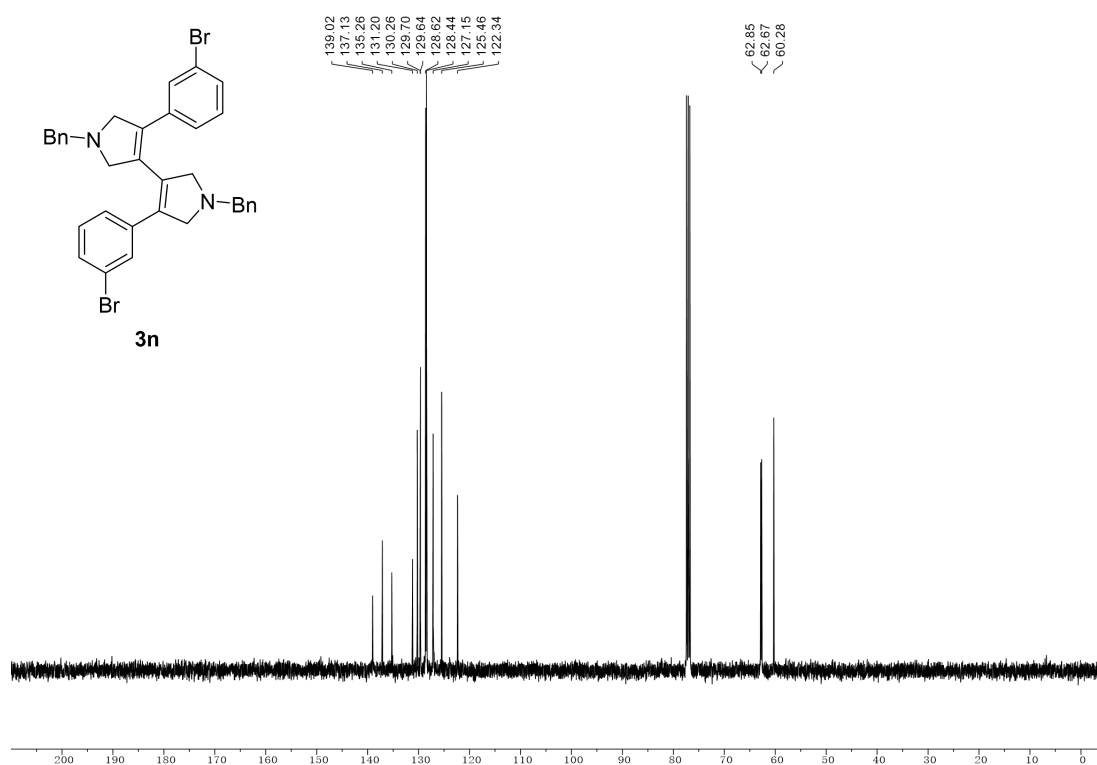

**$^1\text{H}$  NMR (400 MHz,  $\text{CDCl}_3$ ) spectrum of compound **3o**:**

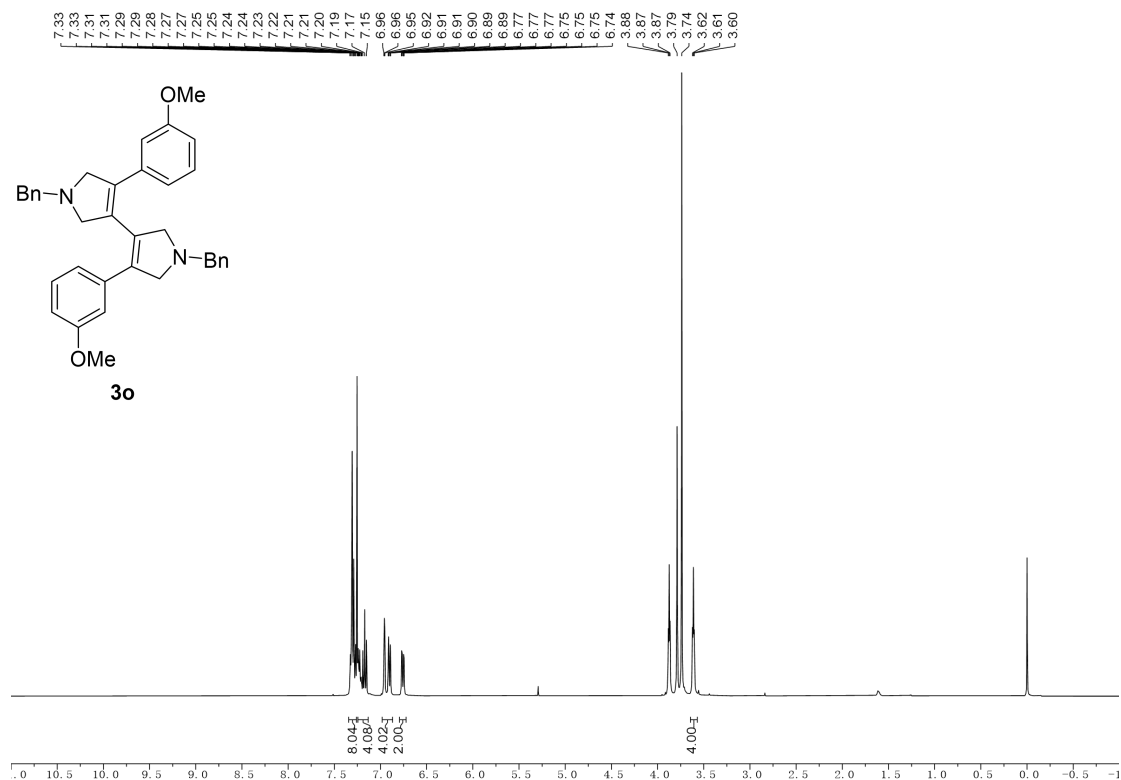

**$^{13}\text{C}\{^1\text{H}\}$  NMR (101 MHz,  $\text{CDCl}_3$ ) spectrum of compound **3o**:**

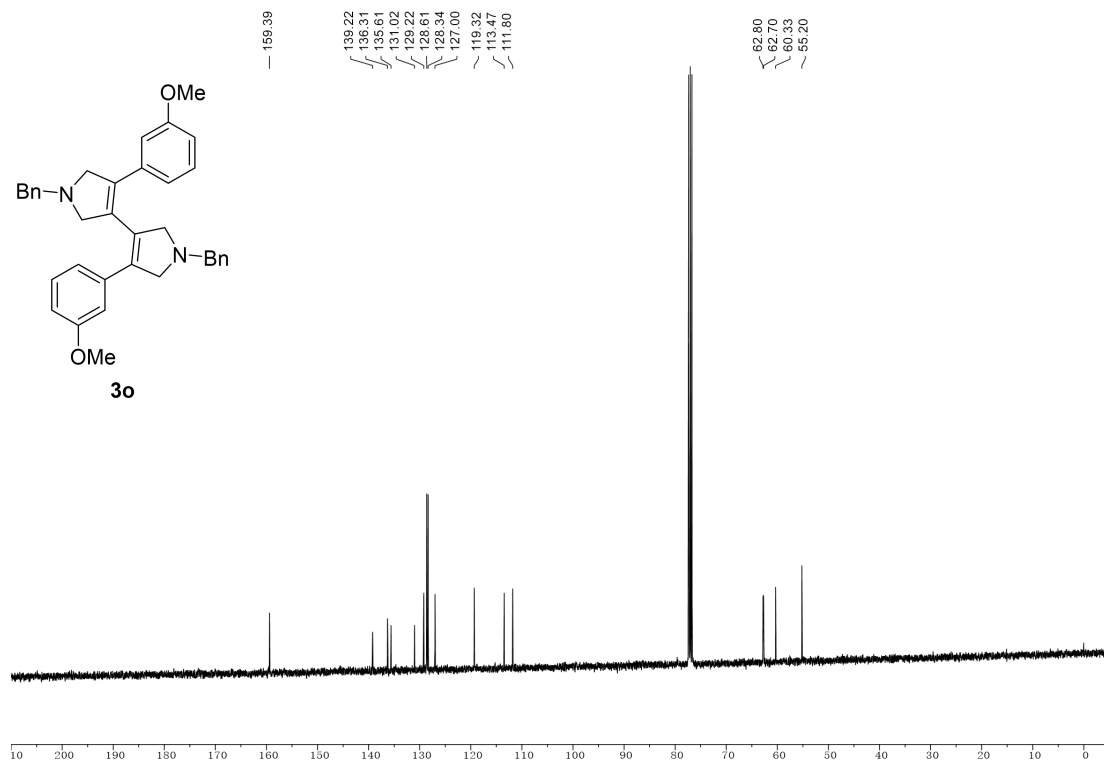

**$^1\text{H}$  NMR (400 MHz,  $\text{CDCl}_3$ ) spectrum of compound 3p:**

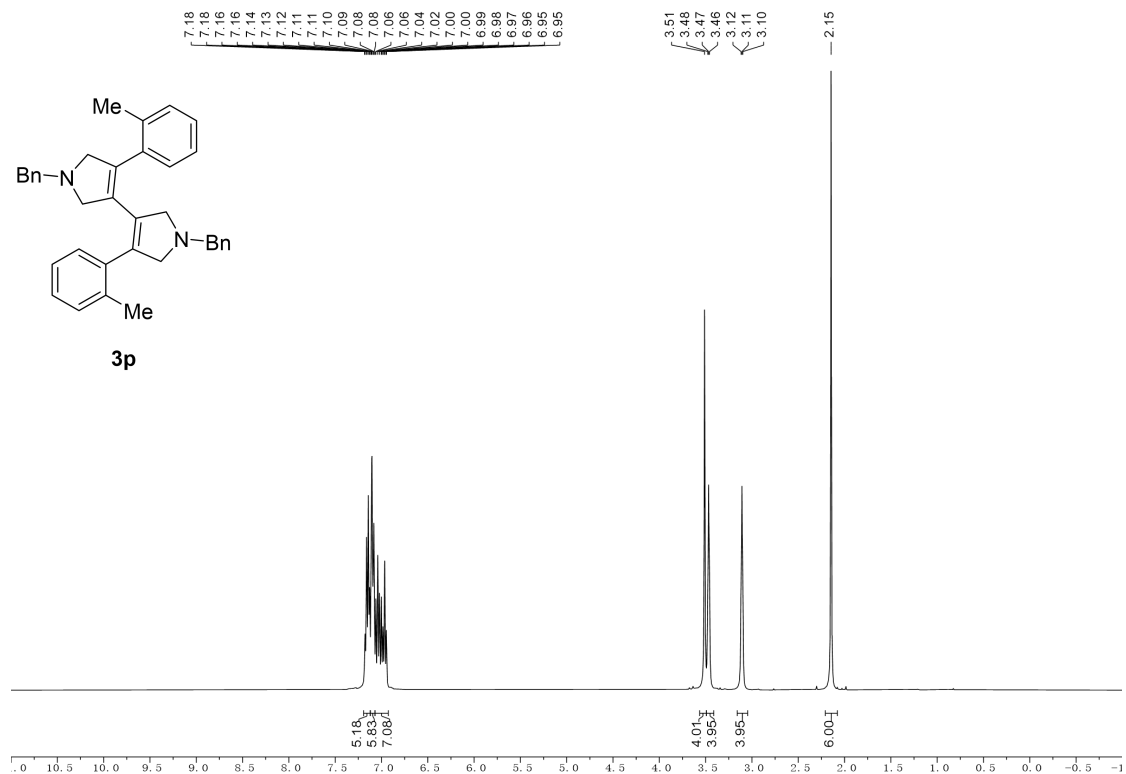

**$^{13}\text{C}\{^1\text{H}\}$  NMR (101 MHz,  $\text{CDCl}_3$ ) spectrum of compound 3p:**

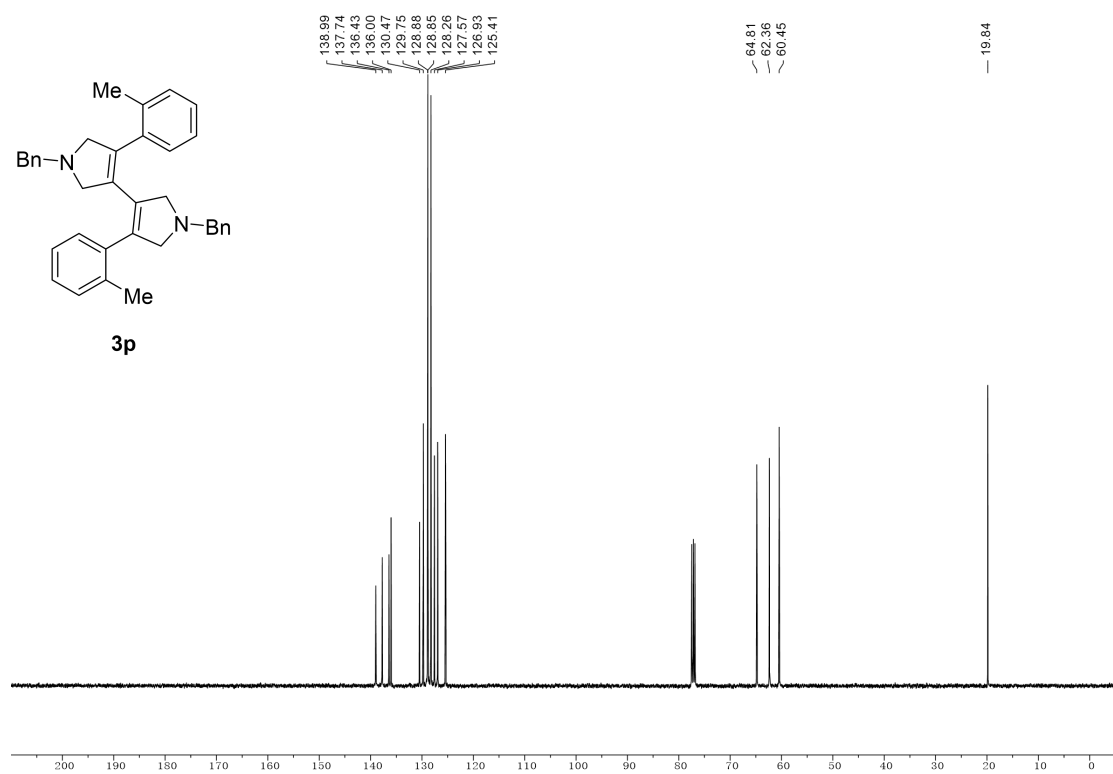

**$^1\text{H}$  NMR (400 MHz,  $\text{CDCl}_3$ ) spectra of compound 3q:**

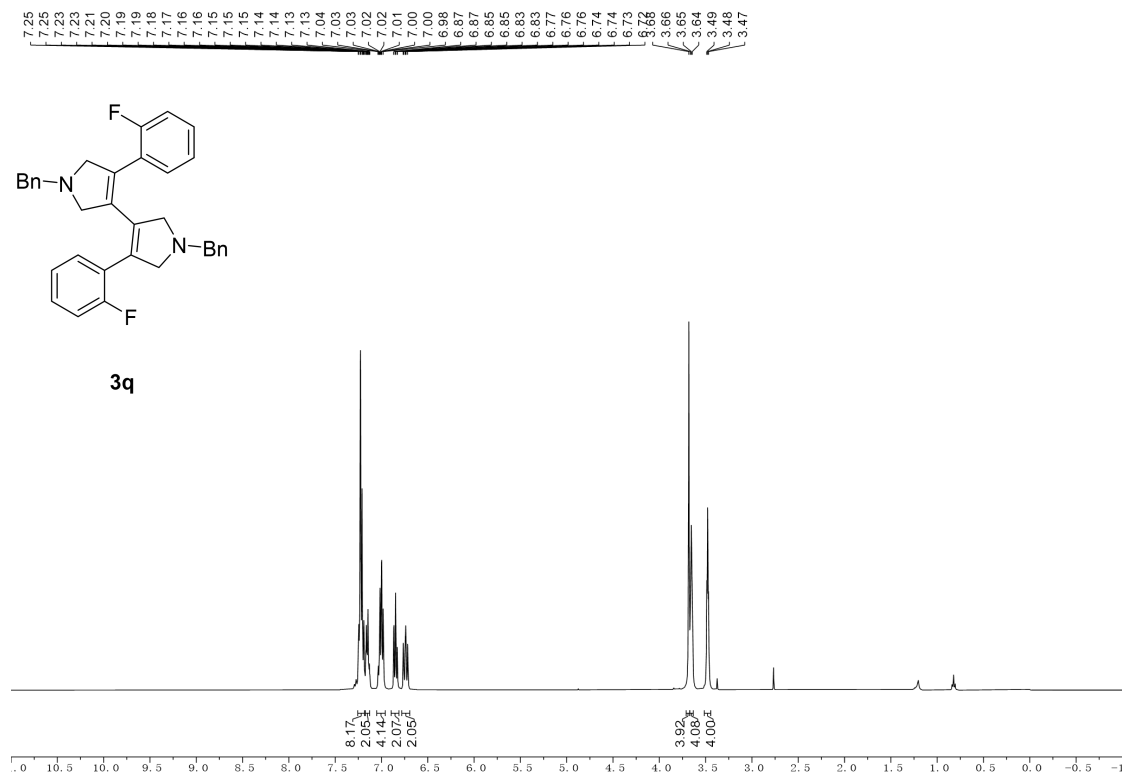

**$^{19}\text{F}\{^1\text{H}\}$  NMR (376 MHz,  $\text{CDCl}_3$ ) spectra of compound 3q:**

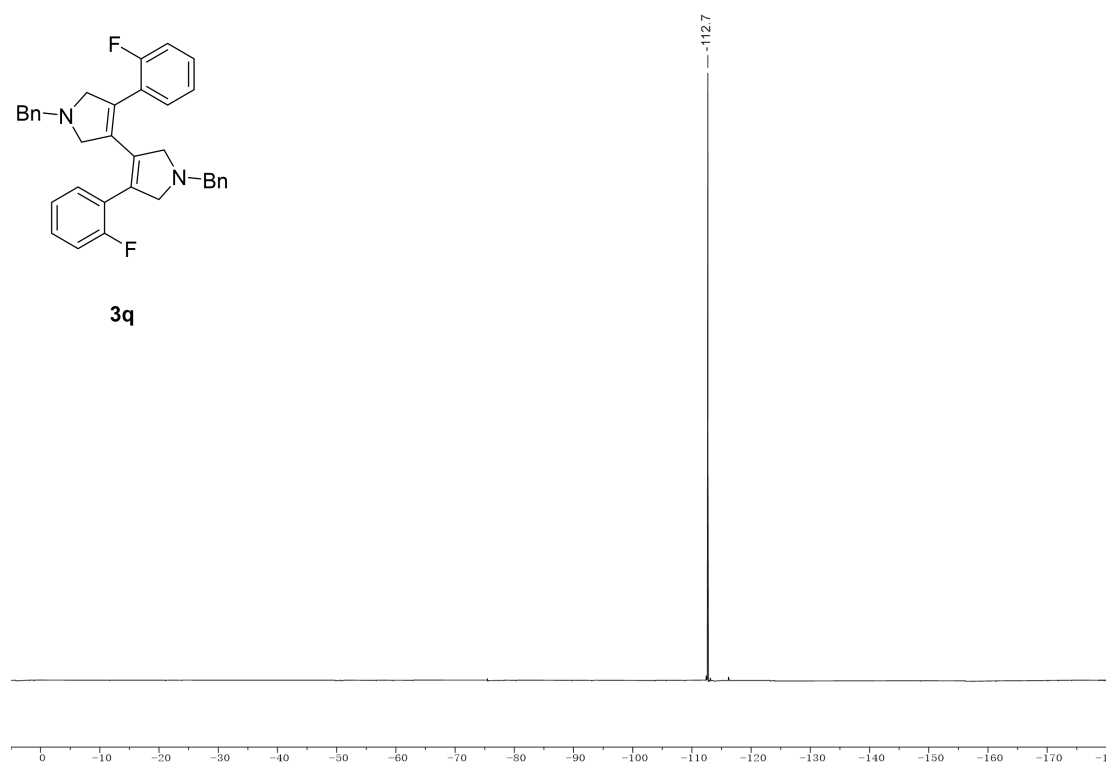



**$^{13}\text{C}\{^1\text{H}\}$  NMR (101 MHz,  $\text{CDCl}_3$ ) spectra of compound 3q:**

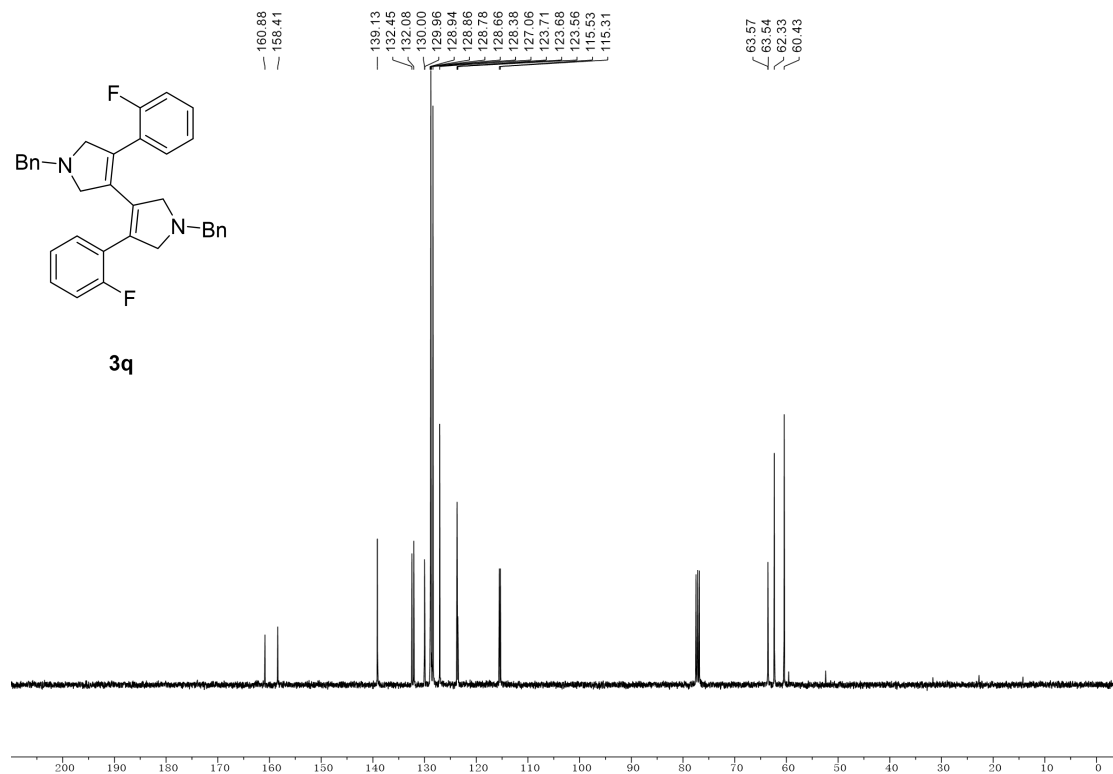

**$^1\text{H}$  NMR (400 MHz,  $\text{CDCl}_3$ ) spectrum of compound 3r:**

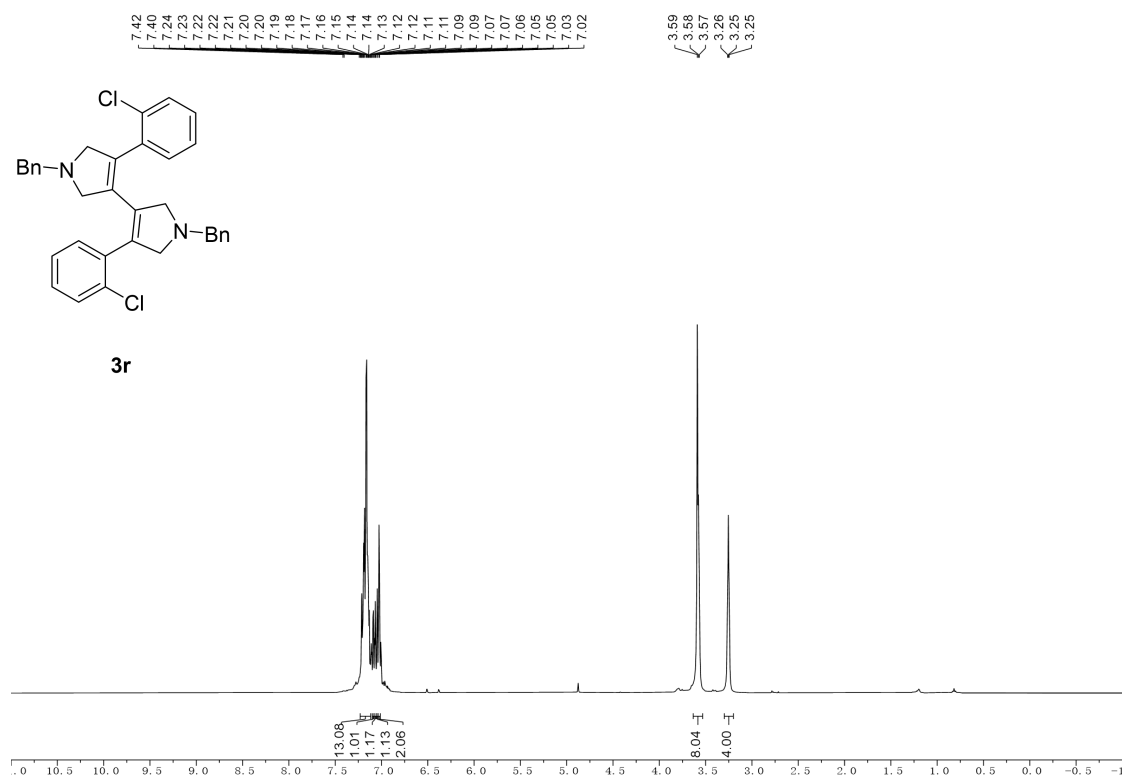

**$^{13}\text{C}\{^1\text{H}\}$  NMR (101 MHz,  $\text{CDCl}_3$ ) spectrum of compound 3r:**

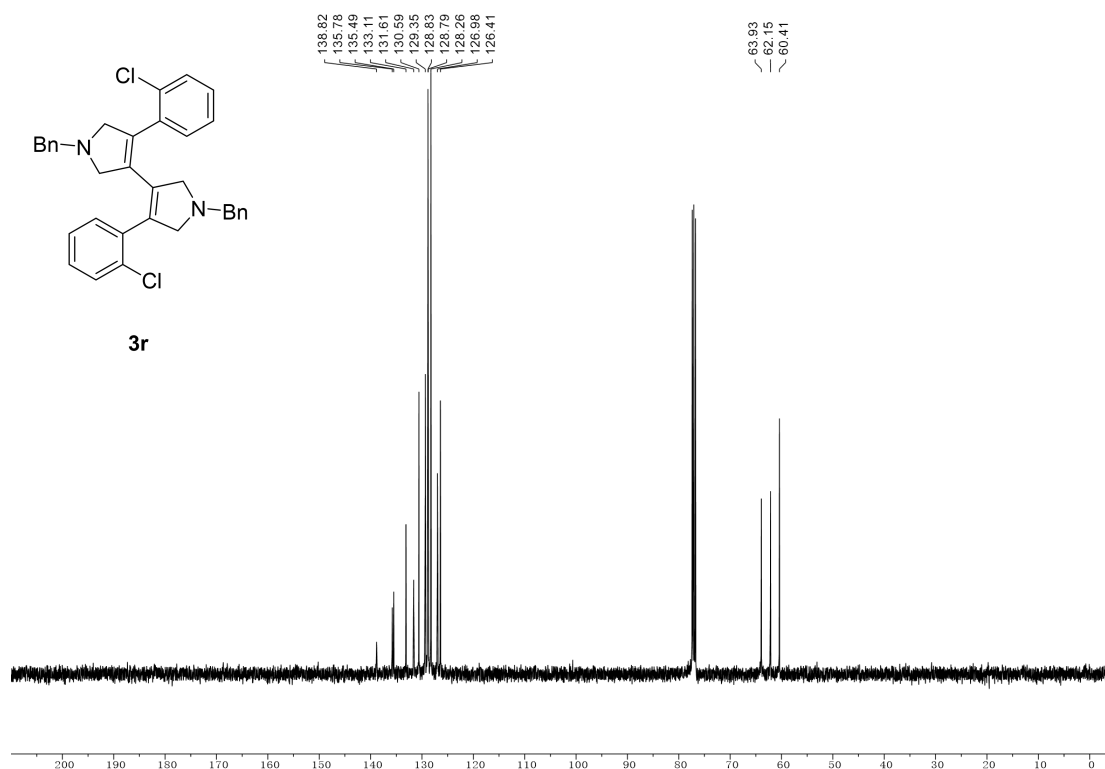

**$^1\text{H}$  NMR (400 MHz,  $\text{CDCl}_3$ ) spectrum of compound 3s:**

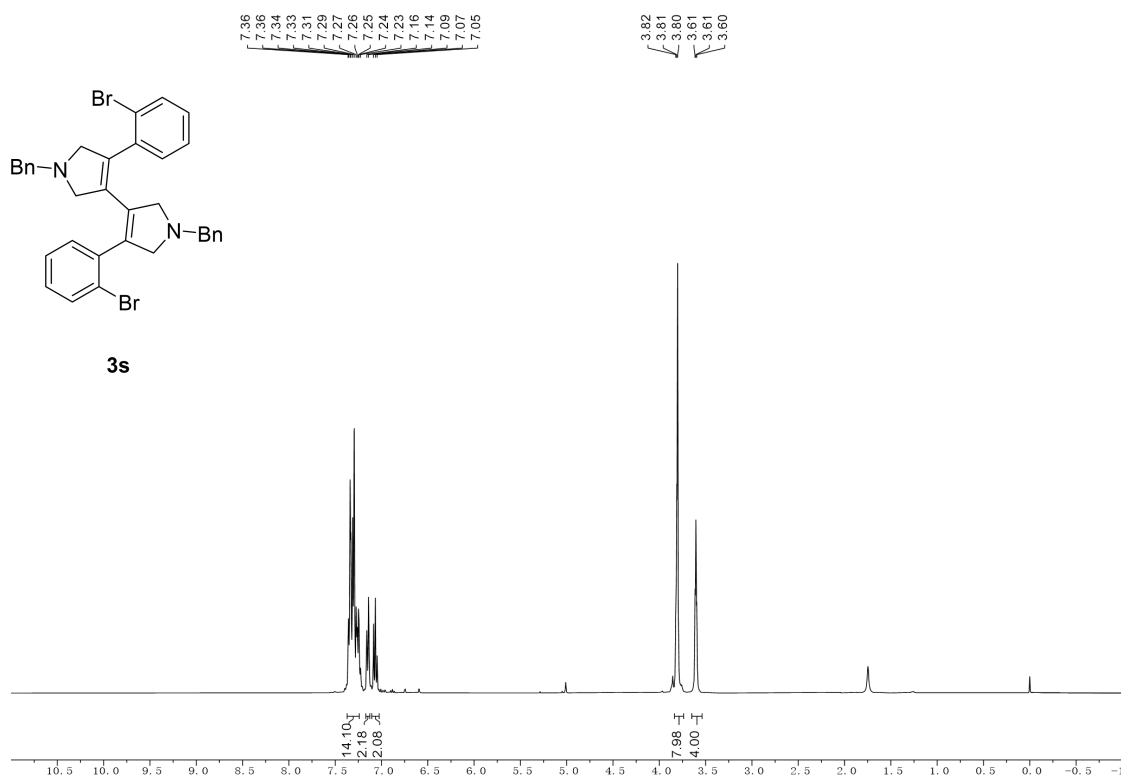

**$^{13}\text{C}\{^1\text{H}\}$  NMR (101 MHz,  $\text{CDCl}_3$ ) spectrum of compound 3s:**

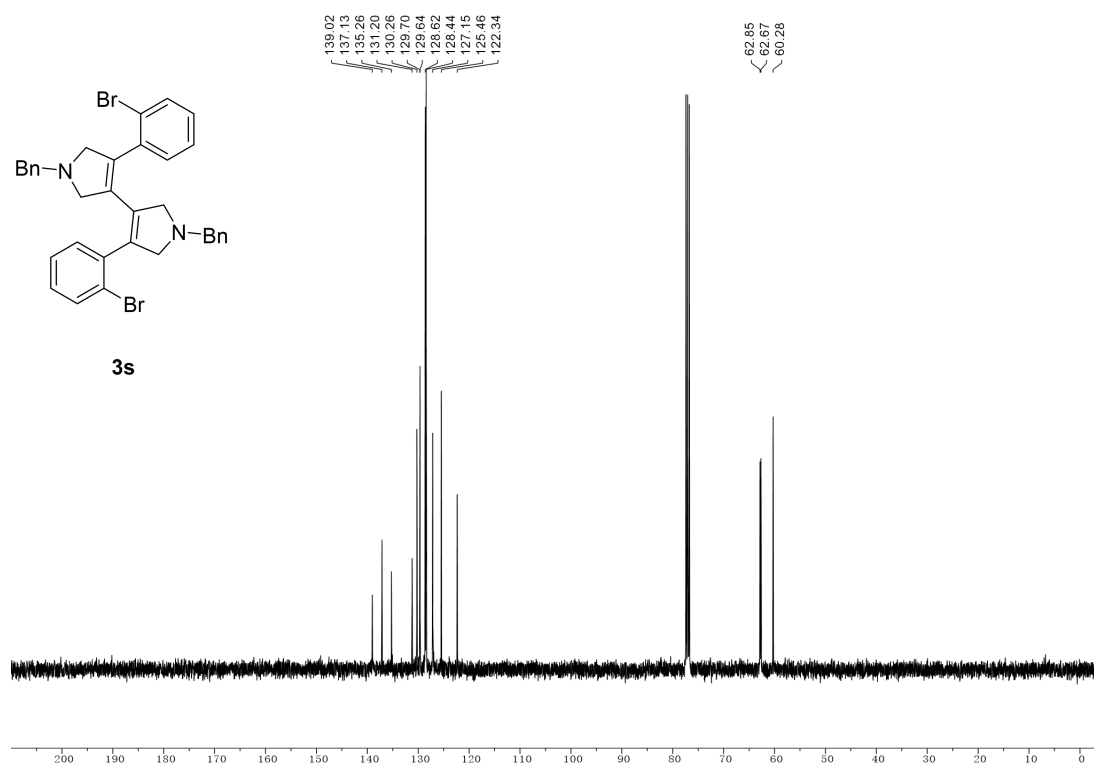

**$^1\text{H}$  NMR (400 MHz,  $\text{CDCl}_3$ ) spectra of compound 3t:**

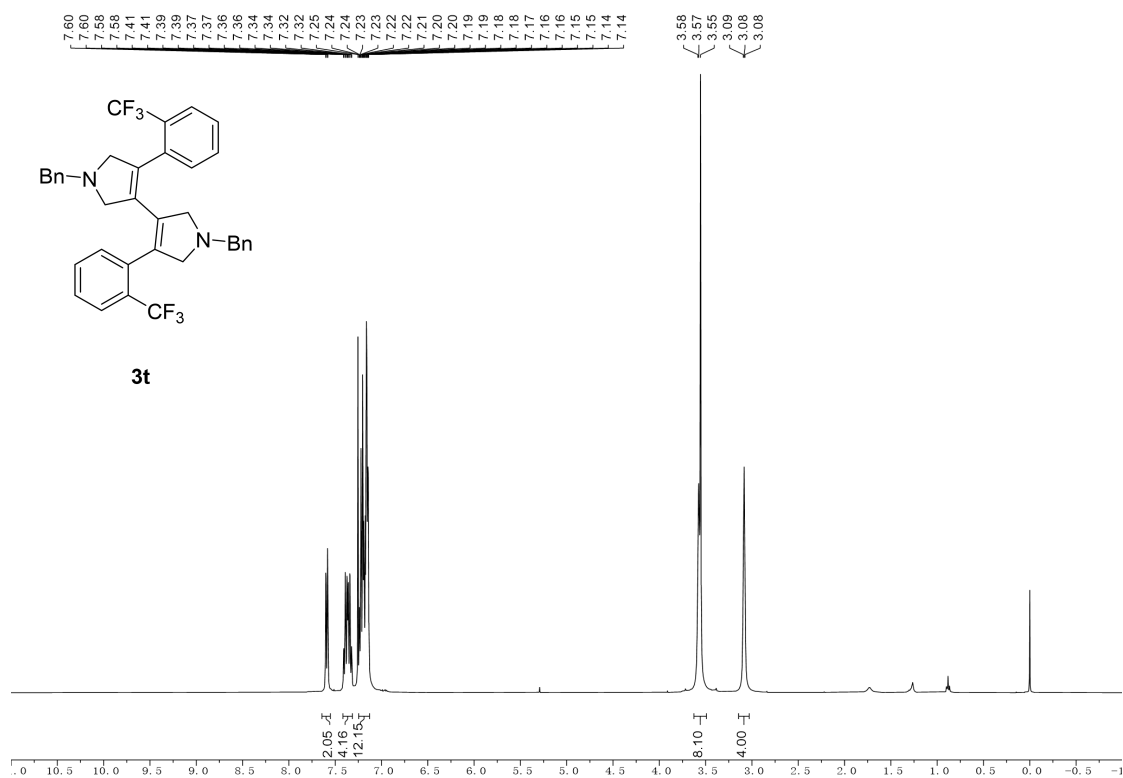

**$^{19}\text{F}\{^1\text{H}\}$  NMR (376 MHz,  $\text{CDCl}_3$ ) spectra of compound 3t:**

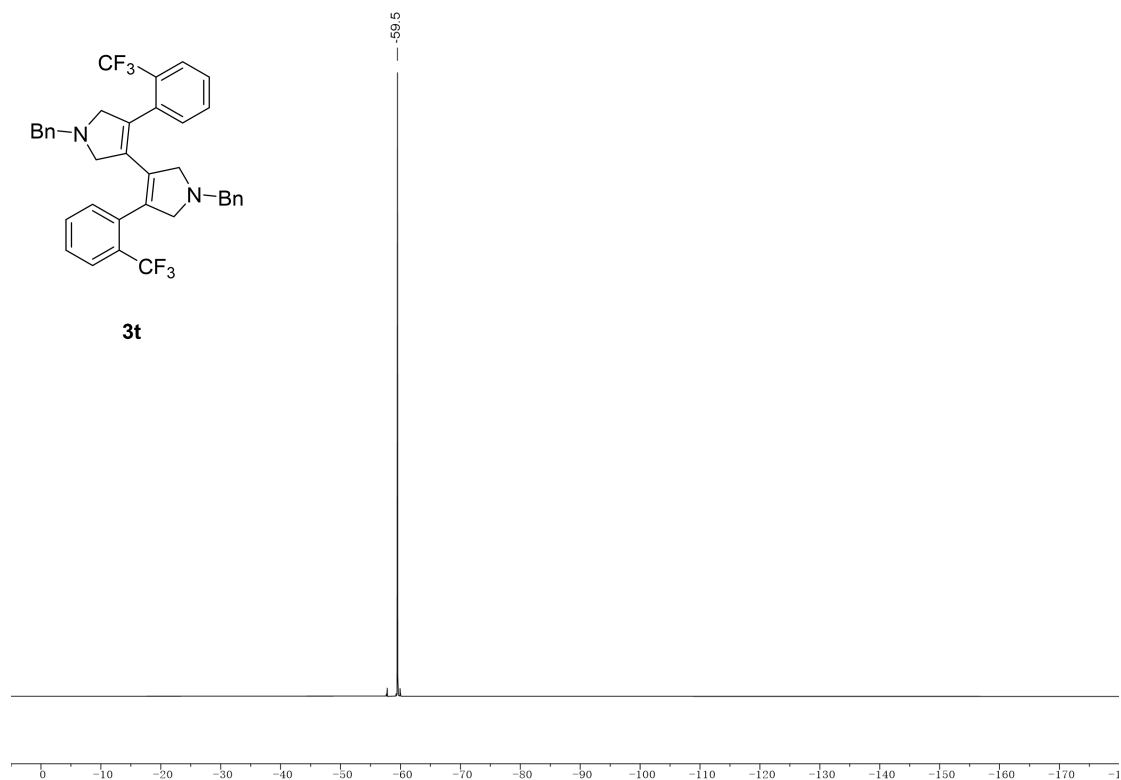

**$^{13}\text{C}\{^1\text{H}\}$  NMR (101 MHz,  $\text{CDCl}_3$ ) spectra of compound 3t:**

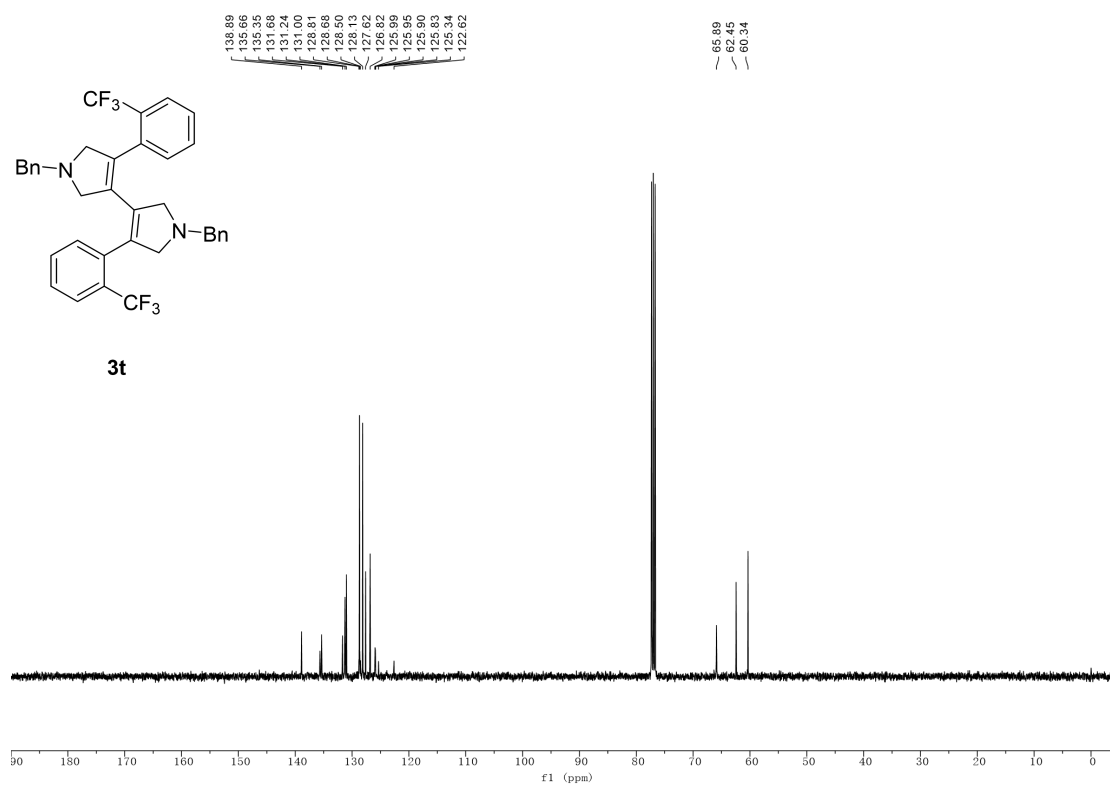

**$^1\text{H}$  NMR (400 MHz,  $\text{CDCl}_3$ ) spectrum of compound 3u:**

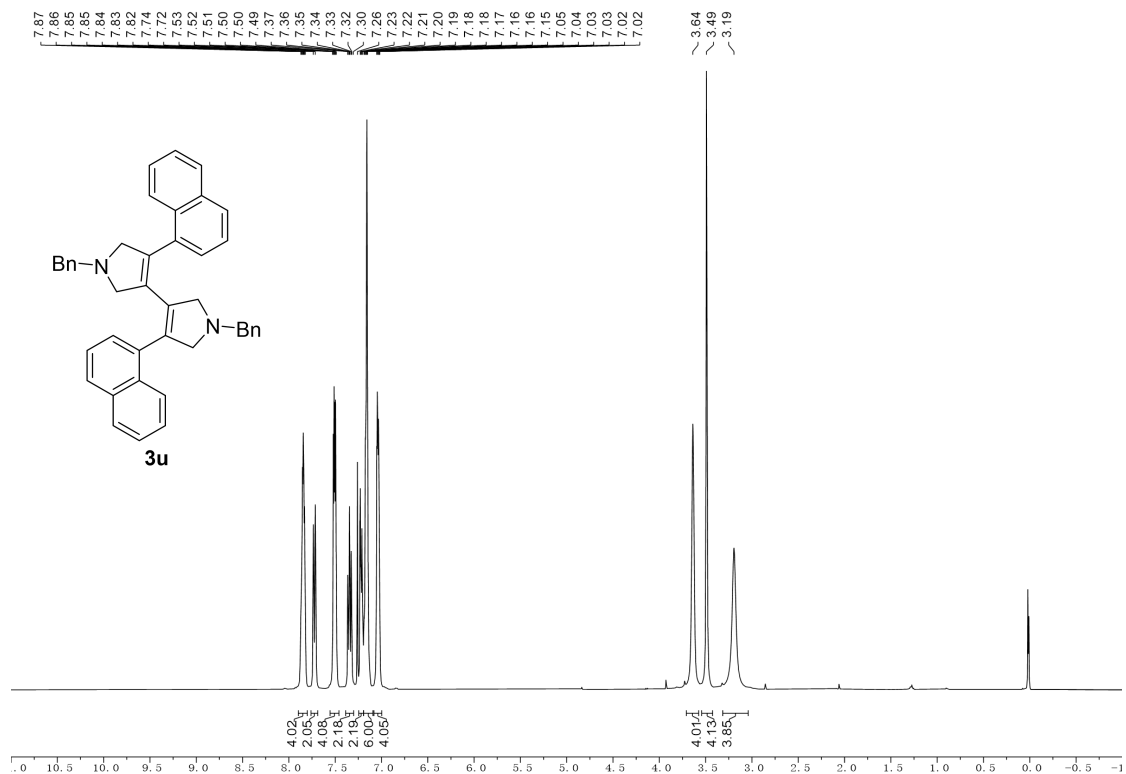

**$^{13}\text{C}\{^1\text{H}\}$  NMR (101 MHz,  $\text{CDCl}_3$ ) spectrum of compound 3u:**

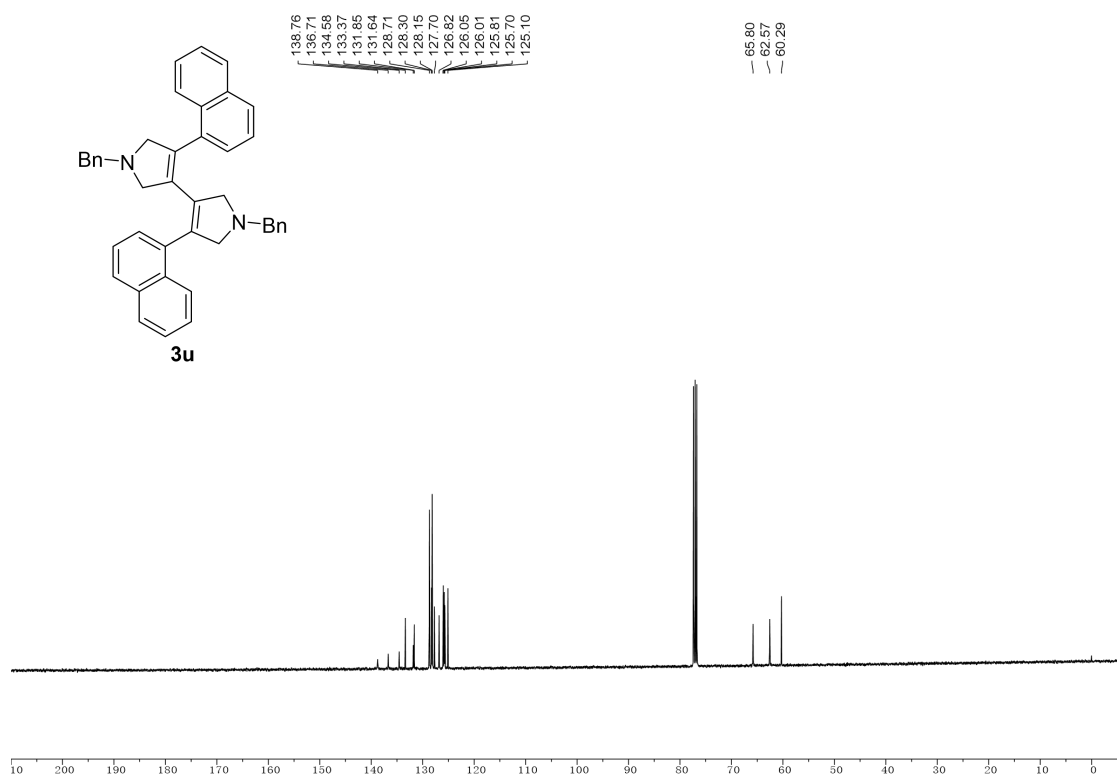

**$^1\text{H}$  NMR (400 MHz,  $\text{CDCl}_3$ ) spectrum of compound 3v:**

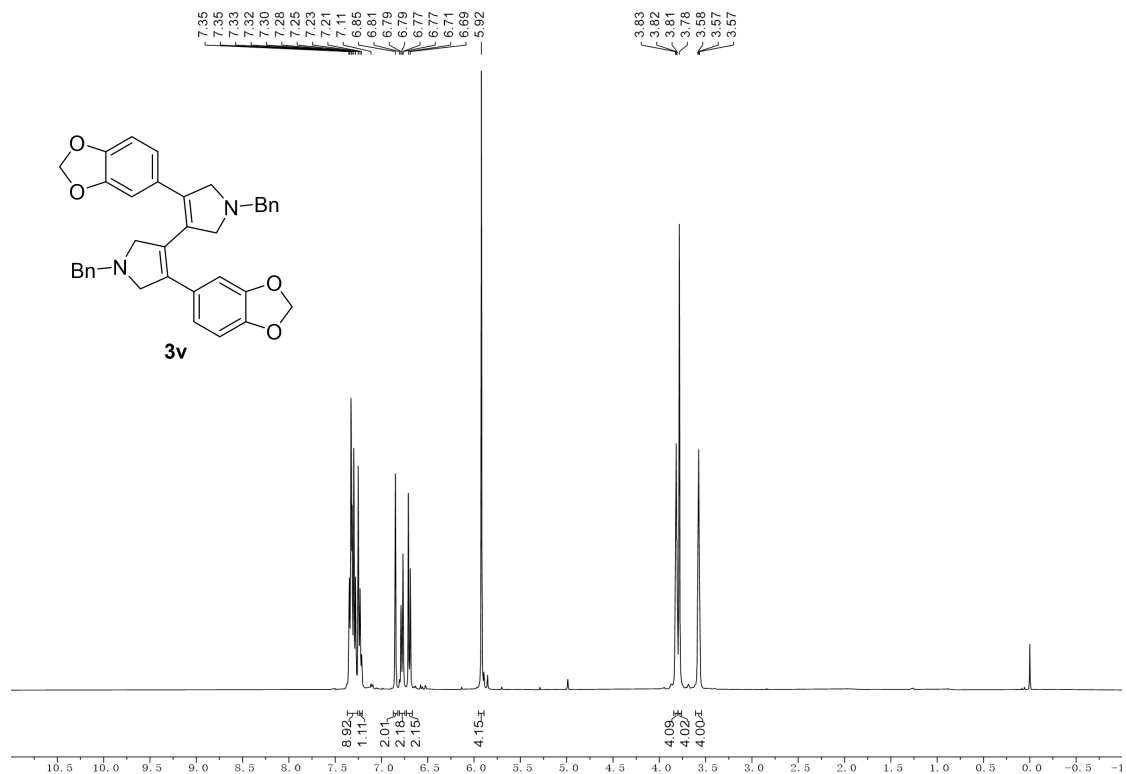

**$^{13}\text{C}\{^1\text{H}\}$  NMR (101 MHz,  $\text{CDCl}_3$ ) spectrum of compound 3v:**

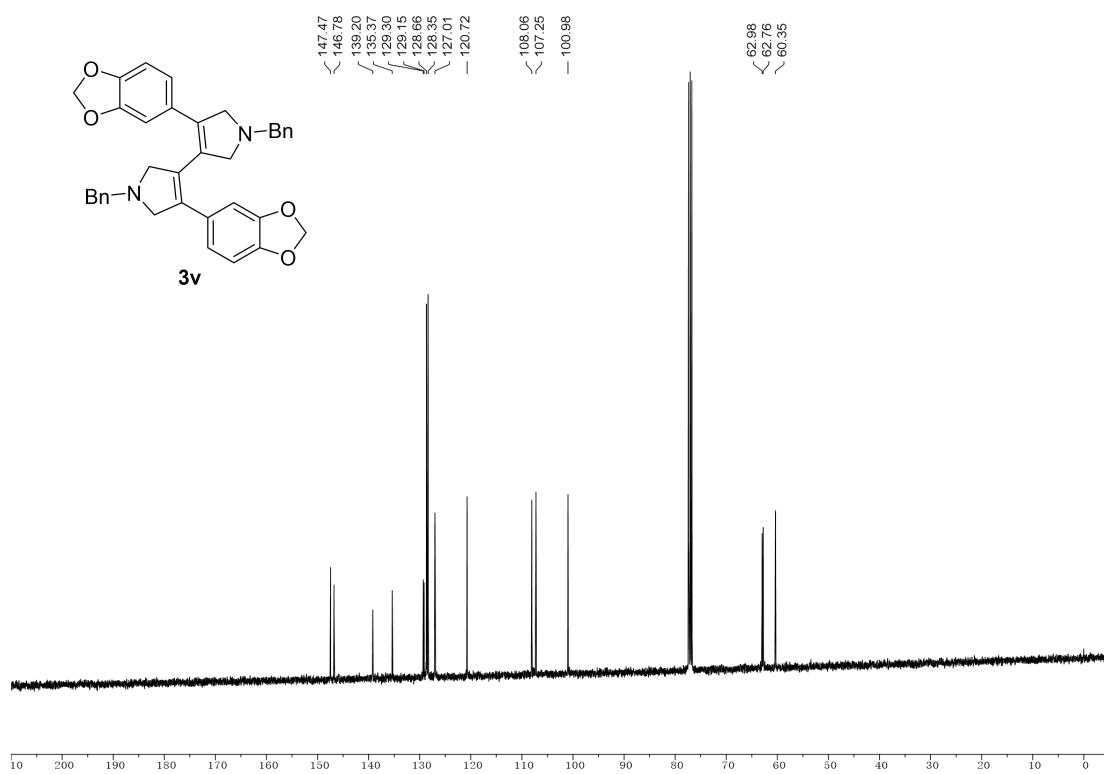

**$^1\text{H}$  NMR (400 MHz,  $\text{CDCl}_3$ ) spectrum of compound 3w:**

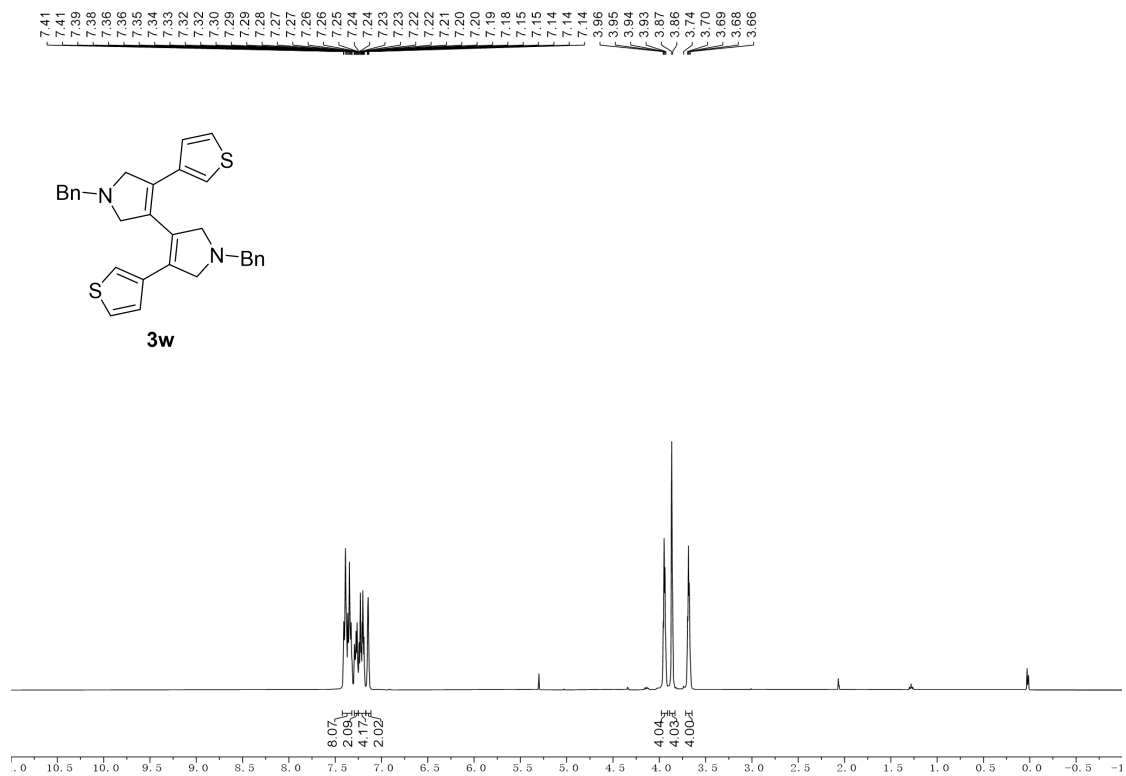

**$^{13}\text{C}\{^1\text{H}\}$  NMR (101 MHz,  $\text{CDCl}_3$ ) spectrum of compound 3w:**

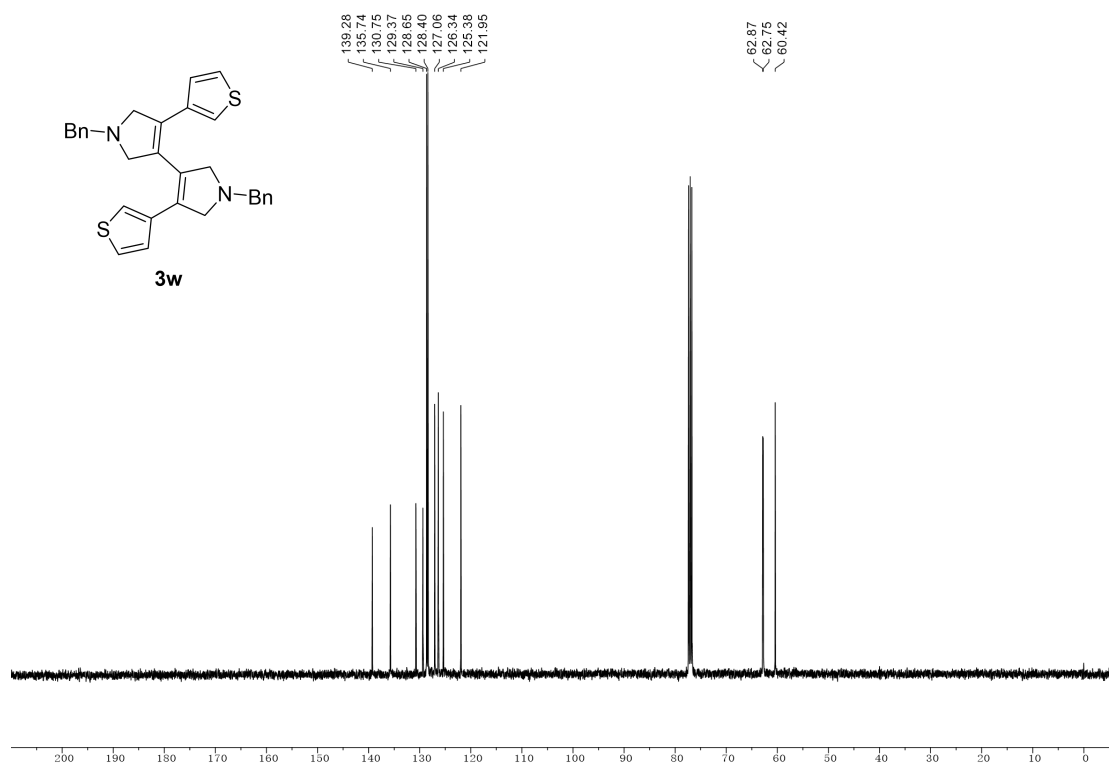

**$^1\text{H}$  NMR (400 MHz,  $\text{CDCl}_3$ ) spectrum of compound 3x:**

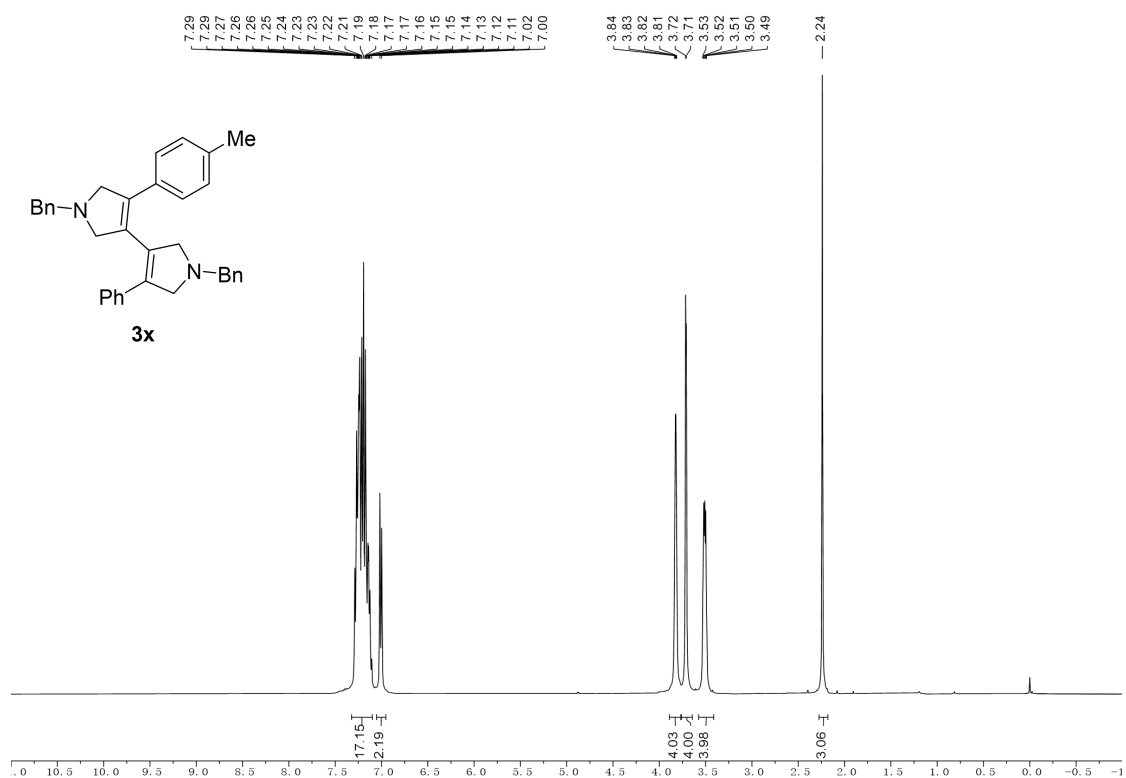

**$^{13}\text{C}\{^1\text{H}\}$  NMR (101 MHz,  $\text{CDCl}_3$ ) spectrum of compound 3x:**

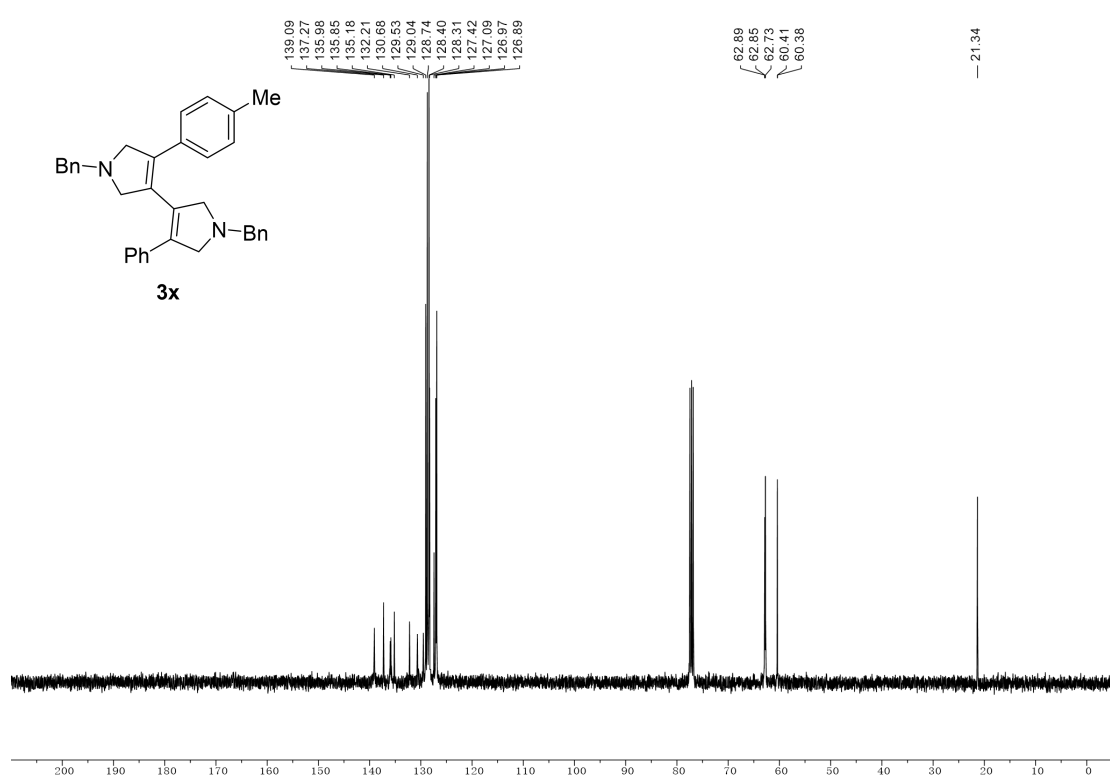



**$^1\text{H}$  NMR (400 MHz,  $\text{CDCl}_3$ ) spectrum of compound **3y**:**

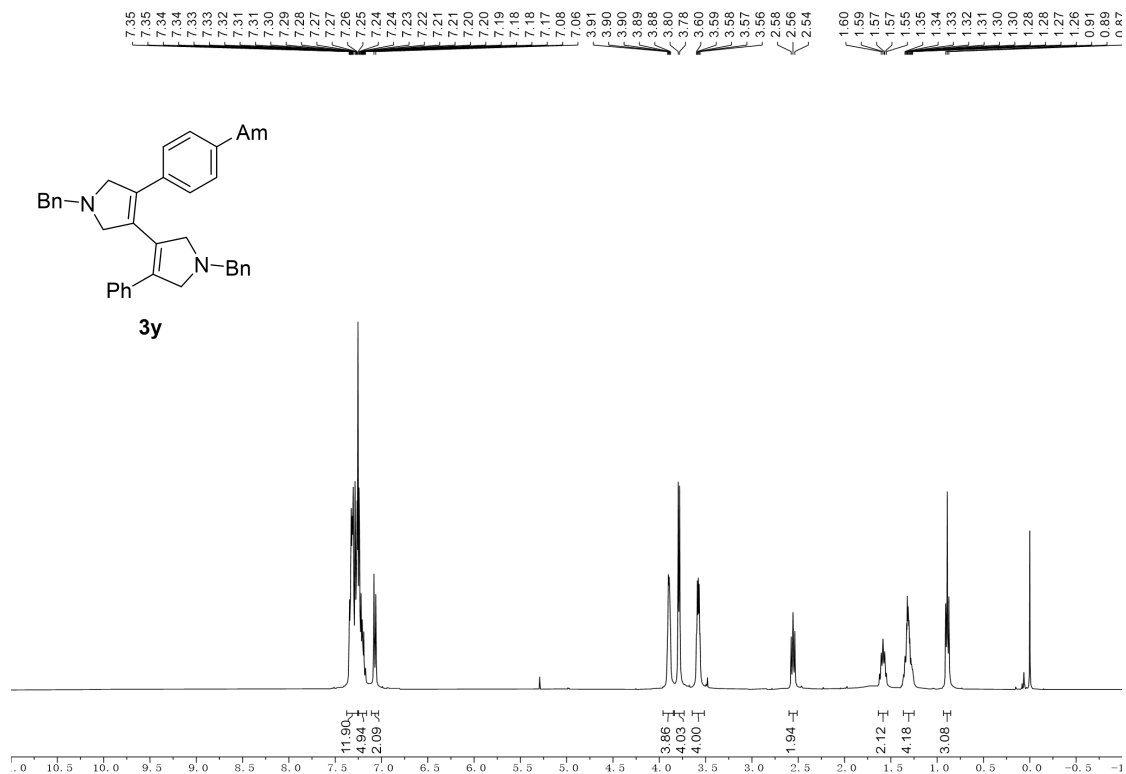

**$^{13}\text{C}\{^1\text{H}\}$  NMR (75 MHz,  $\text{CDCl}_3$ ) spectrum of compound **3y**:**

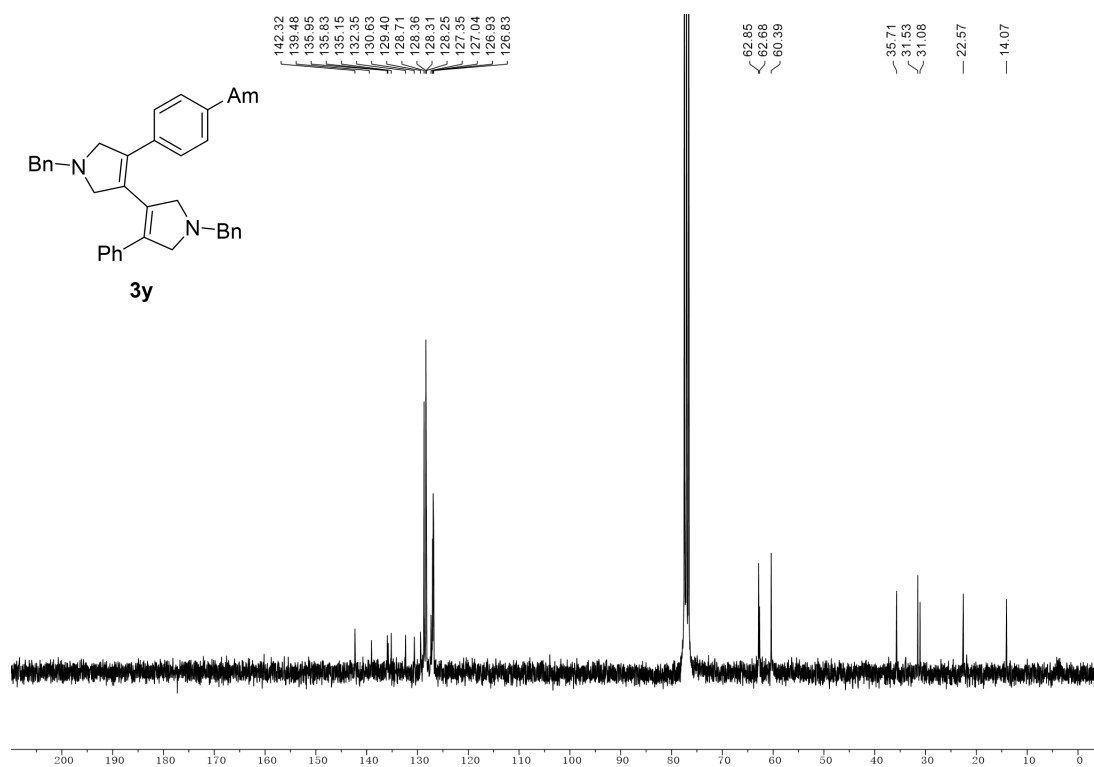

**$^1\text{H}$  NMR (400 MHz,  $\text{CDCl}_3$ ) spectra of compound **3z**:**

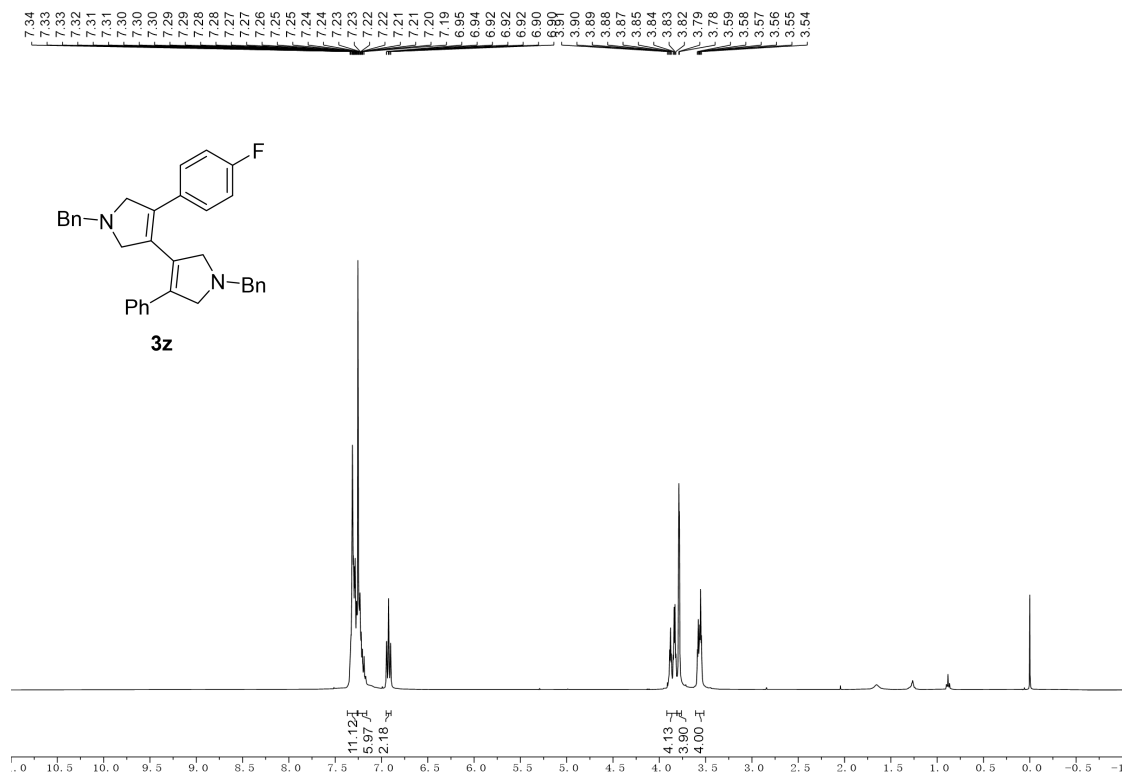

**$^{19}\text{F}\{^1\text{H}\}$  NMR (376 MHz,  $\text{CDCl}_3$ ) spectra of compound **3z**:**

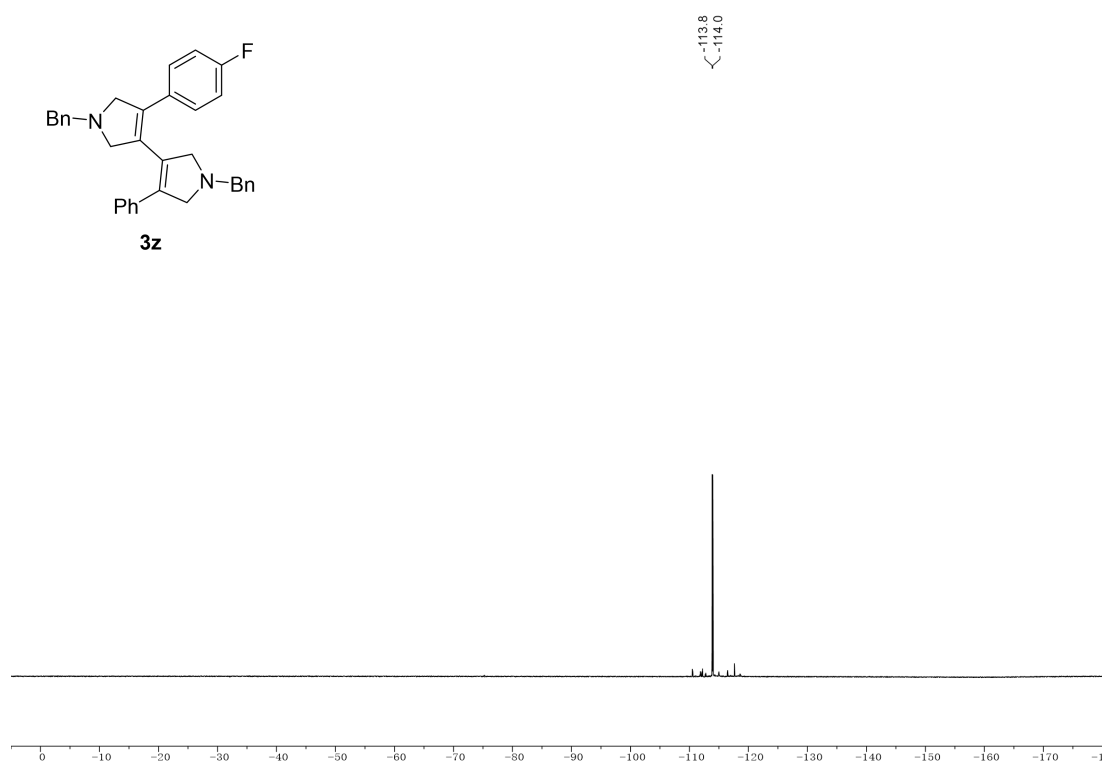

**$^{13}\text{C}\{^1\text{H}\}$  NMR (101 MHz,  $\text{CDCl}_3$ ) spectra of compound 3z:**

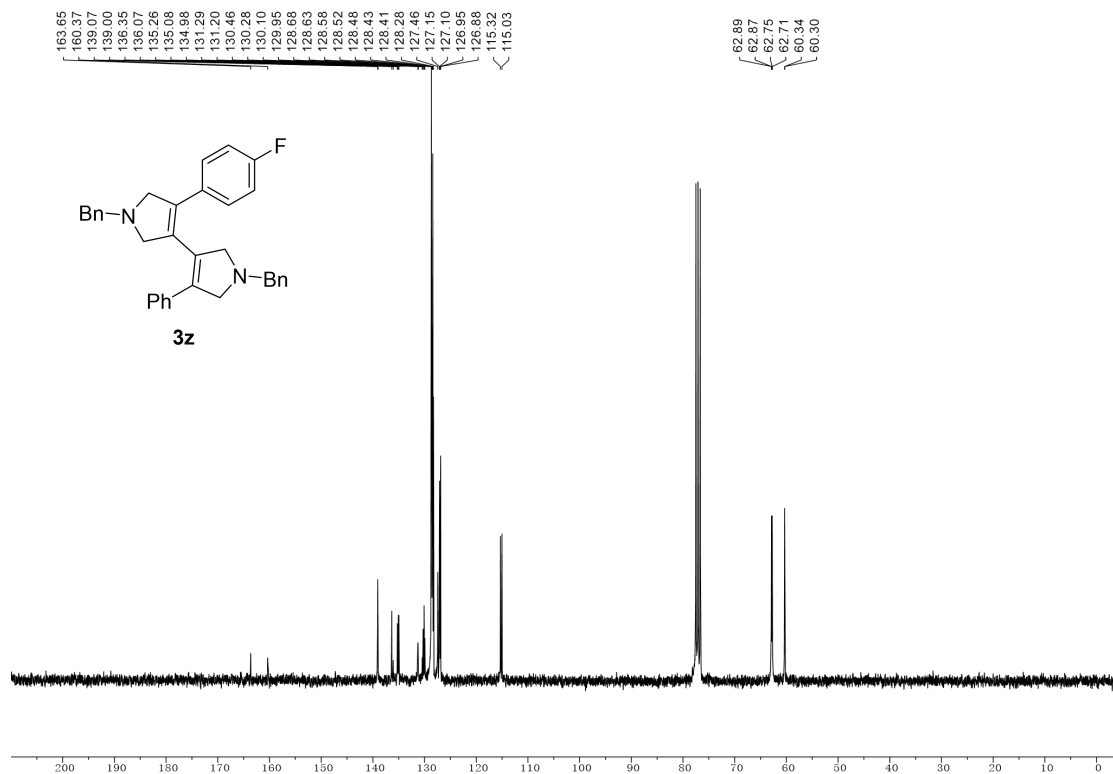

**$^1\text{H}$  NMR (400 MHz,  $\text{CDCl}_3$ ) spectrum of compound 3aa:**

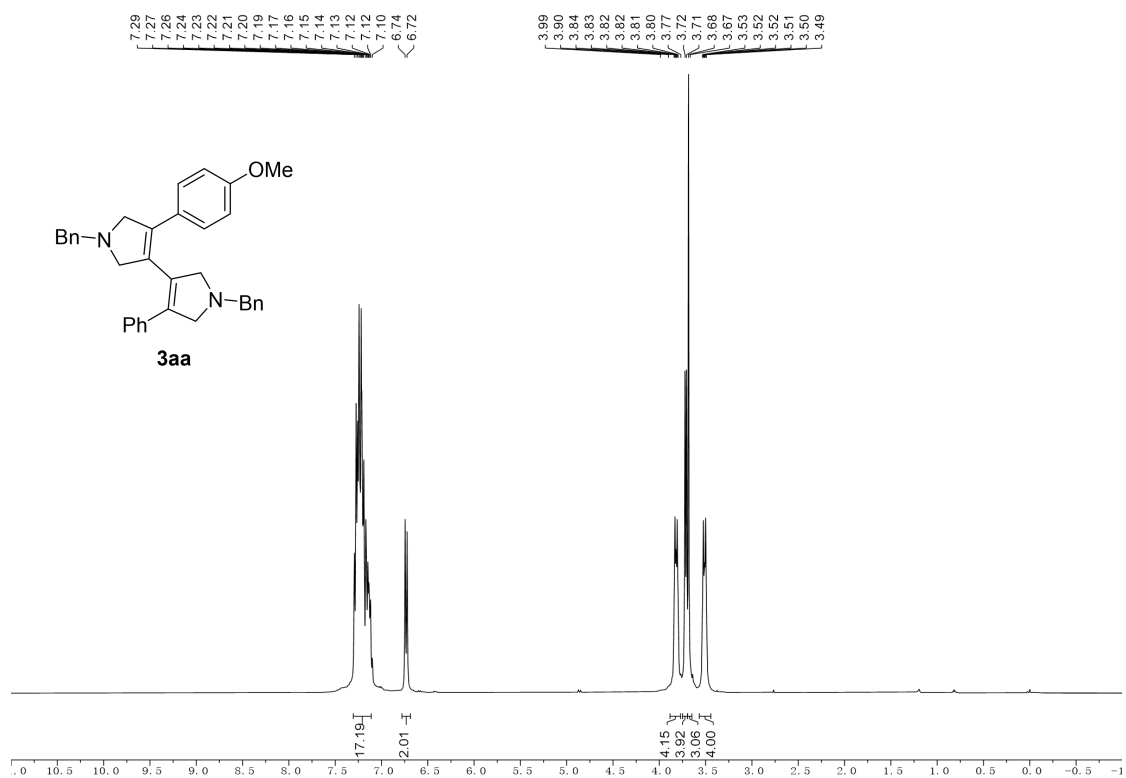

**$^{13}\text{C}\{^1\text{H}\}$  NMR (101 MHz,  $\text{CDCl}_3$ ) spectrum of compound 3aa:**

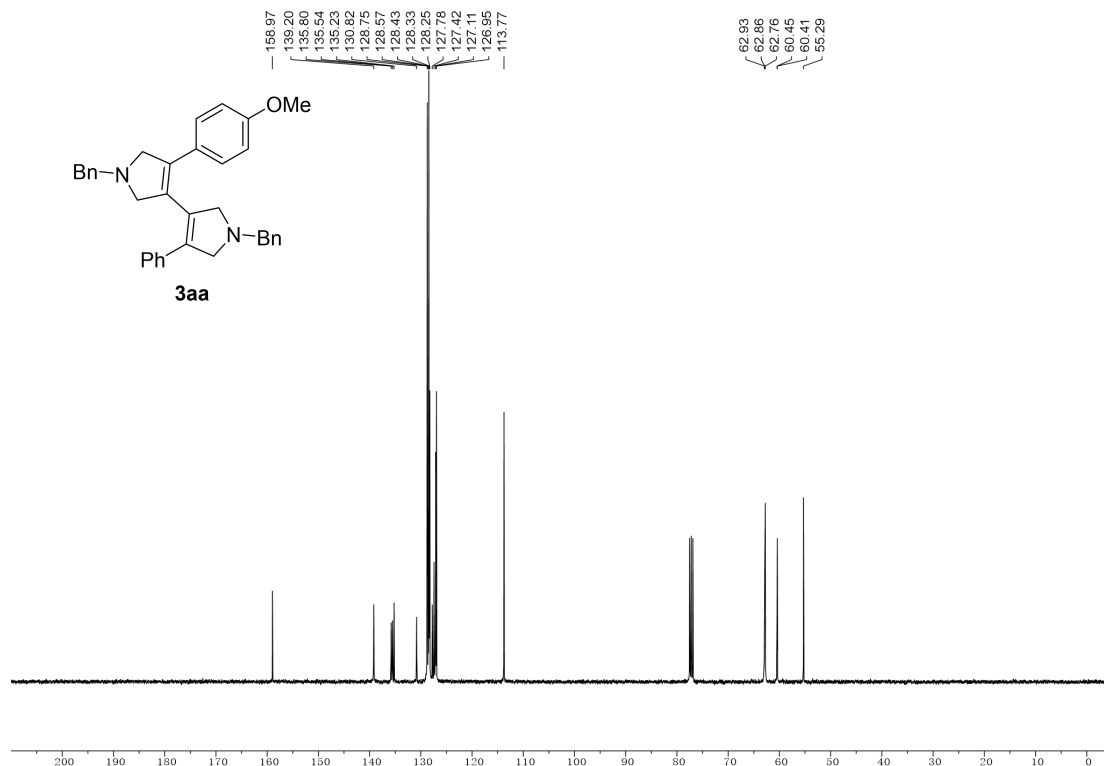

**$^1\text{H}$  NMR (400 MHz,  $\text{CDCl}_3$ ) spectrum of compound 3ab:**

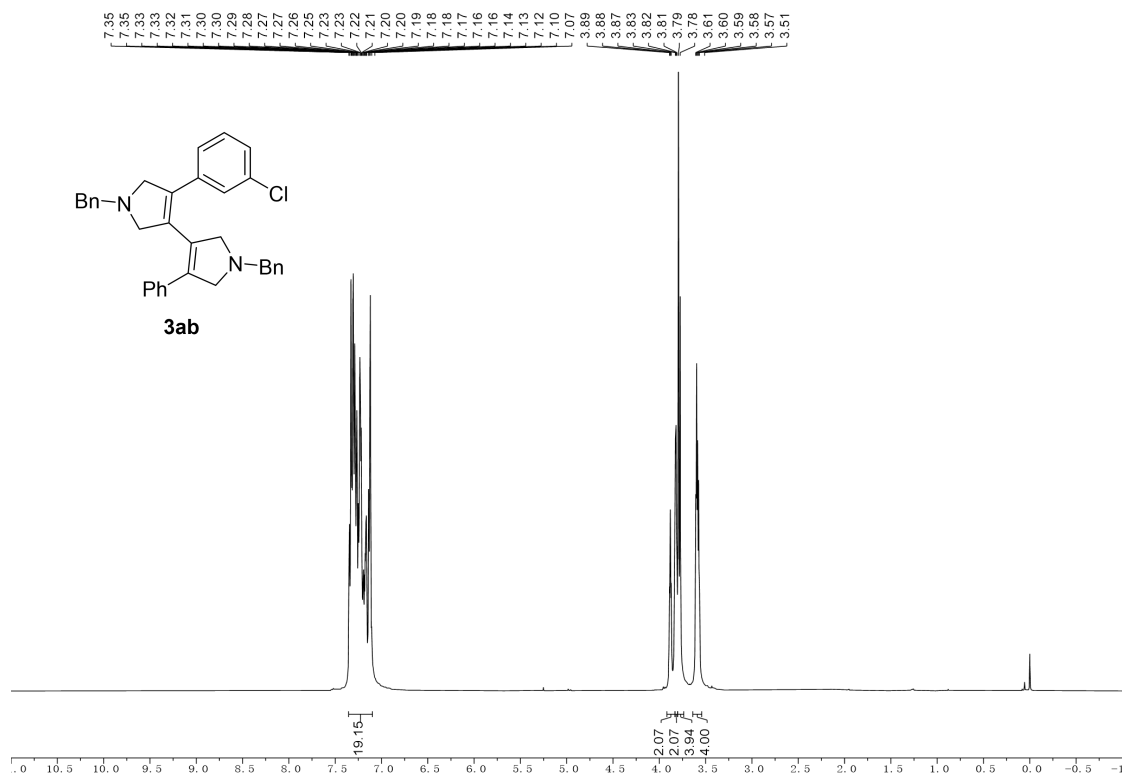

**$^{13}\text{C}\{^1\text{H}\}$  NMR (75 MHz,  $\text{CDCl}_3$ ) spectrum of compound **3ab**:**

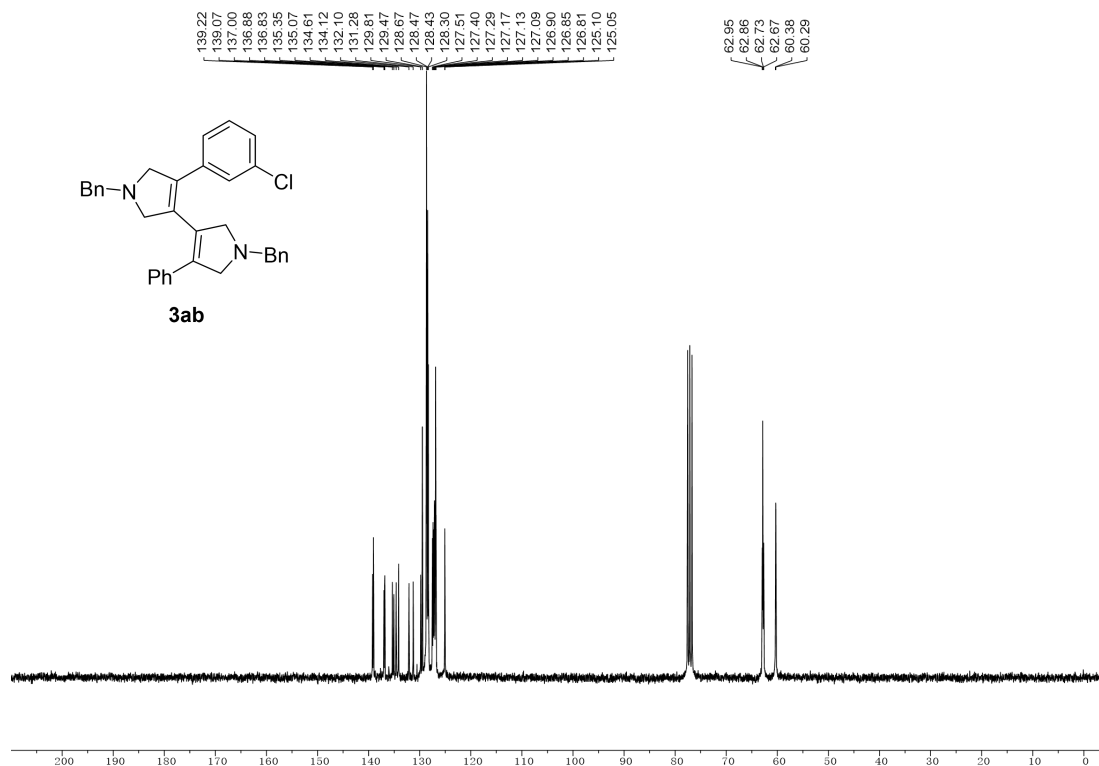

**$^1\text{H}$  NMR (400 MHz,  $\text{CDCl}_3$ ) spectra of compound **3ac**:**

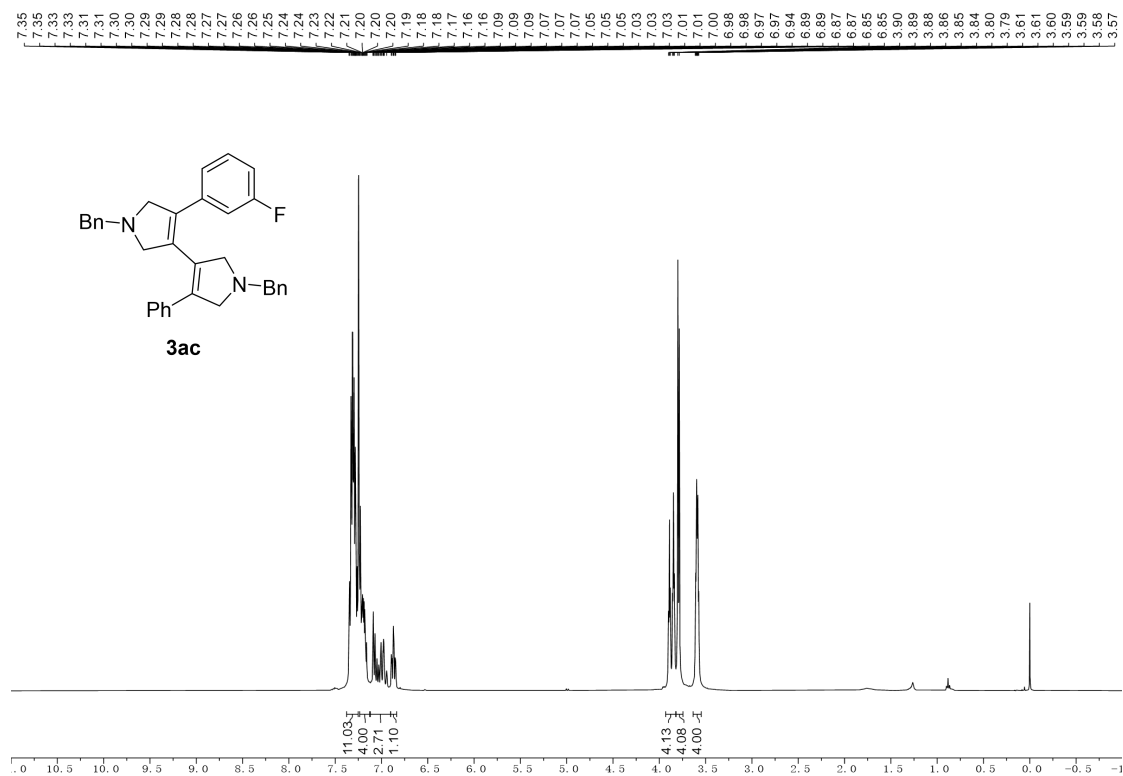

**$^{19}\text{F}\{^1\text{H}\}$  NMR (376 MHz,  $\text{CDCl}_3$ ) spectra of compound 3ac:**

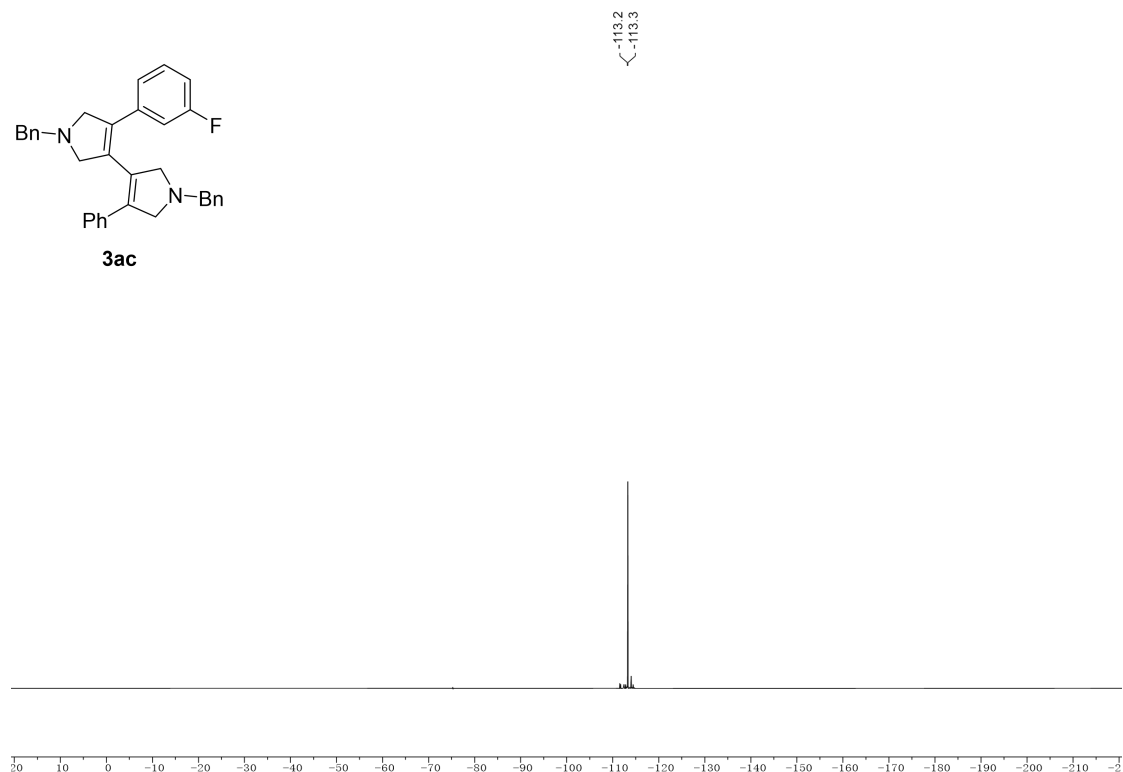

**$^{13}\text{C}\{^1\text{H}\}$  NMR (101 MHz,  $\text{CDCl}_3$ ) spectra of compound 3ac:**

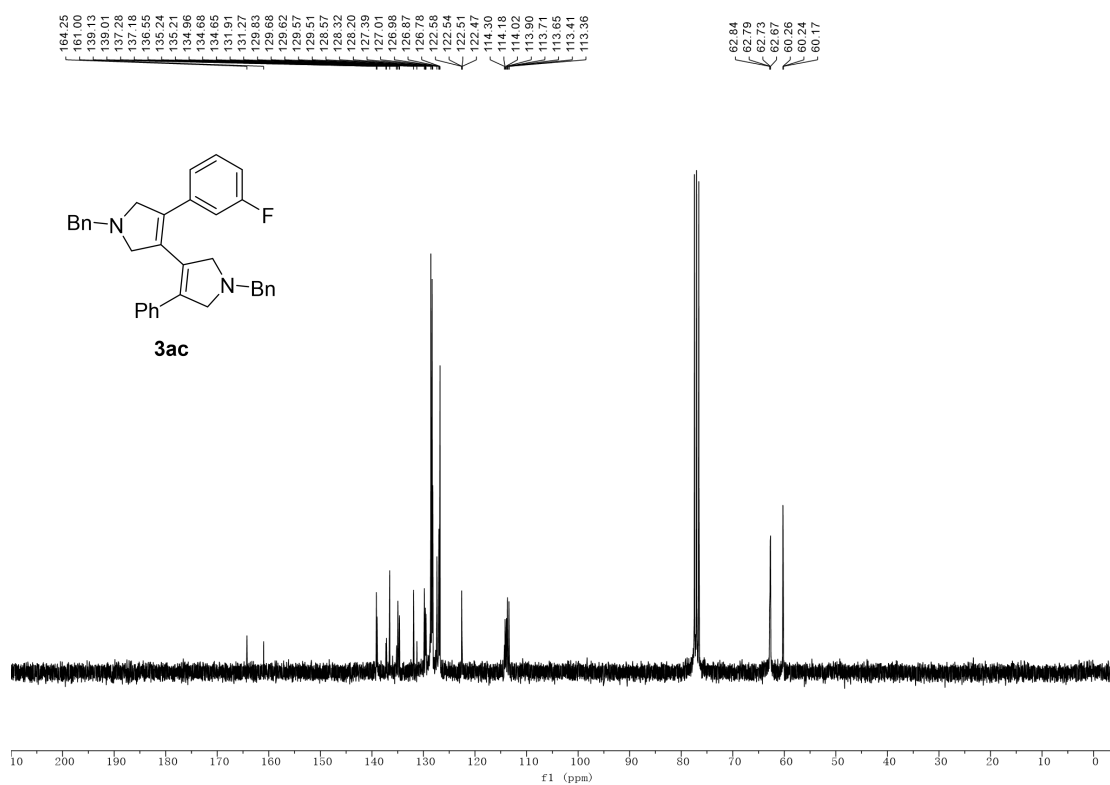

**$^1\text{H}$  NMR (400 MHz,  $\text{CDCl}_3$ ) spectrum of compound 3ad:**

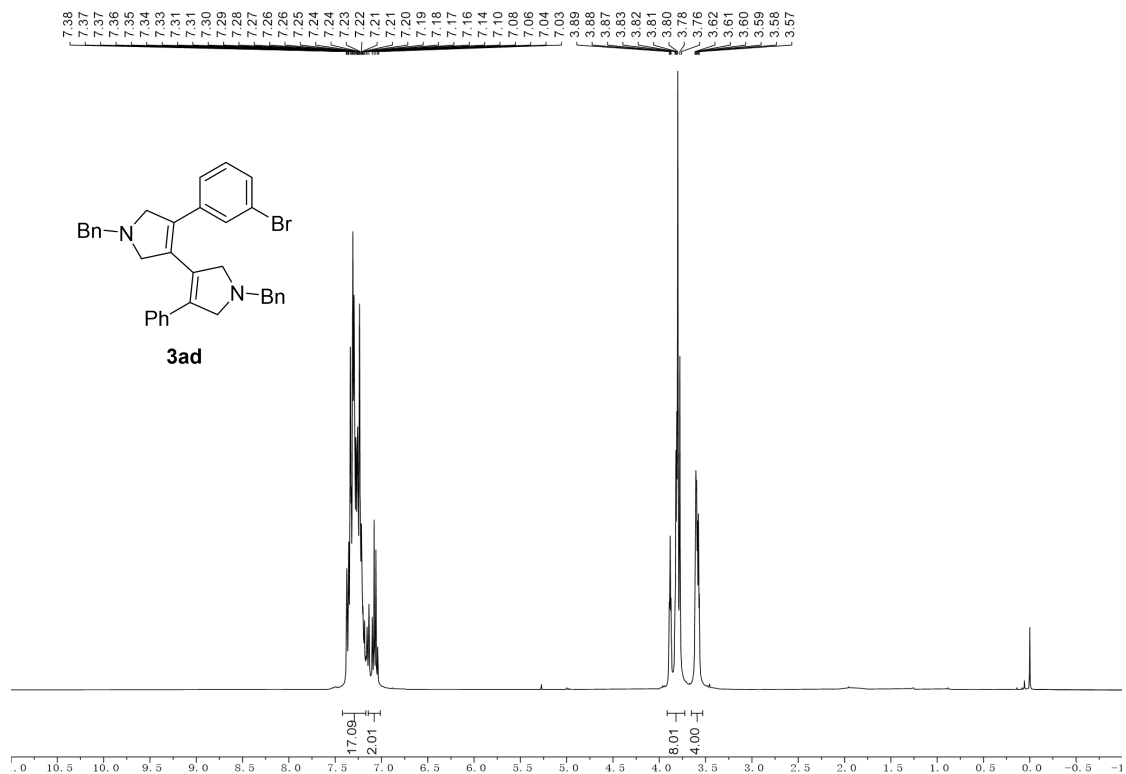

**$^{13}\text{C}\{^1\text{H}\}$  NMR (75 MHz,  $\text{CDCl}_3$ ) spectrum of compound 3ad:**

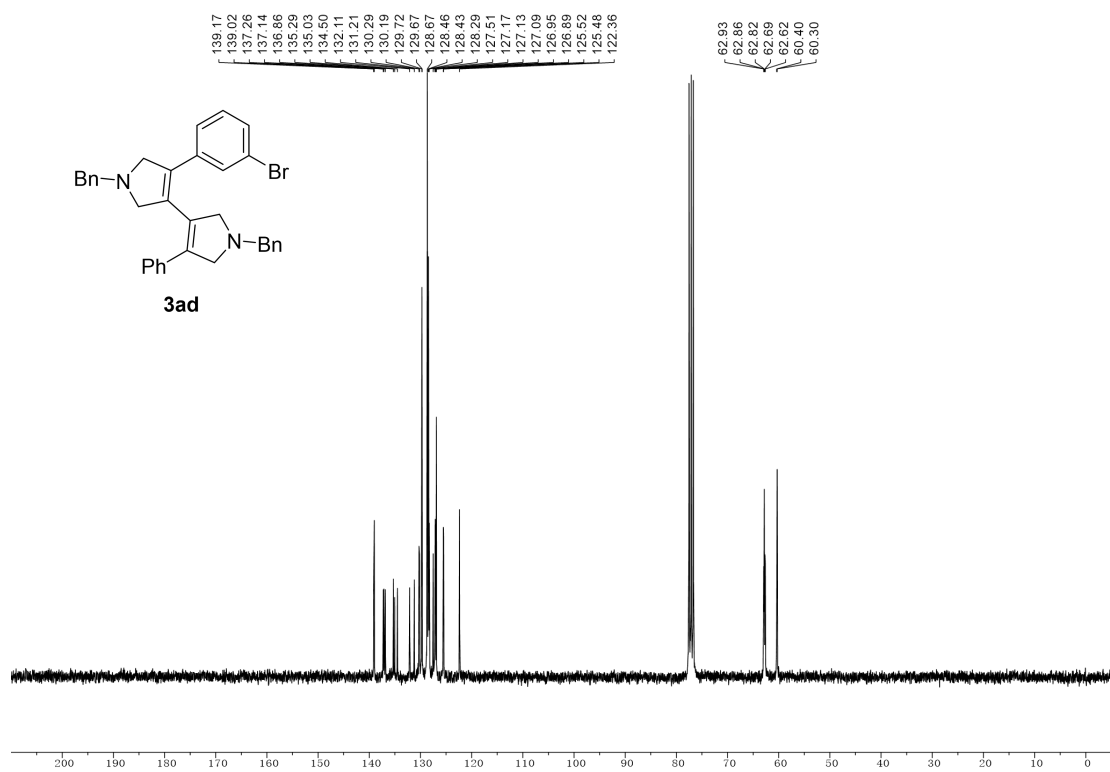

**$^1\text{H}$  NMR (400 MHz,  $\text{CDCl}_3$ ) spectrum of compound 3ae:**

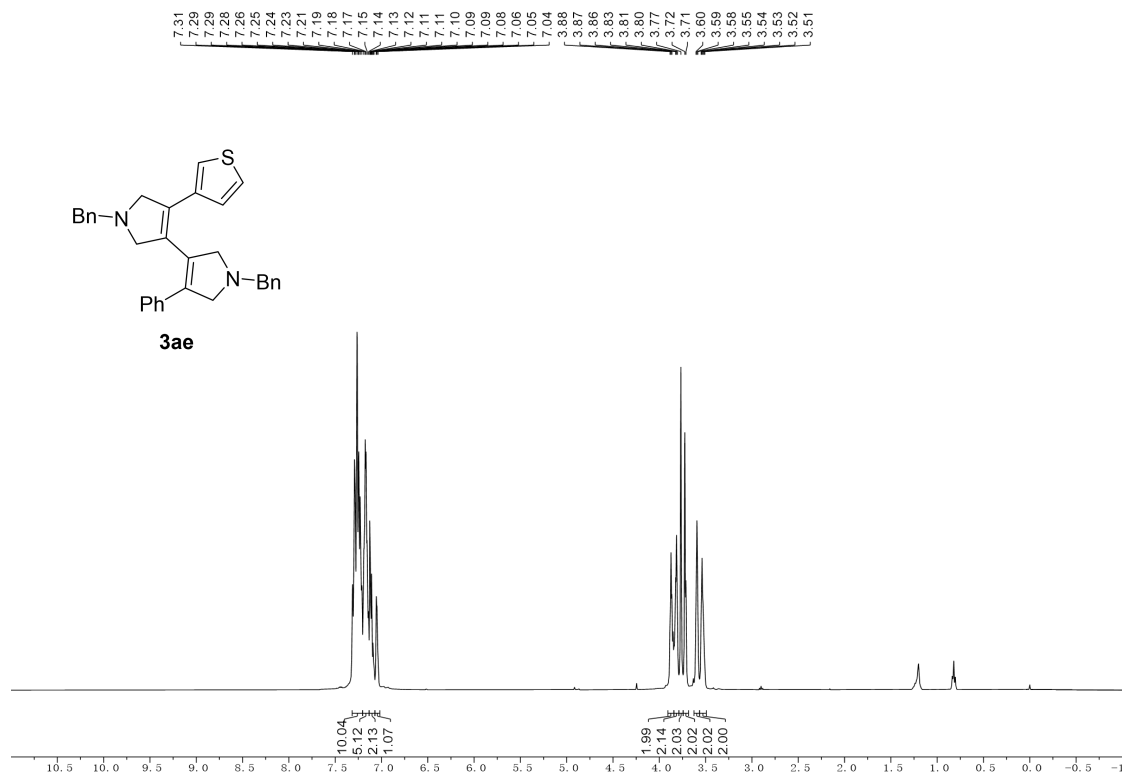

**$^{13}\text{C}\{^1\text{H}\}$  NMR (101 MHz,  $\text{CDCl}_3$ ) spectrum of compound 3ae:**

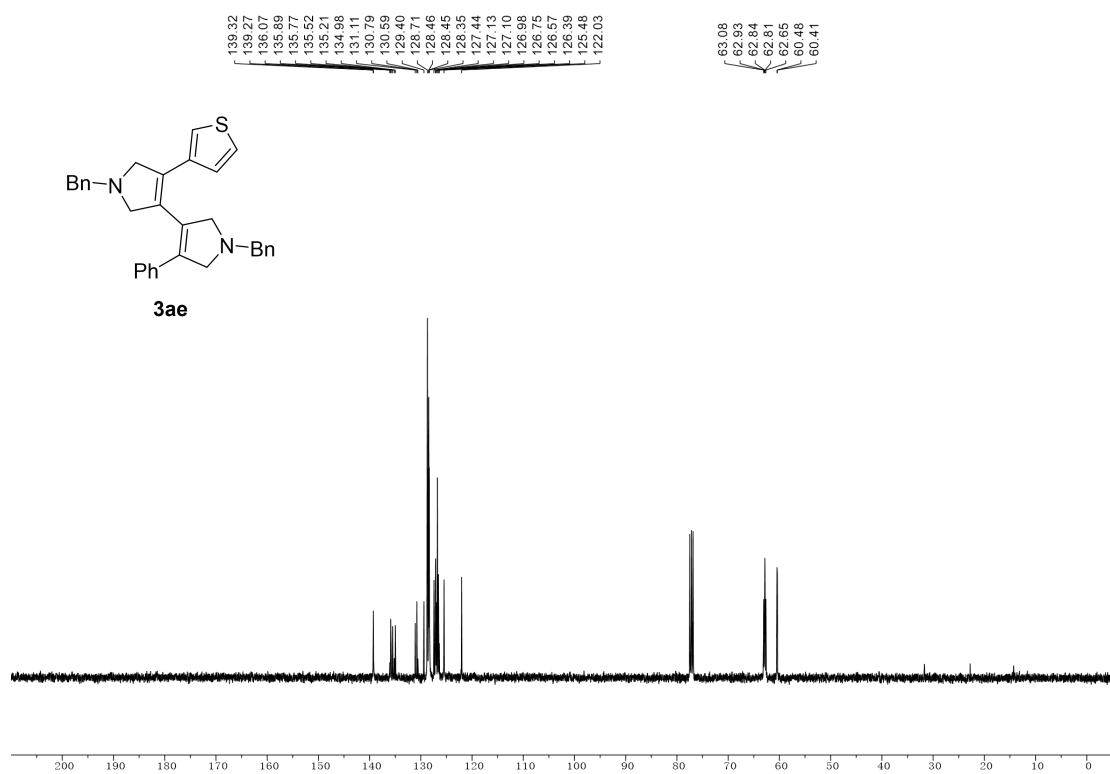



**$^1\text{H}$  NMR (400 MHz,  $\text{CDCl}_3$ ) spectra of compound 3af:**

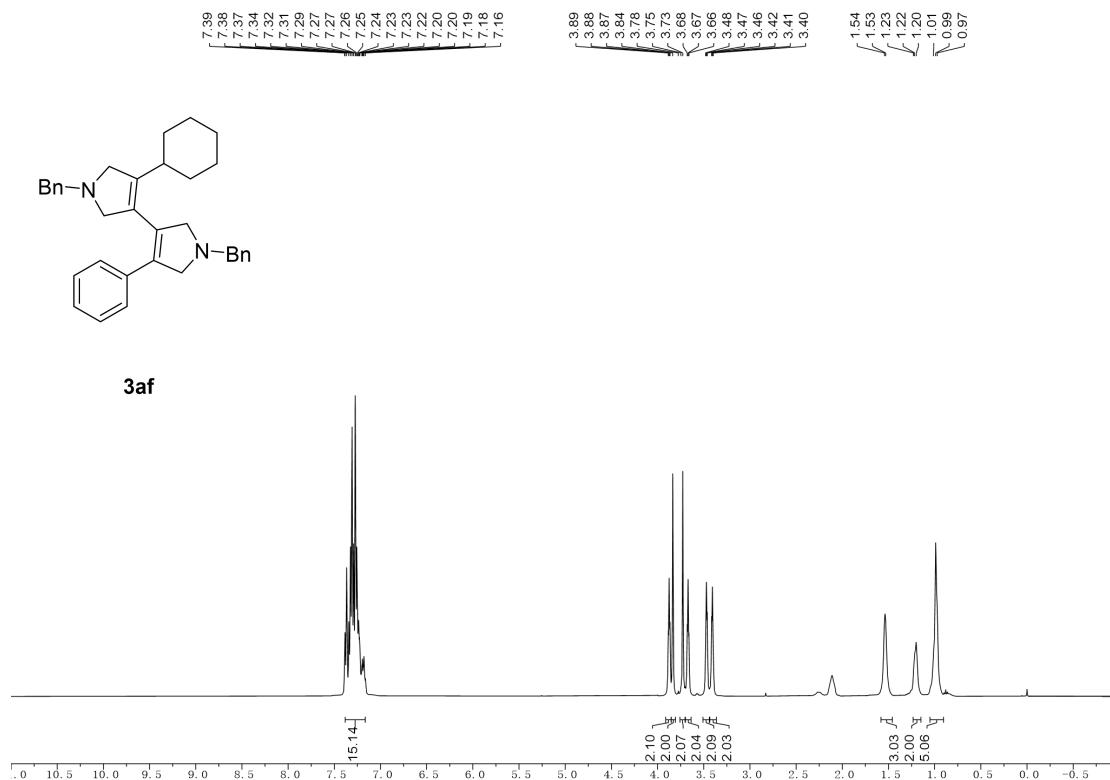

**$^{13}\text{C}\{^1\text{H}\}$  NMR (101 MHz,  $\text{CDCl}_3$ ) spectra of compound 3af:**

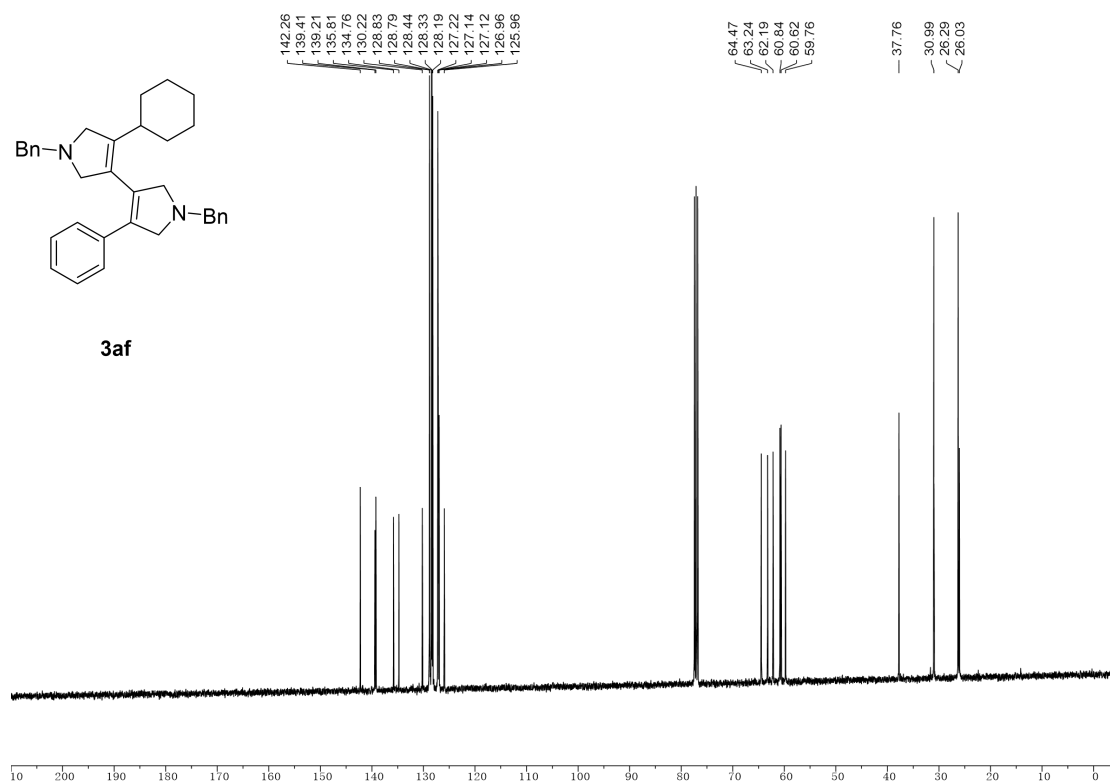

**$^1\text{H}$  NMR (400 MHz,  $\text{CDCl}_3$ ) spectra of compound **3ag**:**

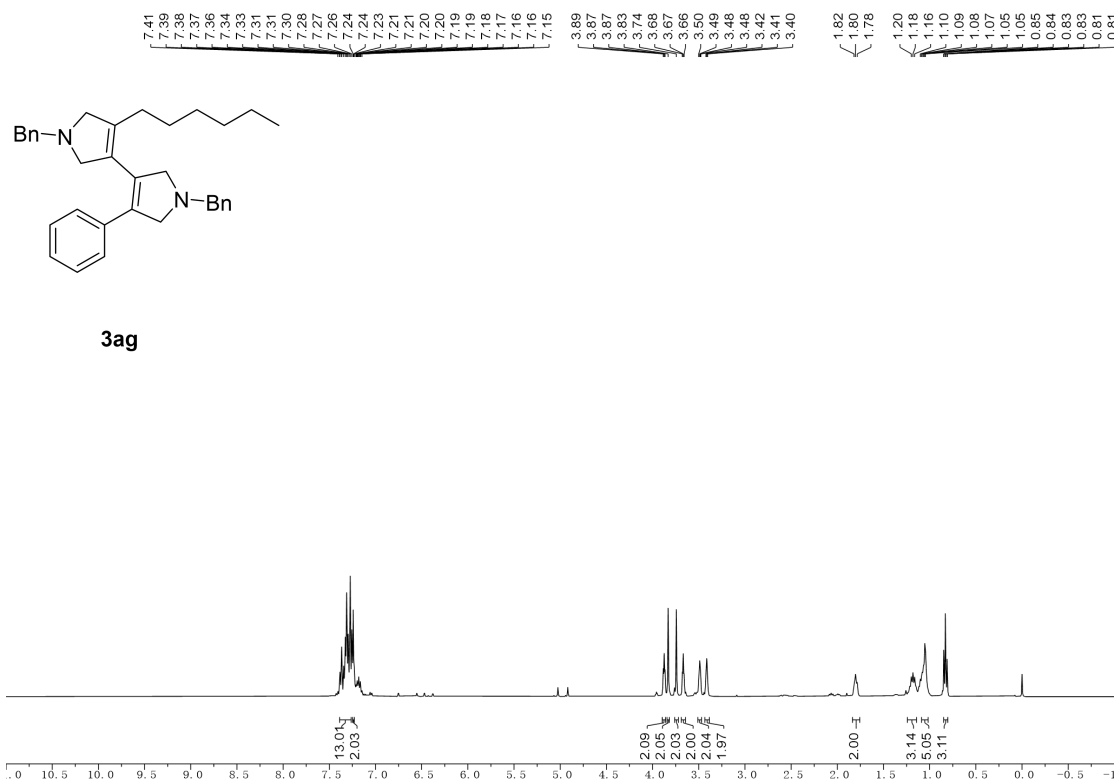

**$^{13}\text{C}\{^1\text{H}\}$  NMR (101 MHz,  $\text{CDCl}_3$ ) spectra of compound **3ag**:**

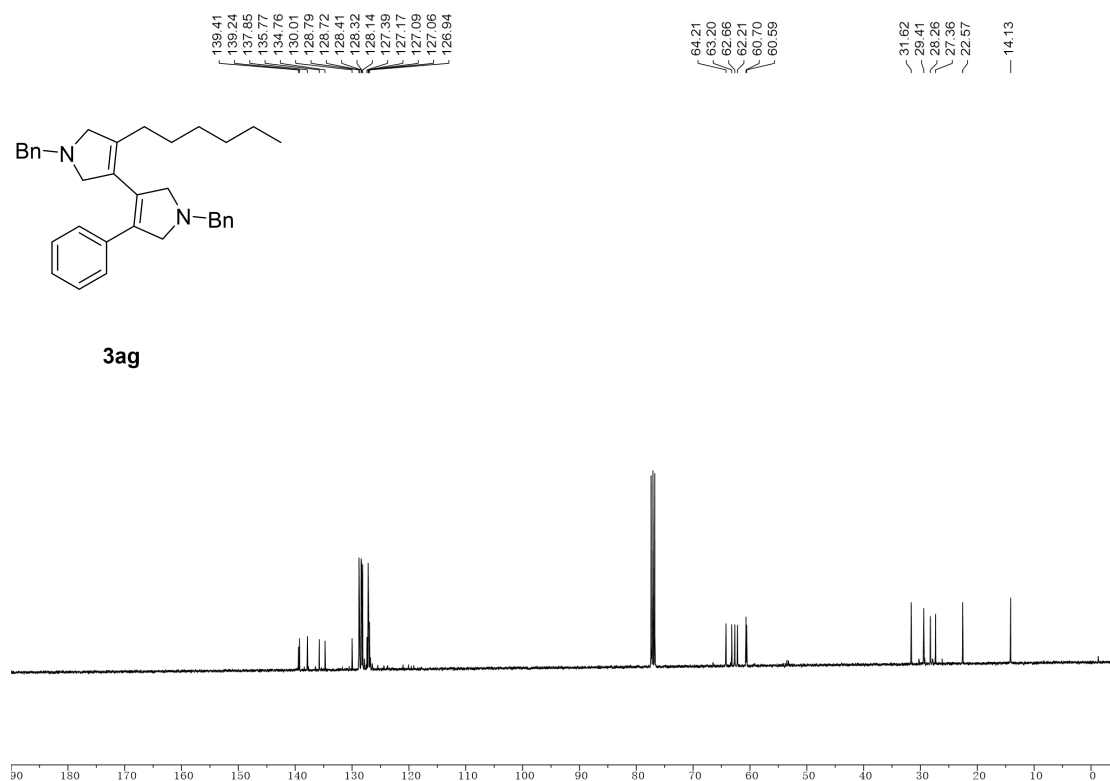

**$^1\text{H}$  NMR (300 MHz,  $\text{CDCl}_3$ ) spectra of compound 3ah:**

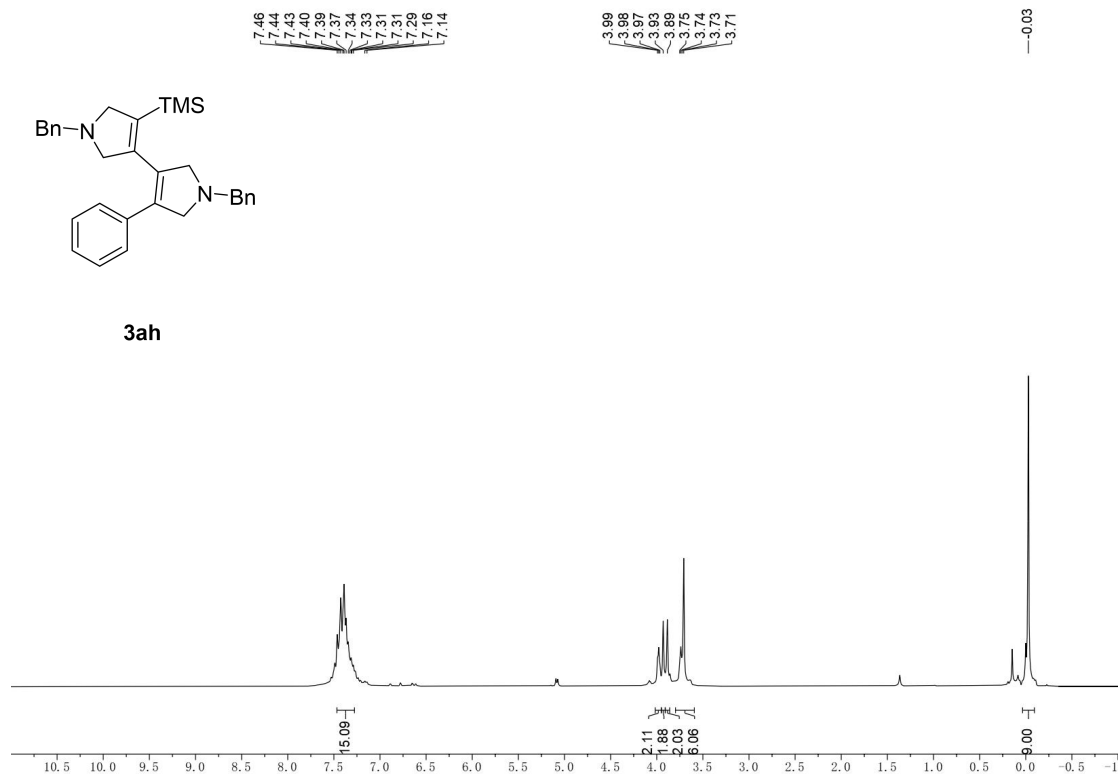

**$^{13}\text{C}\{^1\text{H}\}$  NMR (75 MHz,  $\text{CDCl}_3$ ) spectra of compound 3ah:**

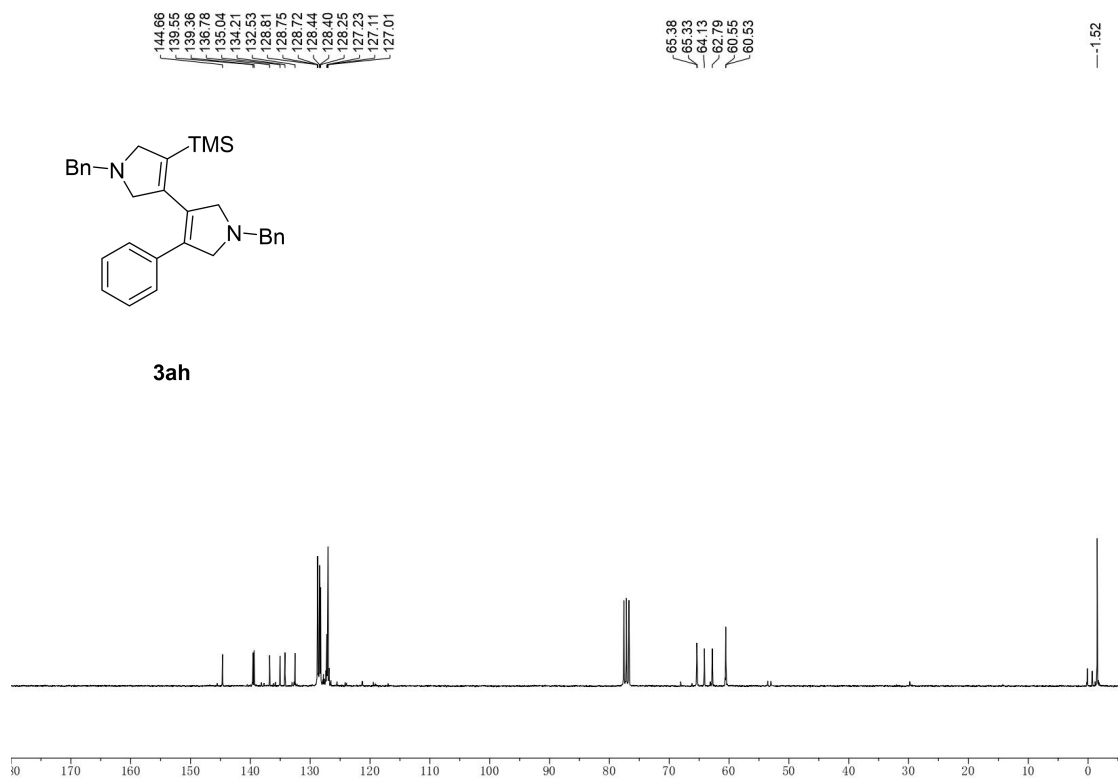

**$^1\text{H}$  NMR (300 MHz,  $\text{CDCl}_3$ ) spectra of compound 3ai:**

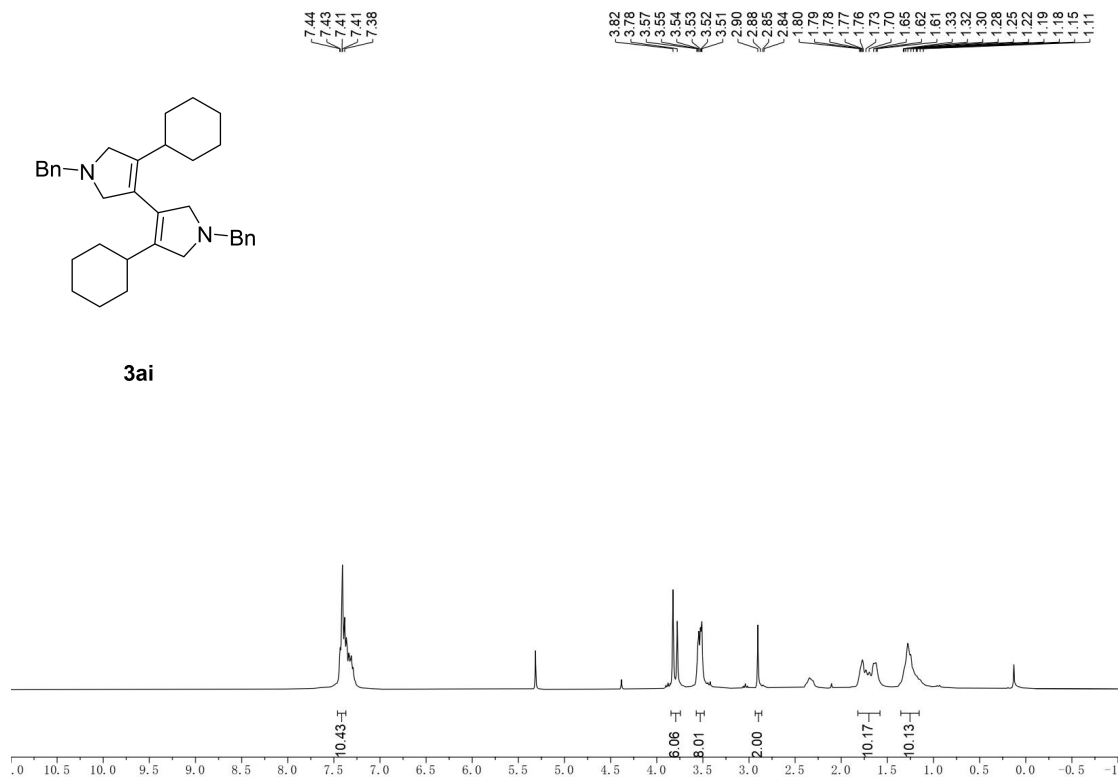

**$^{13}\text{C}\{^1\text{H}\}$  NMR (75 MHz,  $\text{CDCl}_3$ ) spectra of compound 3ai:**

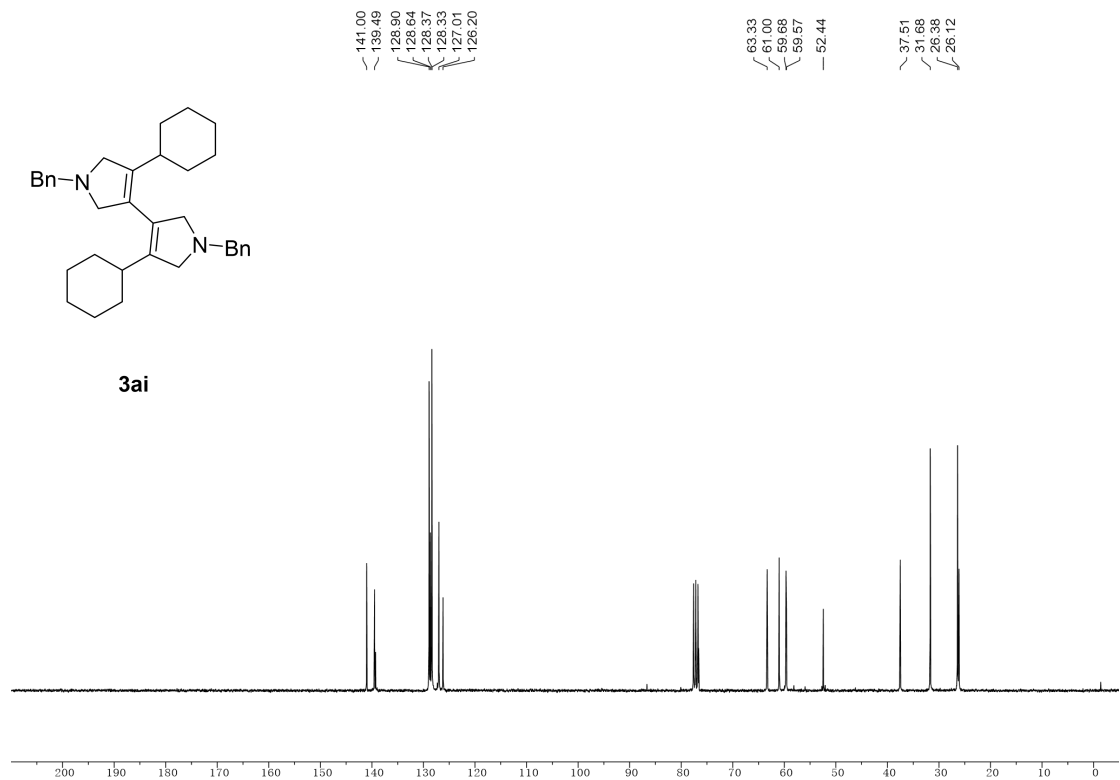

## 15. NMR spectra copies of the compounds 4.

<sup>1</sup>H NMR (400 MHz, CDCl<sub>3</sub>) spectra of compound 4a:

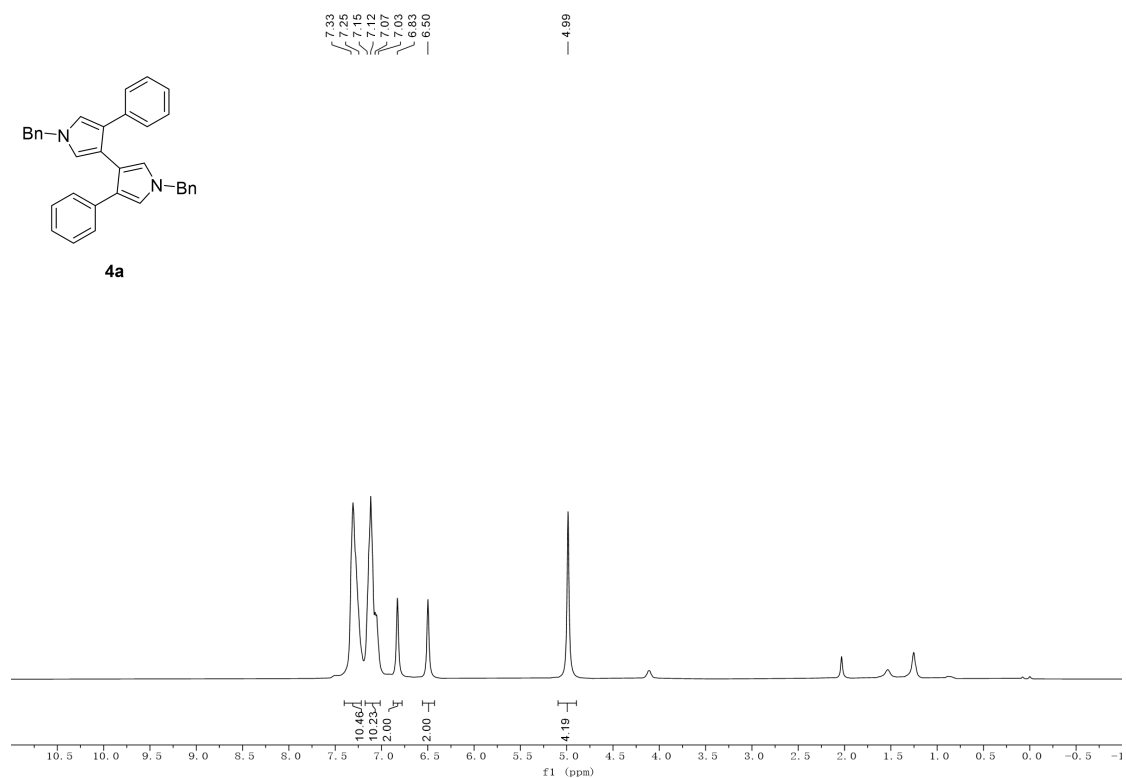

<sup>13</sup>C{<sup>1</sup>H} NMR (101 MHz, CDCl<sub>3</sub>) spectra of compound 4a:

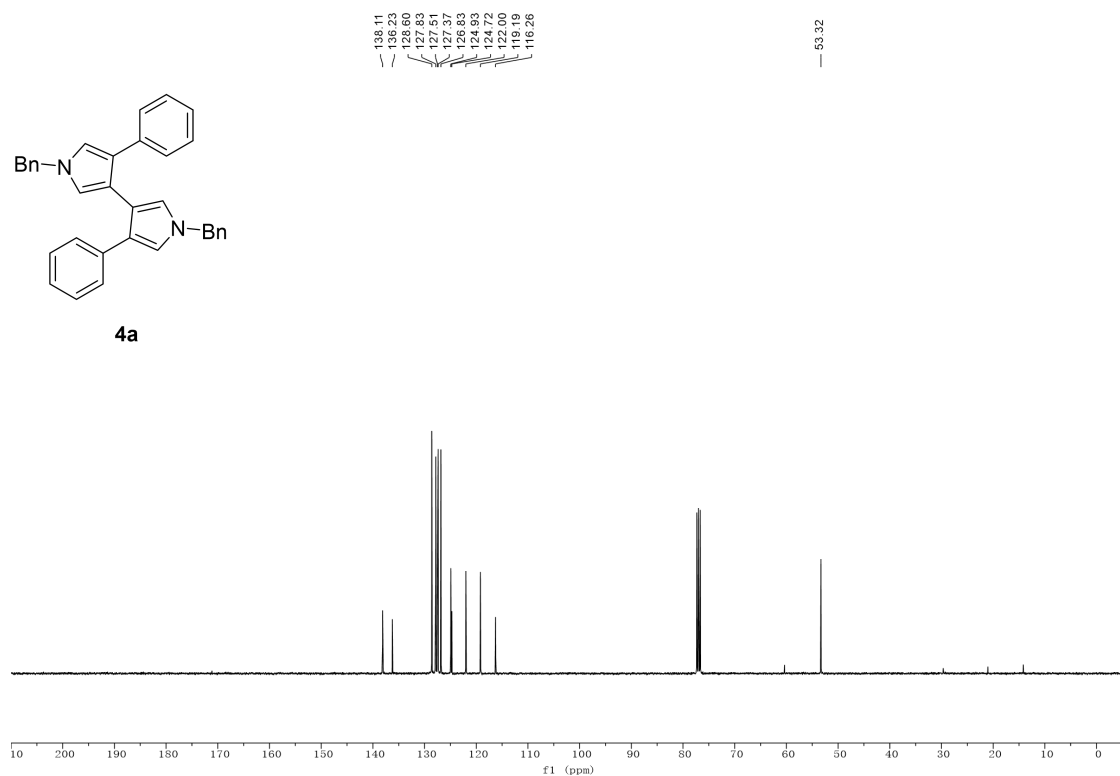

**$^1\text{H}$  NMR (400 MHz,  $\text{CDCl}_3$ ) spectra of compound 4b:**

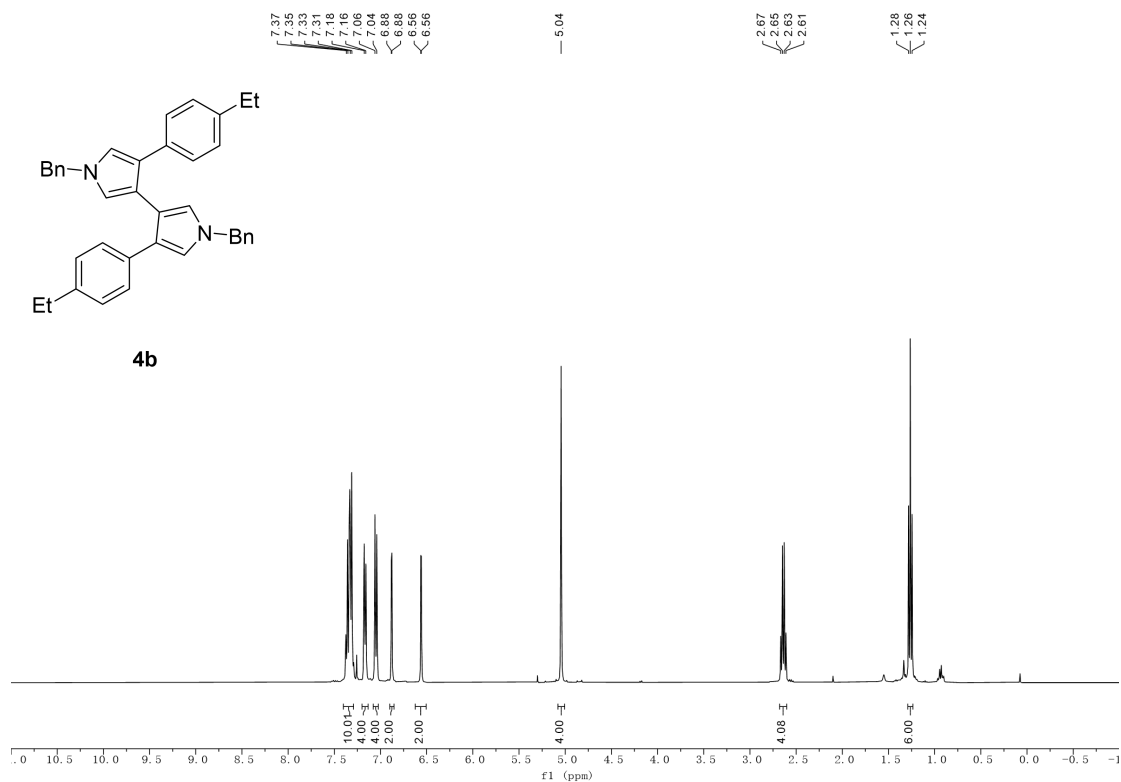

**$^{13}\text{C}\{^1\text{H}\}$  NMR (101 MHz,  $\text{CDCl}_3$ ) spectra of compound 4b:**

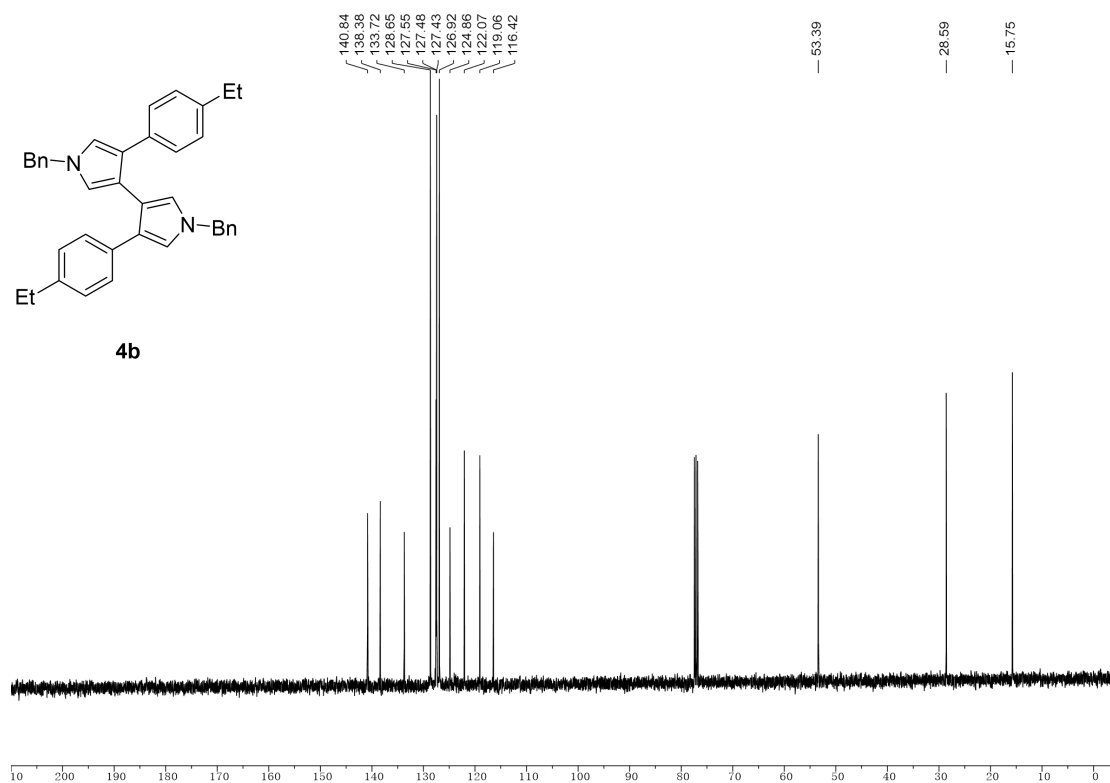

**$^1\text{H}$  NMR (400 MHz,  $\text{CDCl}_3$ ) spectra of compound 4c:**

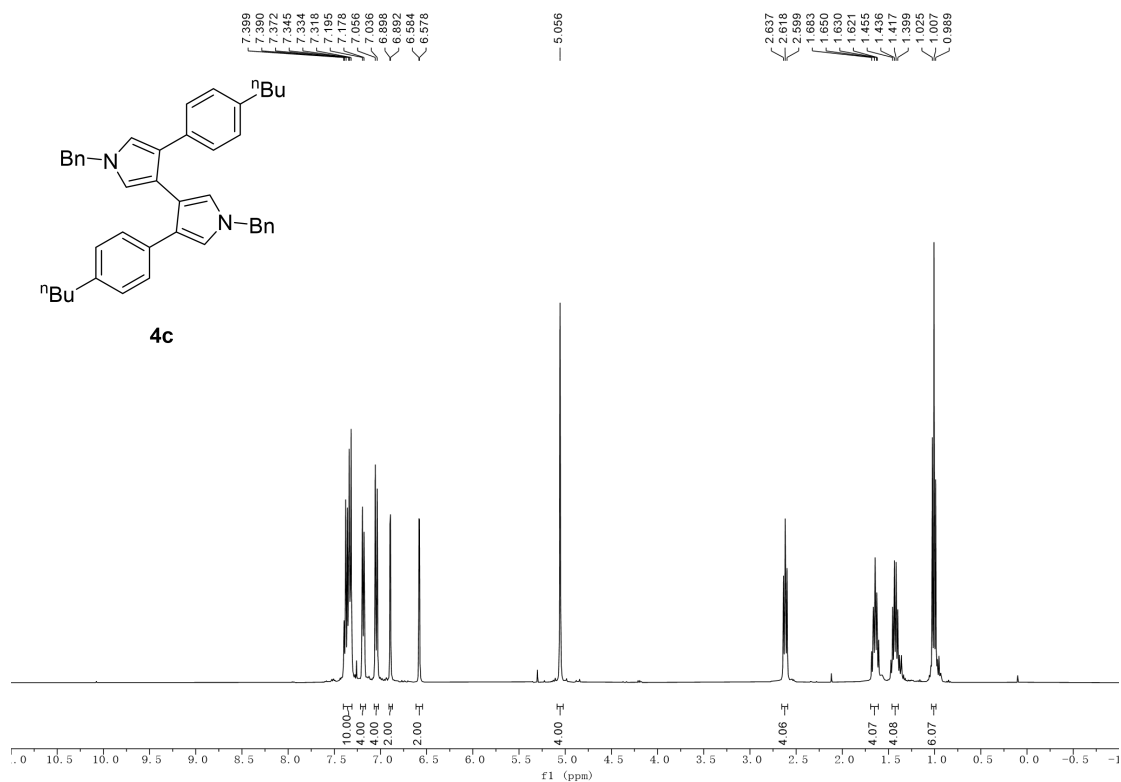

**$^{13}\text{C}\{^1\text{H}\}$  NMR (101 MHz,  $\text{CDCl}_3$ ) spectra of compound 4c:**

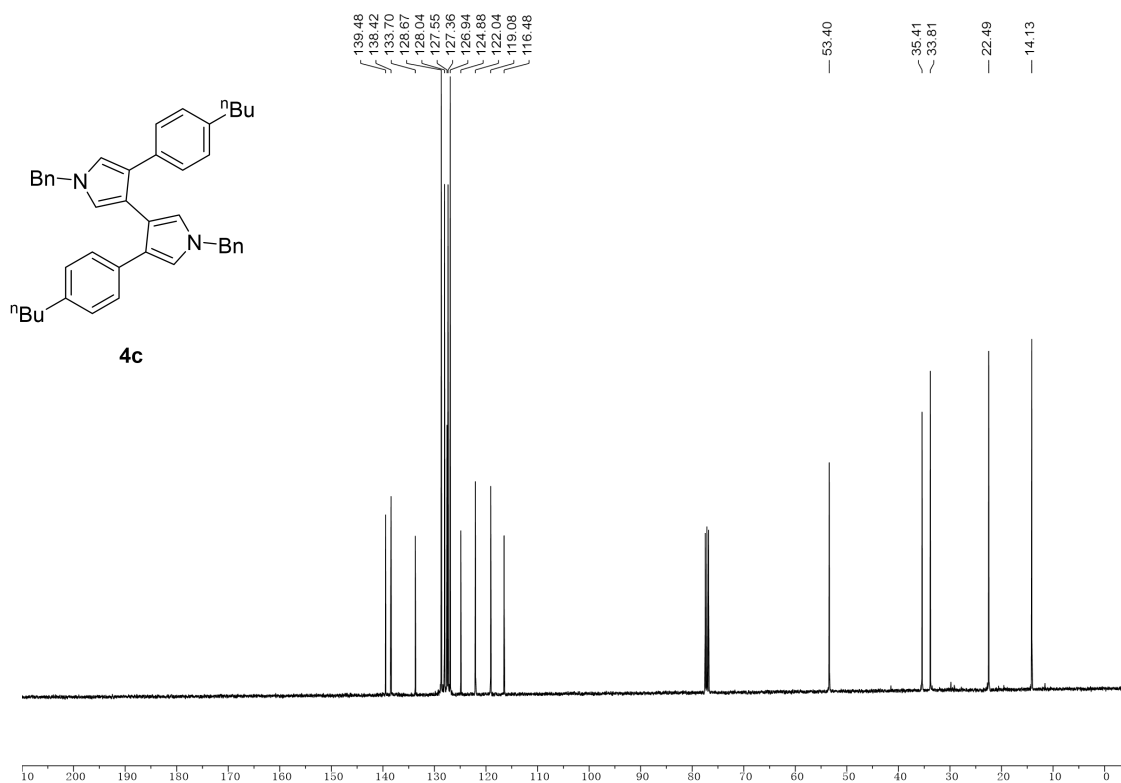

**<sup>1</sup>H NMR (400 MHz, CDCl<sub>3</sub>) spectra of compound 4d:**

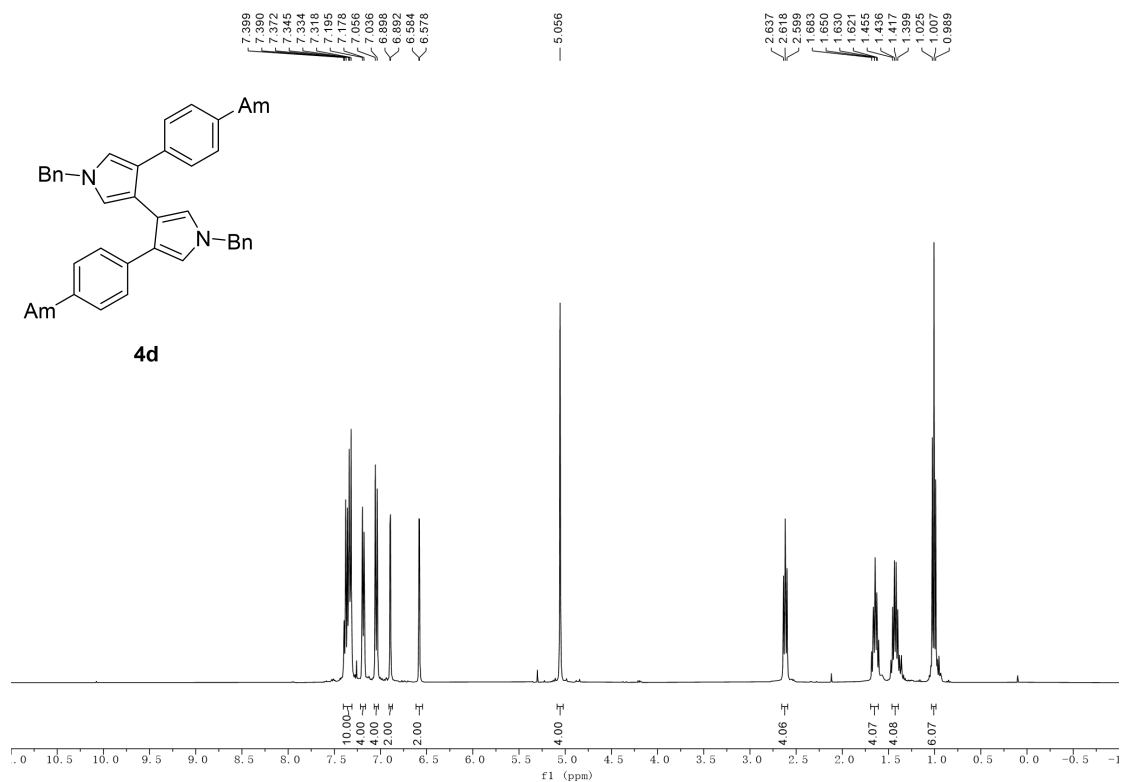

**<sup>13</sup>C{<sup>1</sup>H} NMR (101 MHz, CDCl<sub>3</sub>) spectra of compound 4d:**

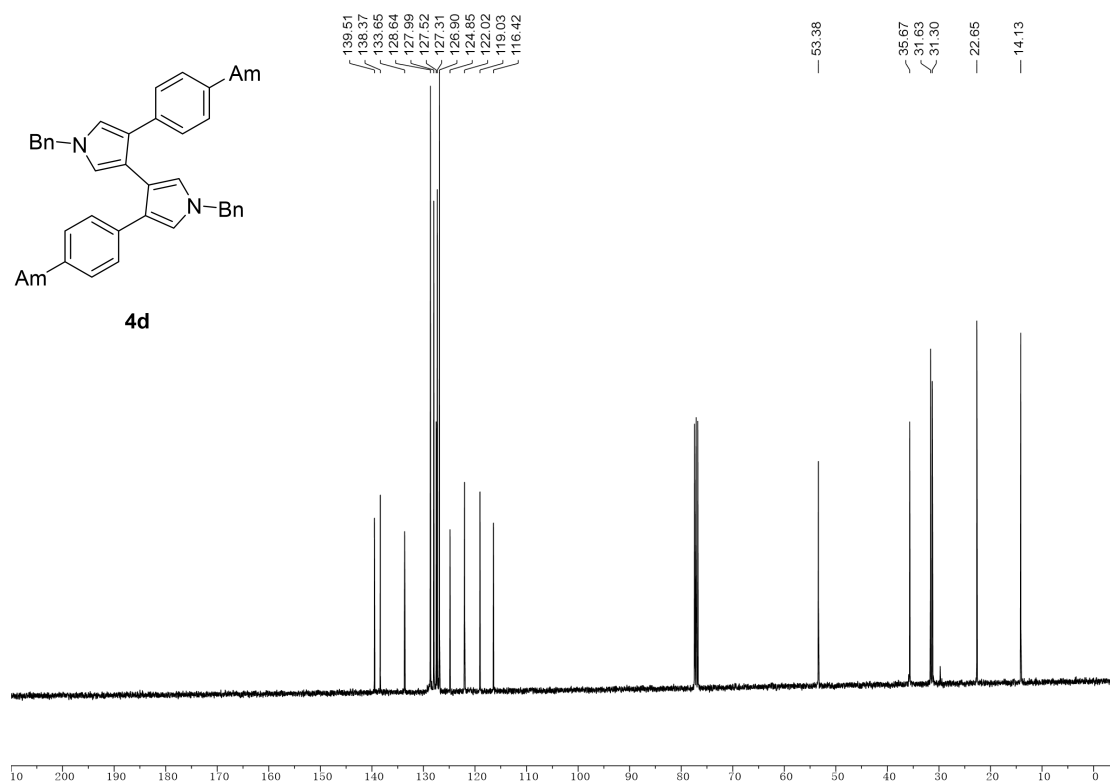



**$^1\text{H}$  NMR (400 MHz,  $\text{CDCl}_3$ ) spectra of compound 4e:**

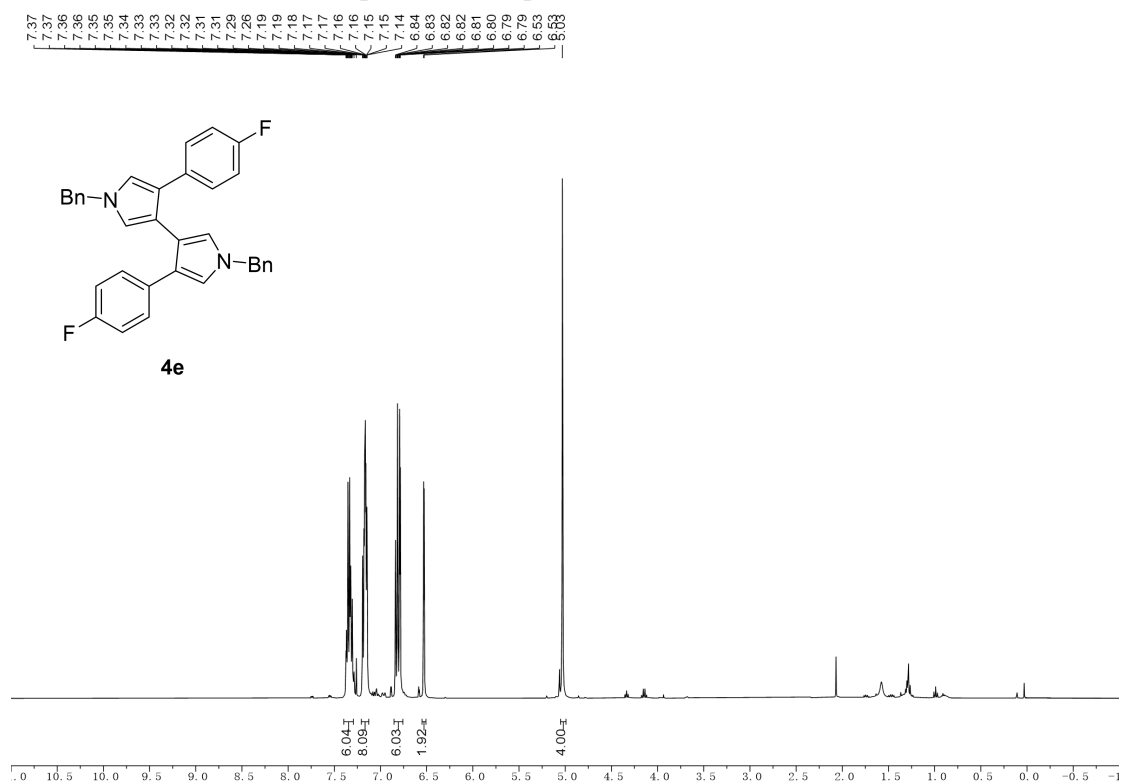

**$^{19}\text{F}\{^1\text{H}\}$  NMR (376 MHz,  $\text{CDCl}_3$ ) spectra of compound 4e:**

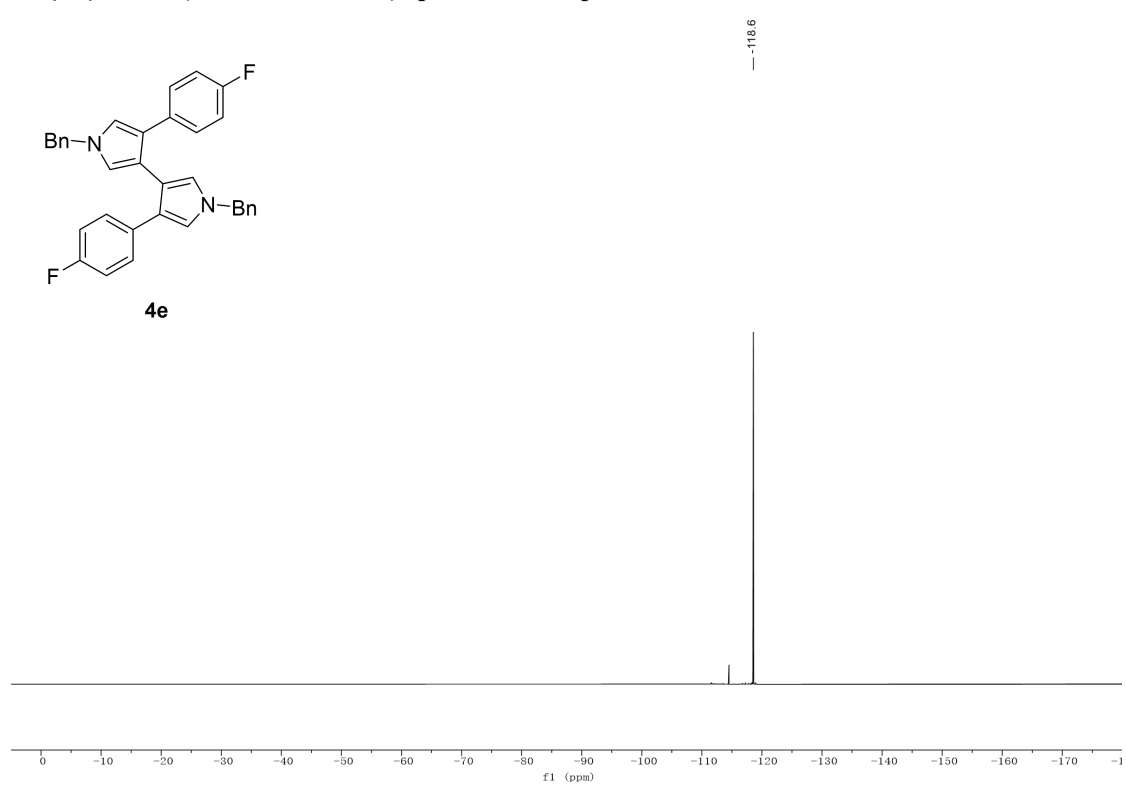

**$^{13}\text{C}\{^1\text{H}\}$  NMR (101 MHz,  $\text{CDCl}_3$ ) spectra of compound 4e:**

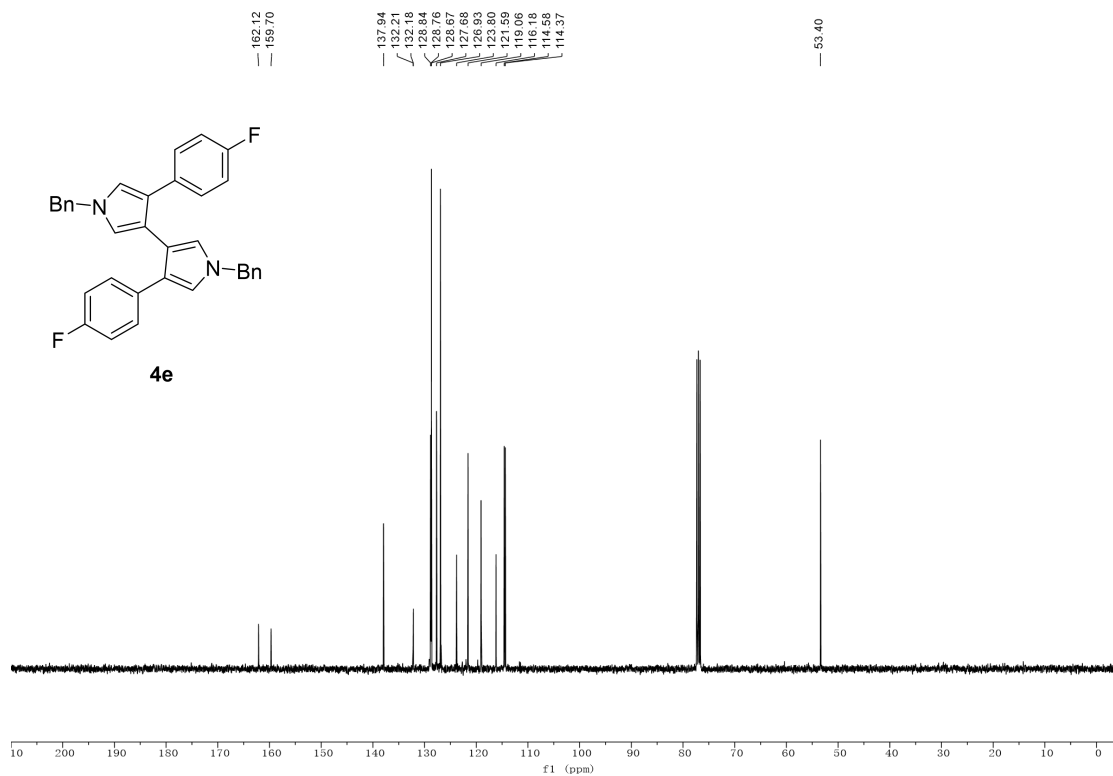

**$^1\text{H}$  NMR (400 MHz,  $\text{CDCl}_3$ ) spectra of compound 4f:**

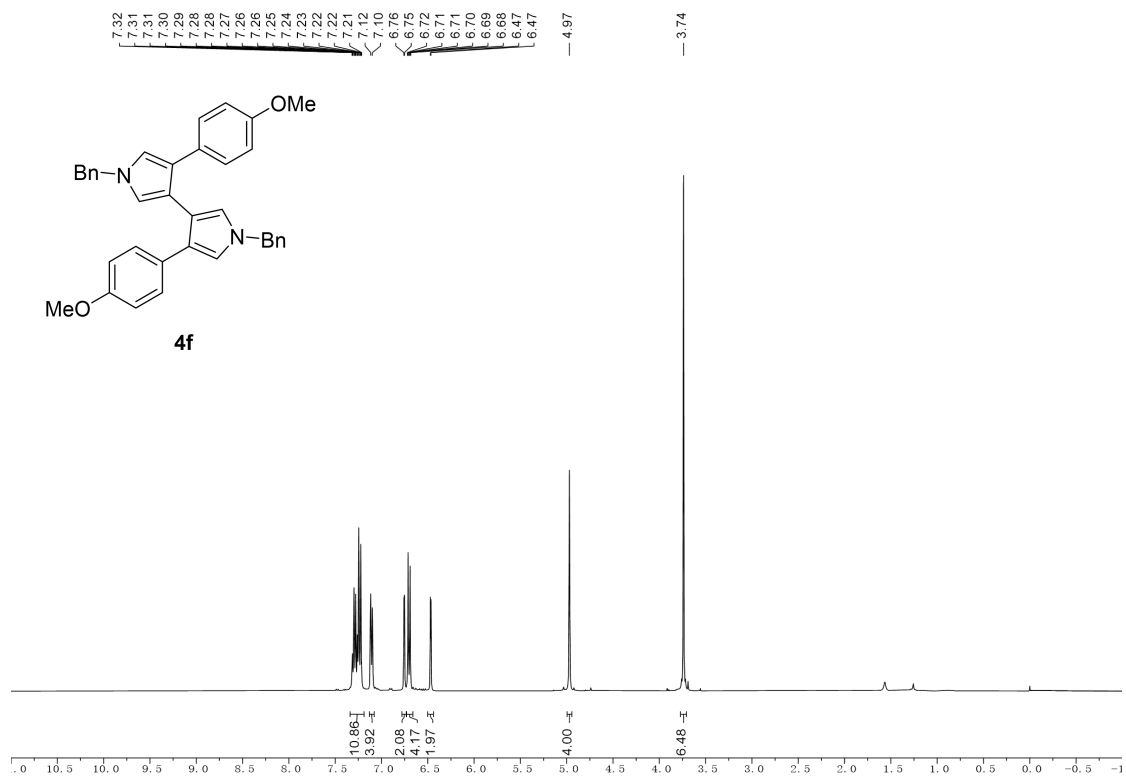

**$^{13}\text{C}\{^1\text{H}\}$  NMR (101 MHz,  $\text{CDCl}_3$ ) spectra of compound 4f:**

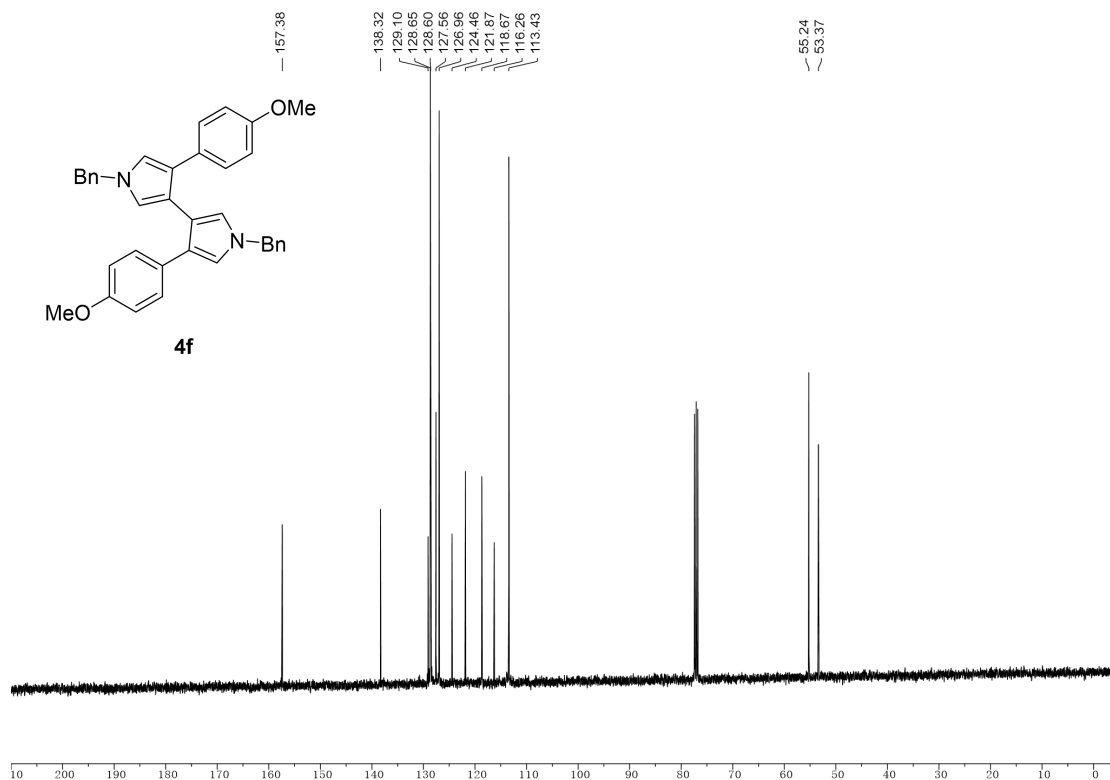

**$^1\text{H}$  NMR (400 MHz,  $\text{CDCl}_3$ ) spectra of compound 4g:**

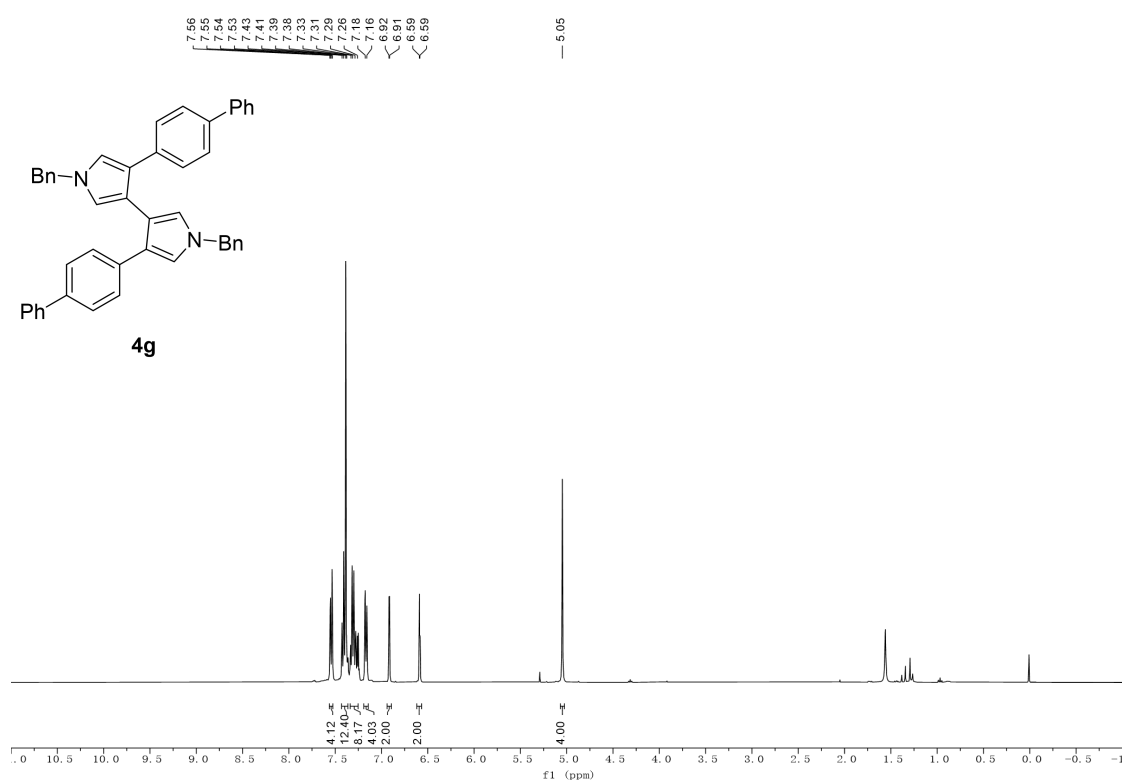

Chemical structure of **4g** is shown. The <sup>1</sup>H NMR spectrum (CDCl<sub>3</sub>) displays peaks corresponding to the structure, with the following chemical shifts (ppm) listed:

141.29, 138.05, 137.59, 136.41, 135.55, 135.35, 128.61, 128.64, 127.61, 126.95, 126.78, 126.72, 126.68, 124.29, 122.09, 119.35, 116.44, 53.44, 1.42.

Cc1ccc(cc1)-c2cc(ccc2Nc3ccc(C)cc3)-c4ccccc4

**4h**

Chemical shift (ppm): 7.33, 7.31, 7.28, 7.26, 7.25, 7.14, 7.12, 7.06, 7.04, 7.02, 6.98, 6.88, 6.82, 6.53, 5.01, 2.22.

Integration values: 6.24, 8.02, 2.01, 4.03, 2.00, 4.00, 6.02.

**$^{13}\text{C}\{^1\text{H}\}$  NMR (101 MHz,  $\text{CDCl}_3$ ) spectra of compound 4h:**

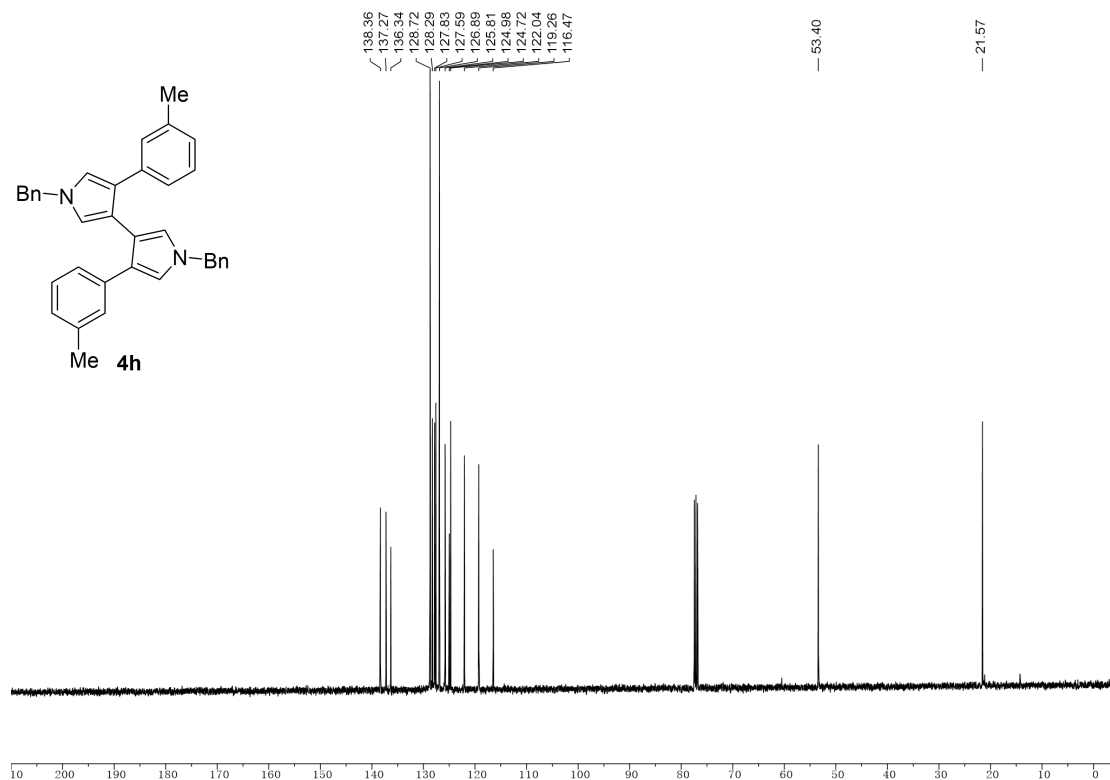

**$^1\text{H}$  NMR (400 MHz,  $\text{CDCl}_3$ ) spectra of compound 4i:**

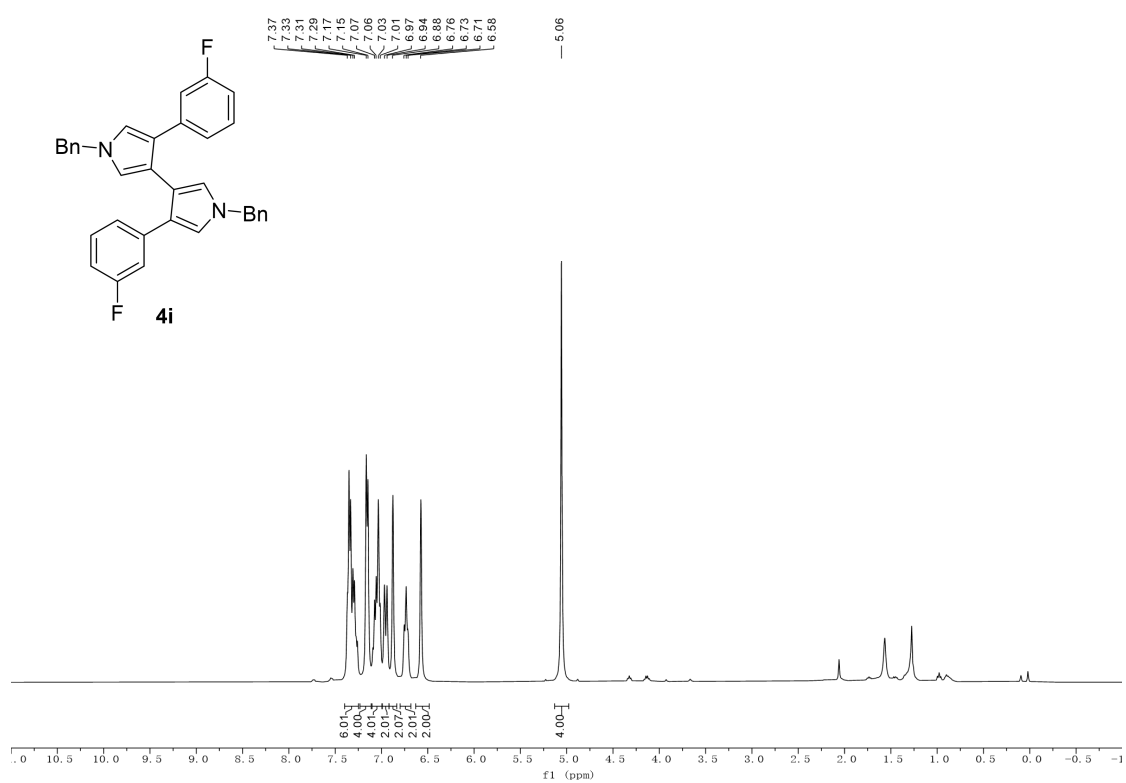

**$^{19}\text{F}\{^1\text{H}\}$  NMR (376 MHz,  $\text{CDCl}_3$ ) spectrum of compound 4i**

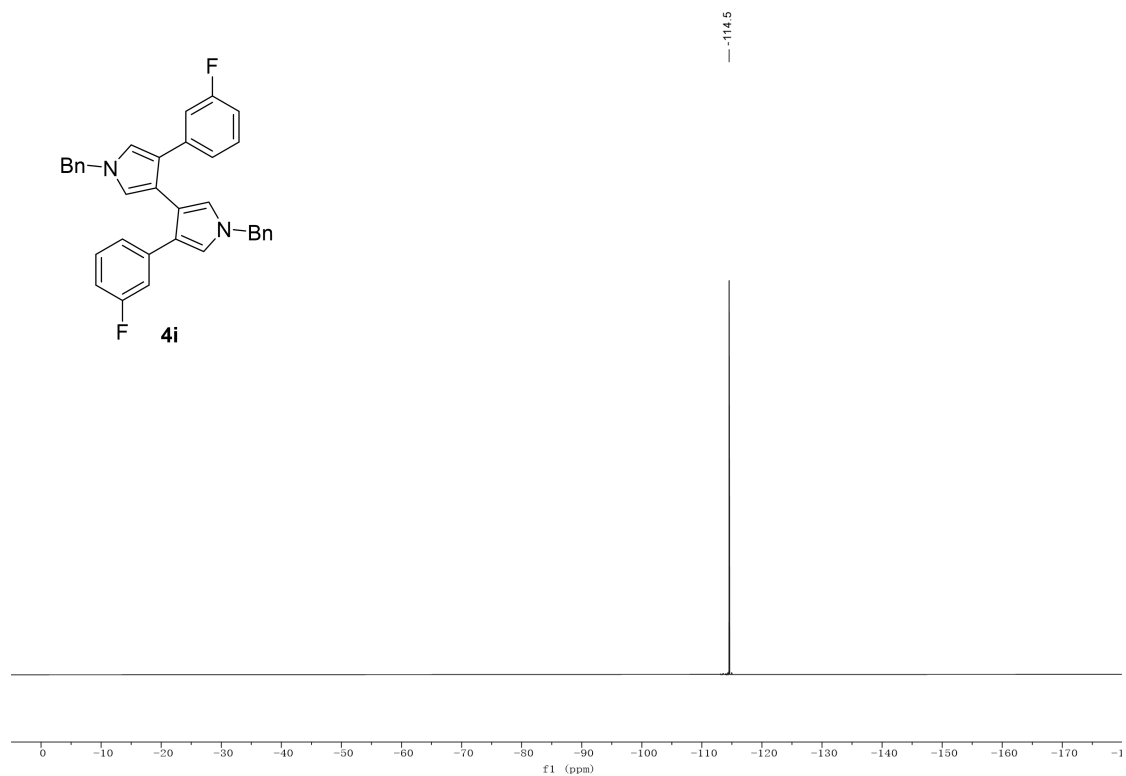

**$^{13}\text{C}\{^1\text{H}\}$  NMR (101 MHz,  $\text{CDCl}_3$ ) spectra of compound 4i:**

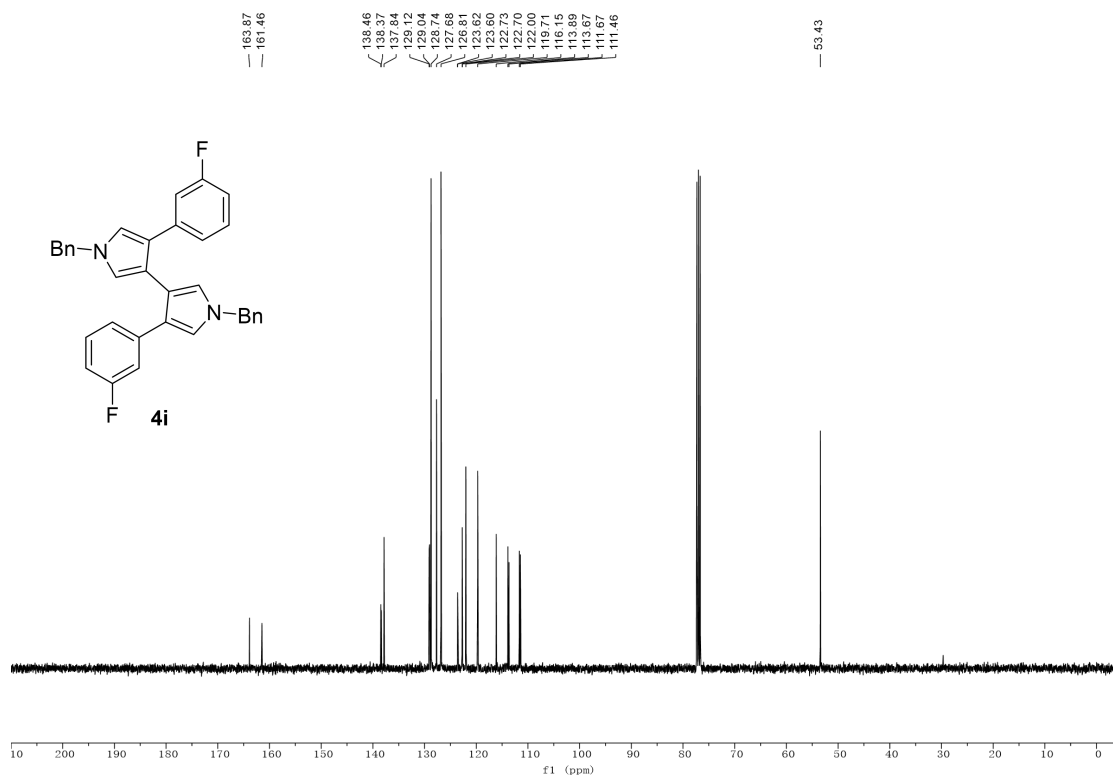

**$^1\text{H}$  NMR (400 MHz,  $\text{CDCl}_3$ ) spectra of compound 4j:**

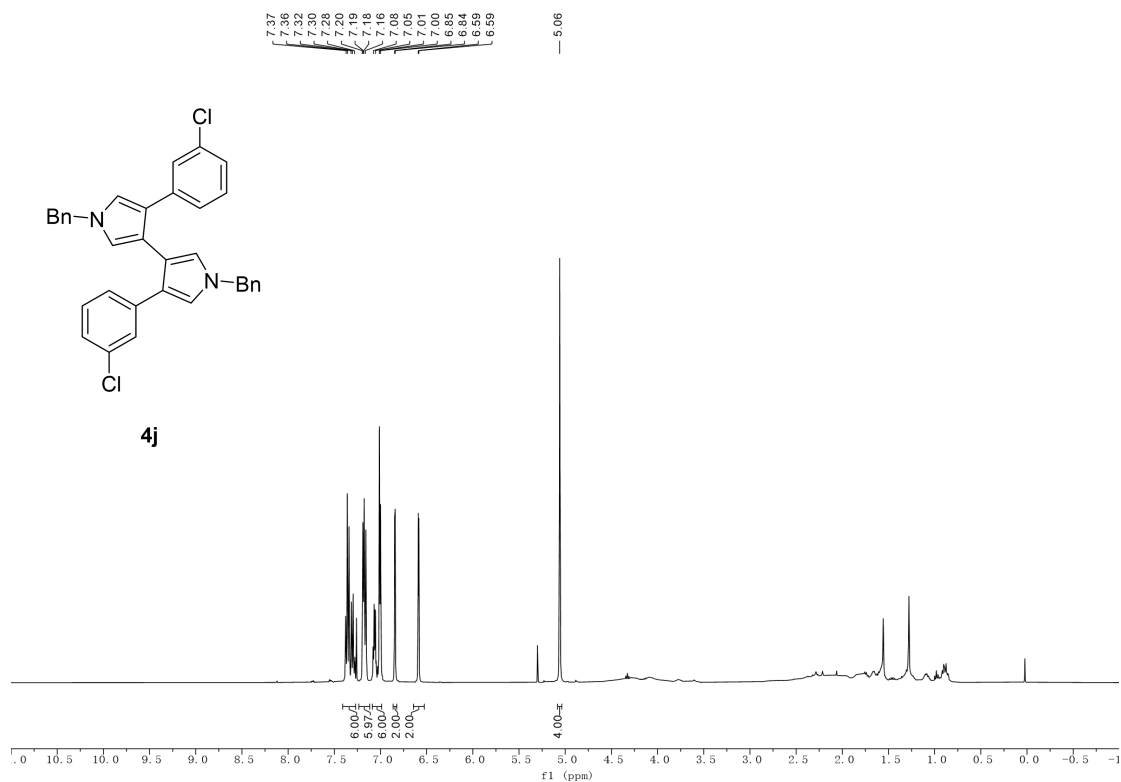

**$^{13}\text{C}\{^1\text{H}\}$  NMR (101 MHz,  $\text{CDCl}_3$ ) spectra of compound 4j:**

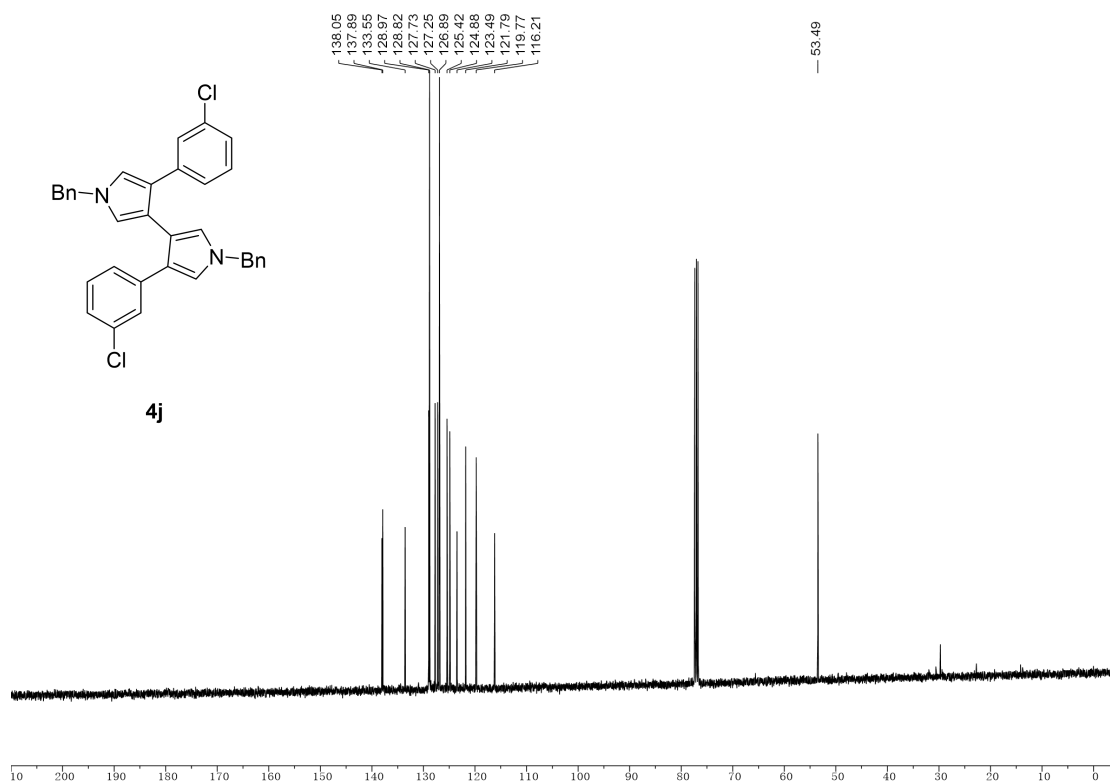

**$^1\text{H}$  NMR (400 MHz,  $\text{CDCl}_3$ ) spectra of compound 4k:**

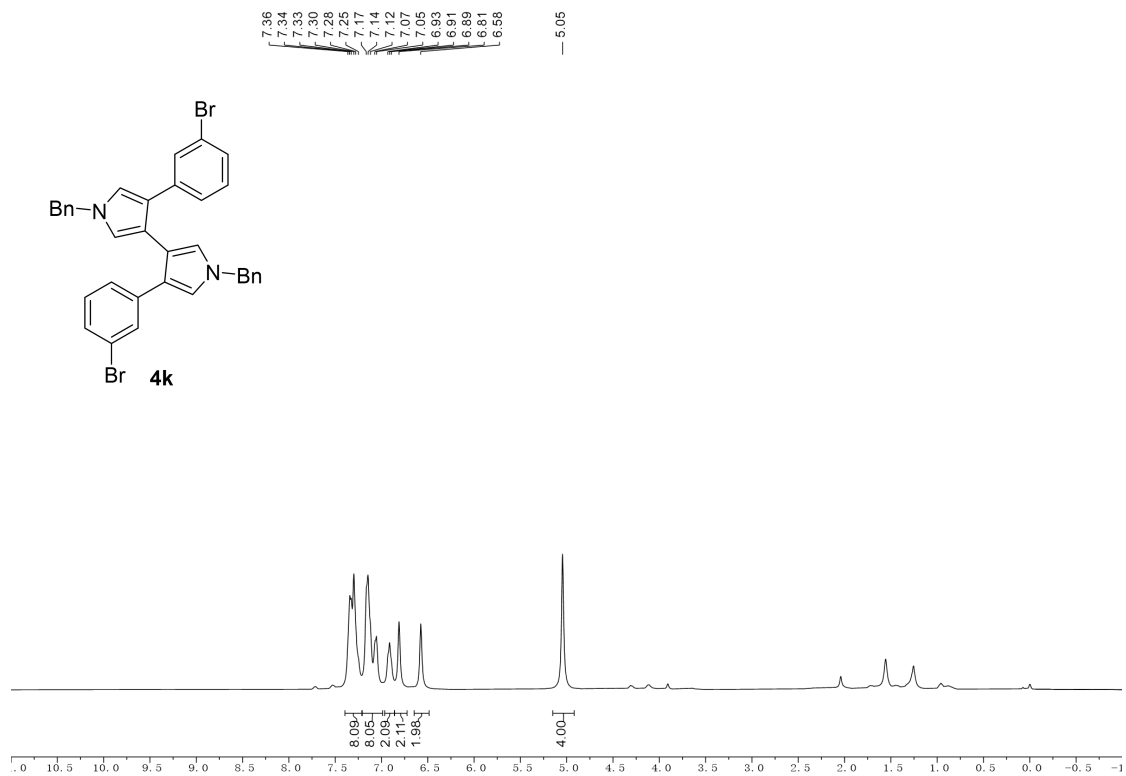

**$^{13}\text{C}\{^1\text{H}\}$  NMR (101 MHz,  $\text{CDCl}_3$ ) spectra of compound 4k:**

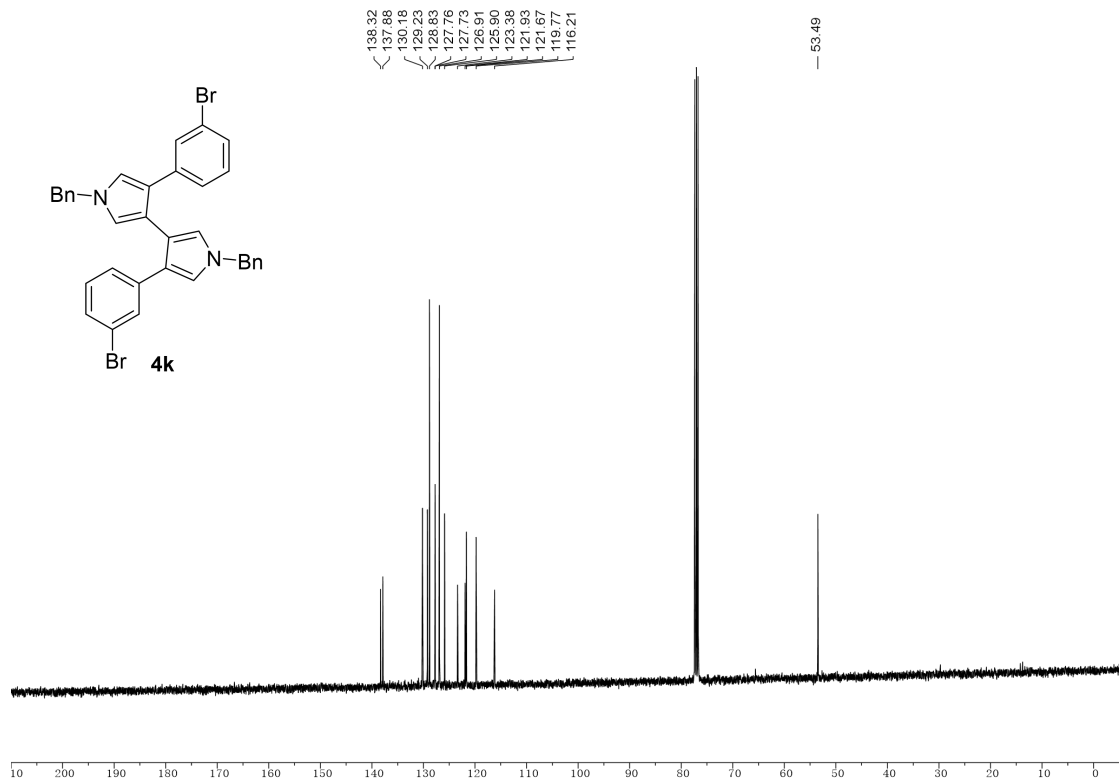



**$^1\text{H}$  NMR (400 MHz,  $\text{CDCl}_3$ ) spectra of compound 4l:**

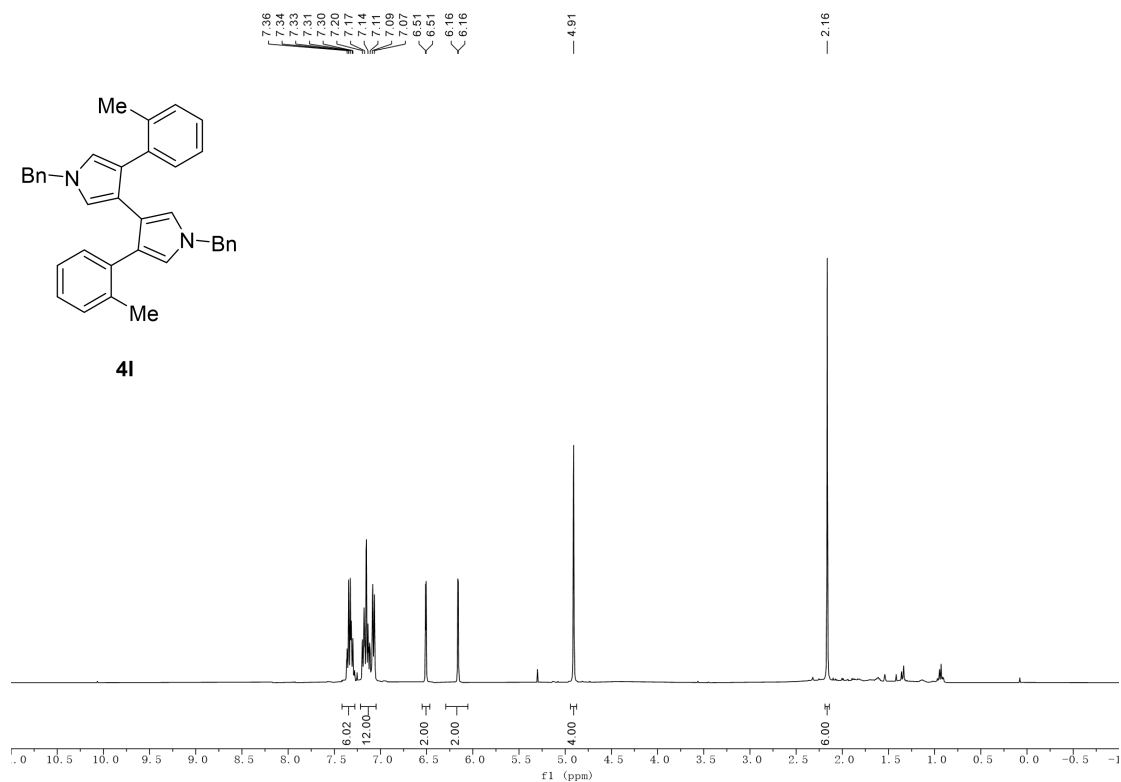

**$^{13}\text{C}\{^1\text{H}\}$  NMR (101 MHz,  $\text{CDCl}_3$ ) spectra of compound 4l:**

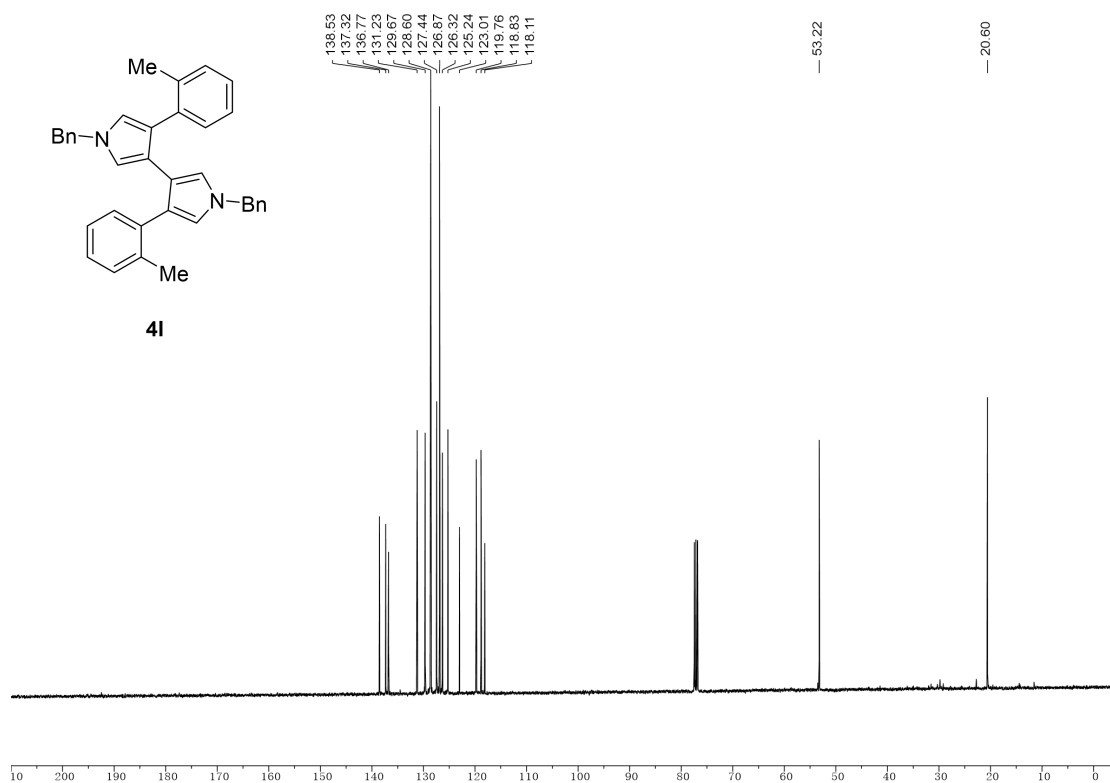

**$^1\text{H}$  NMR (400 MHz,  $\text{CDCl}_3$ ) spectra of compound 4m:**

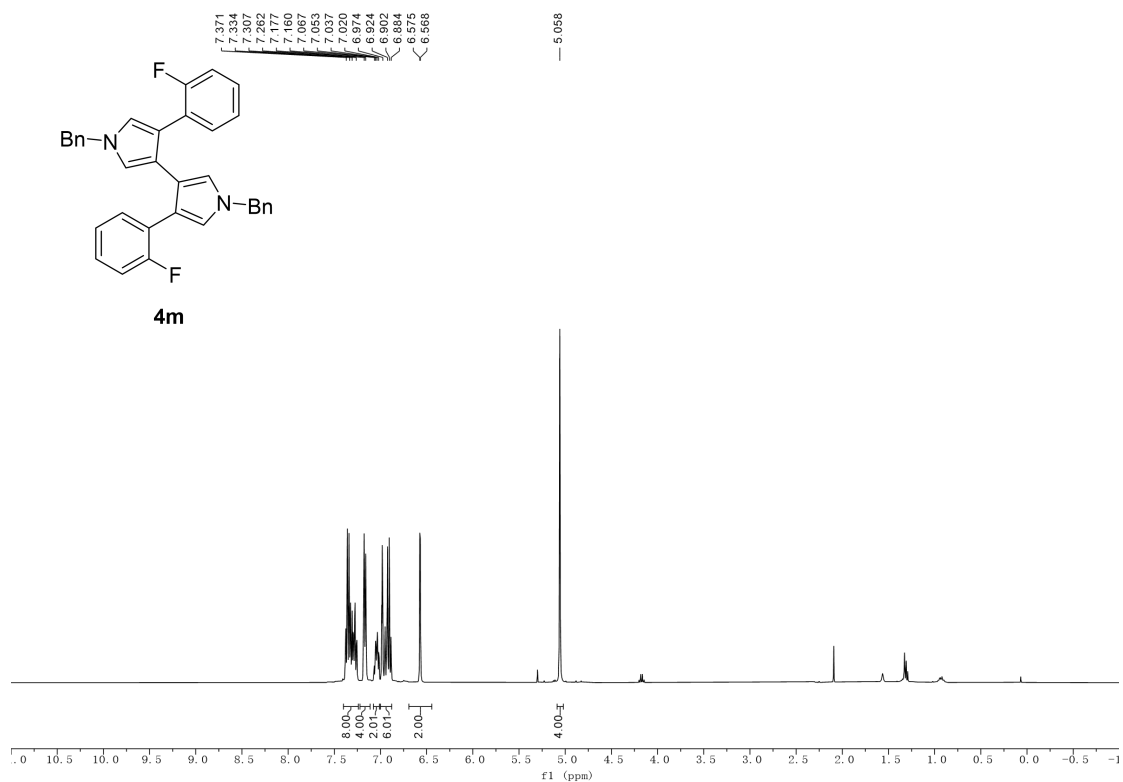

**$^{19}\text{F}\{^1\text{H}\}$  NMR (376 MHz,  $\text{CDCl}_3$ ) spectrum of compound 4m**

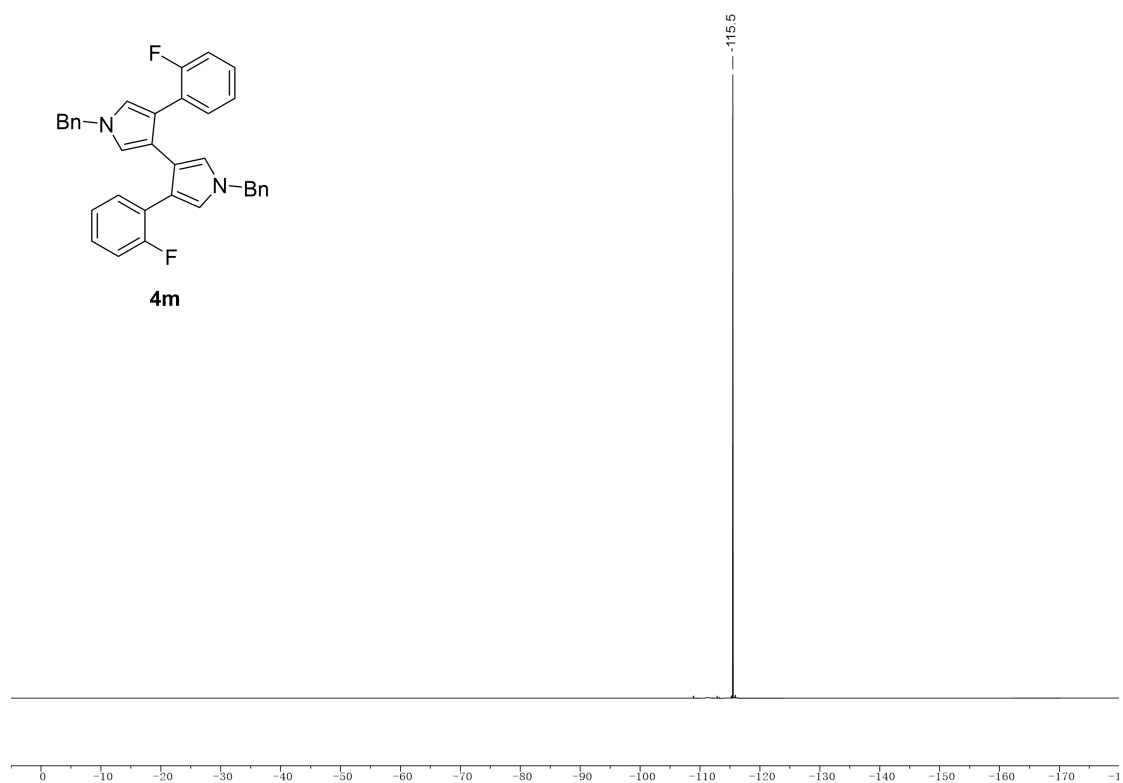

**$^{13}\text{C}\{^1\text{H}\}$  NMR (101 MHz,  $\text{CDCl}_3$ ) spectra of compound 4m:**

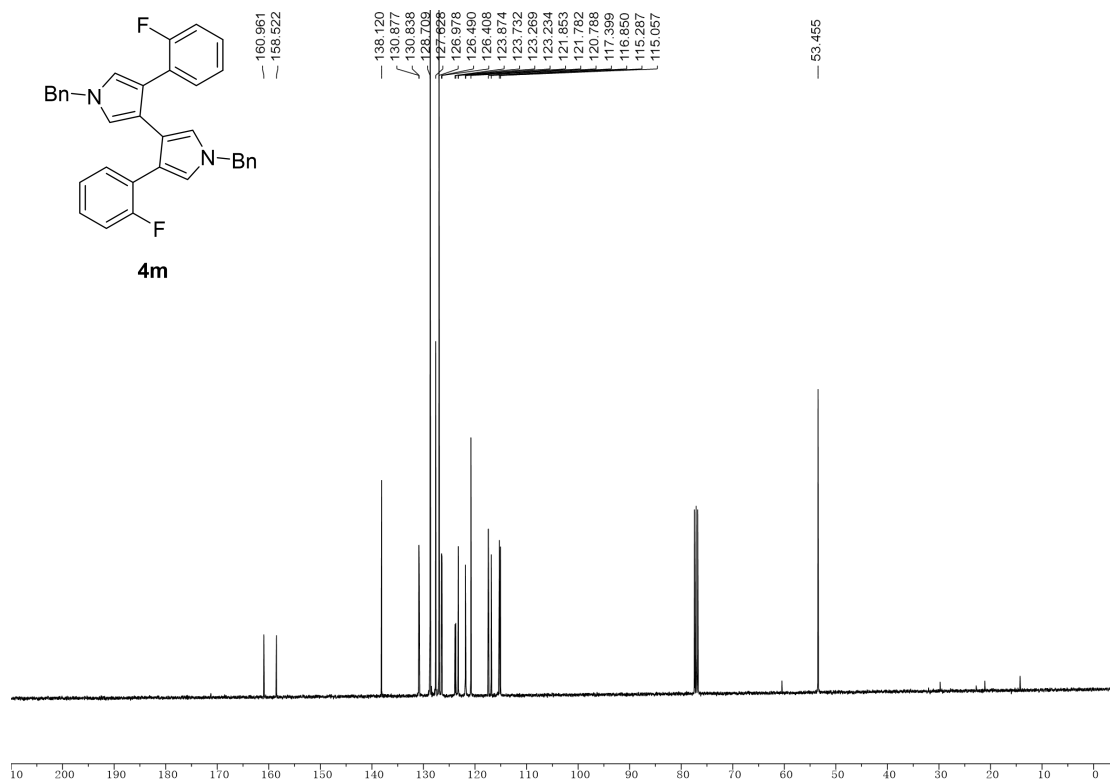

**$^1\text{H}$  NMR (400 MHz,  $\text{CDCl}_3$ ) spectra of compound 4n:**

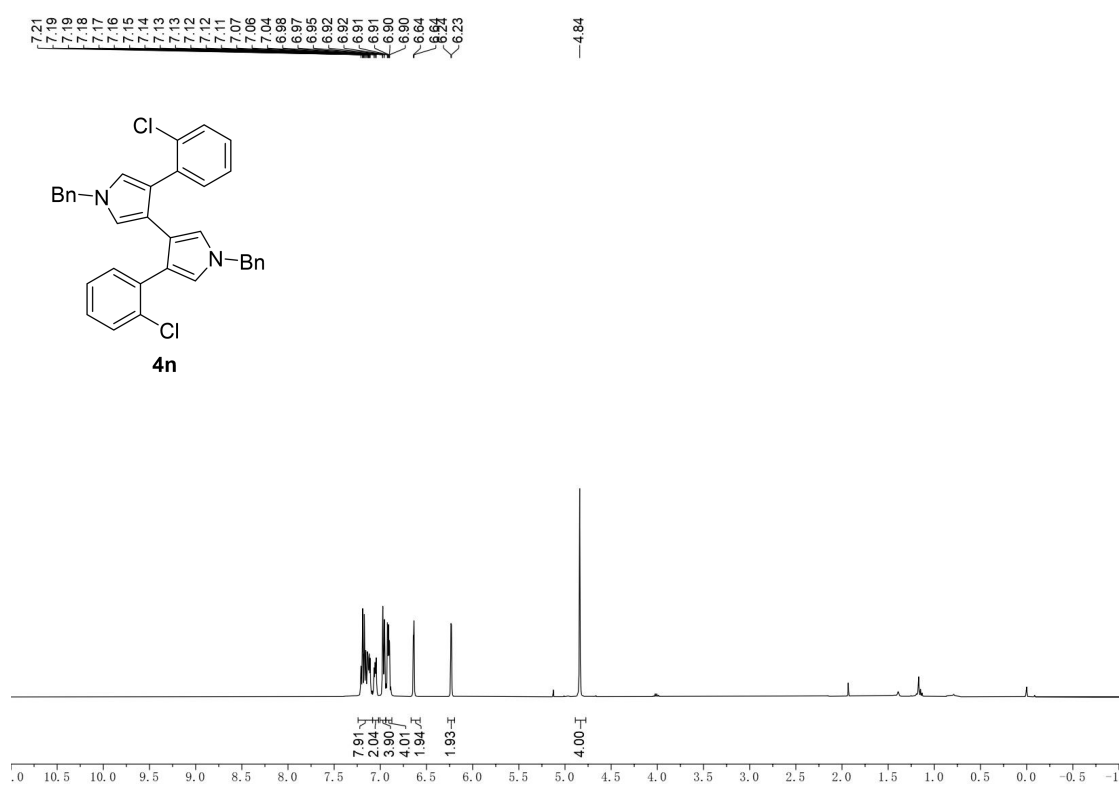

**$^{13}\text{C}\{^1\text{H}\}$  NMR (101 MHz,  $\text{CDCl}_3$ ) spectra of compound 4n:**

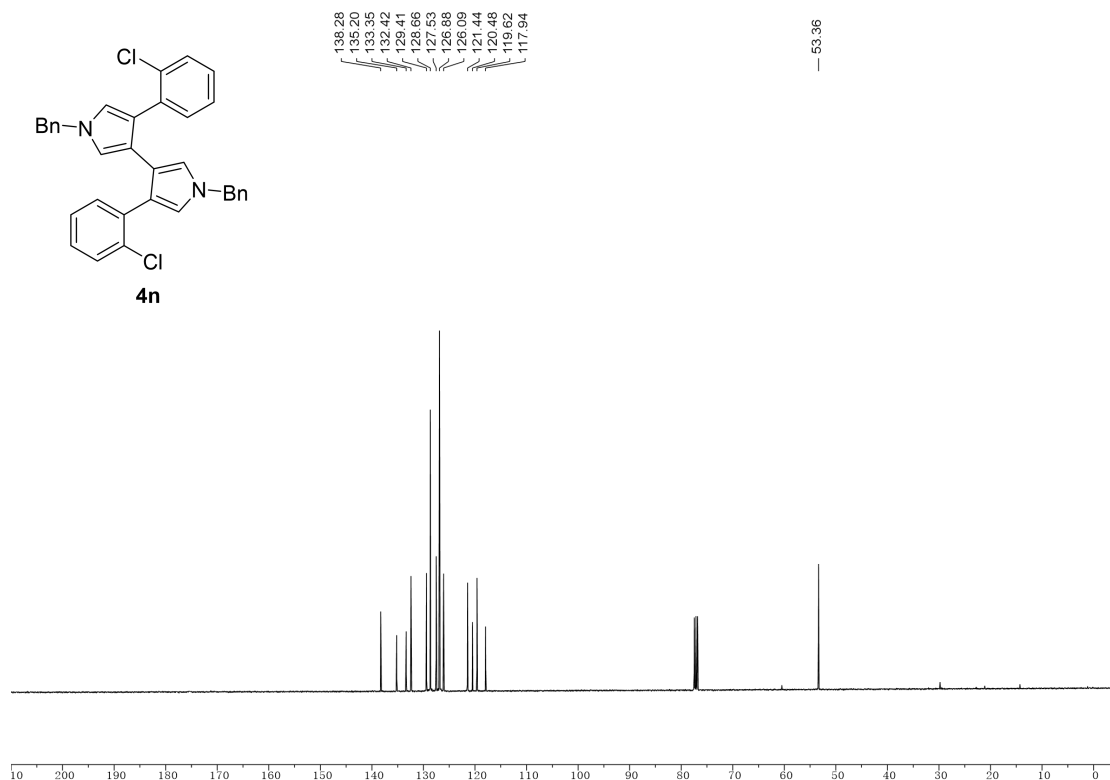

**$^1\text{H}$  NMR (400 MHz,  $\text{CDCl}_3$ ) spectra of compound 4o:**

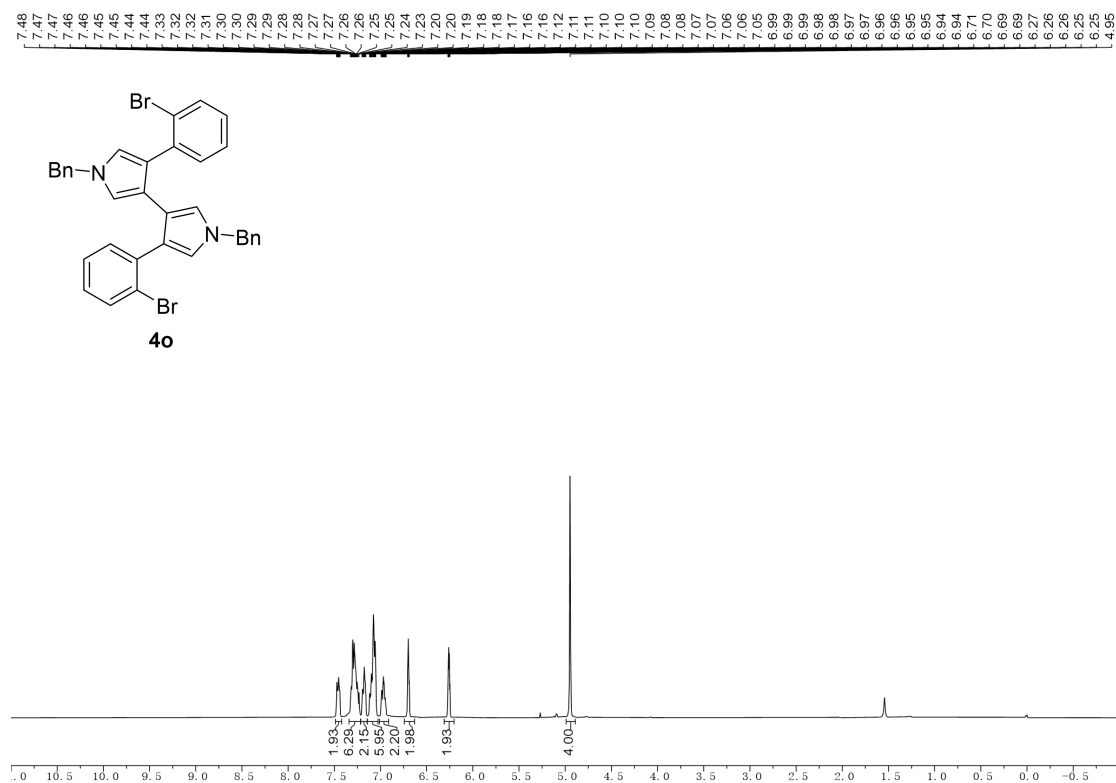

**$^{13}\text{C}\{^1\text{H}\}$  NMR (101 MHz,  $\text{CDCl}_3$ ) spectra of compound 4o:**

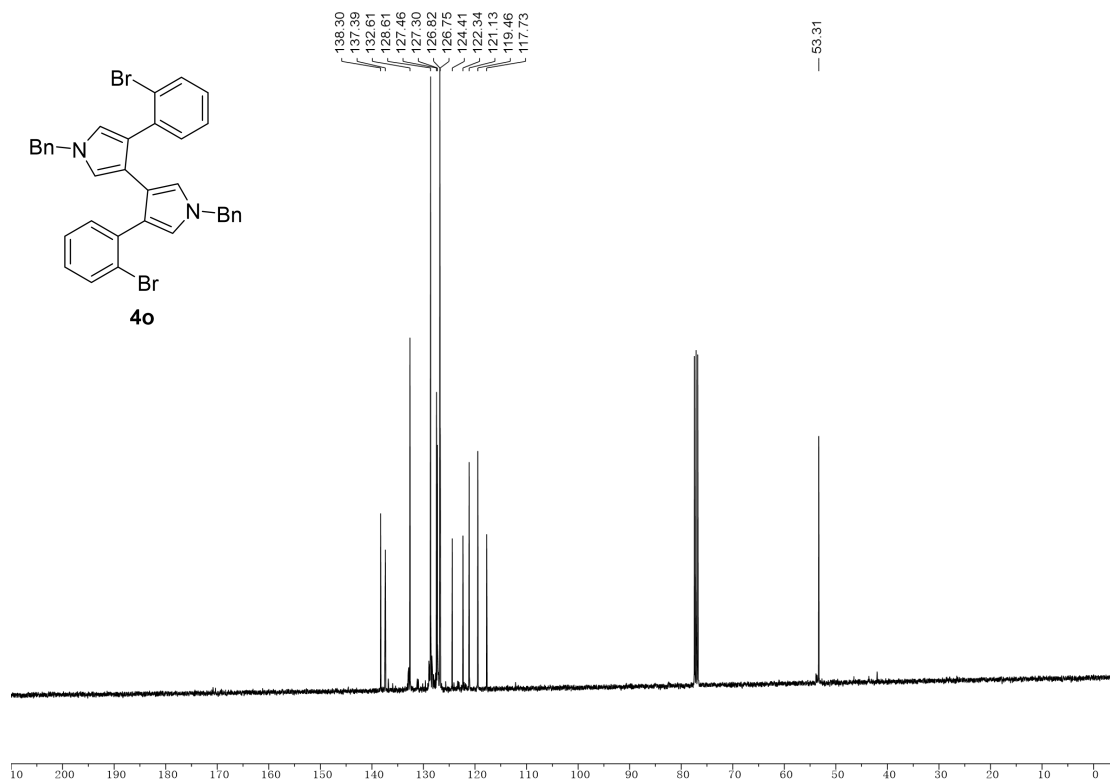

**$^1\text{H}$  NMR (400 MHz,  $\text{CDCl}_3$ ) spectra of compound 4p:**

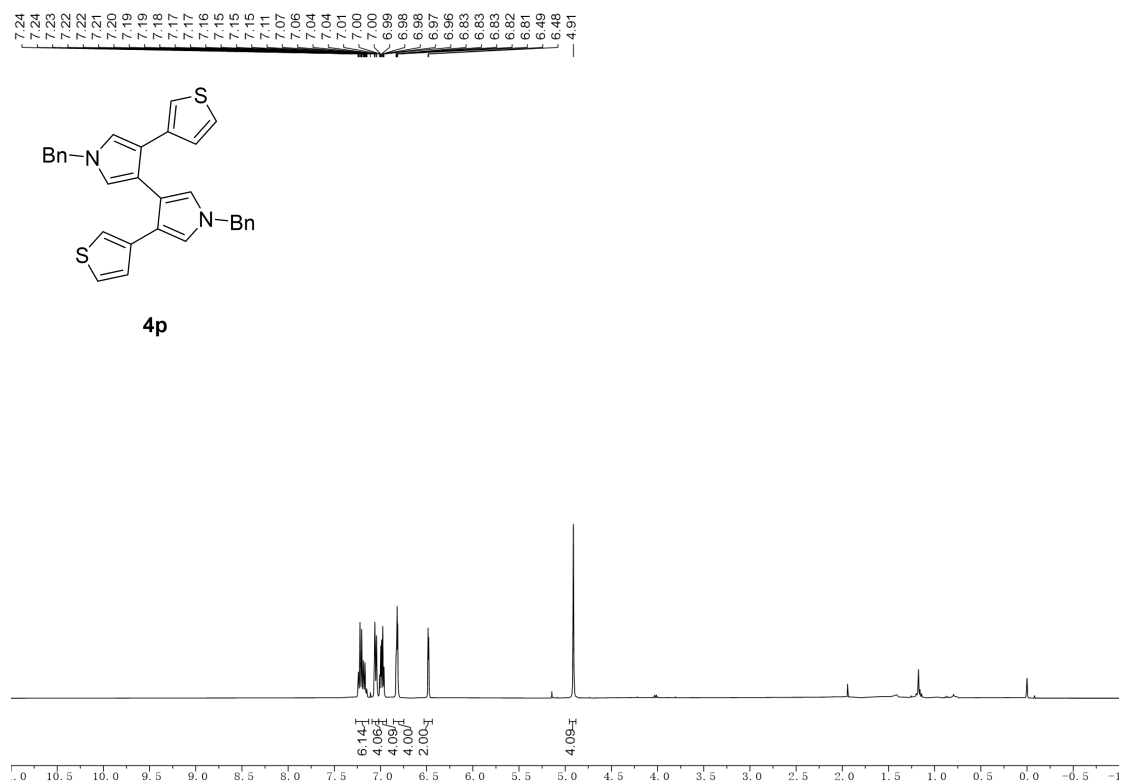

**$^{13}\text{C}\{^1\text{H}\}$  NMR (101 MHz,  $\text{CDCl}_3$ ) spectra of compound 4p:**

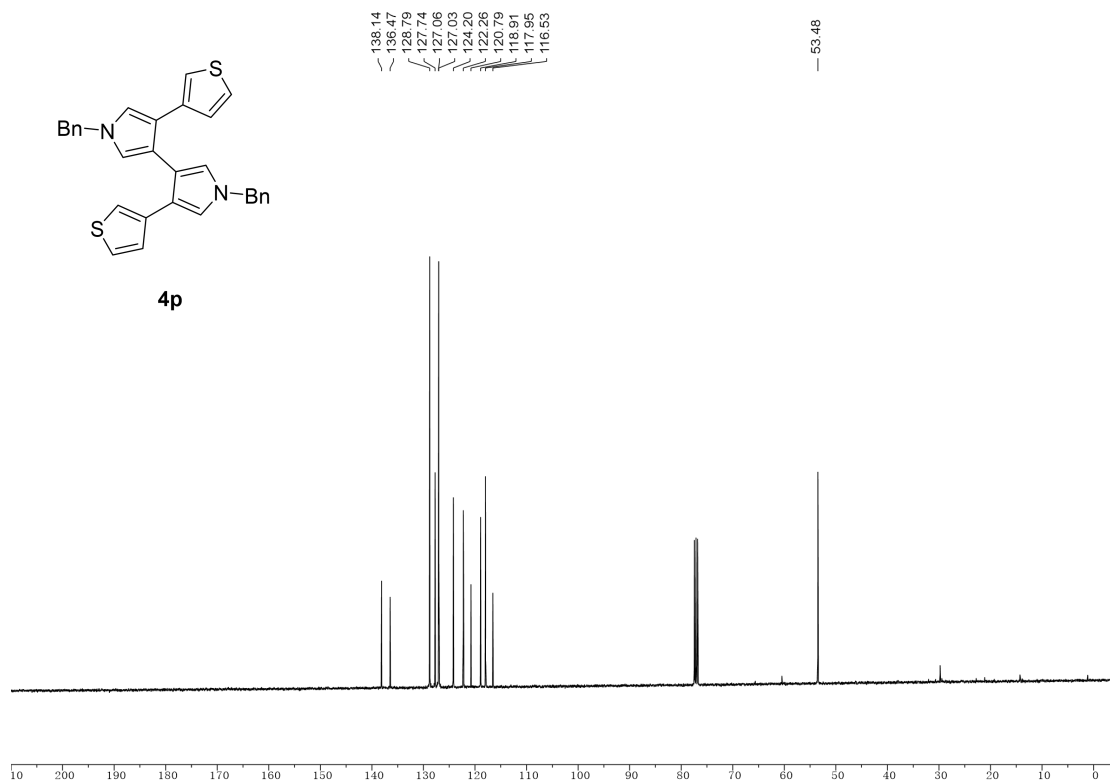

**$^1\text{H}$  NMR (400 MHz,  $\text{CDCl}_3$ ) spectra of compound 4q:**

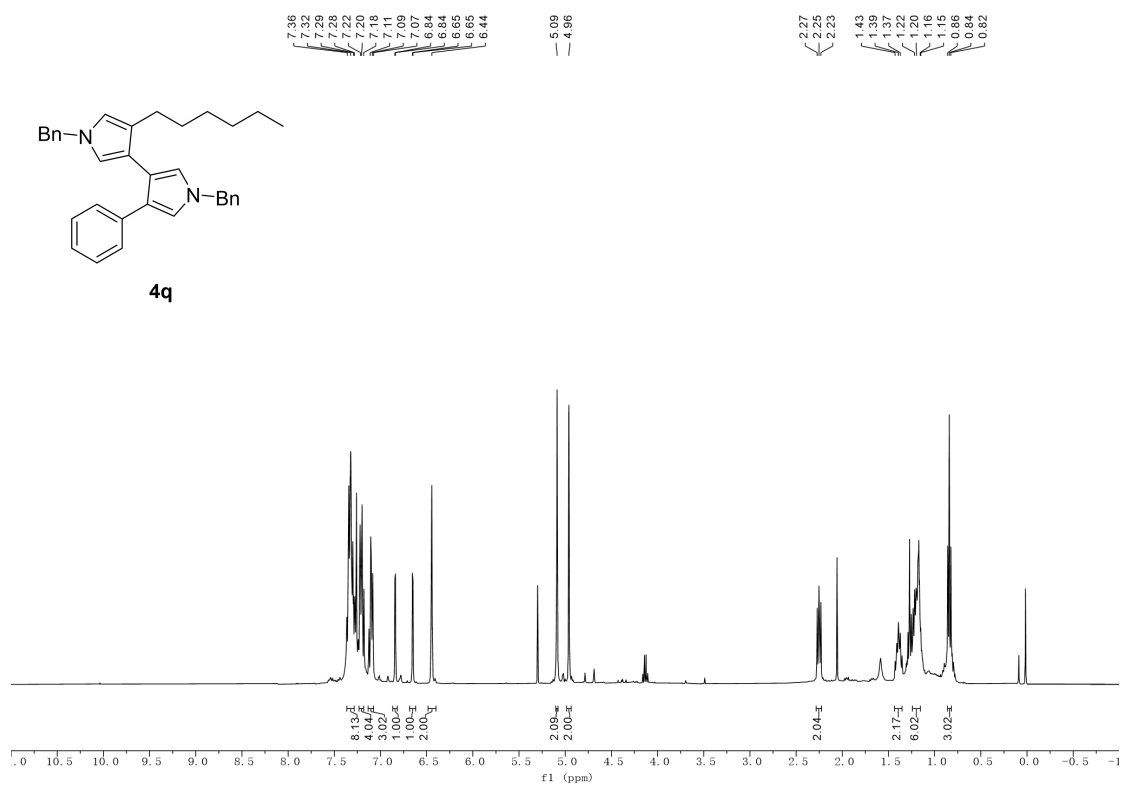

**$^{13}\text{C}\{^1\text{H}\}$  NMR (101 MHz,  $\text{CDCl}_3$ ) spectra of compound 4q:**

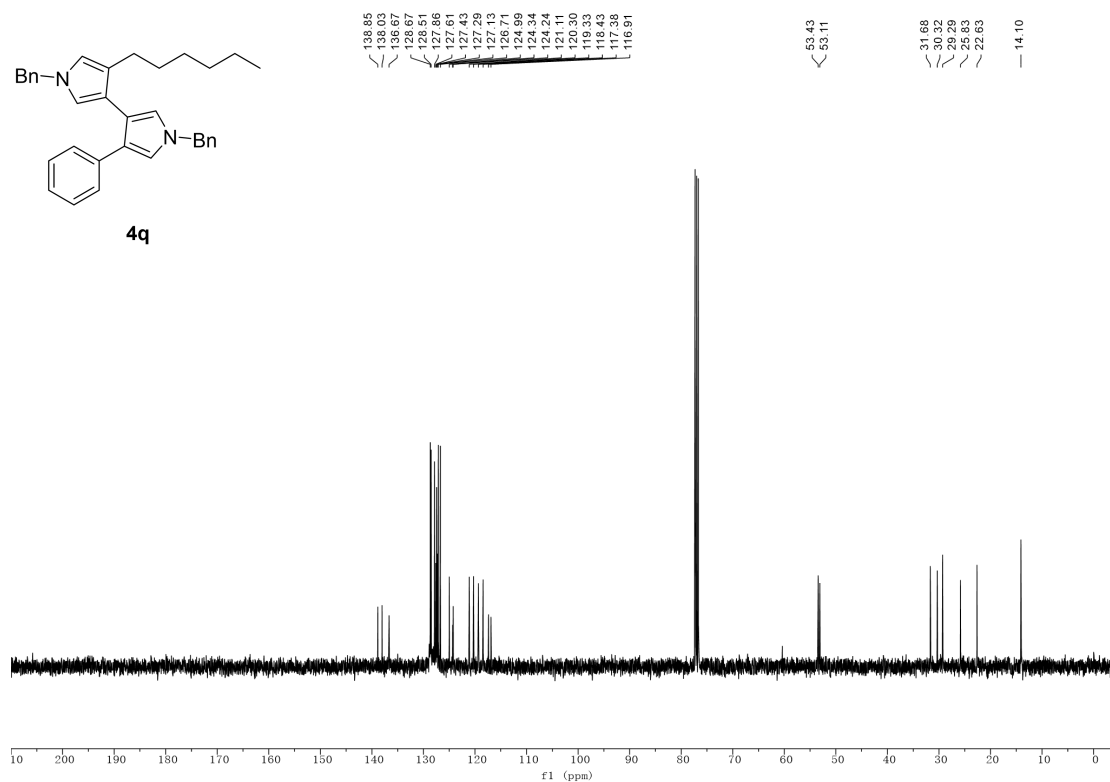

**$^1\text{H}$  NMR (400 MHz,  $\text{CDCl}_3$ ) spectra of compound 4r:**

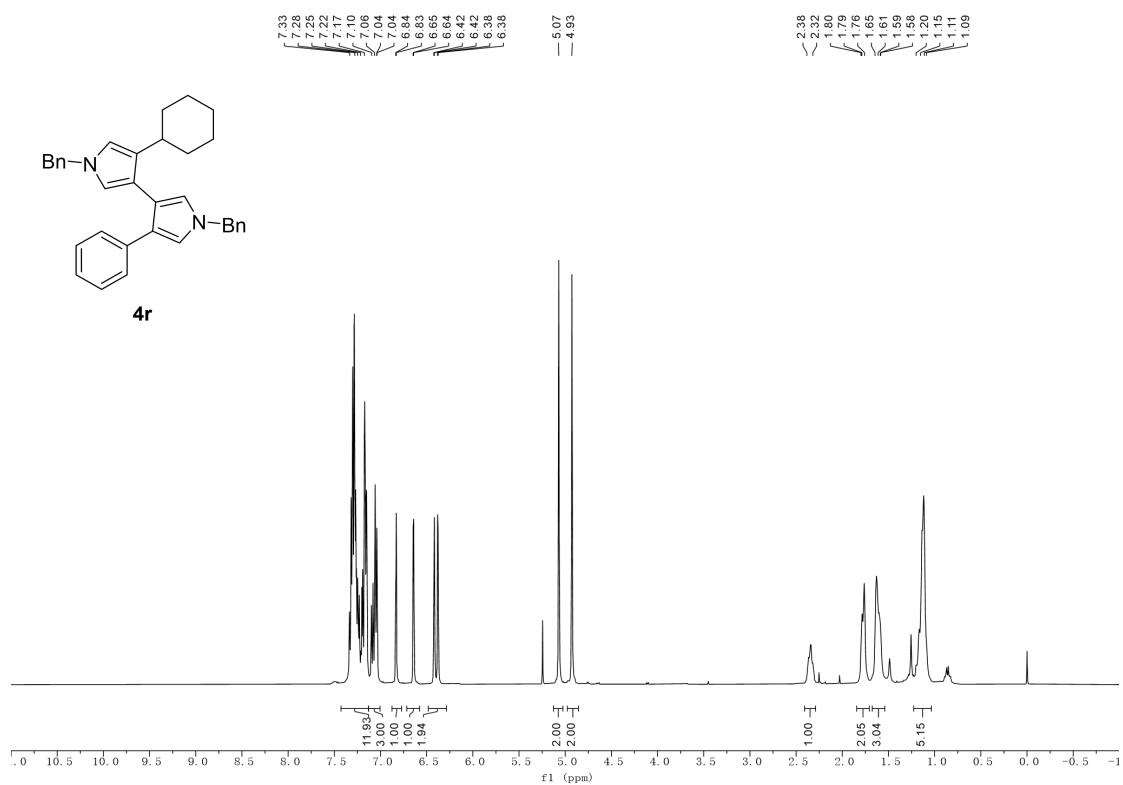

**$^{13}\text{C}\{^1\text{H}\}$  NMR (101 MHz,  $\text{CDCl}_3$ ) spectra of compound 4r:**

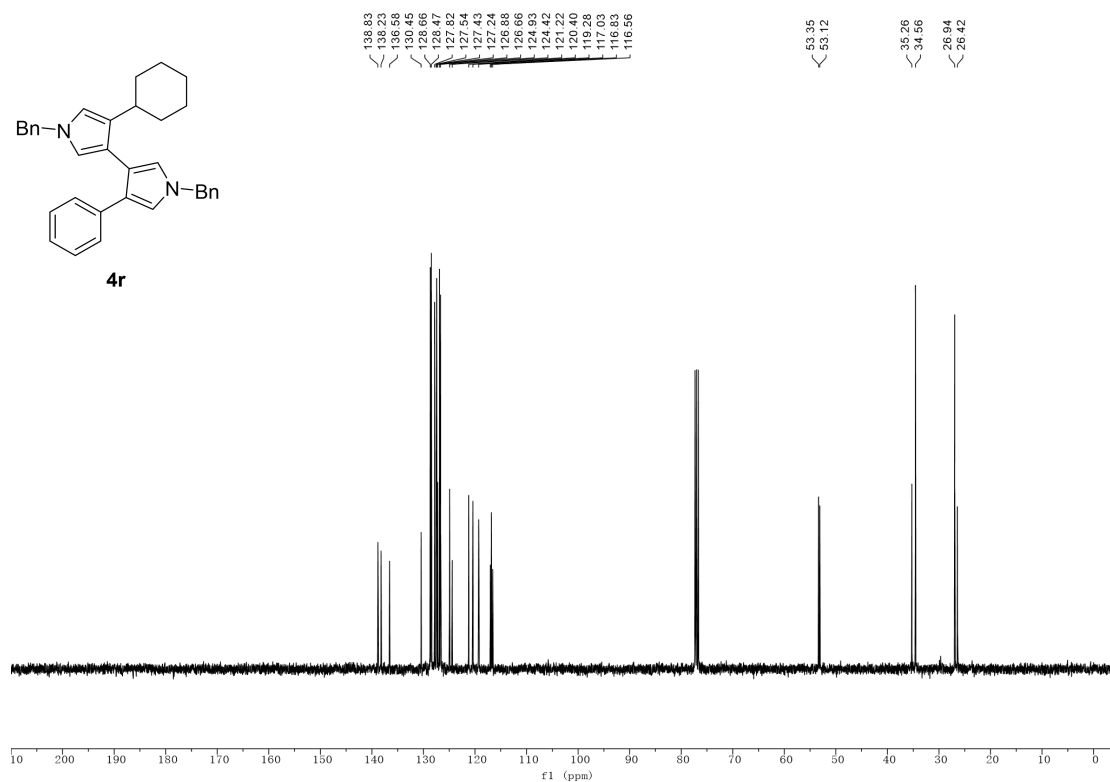

**$^1\text{H}$  NMR (300 MHz,  $\text{CDCl}_3$ ) spectra of compound 4s:**

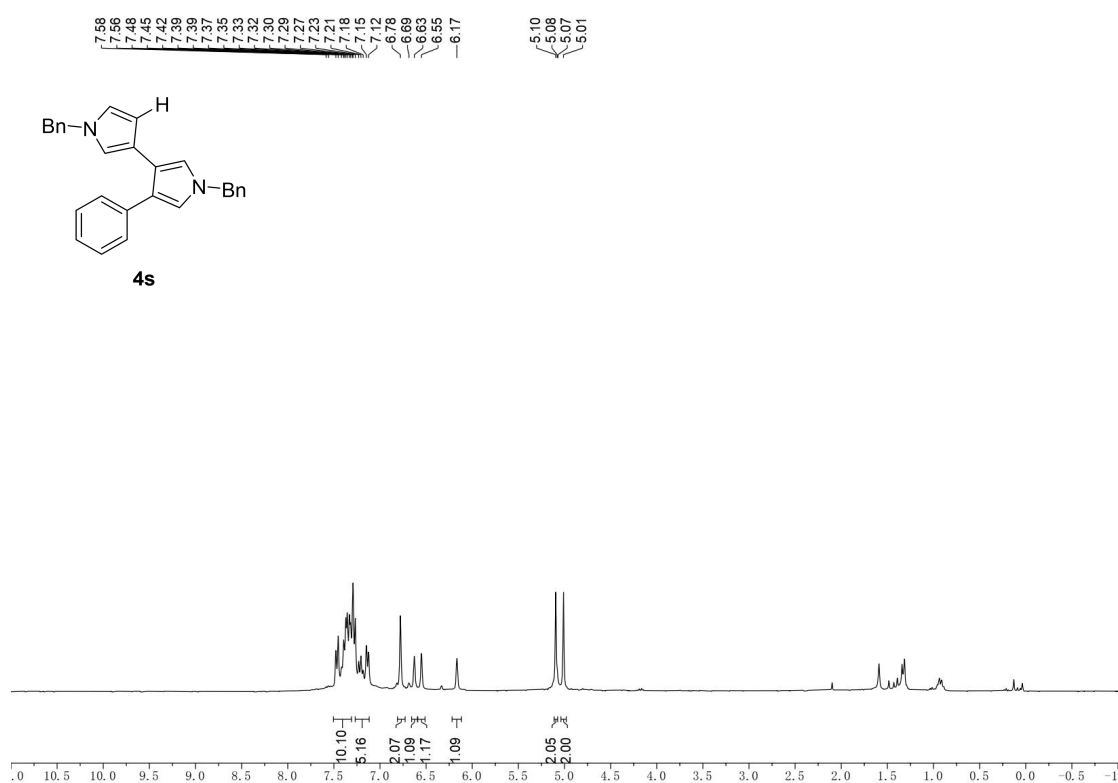



**$^{13}\text{C}\{^1\text{H}\}$  NMR (75 MHz,  $\text{CDCl}_3$ ) spectra of compound 4s:**

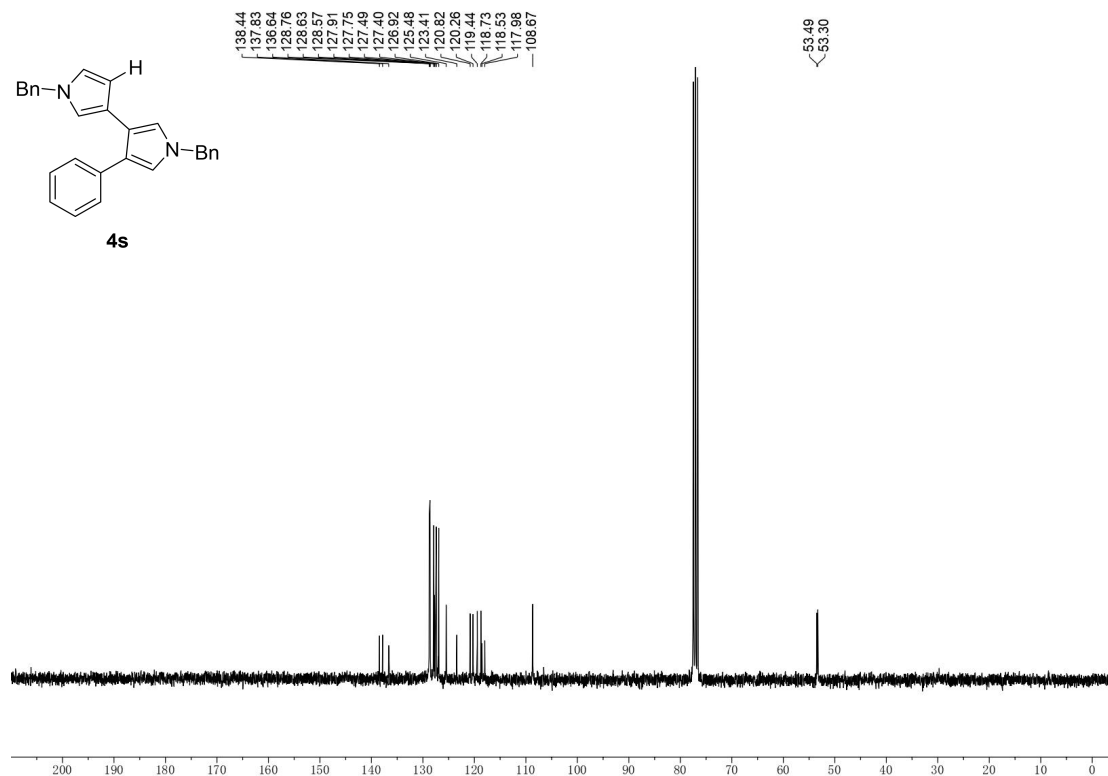

**$^1\text{H}$  NMR (300 MHz,  $\text{CDCl}_3$ ) spectra of compound 4t:**

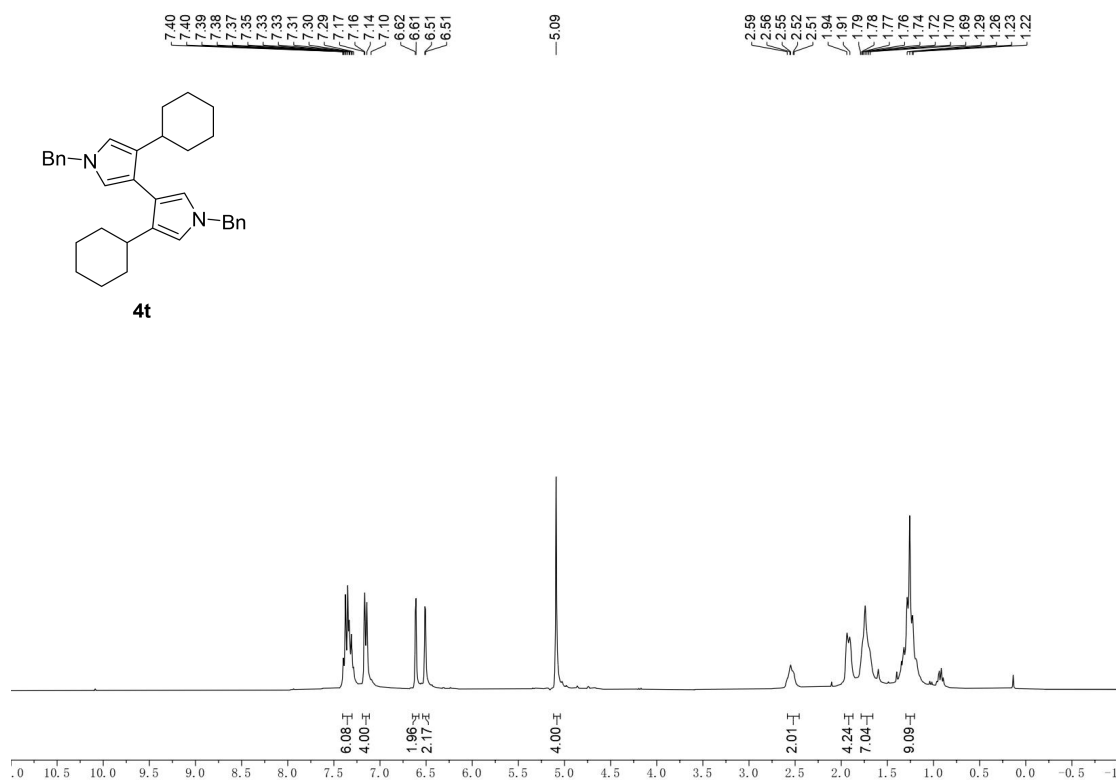

**$^{13}\text{C}\{^1\text{H}\}$  NMR (75 MHz,  $\text{CDCl}_3$ ) spectra of compound 4t:**

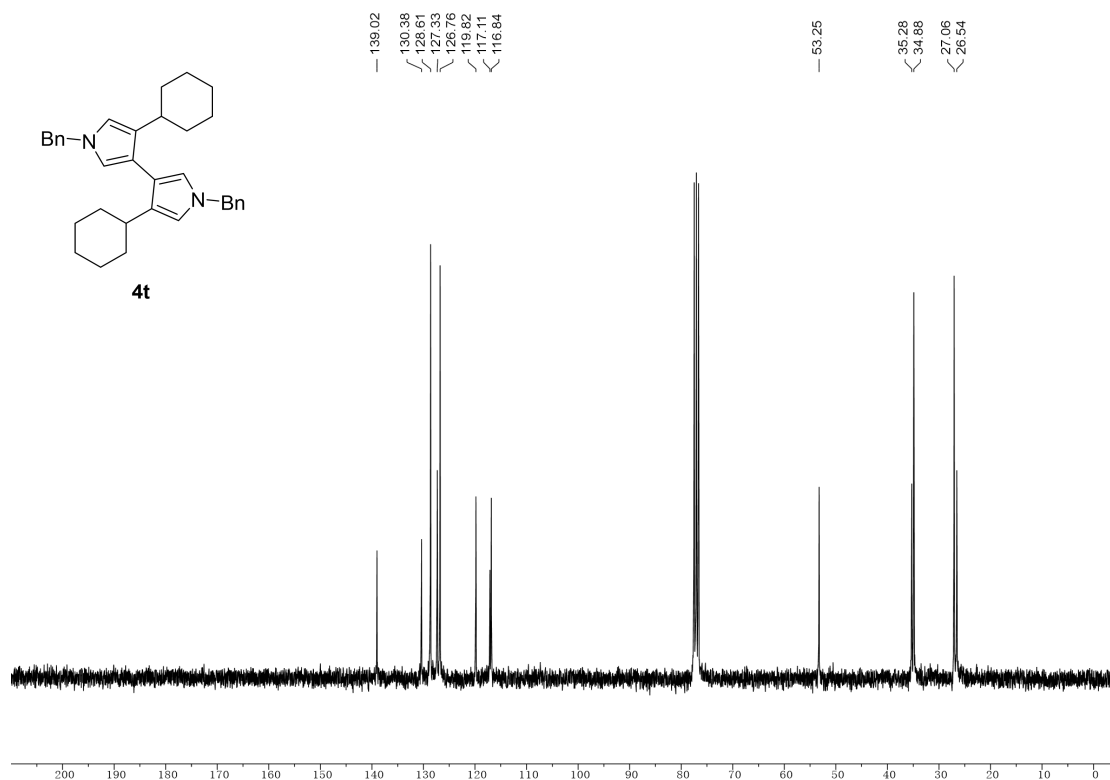

**16. NMR spectra copies of the compounds 5, 6a, 6b, 7, 8, 9, 10, 11.**

**$^1\text{H}$  NMR (400 MHz,  $\text{CDCl}_3$ ) spectra of compound 5:**

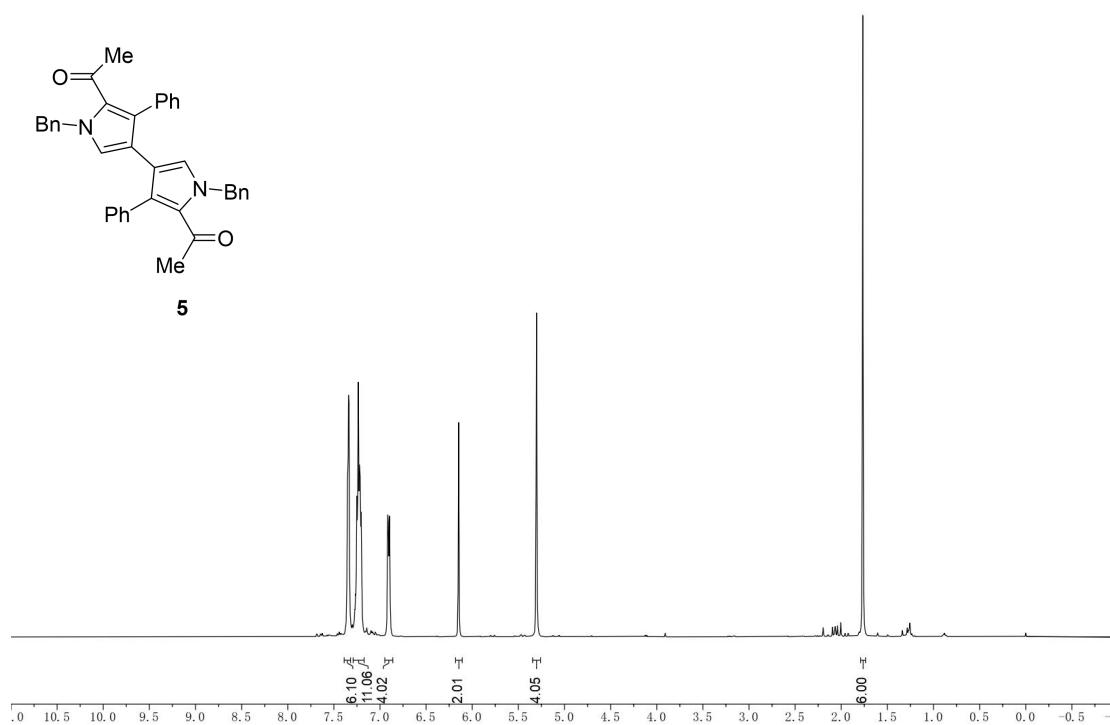

**$^{13}\text{C}\{^1\text{H}\}$  NMR (75 MHz,  $\text{CDCl}_3$ ) spectra of compound 5:**

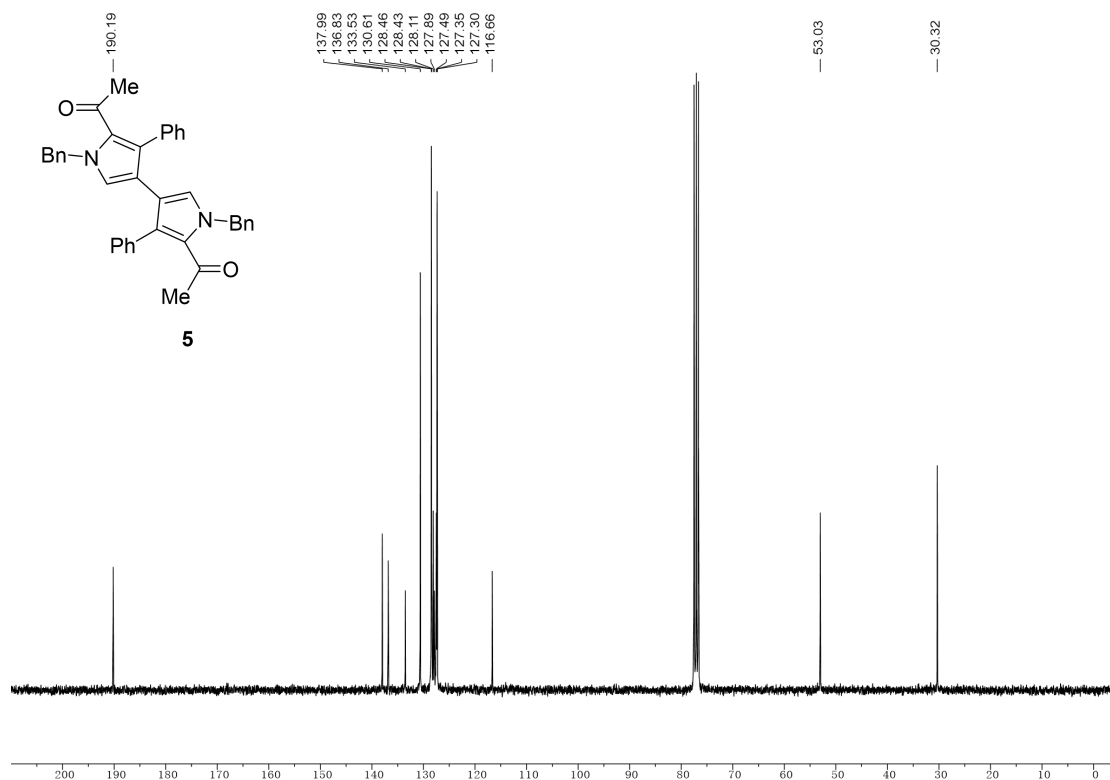

**$^1\text{H}$  NMR (400 MHz,  $\text{CDCl}_3$ ) spectra of compound 6a:**

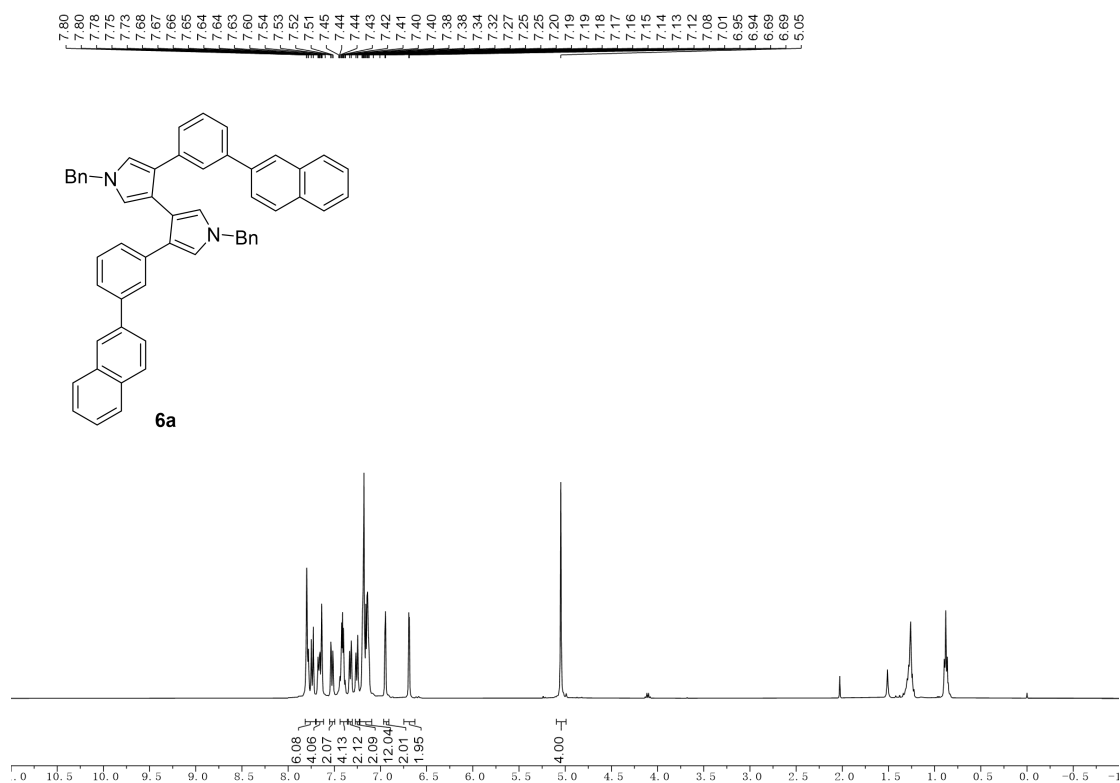

**$^{13}\text{C}\{^1\text{H}\}$  NMR (101 MHz,  $\text{CDCl}_3$ ) spectra of compound 6a:**

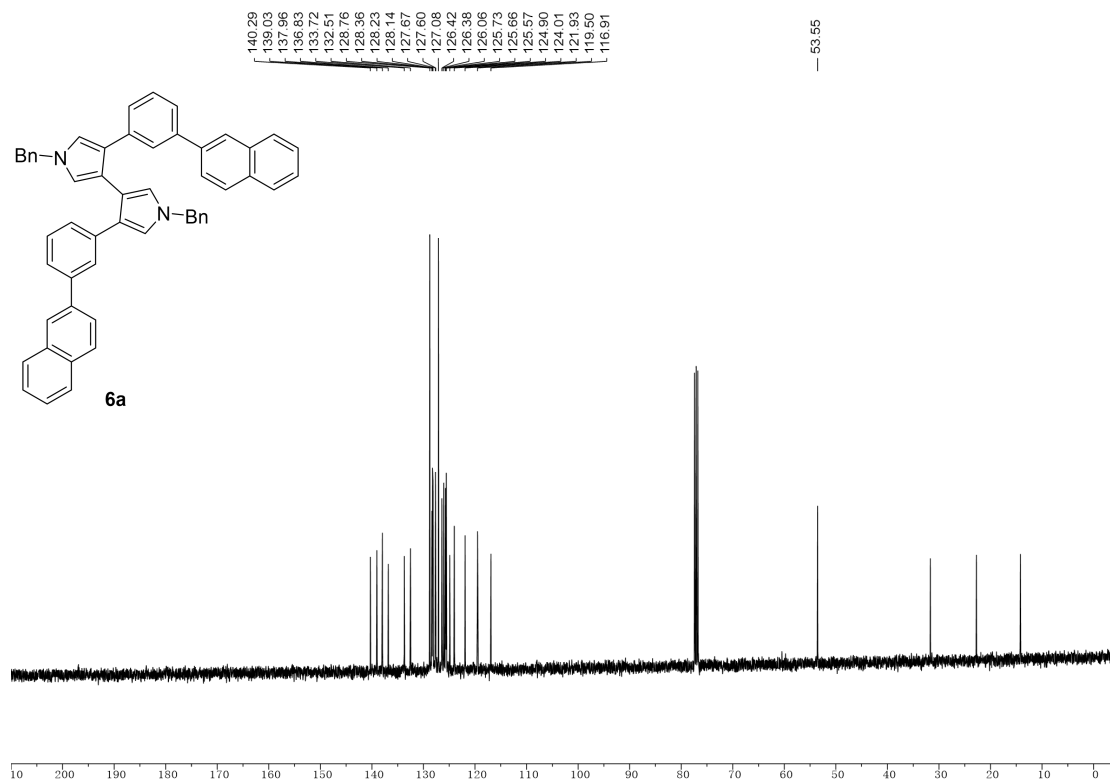

**$^1\text{H}$  NMR (400 MHz,  $\text{CDCl}_3$ ) spectra of compound 6b:**

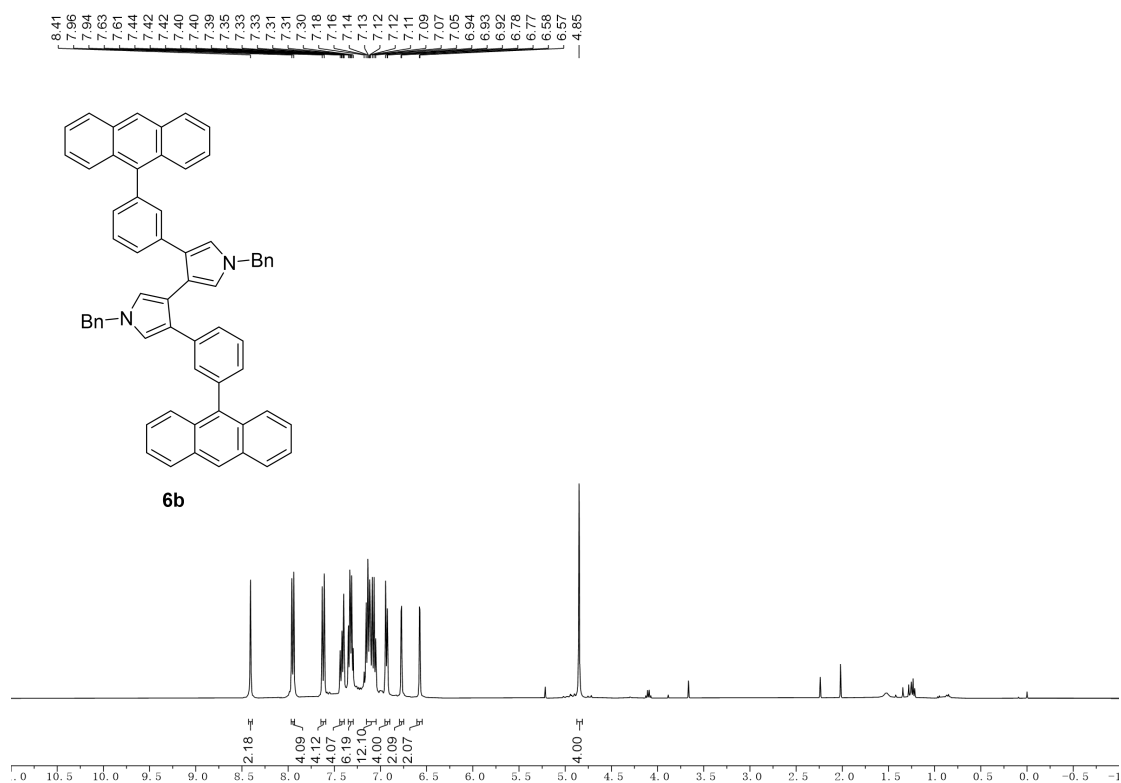

**6b**

<sup>13</sup>C NMR spectrum (CDCl<sub>3</sub>) of compound **6b**. The spectrum shows peaks at the following chemical shifts (ppm): 138.19, 137.86, 137.82, 137.80, 136.46, 136.45, 131.43, 130.28, 129.73, 129.73, 128.66, 128.16, 127.93, 127.86, 127.60, 127.48, 127.06, 126.39, 126.20, 125.11, 125.08, 124.25, 121.69, 119.95, 116.85, 75.42, 53.42.

Chemical structure of compound **7** is shown above the  $^1\text{H}$  NMR spectrum. The spectrum was recorded in  $\text{CDCl}_3$  and displays peaks from 0 to 10 ppm. The chemical shifts ( $\delta$ ) are listed at the top, and the integrations are shown below the baseline.

**Chemical Shifts ( $\delta$ , ppm):** 7.54, 7.26, 7.20, 7.17, 7.16, 7.14, 7.13, 6.93, 6.83, 6.82, 6.65, 5.08, 2.90, 2.89, 2.88, 2.56, 2.54, 2.53, 2.37, 2.33, 2.32, 2.19, 2.14, 2.09, 2.07, 1.65, 1.60, 1.54, 1.48, 0.93.

**Integrations:** 2.12, 4.05, 2.12, 2.03, 4.00, 4.11, 2.15, 2.27, 10.16, 12.15, 6.00.

**$^{13}\text{C}\{^1\text{H}\}$  NMR (101 MHz,  $\text{CDCl}_3$ ) spectra of compound 7:**

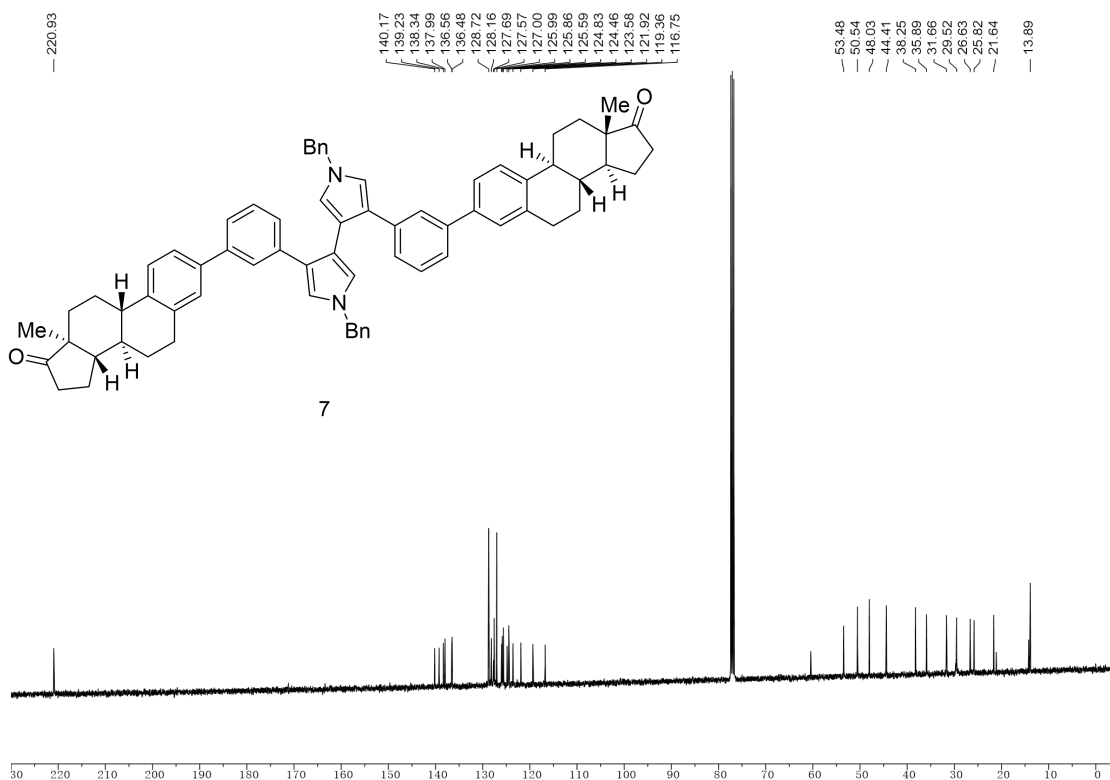

**$^1\text{H}$  NMR (400 MHz,  $\text{CDCl}_3$ ) spectra of compound 8**

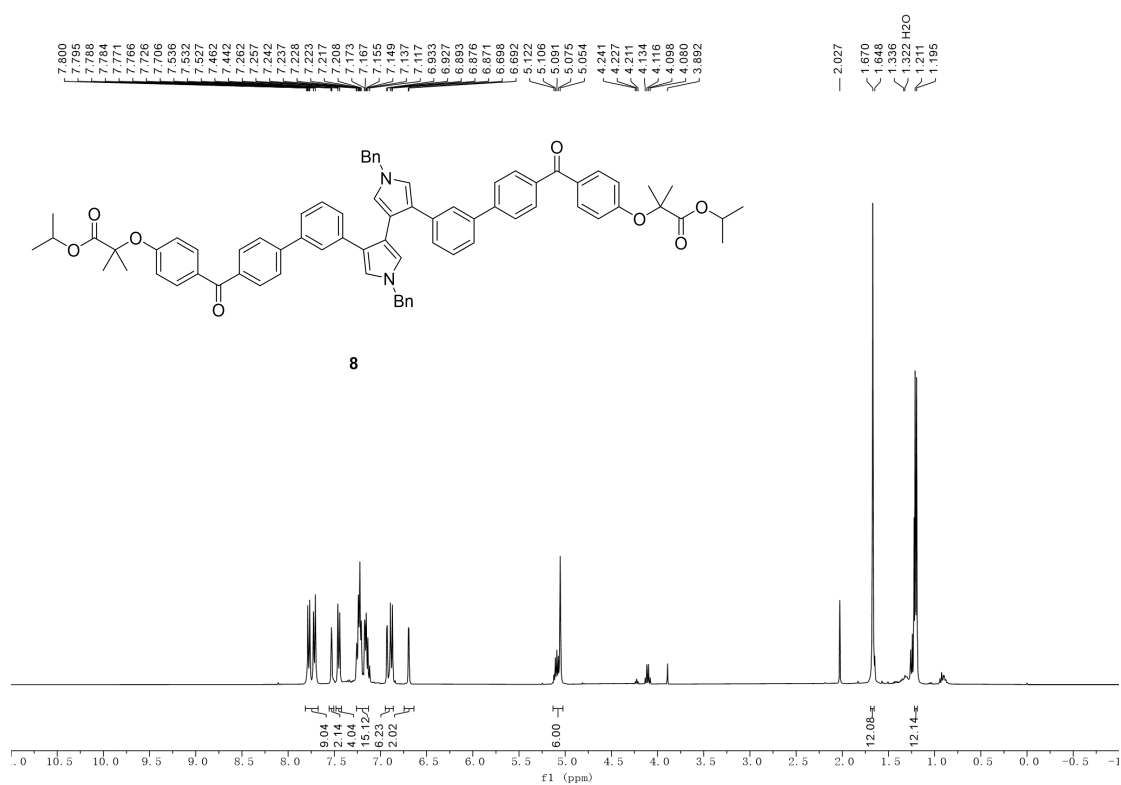

Chemical structure of compound **8** is shown above the <sup>13</sup>C NMR spectrum. The structure is a symmetrical molecule featuring a central benzimidazole core substituted with two benzyl groups and two 4-(4-(tert-butyl 1-methoxy-1-oxo-2-oxopropyl)benzoyl)phenyl groups. The <sup>13</sup>C NMR spectrum (CDCl<sub>3</sub>) displays peaks corresponding to the structure, with chemical shifts ranging from approximately 19.4 to 195.1 ppm. Key peaks include carbonyl carbons at ~195.1 and ~173.0 ppm, aromatic and quaternary carbons in the 116.6–145.2 ppm range, and aliphatic carbons of the tert-butyl and methoxy groups in the 19.4–53.4 ppm range.

[illegible]

**$^{13}\text{C}\{^1\text{H}\}$  NMR (101 MHz,  $\text{CDCl}_3$ ) spectra of compound 9**

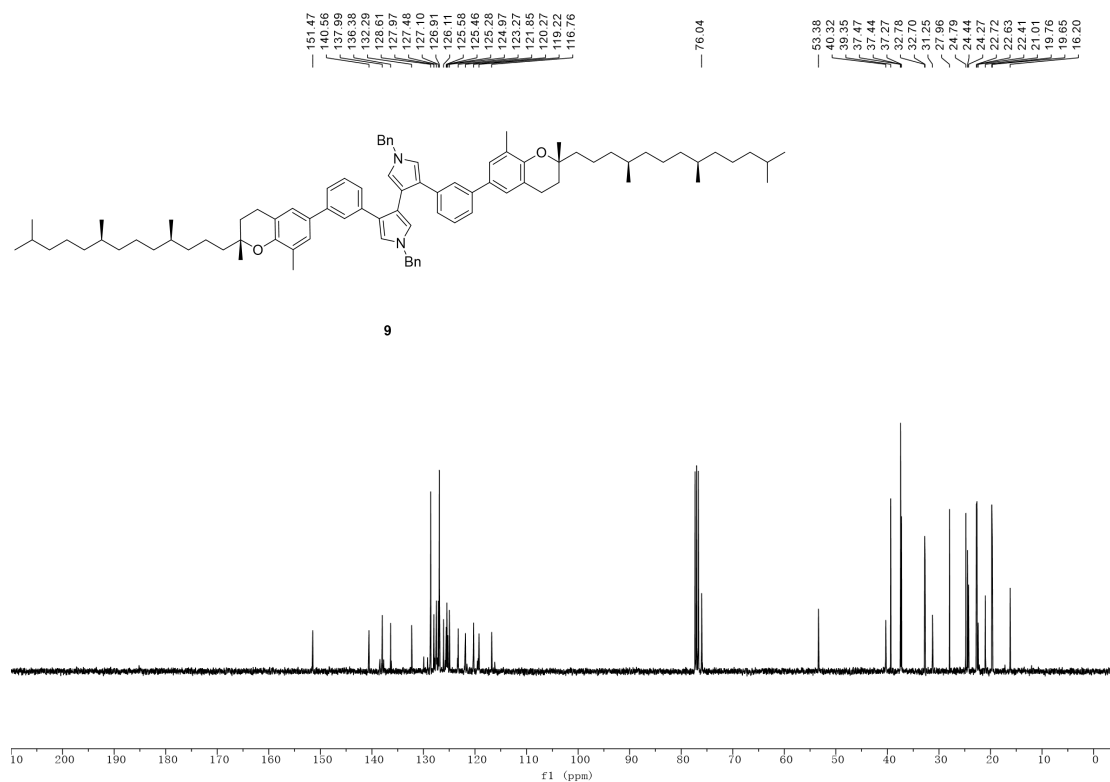

**$^1\text{H}$  NMR (400 MHz,  $\text{CDCl}_3$ ) spectra of compound 10**

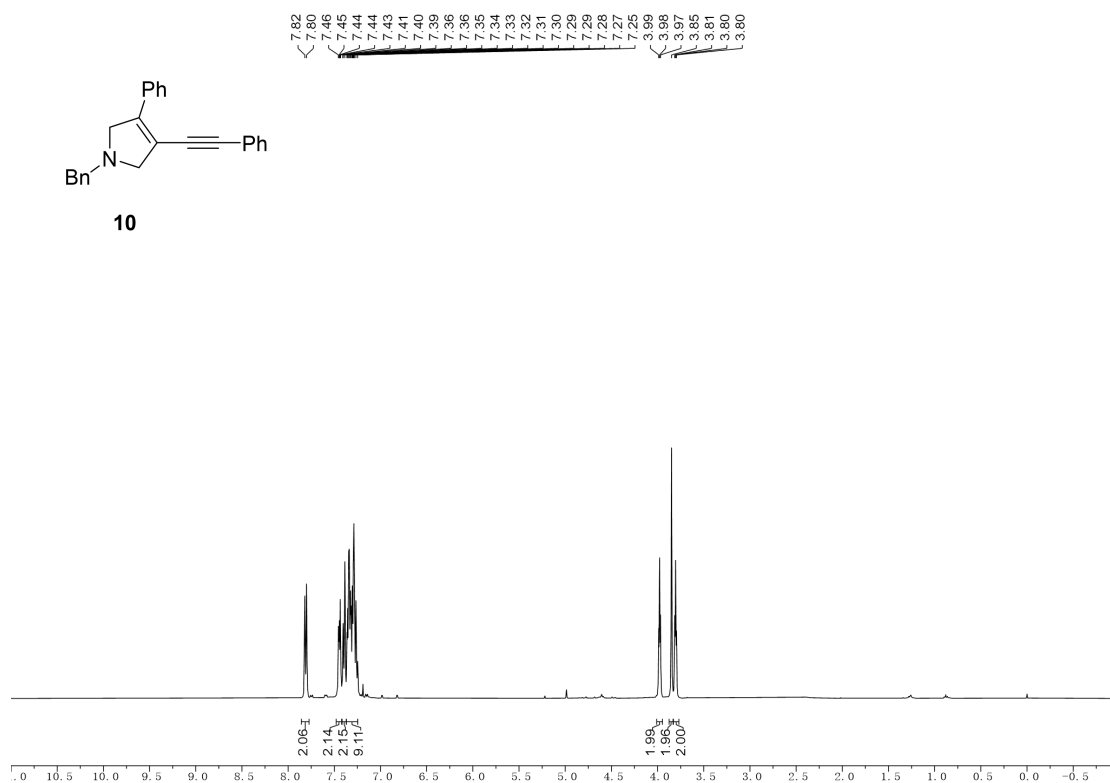



**$^{13}\text{C}\{^1\text{H}\}$  NMR (101 MHz,  $\text{CDCl}_3$ ) spectra of compound 10**

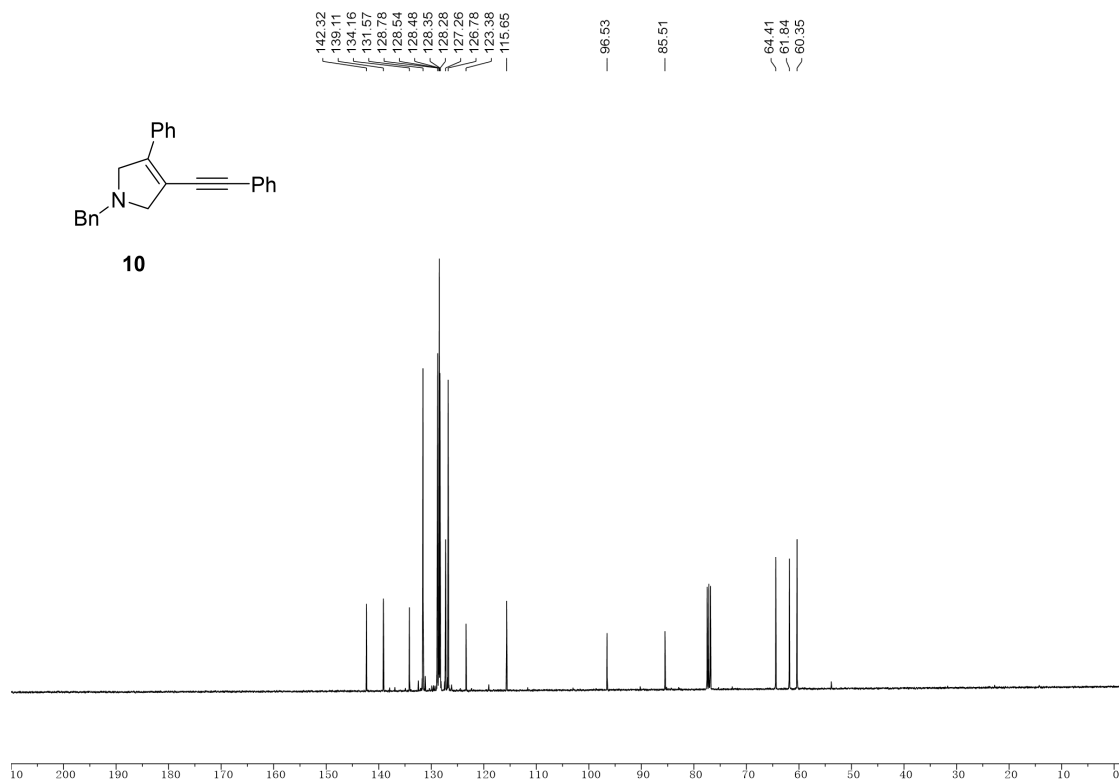

**$^1\text{H}$  NMR (400 MHz,  $\text{CDCl}_3$ ) spectra of compound 11**

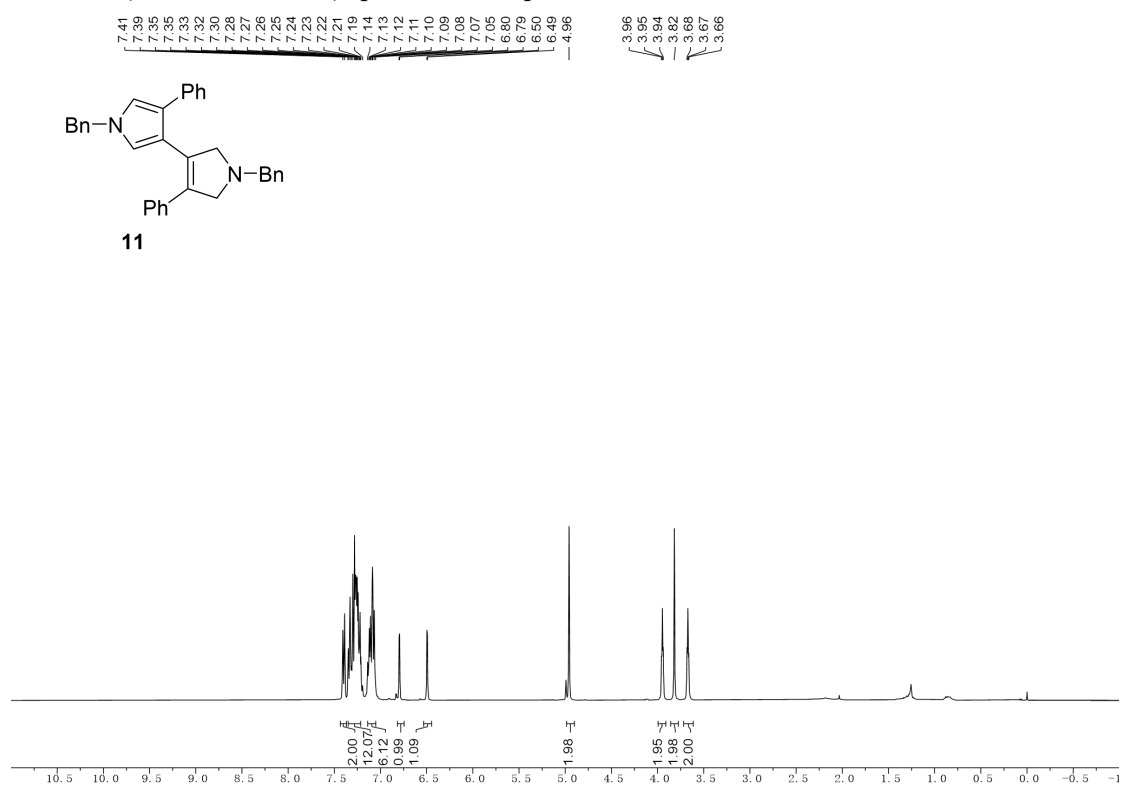

**$^{13}\text{C}\{^1\text{H}\}$  NMR (101 MHz,  $\text{CDCl}_3$ ) spectra of compound 11**

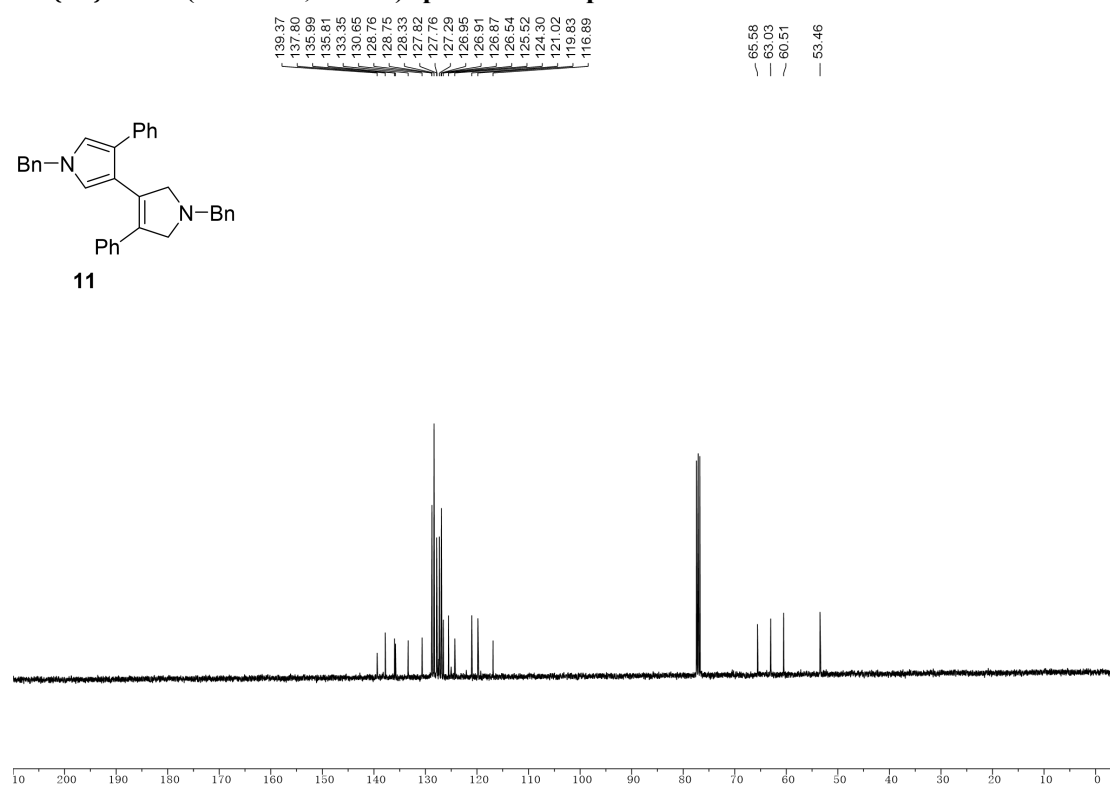

## 17.HRMS copies of the compounds

**3a.** HRMS (ESI) calcd for  $C_{34}H_{33}N_2^+$   $m/z$  469.2644  $[M+H]^+$ , Found 469.2647.

### Elemental Composition Report

#### Single Mass Analysis

Tolerance = 5.0 mDa / DBE: min = -1.5, max = 50.0

Element prediction: Off

Number of isotope peaks used for i-FIT = 3

Monoisotopic Mass, Even Electron Ions

3132 formula(e) evaluated with 1 results within limits (up to 50 closest results for each mass)

Elements Used:

C: 34-34 H: 33-33 N: 0-30 O: 0-100 Na: 0-8

32

241102-2-T-471 13 (0.105)

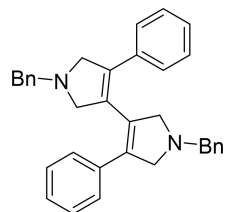

**3a**

Page 1

1: TOF MS ES+  
2.37e+006

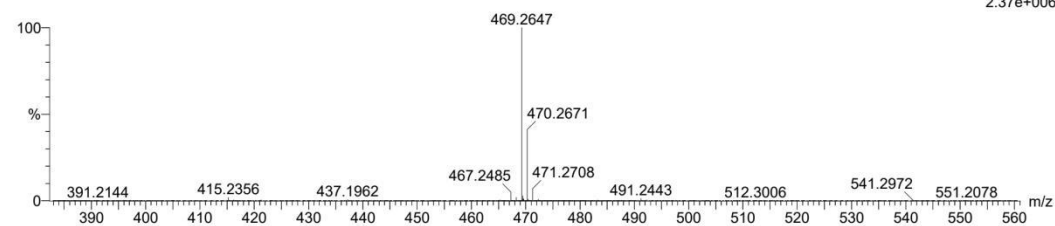

Minimum: -1.5  
Maximum: 5.0 10.0 50.0

| Mass     | Calc. Mass | mDa | PPM | DBE  | i-FIT | Norm | Conf(%) | Formula                                        |
|----------|------------|-----|-----|------|-------|------|---------|------------------------------------------------|
| 469.2647 | 469.2644   | 0.3 | 0.6 | 19.5 | 835.5 | n/a  | n/a     | C <sub>34</sub> H <sub>33</sub> N <sub>2</sub> |

**3b.** HRMS (ESI) calcd for  $C_{36}H_{37}N_2^+$   $m/z$  497.2951  $[M+H]^+$ , Found 497.2946.

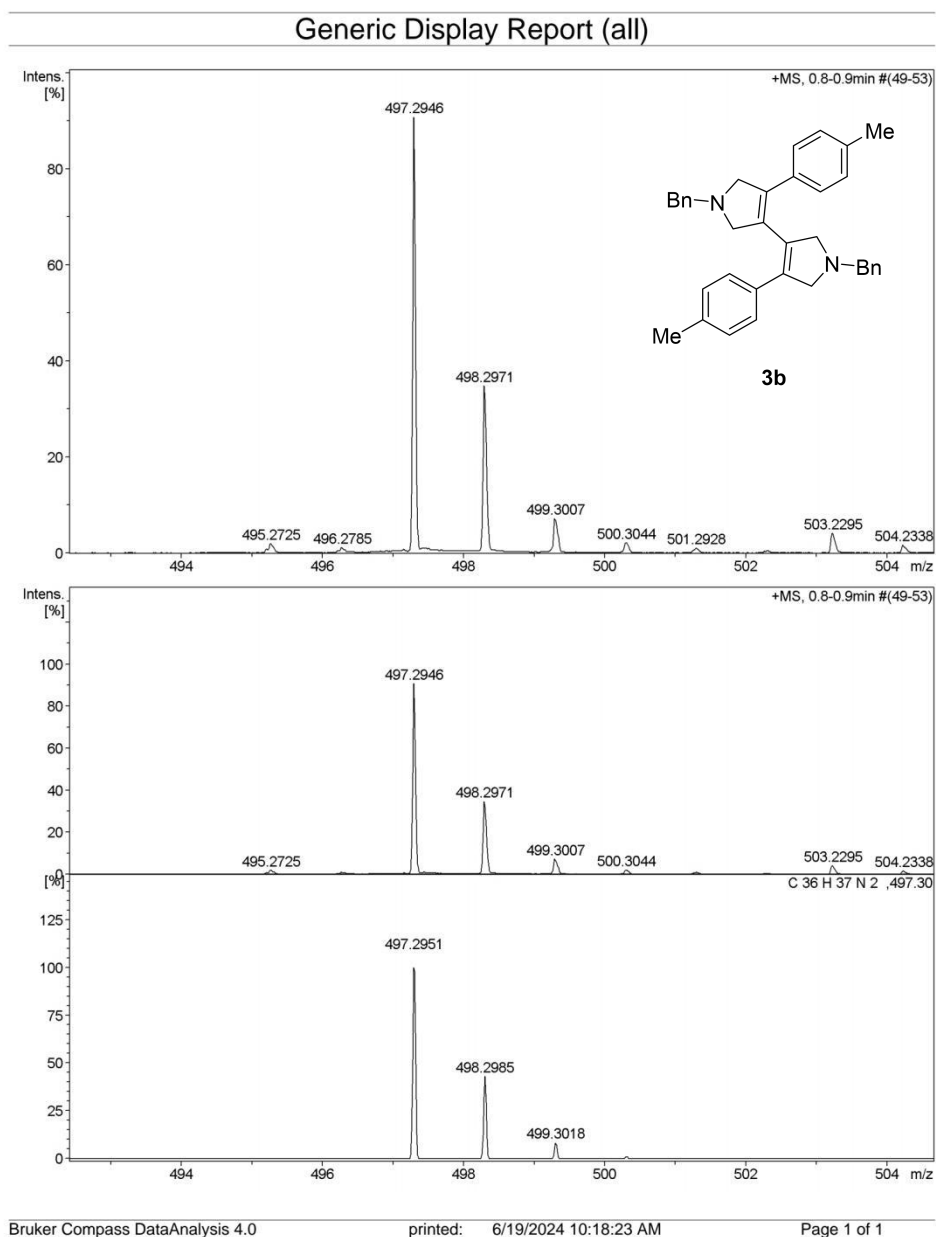

**3c.** HRMS (ESI) calcd for  $C_{38}H_{41}N_2^+$   $m/z$  525.3264  $[M+H]^+$ , Found 525.3270.

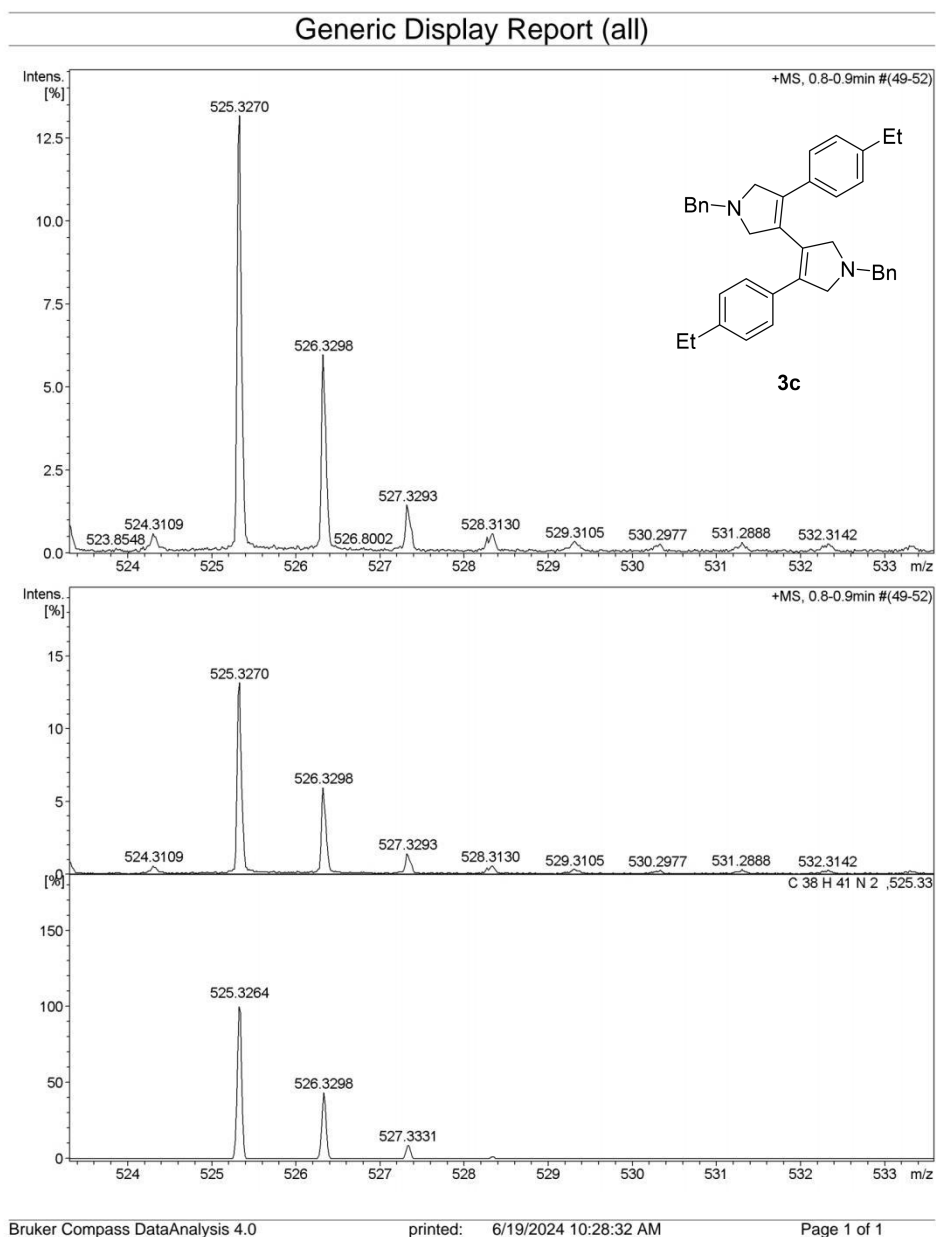

**3d.** HRMS (ESI) calcd for  $C_{40}H_{45}N_2^+$   $m/z$  553.3577  $[M+H]^+$ , Found 553.3567.

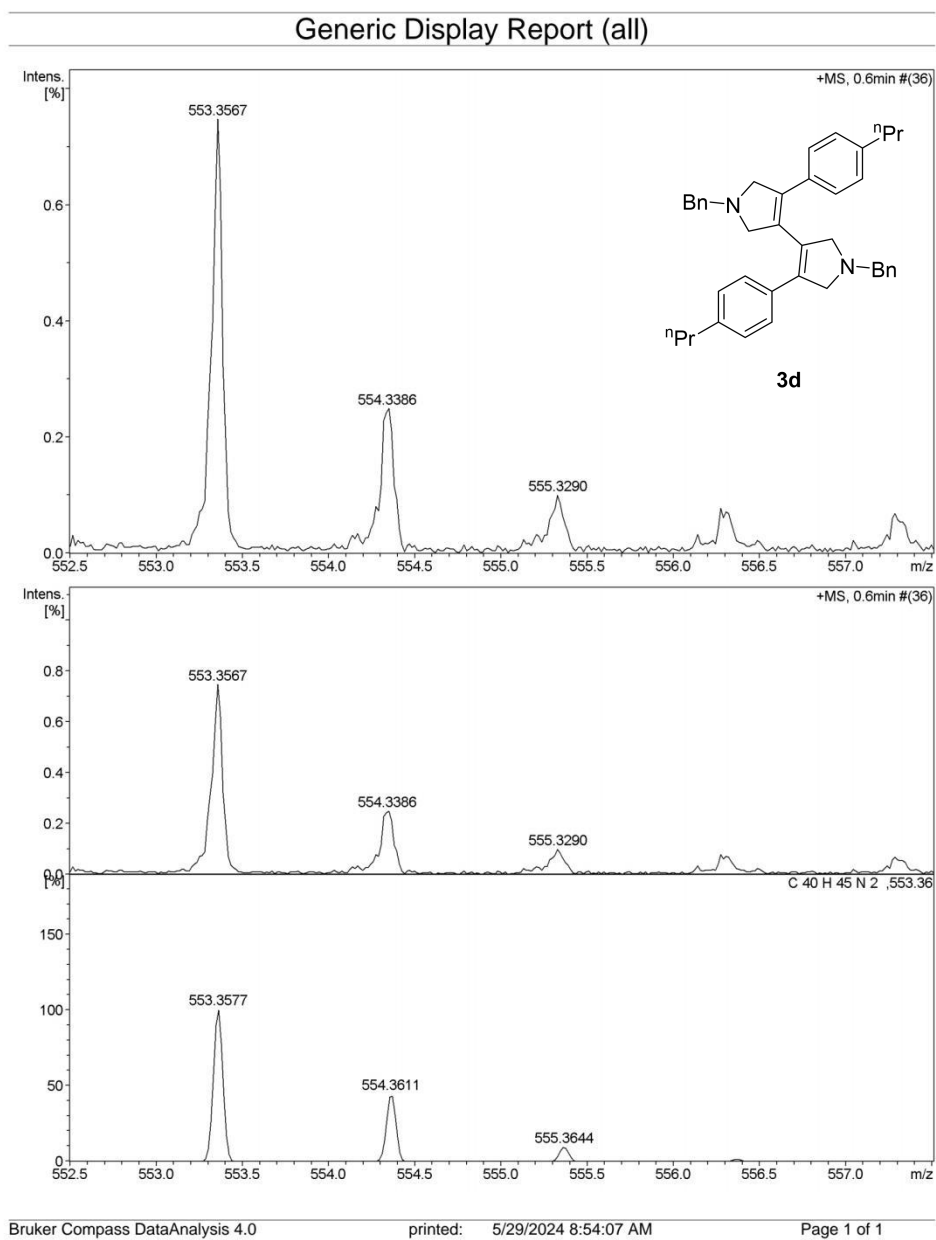

**3e. HRMS (ESI) calcd for C<sub>42</sub>H<sub>48</sub>N<sub>2</sub>Na<sup>+</sup> *m/z* 603.3710 [M+Na]<sup>+</sup>, Found 603.3718.**

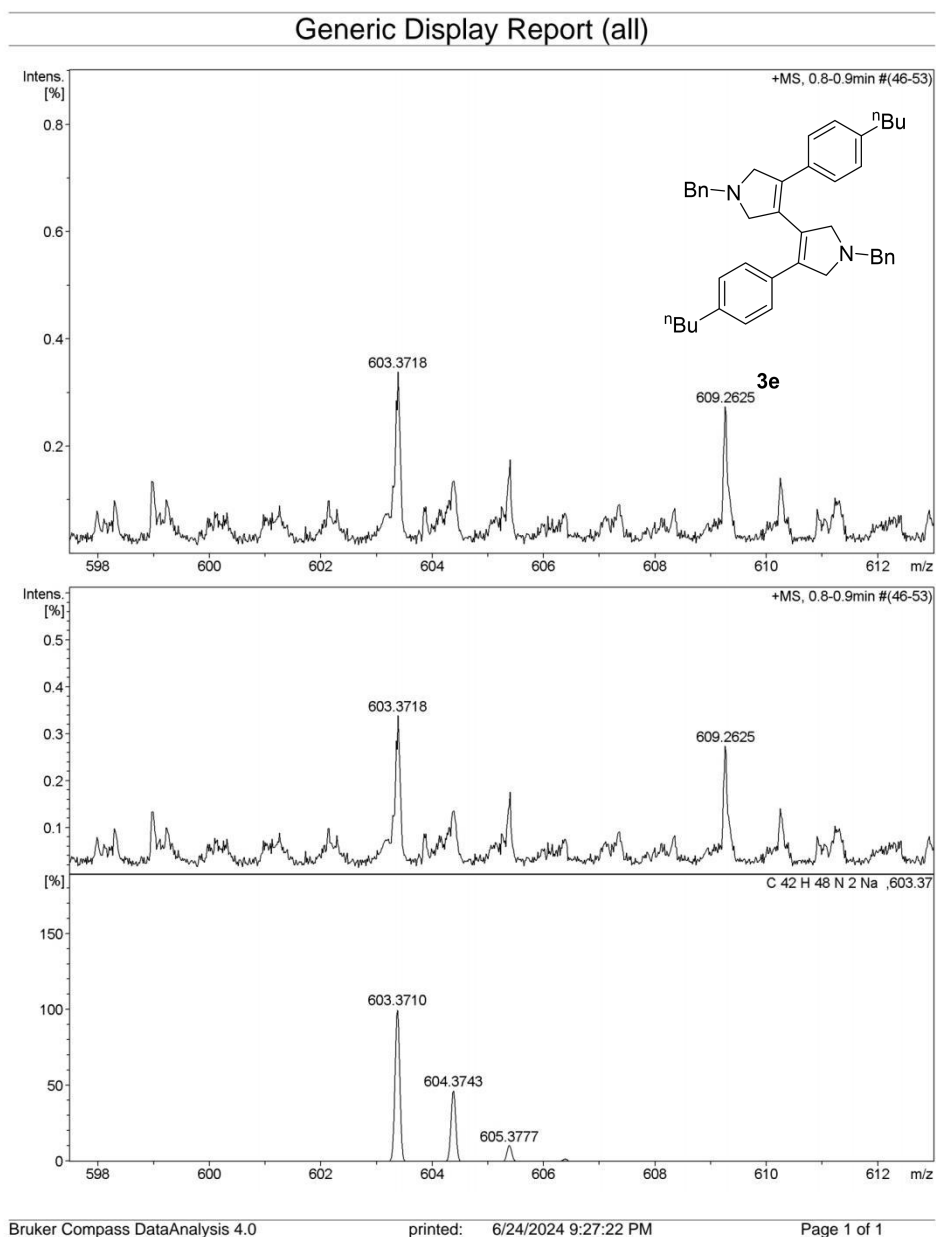

**3f. HRMS (ESI) calcd for C<sub>42</sub>H<sub>49</sub>N<sub>2</sub><sup>+</sup> *m/z* 581.3890 [M+H]<sup>+</sup>, Found 581.3880.**

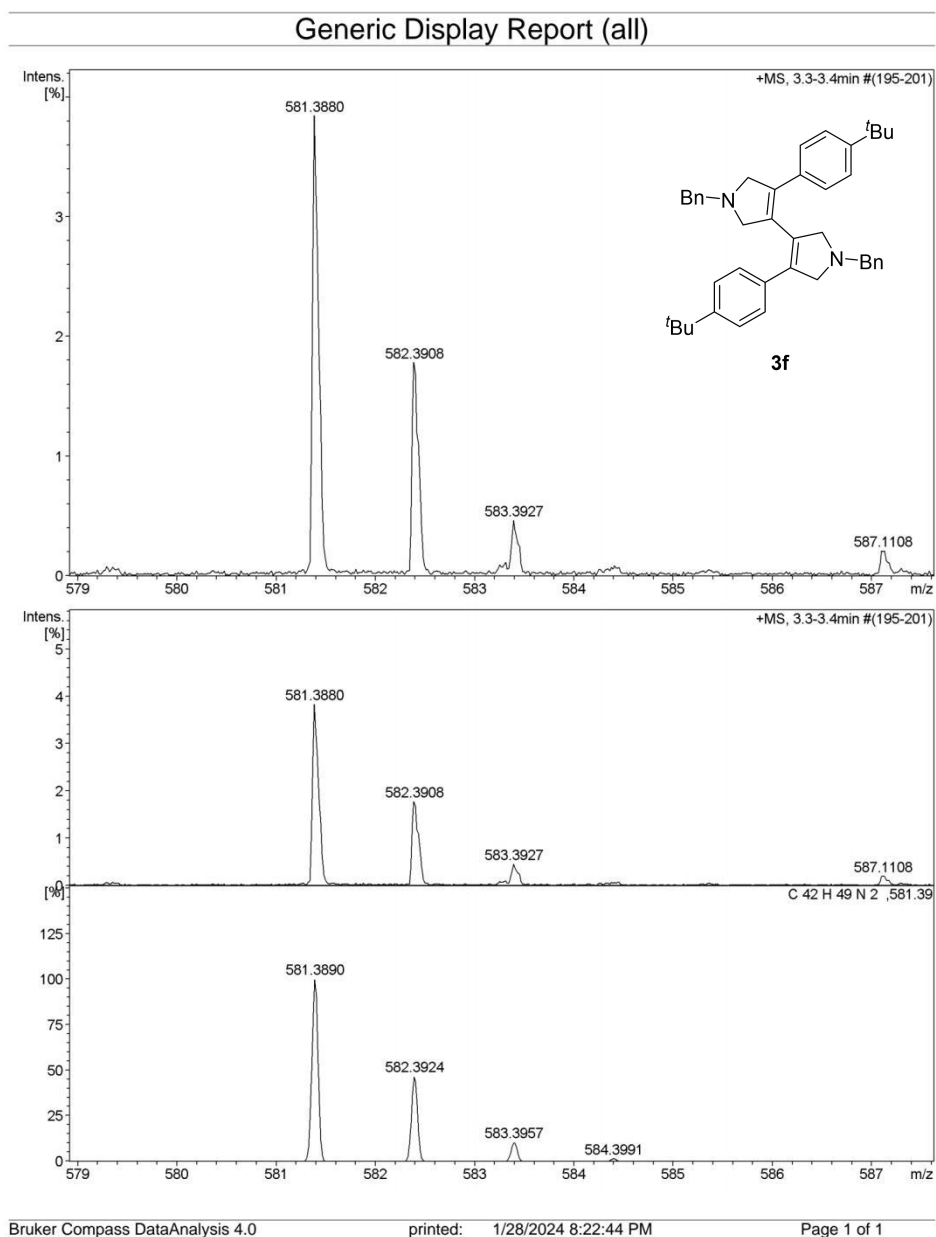



**3g. HRMS** (ESI) calcd for  $C_{44}H_{53}N_2^+$   $m/z$  609.4203  $[M+H]^+$ , Found 609.4198.

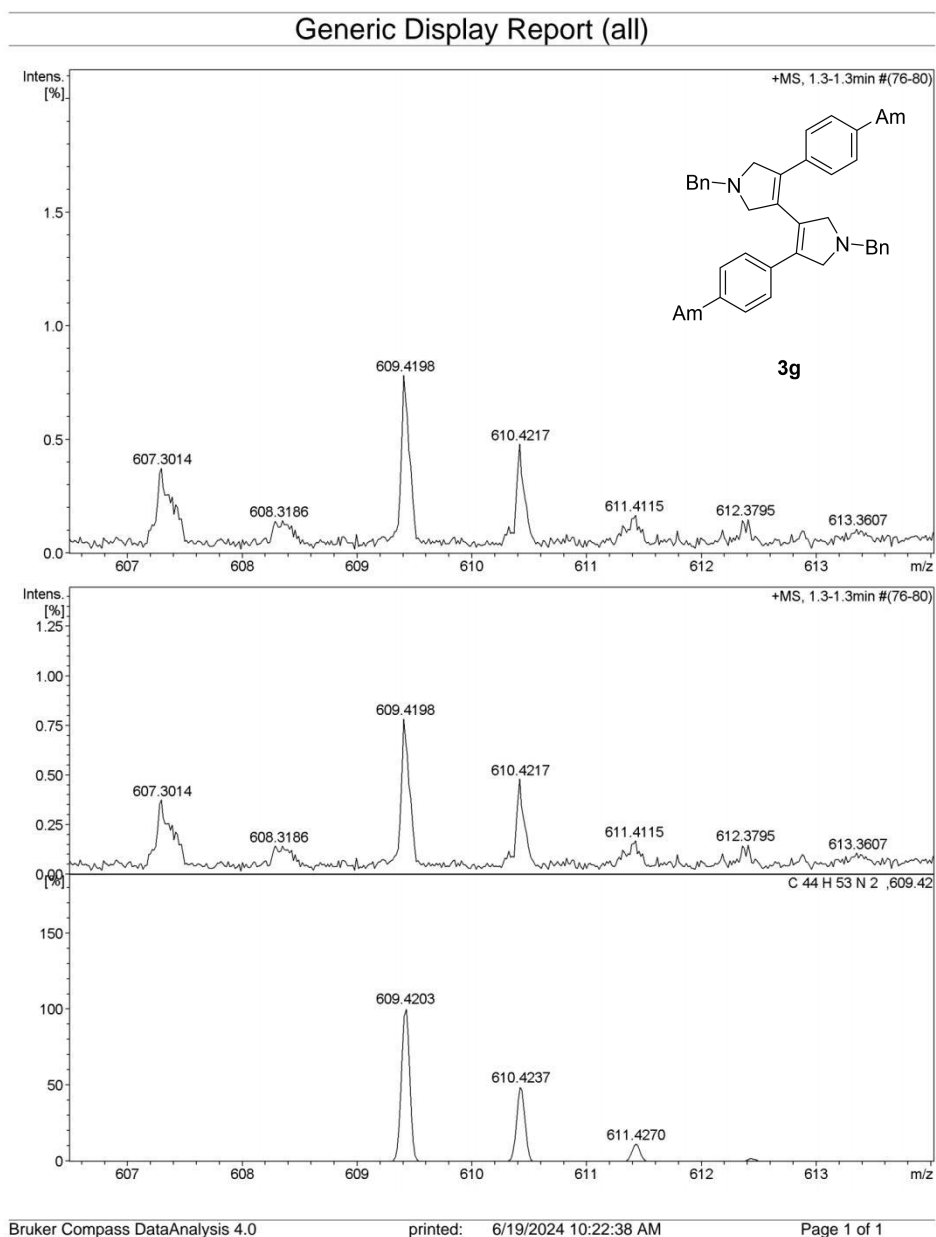

### 3h. HRMS (ESI) calcd for C<sub>46</sub>H<sub>41</sub>N<sub>2</sub><sup>+</sup> *m/z* 621.3270 [M+H]<sup>+</sup>, Found 621.3275.

#### Elemental Composition Report

Page 1

#### Single Mass Analysis

Tolerance = 5.0 mDa / DBE: min = -1.5, max = 50.0

Element prediction: Off

Number of isotope peaks used for i-FIT = 3

Monoisotopic Mass, Even Electron Ions

5678 formula(e) evaluated with 1 results within limits (up to 50 closest results for each mass)

Elements Used:

C: 46-46 H: 41-41 N: 0-30 O: 0-100 Na: 0-8

32

241102-2-T-443-1 26 (0.173)

1: TOF MS ES+  
8.04e+005

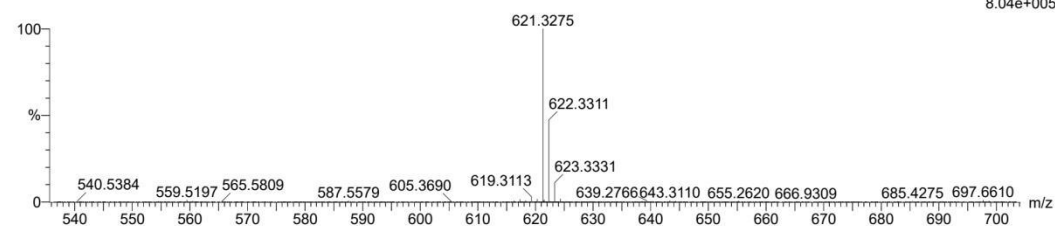

Minimum: -1.5  
Maximum: 50.0

| Mass     | Calc. Mass | mDa | PPM | DBE  | i-FIT | Norm | Conf (%) | Formula                                        |
|----------|------------|-----|-----|------|-------|------|----------|------------------------------------------------|
| 621.3275 | 621.3270   | 0.5 | 0.8 | 27.5 | 666.0 | n/a  | n/a      | C <sub>46</sub> H <sub>41</sub> N <sub>2</sub> |

**3i. HRMS (ESI) calcd for C<sub>34</sub>H<sub>31</sub>F<sub>2</sub>N<sub>2</sub><sup>+</sup> *m/z* 505.2450 [M+H]<sup>+</sup>, Found 505.2446.**

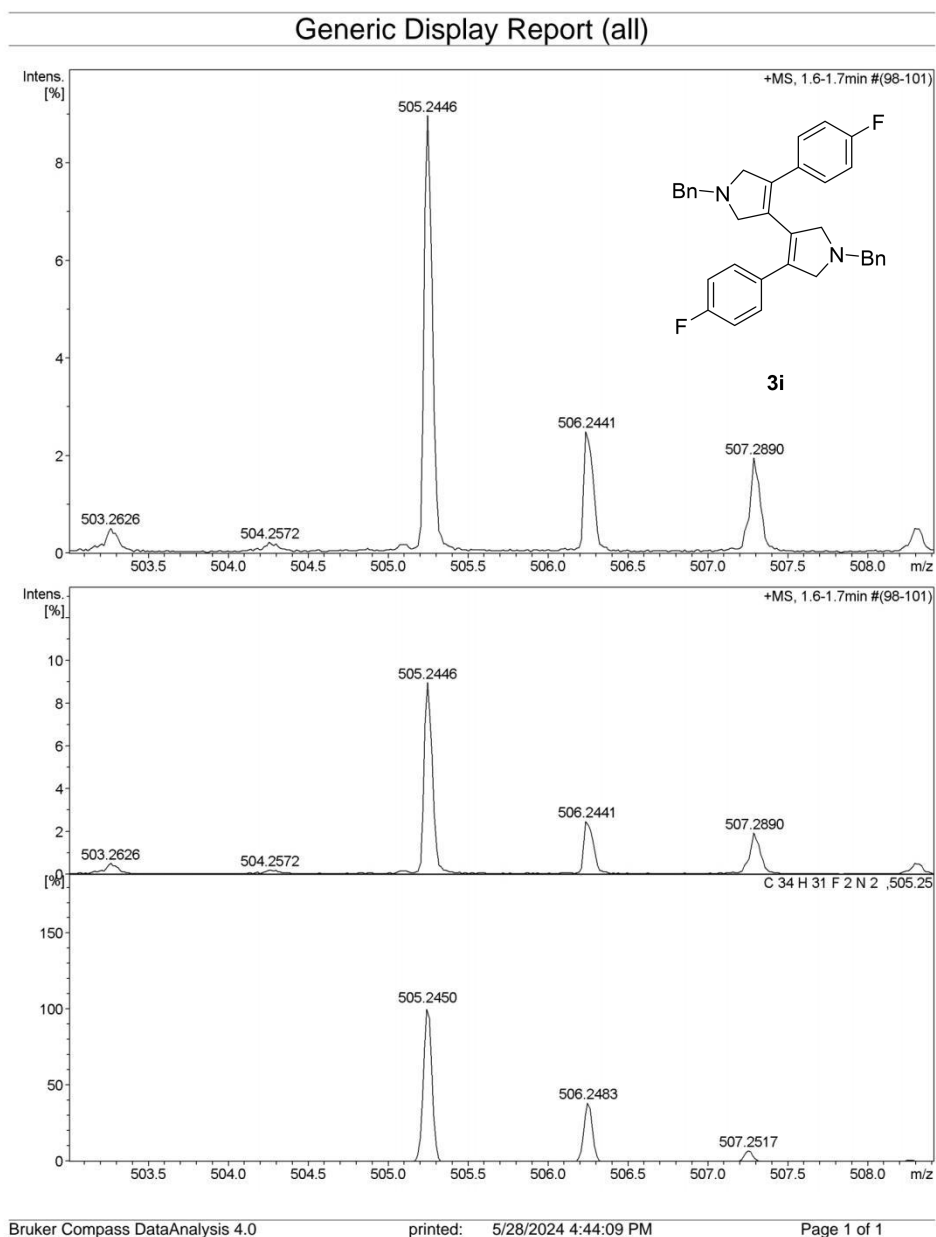

**3j. HRMS** (ESI) calcd for  $C_{36}H_{37}N_2O_2^+$   $m/z$  529.2850  $[M+H]^+$ , Found 529.2840.

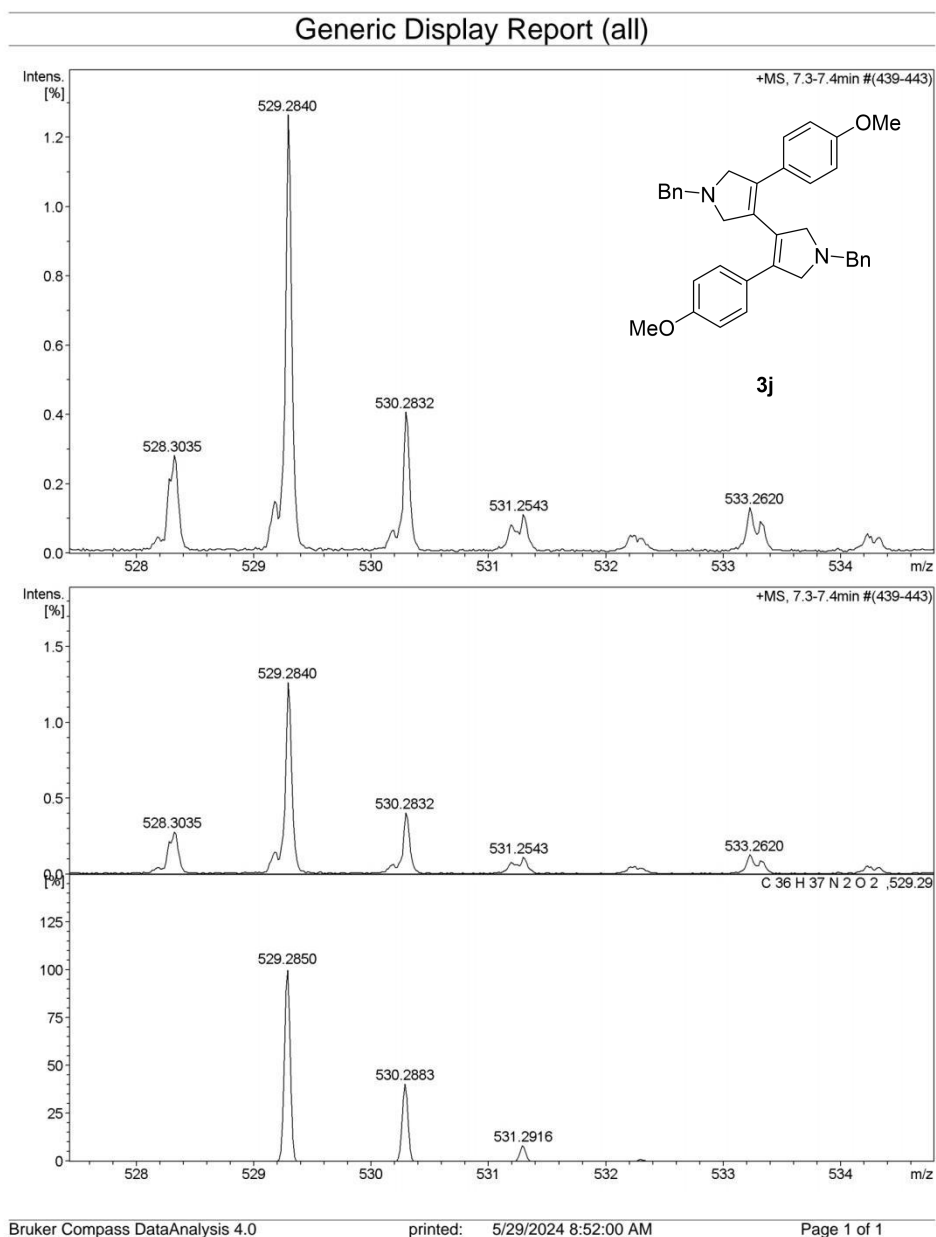

**3k.** HRMS (ESI) calcd for C<sub>36</sub>H<sub>37</sub>N<sub>2</sub><sup>+</sup> *m/z* 497.2951 [M+H]<sup>+</sup>, Found 497.2945.

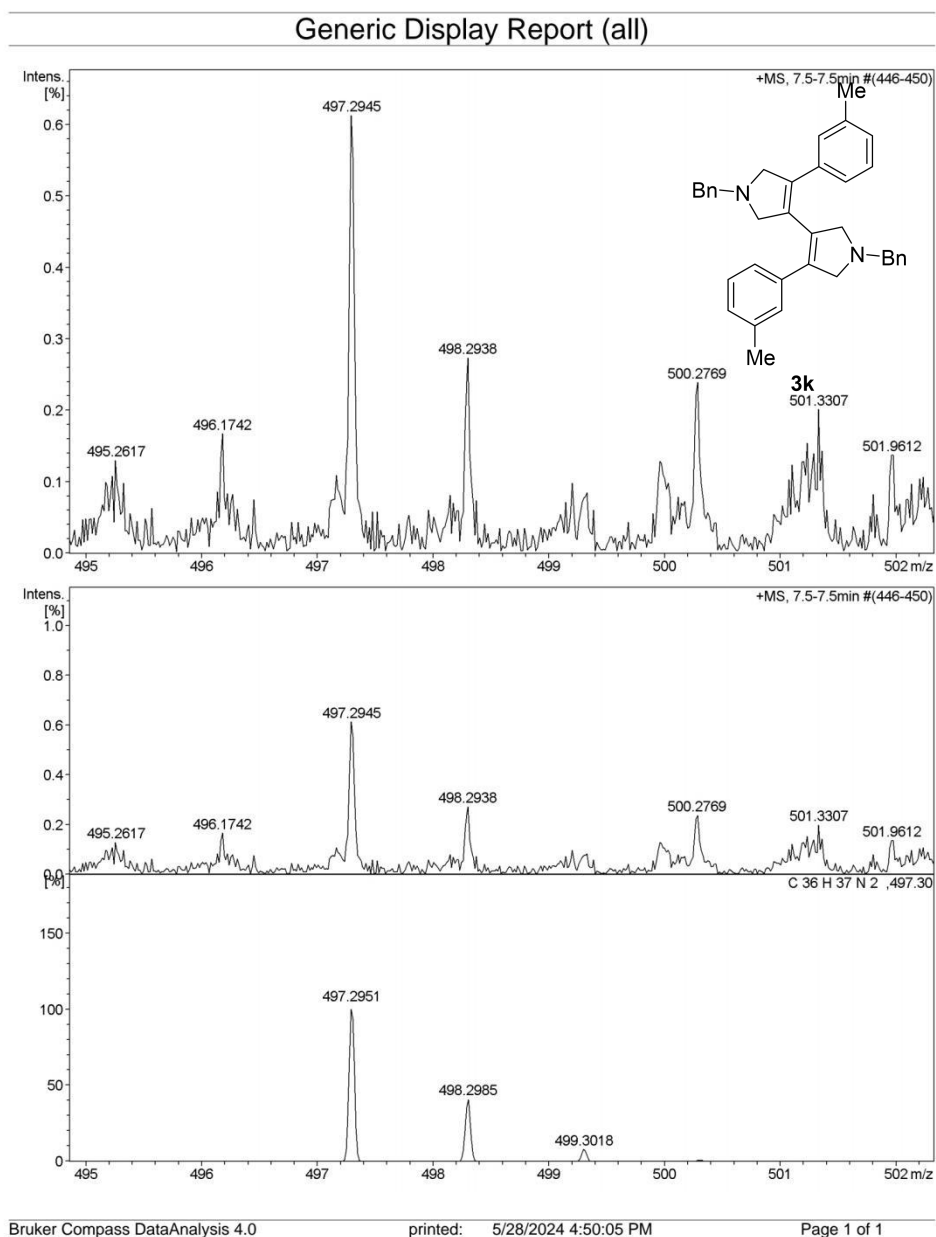

**3l.HRMS** (ESI) calcd for  $C_{34}H_{31}F_2N_2^+$   $m/z$  505.2450  $[M+H]^+$ , Found 505.2441.

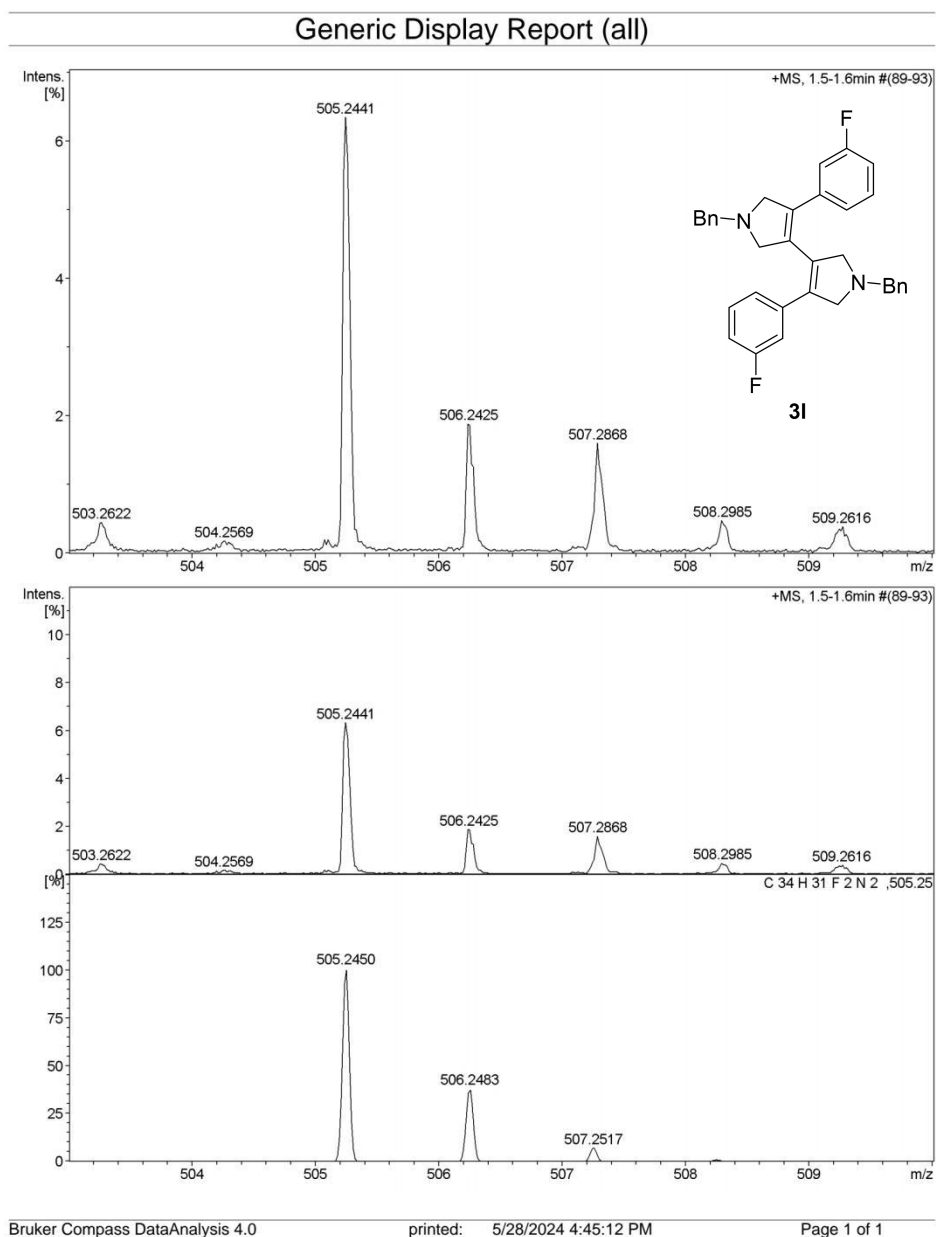

**3m. HRMS (ESI) calcd for C<sub>34</sub>H<sub>31</sub>Cl<sub>2</sub>N<sub>2</sub><sup>+</sup> *m/z* 537.1859 [M+H]<sup>+</sup>, Found 537.1864.**

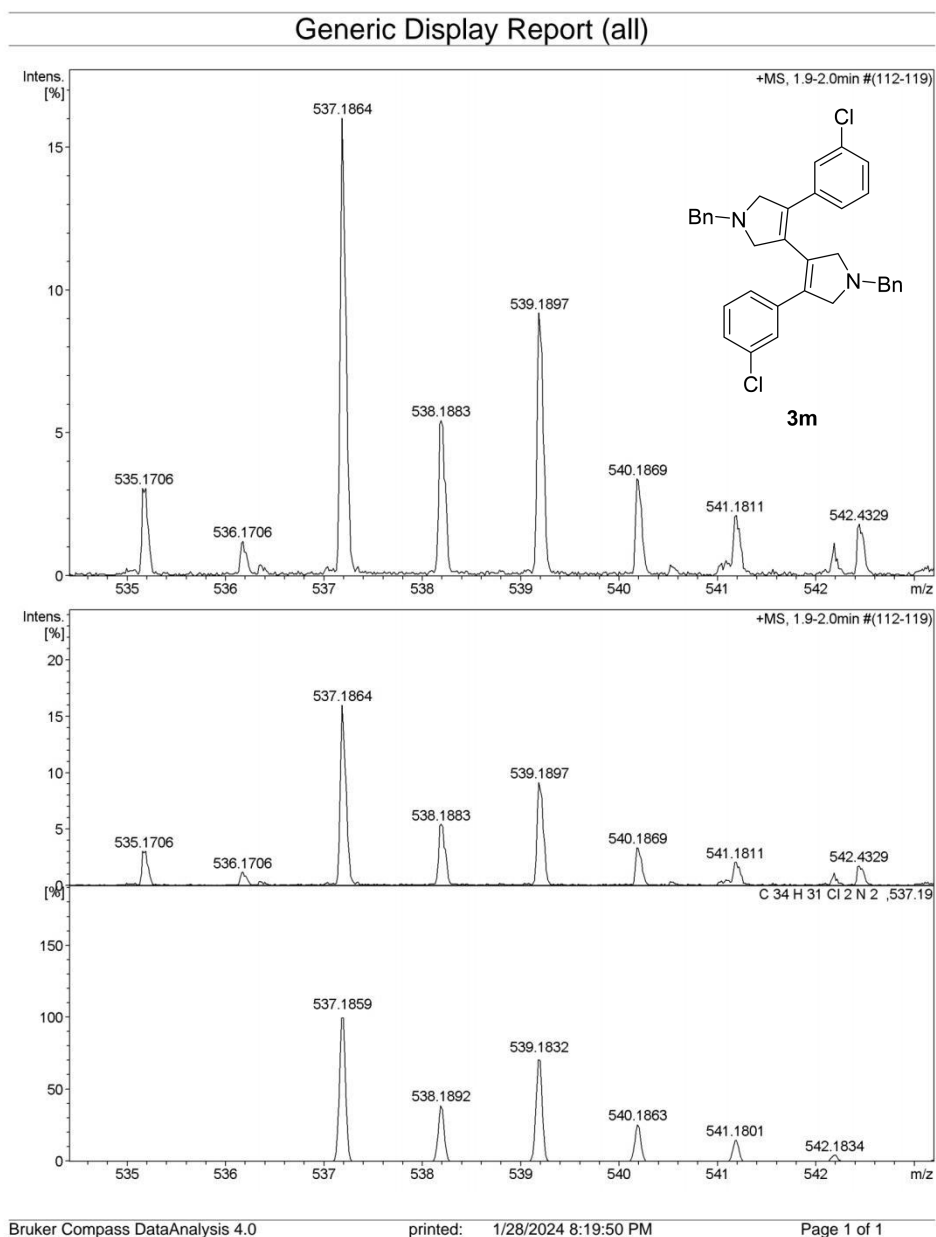

**3n.** HRMS (ESI) calcd for C<sub>34</sub>H<sub>31</sub>Br<sub>2</sub>N<sub>2</sub><sup>+</sup> *m/z* 625.0849 [M+H]<sup>+</sup>, Found 625.0842.

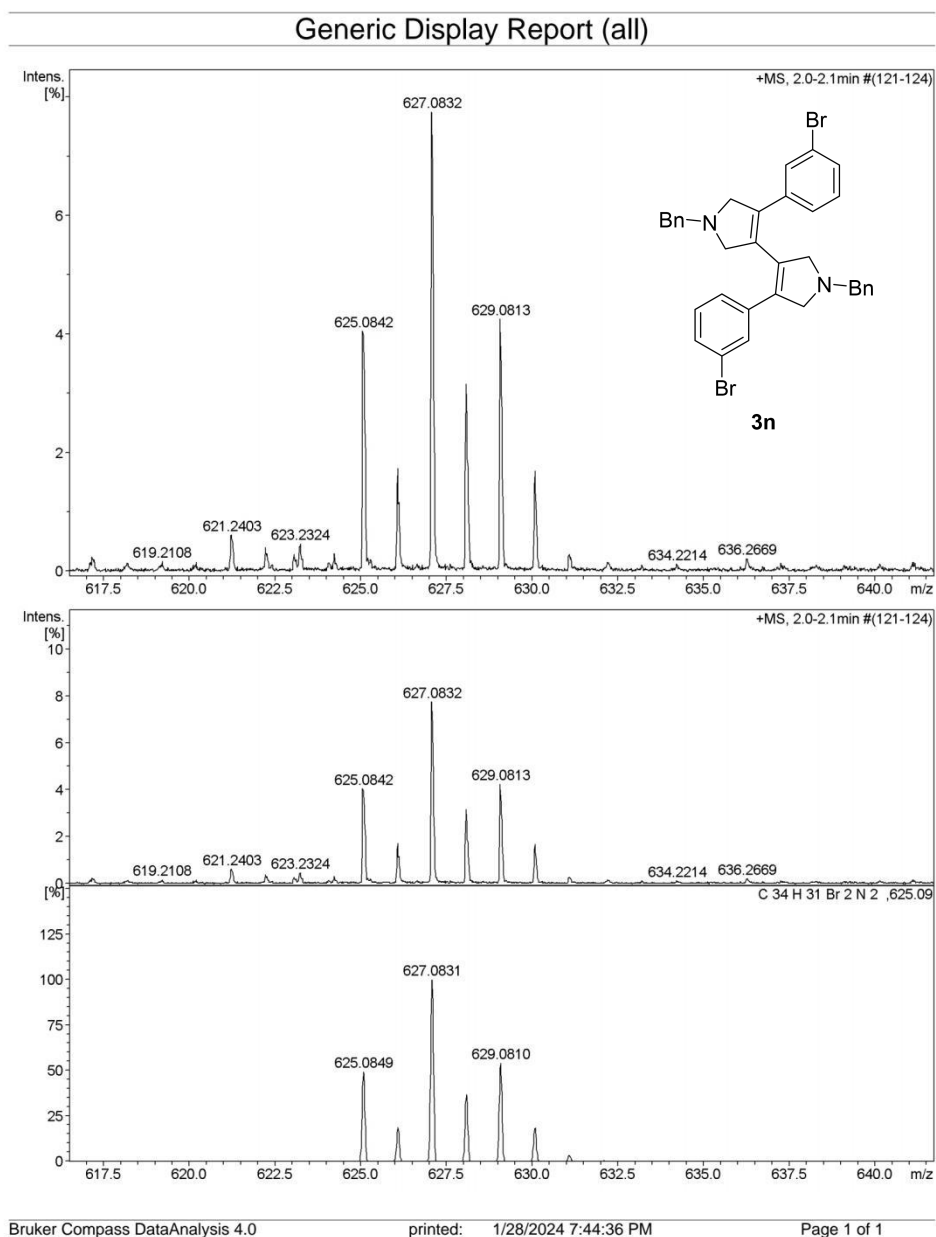



**3o.** HRMS (ESI) calcd for C<sub>36</sub>H<sub>37</sub>N<sub>2</sub>O<sub>2</sub><sup>+</sup> *m/z* 529.2850 [M+H]<sup>+</sup>, Found 529.2857.

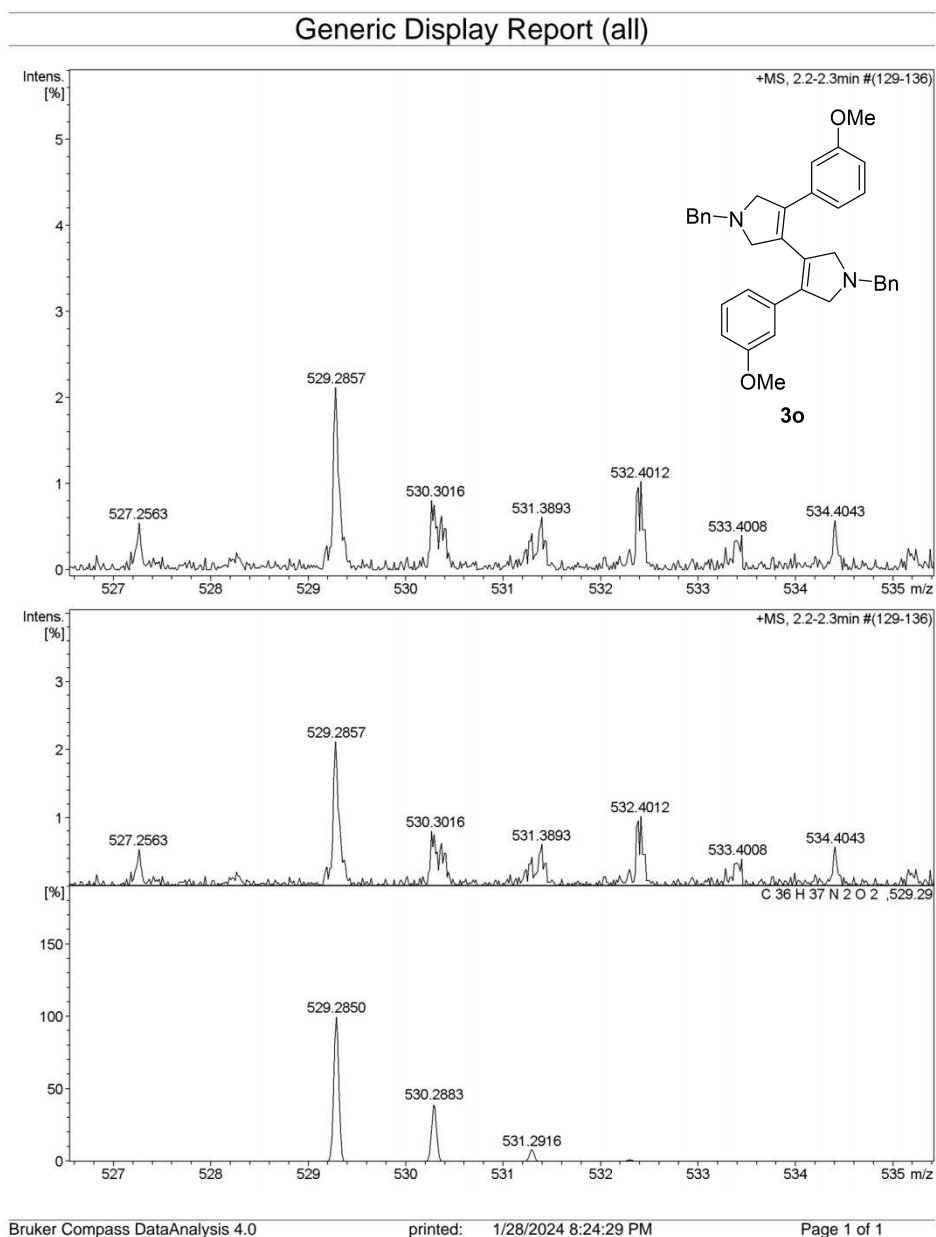

**3p.** HRMS (ESI) calcd for  $C_{36}H_{37}N_2^+$   $m/z$  497.2951  $[M+H]^+$ , Found 497.2942.

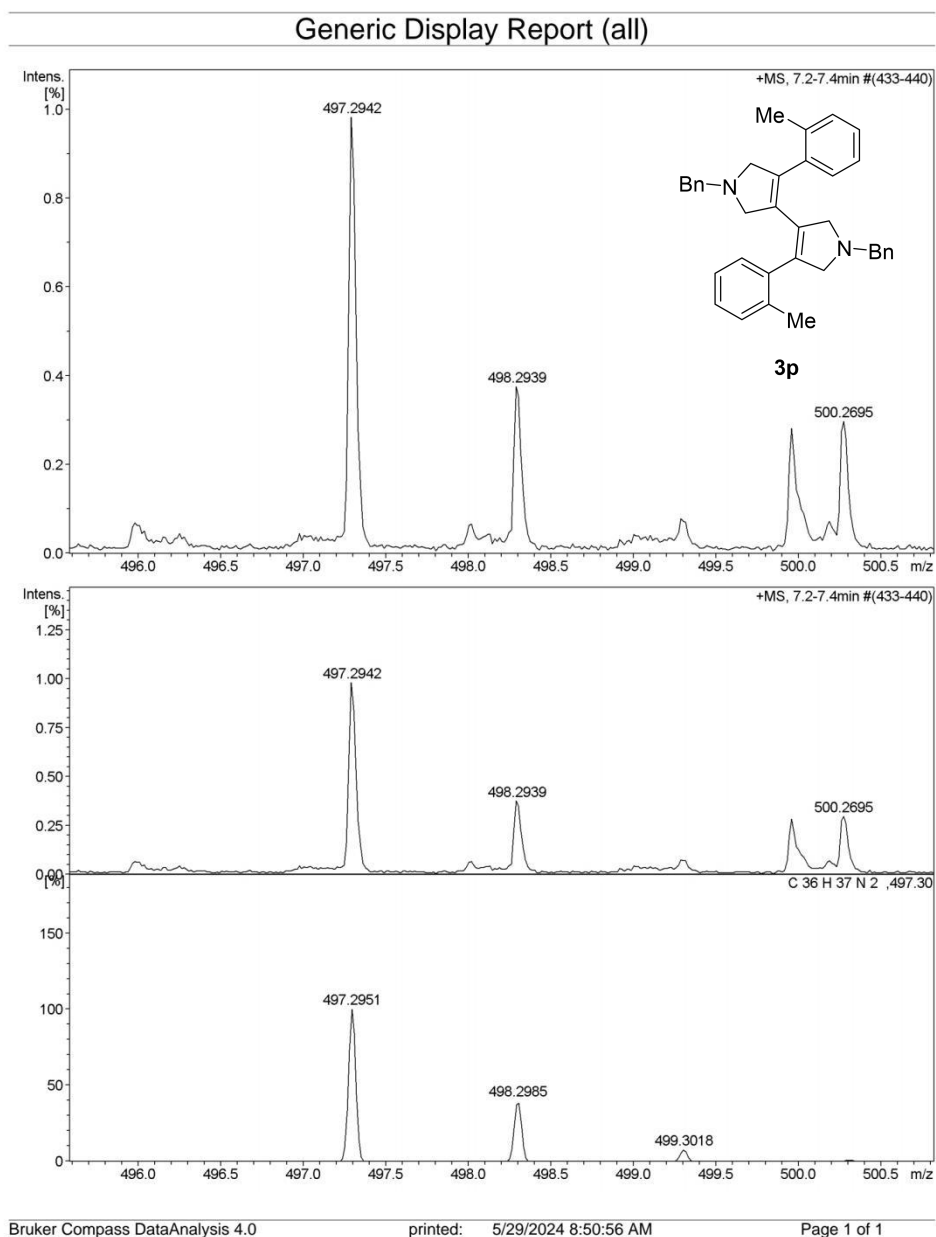

**3q.** HRMS (ESI) calcd for  $C_{34}H_{31}F_2N_2^+$   $m/z$  505.2450  $[M+H]^+$ , Found 505.2447.

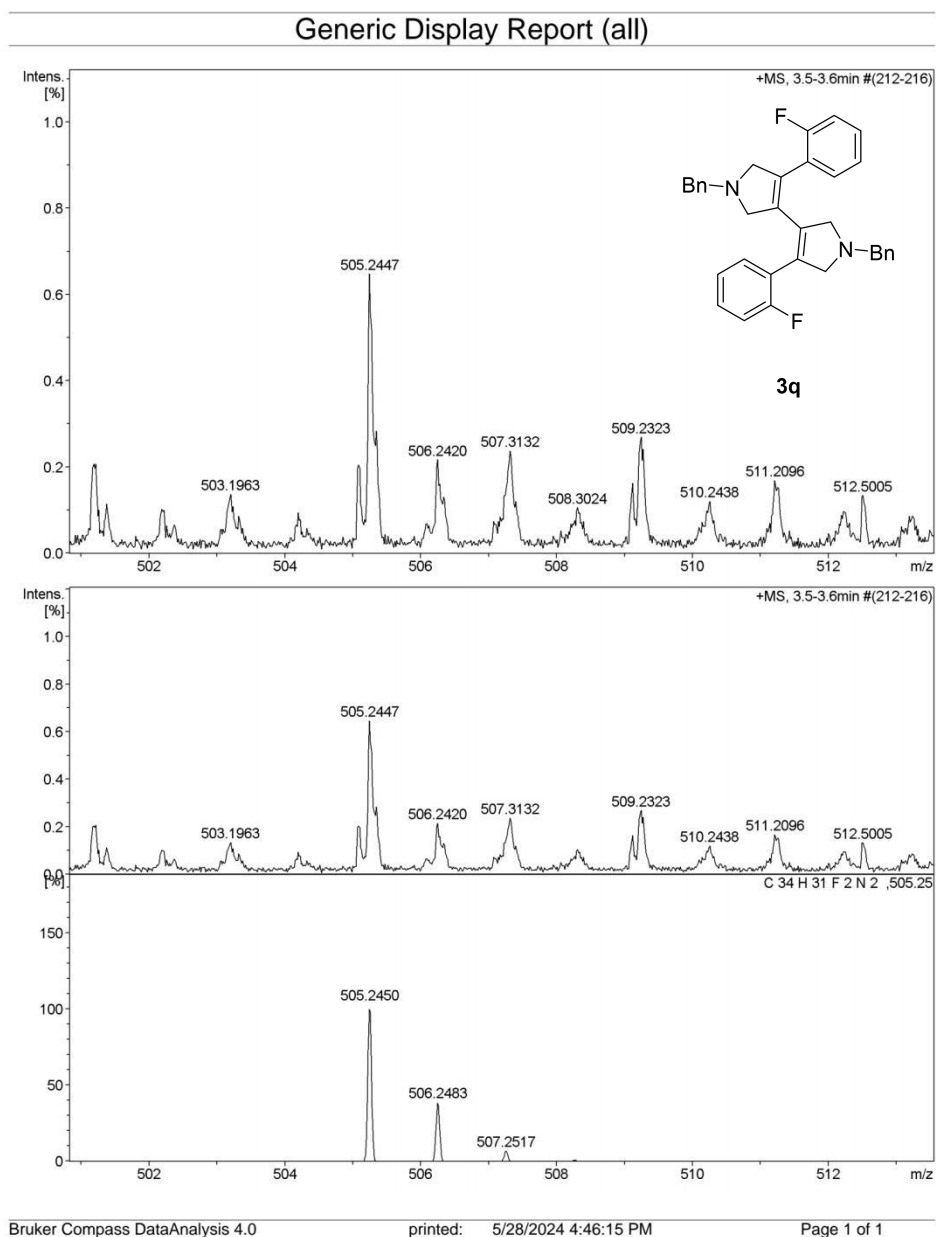

**3r.** HRMS (ESI) calcd for C<sub>34</sub>H<sub>31</sub>Cl<sub>2</sub>N<sub>2</sub><sup>+</sup> *m/z* 537.1859 [M+H]<sup>+</sup>, Found 537.1868.

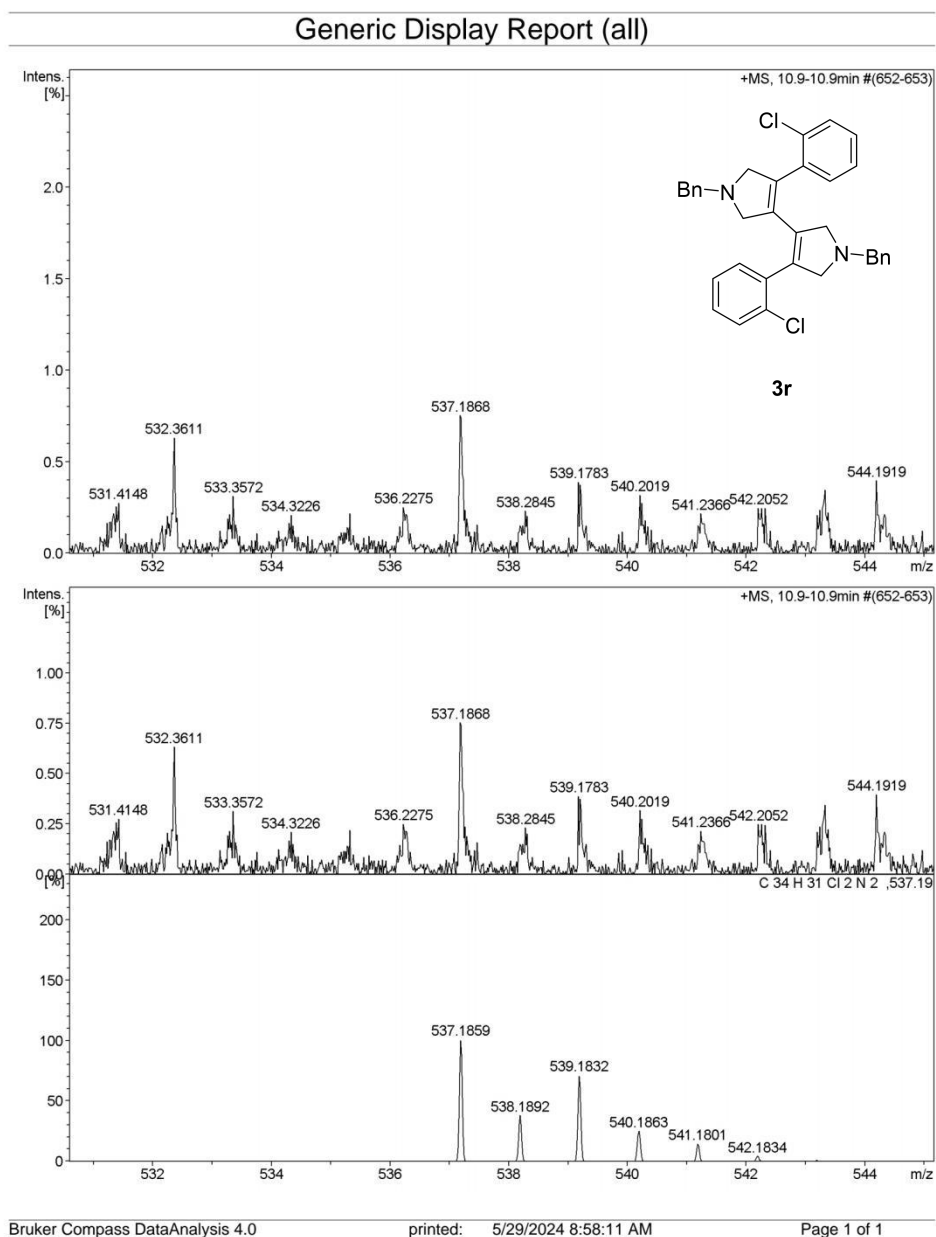

**3s. HRMS (ESI) calcd for C<sub>34</sub>H<sub>31</sub>Br<sub>2</sub>N<sub>2</sub> *m/z* 627.0831 [M+H]<sup>+</sup>, Found 627.0835.**

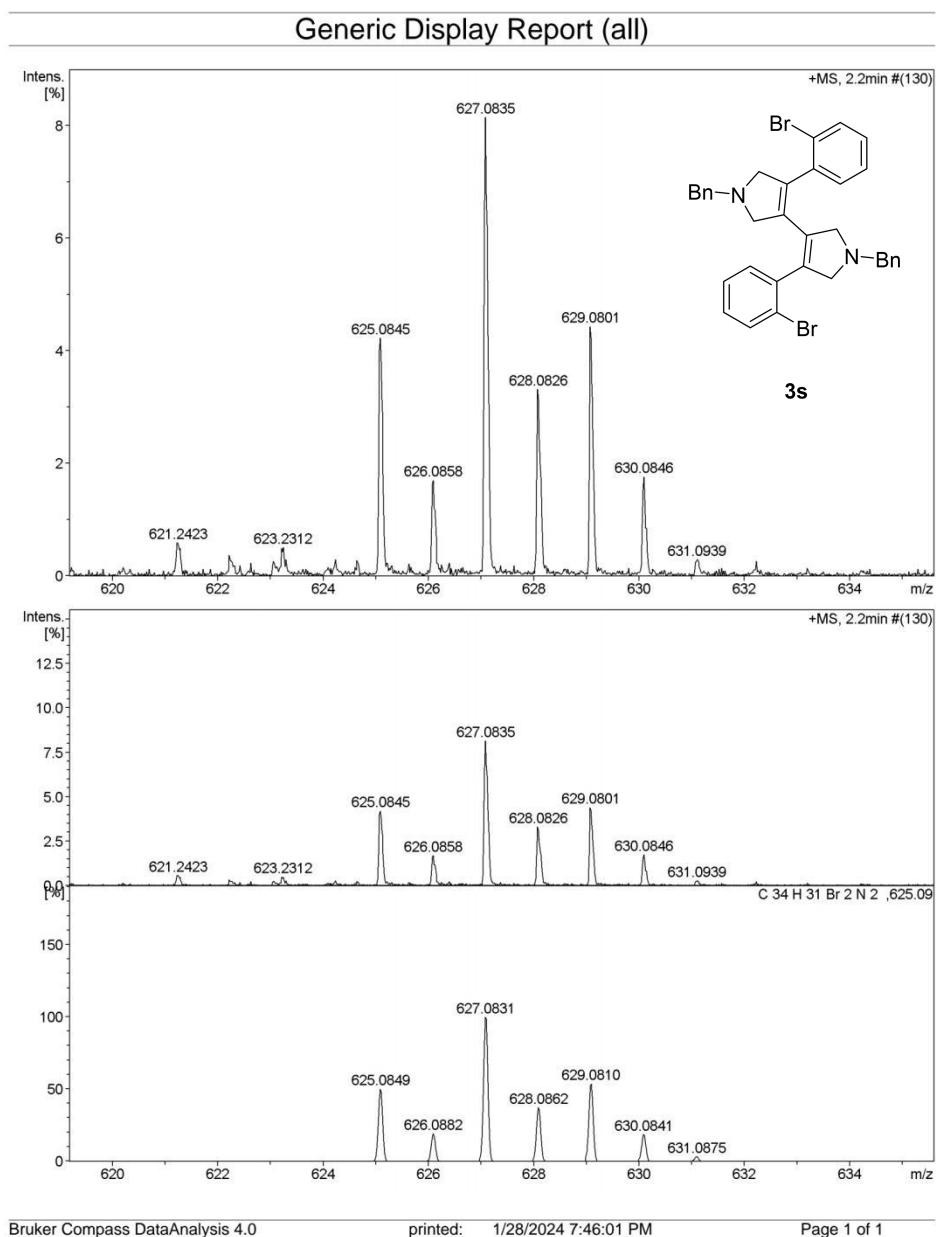

**3t. HRMS (ESI) calcd for C<sub>36</sub>H<sub>31</sub>F<sub>6</sub>N<sub>2</sub><sup>+</sup> *m/z* 605.2386 [M+H]<sup>+</sup>, Found 605.2396.**

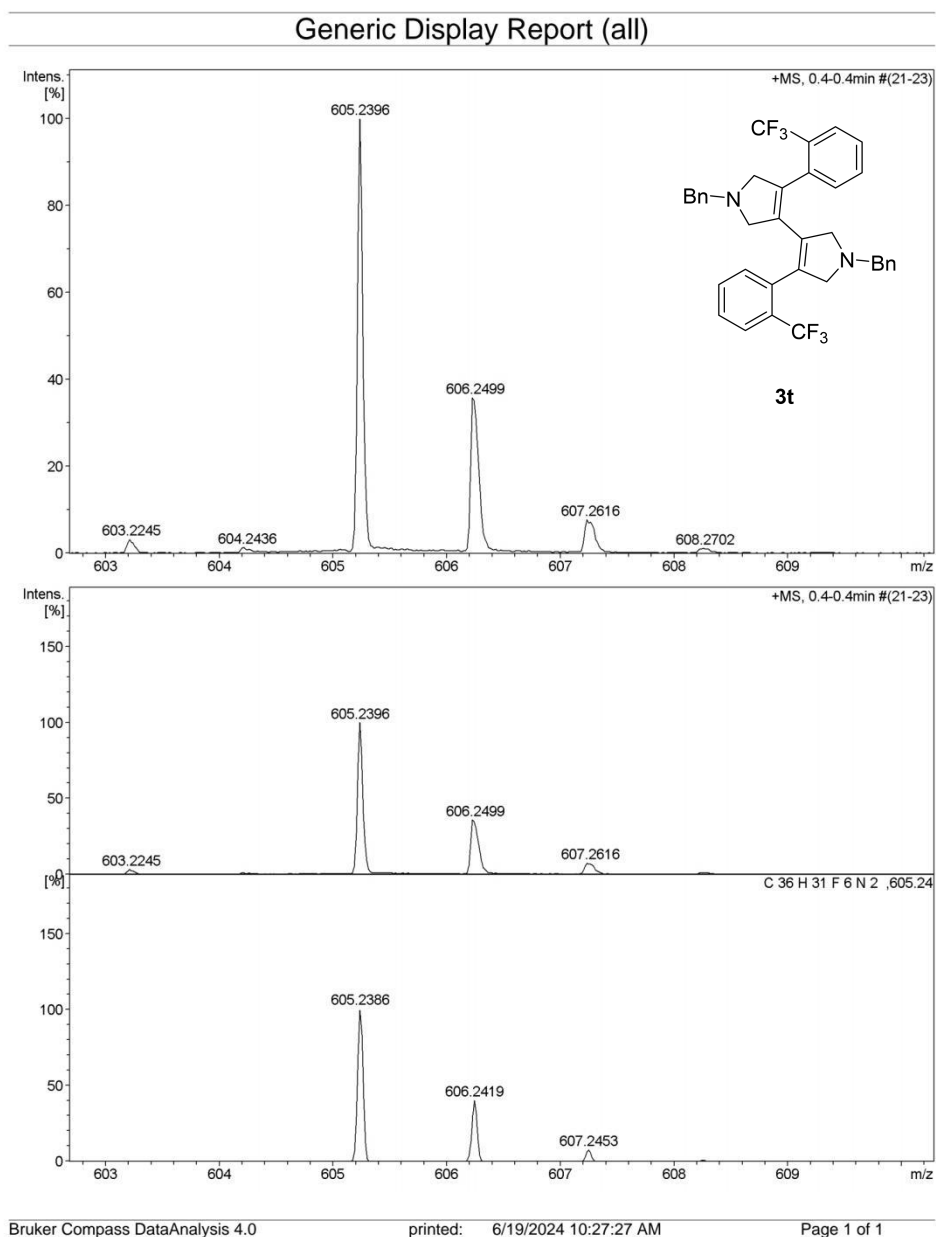

**3u.** HRMS (ESI) calcd for C<sub>42</sub>H<sub>37</sub>N<sub>2</sub><sup>+</sup> *m/z* 569.2951 [M+H]<sup>+</sup>, Found 569.2963.

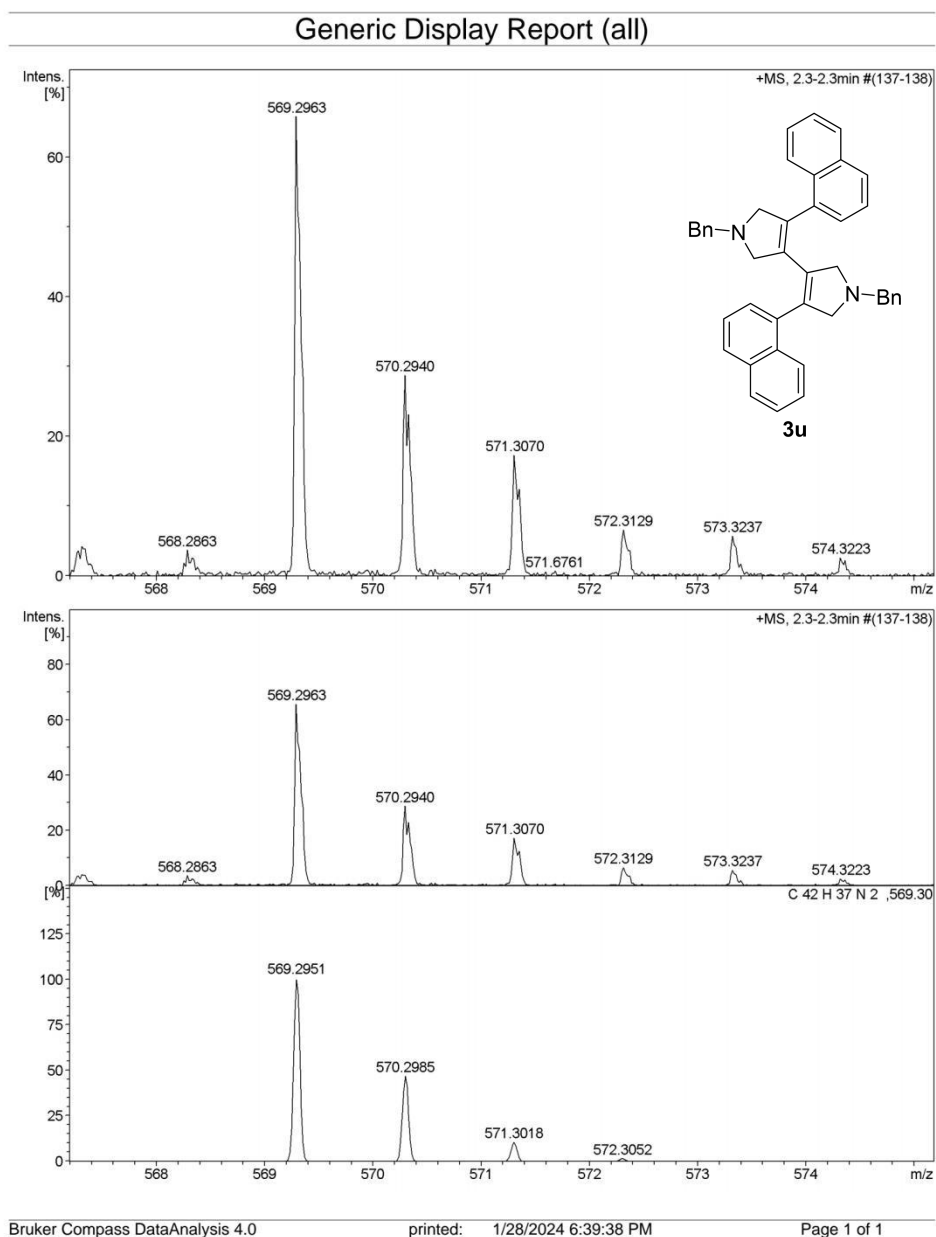

**3v. HRMS (ESI) calcd for C<sub>36</sub>H<sub>33</sub>N<sub>2</sub>O<sub>4</sub><sup>+</sup> *m/z* 557.2435 [M+H]<sup>+</sup>, Found 557.2426.**

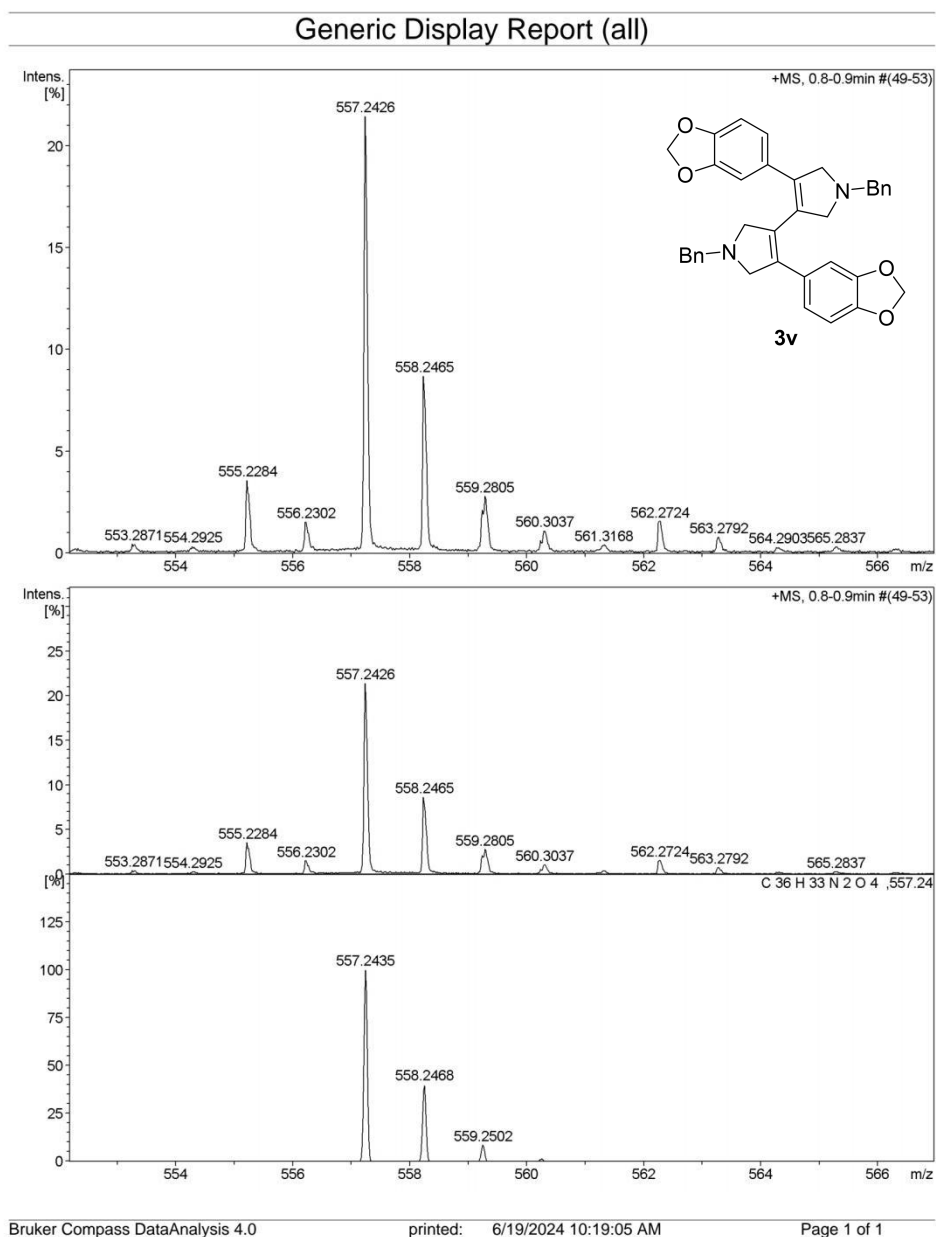



**3w. HRMS (ESI) calcd for C<sub>30</sub>H<sub>29</sub>N<sub>2</sub>S<sub>2</sub><sup>+</sup> *m/z* 481.1767 [M+H]<sup>+</sup>, Found 481.1765.**

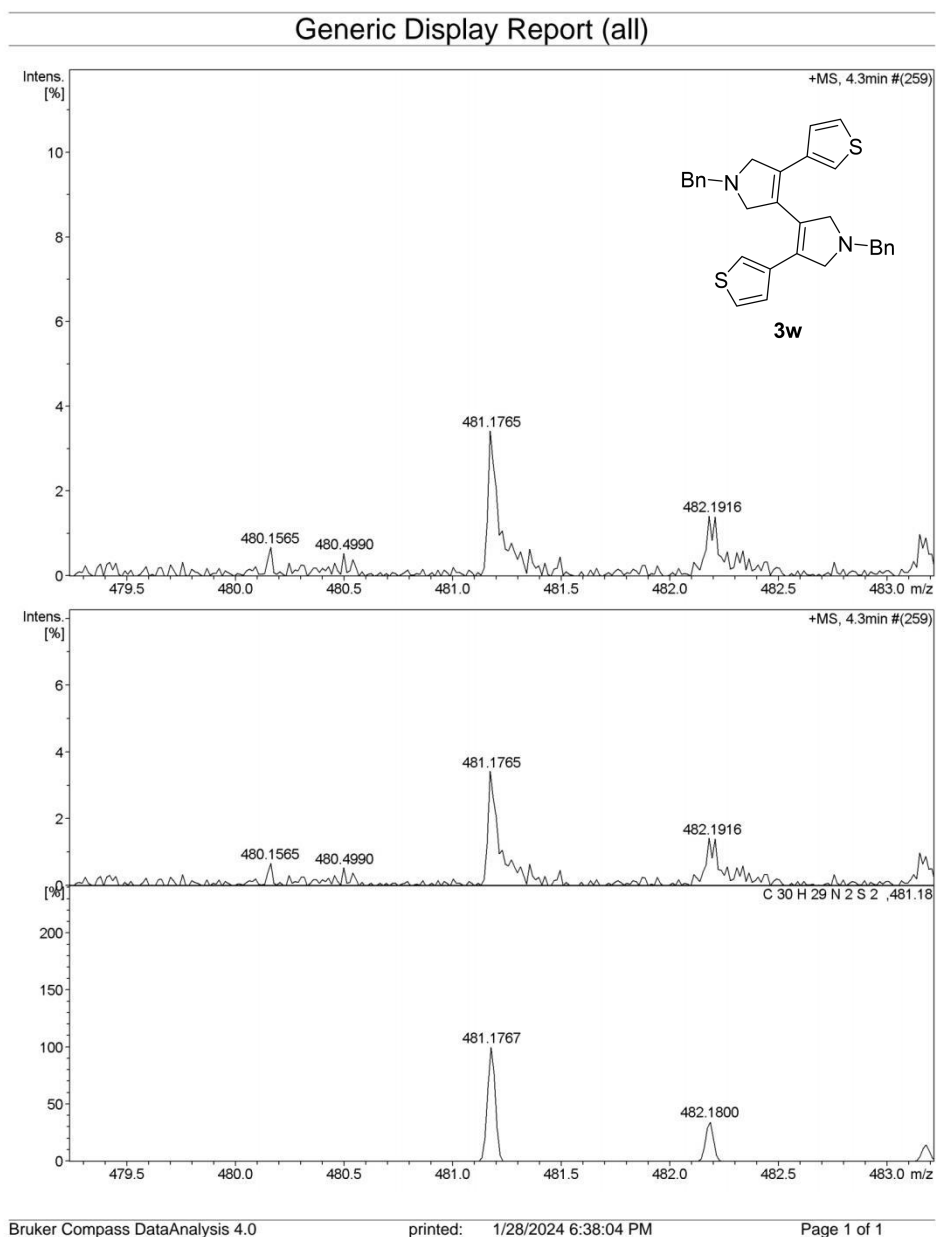

**3x.** HRMS (ESI) calcd for  $C_{35}H_{35}N_2^+$   $m/z$  483.2795  $[M+H]^+$ , Found 483.2788.

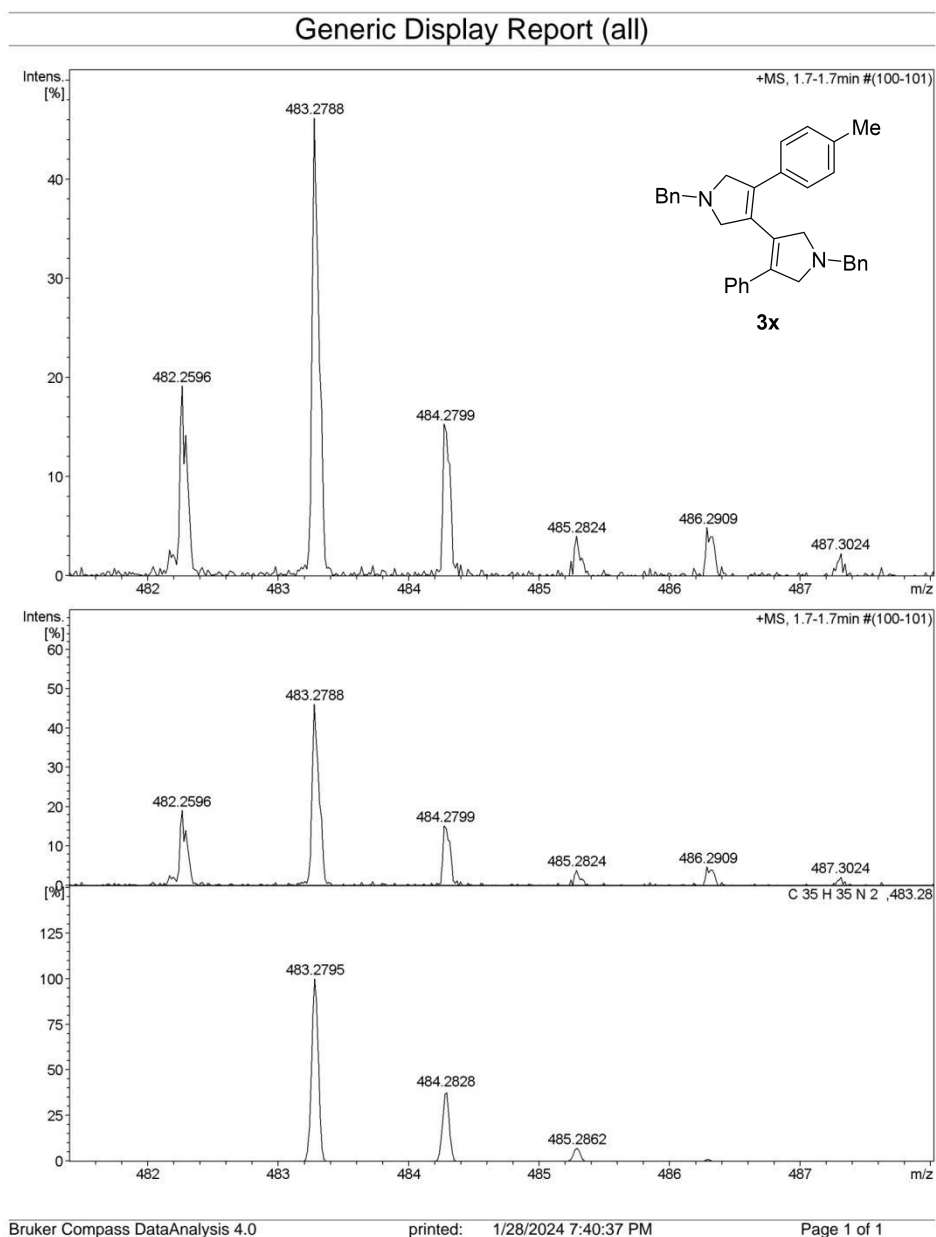

**3y.** HRMS (ESI) calcd for  $C_{39}H_{43}N_2^+$   $m/z$  539.3421  $[M+H]^+$ , Found 539.3430.

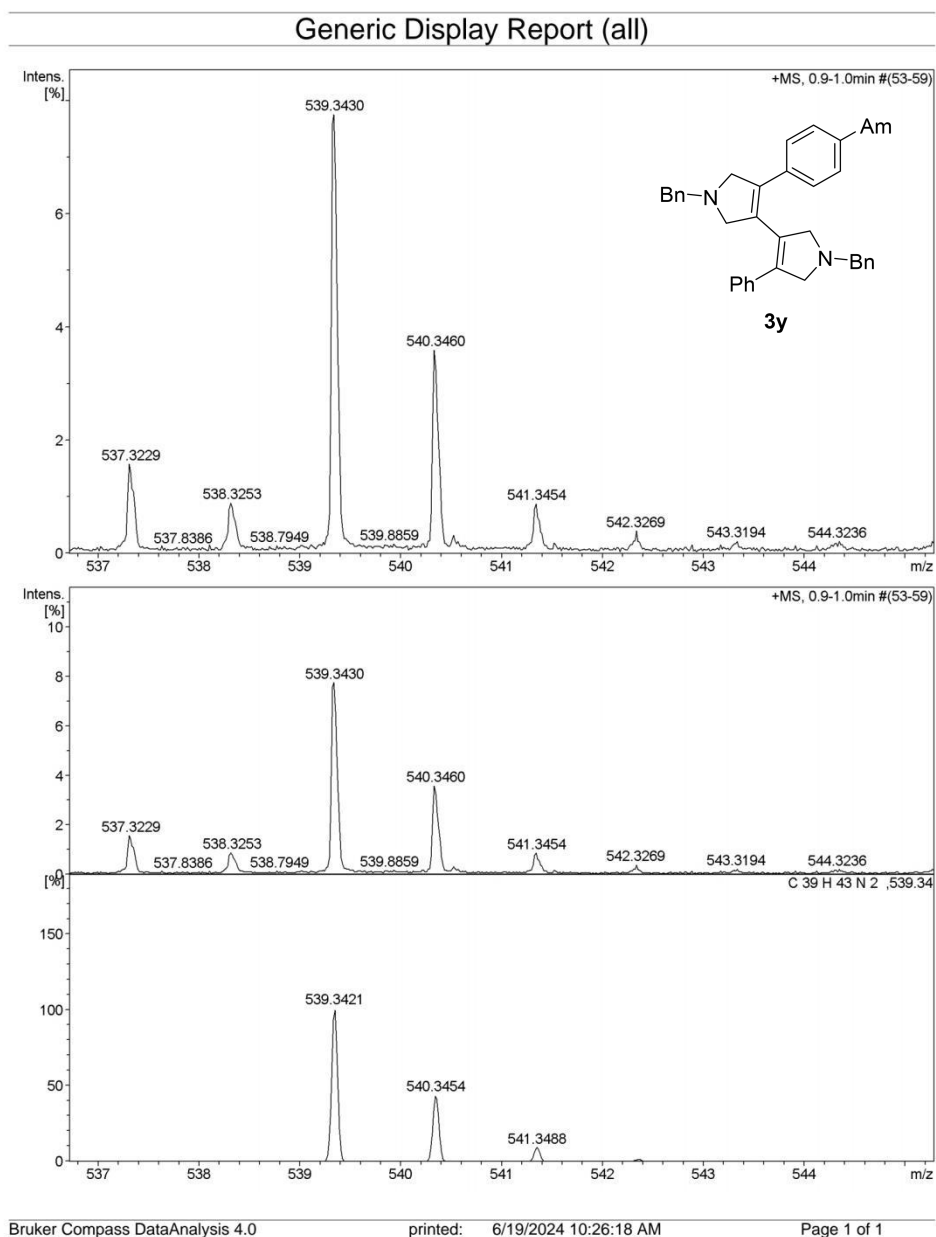

**3z.** HRMS (ESI) calcd for  $C_{34}H_{32}FN_2^+$   $m/z$  487.2544  $[M+H]^+$ , Found 487.2533.

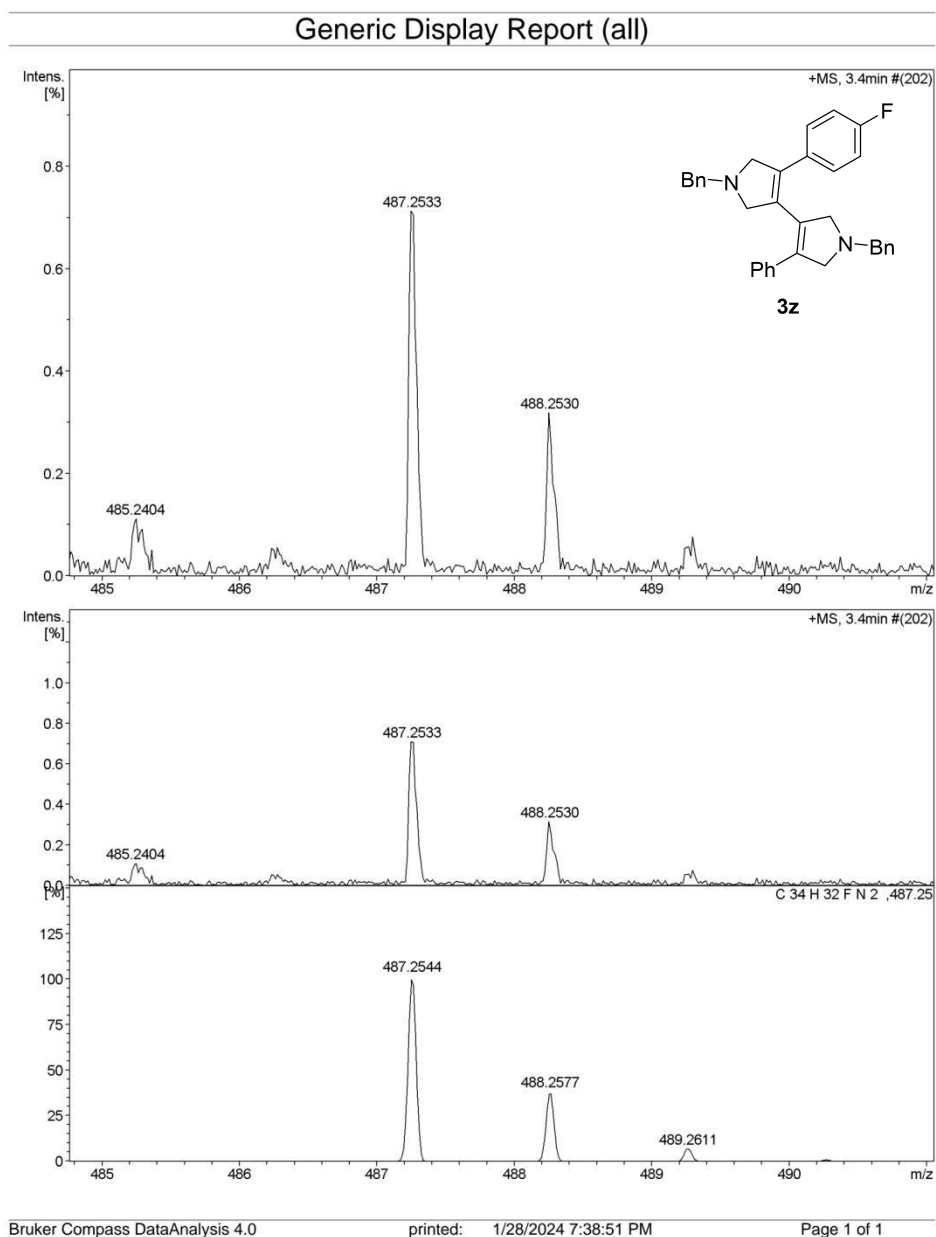

**3aa.** HRMS (ESI) calcd for  $C_{35}H_{35}N_2O^+$   $m/z$  499.2744  $[M+H]^+$ , Found 499.2753.

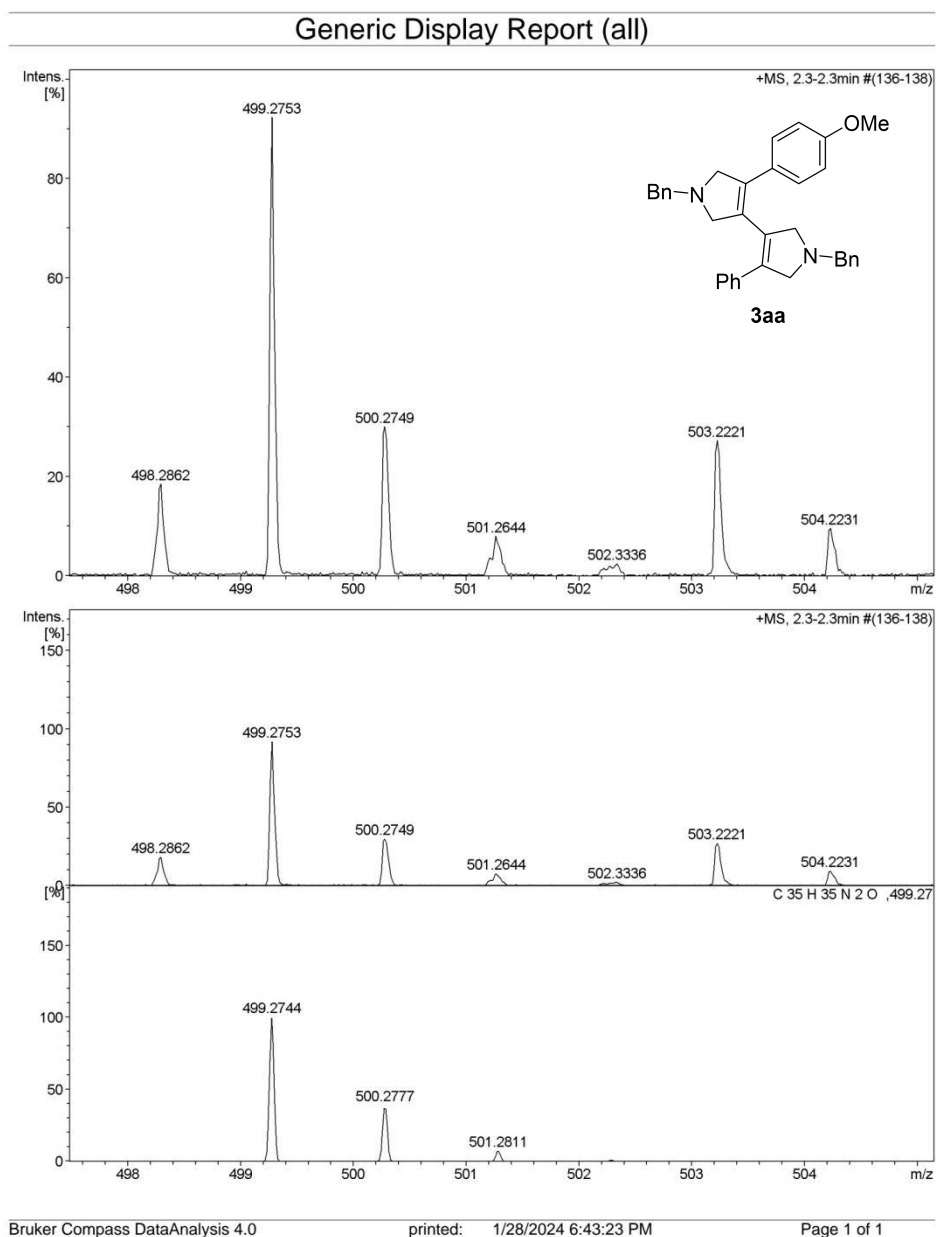

**3ab.** HRMS (ESI) calcd for  $C_{34}H_{32}ClN_2^+$   $m/z$  503.2249  $[M+H]^+$ , Found 503.2239.

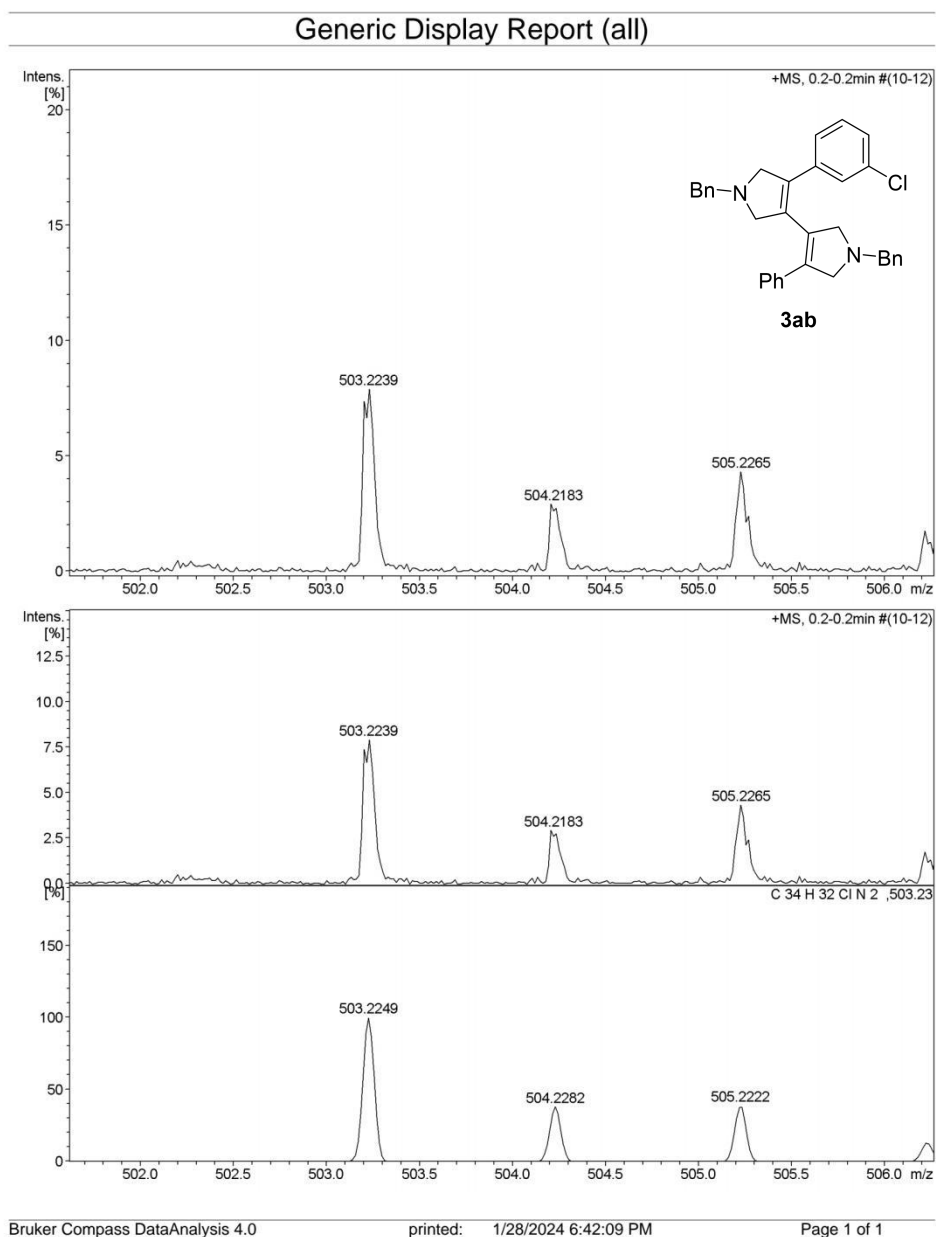

**3ac.** HRMS (ESI) calcd for  $C_{34}H_{32}FN_2^+$   $m/z$  487.2544  $[M+H]^+$ , Found 487.2543.

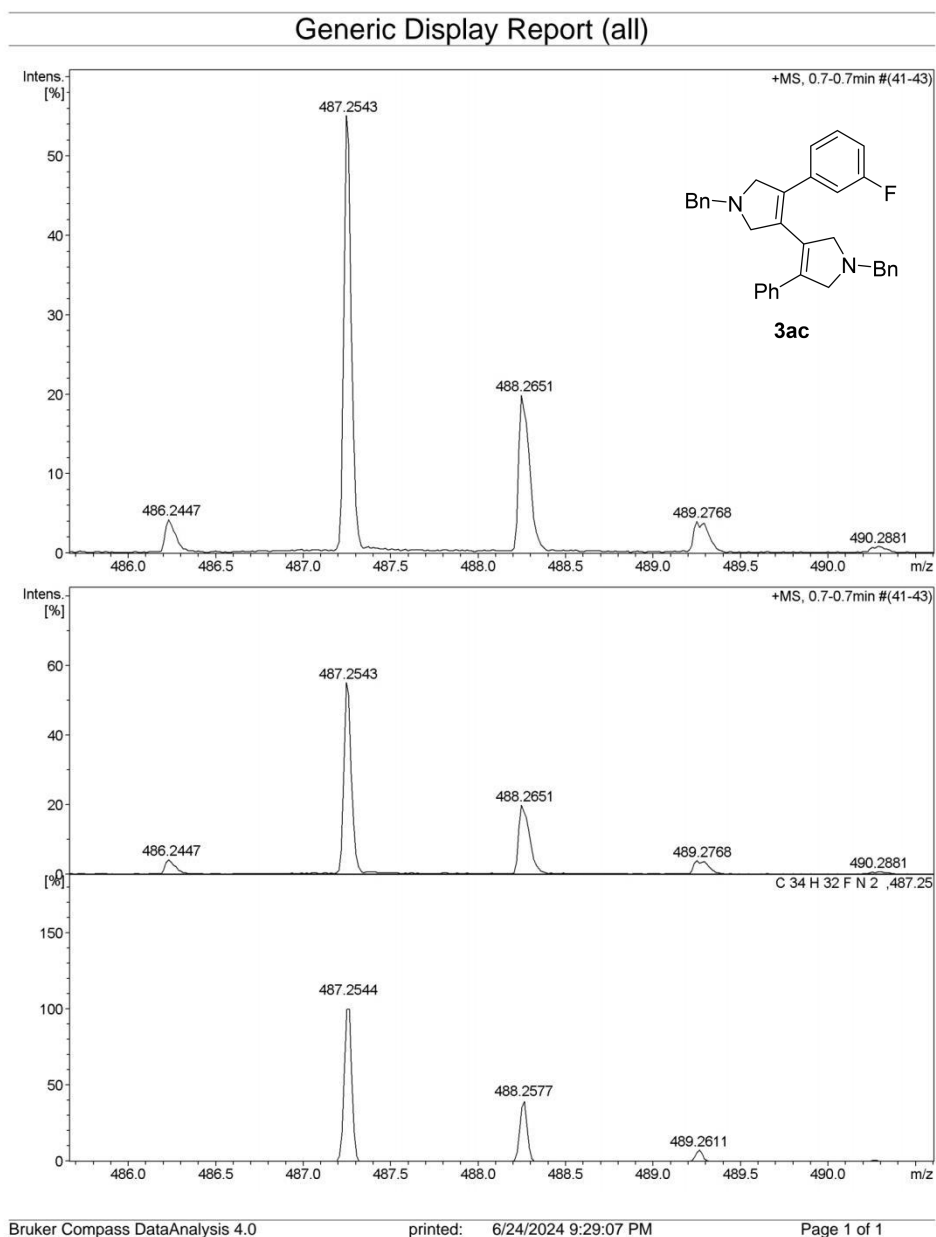

**3ad. HRMS (ESI) calcd for  $C_{34}H_{32}BrN_2^+$   $m/z$  547.1743  $[M+H]^+$ , Found 547.1740.**

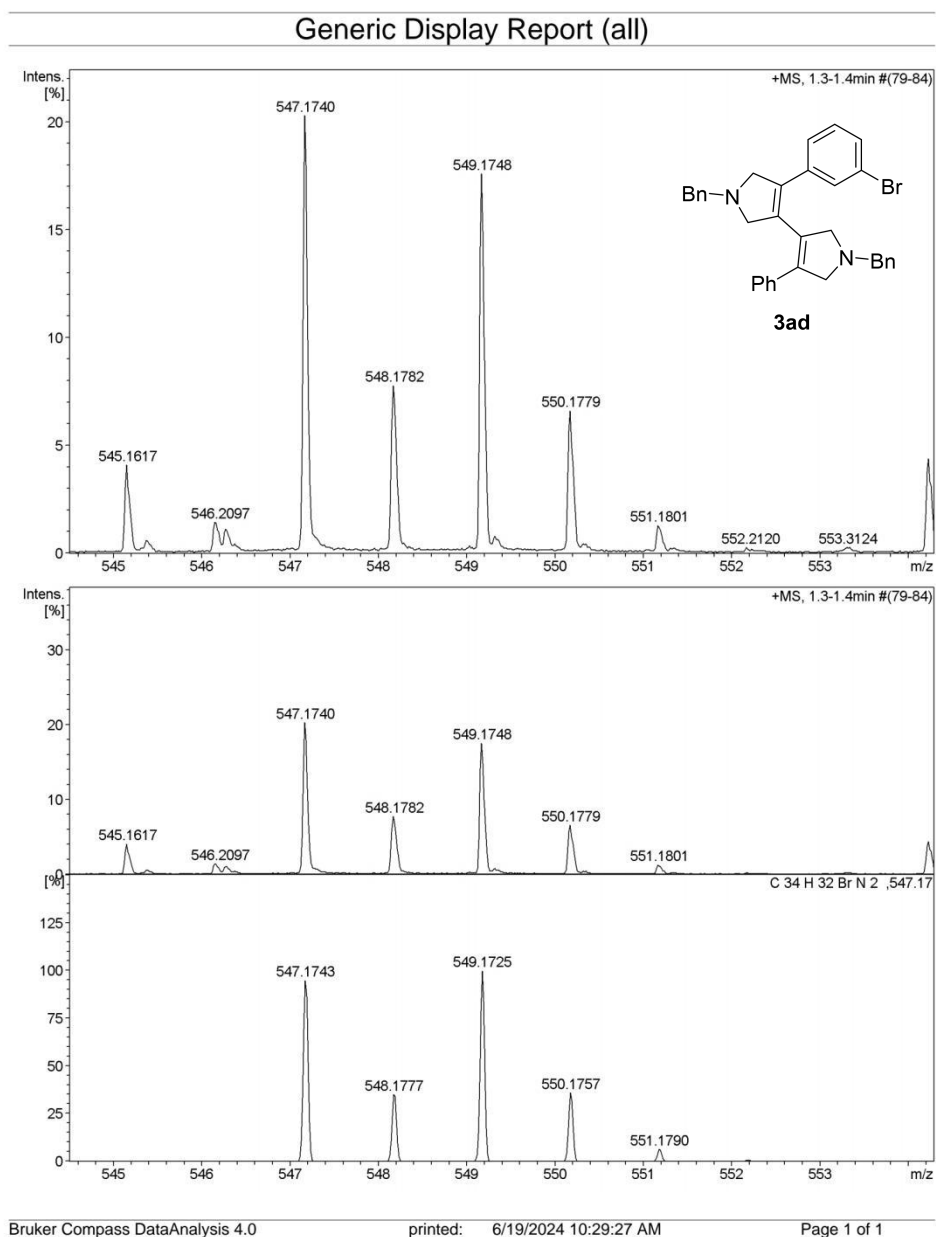



**3ae.** HRMS (ESI) calcd for  $C_{32}H_{31}N_2S^+$   $m/z$  475.2202  $[M+H]^+$ , Found 475.2199.

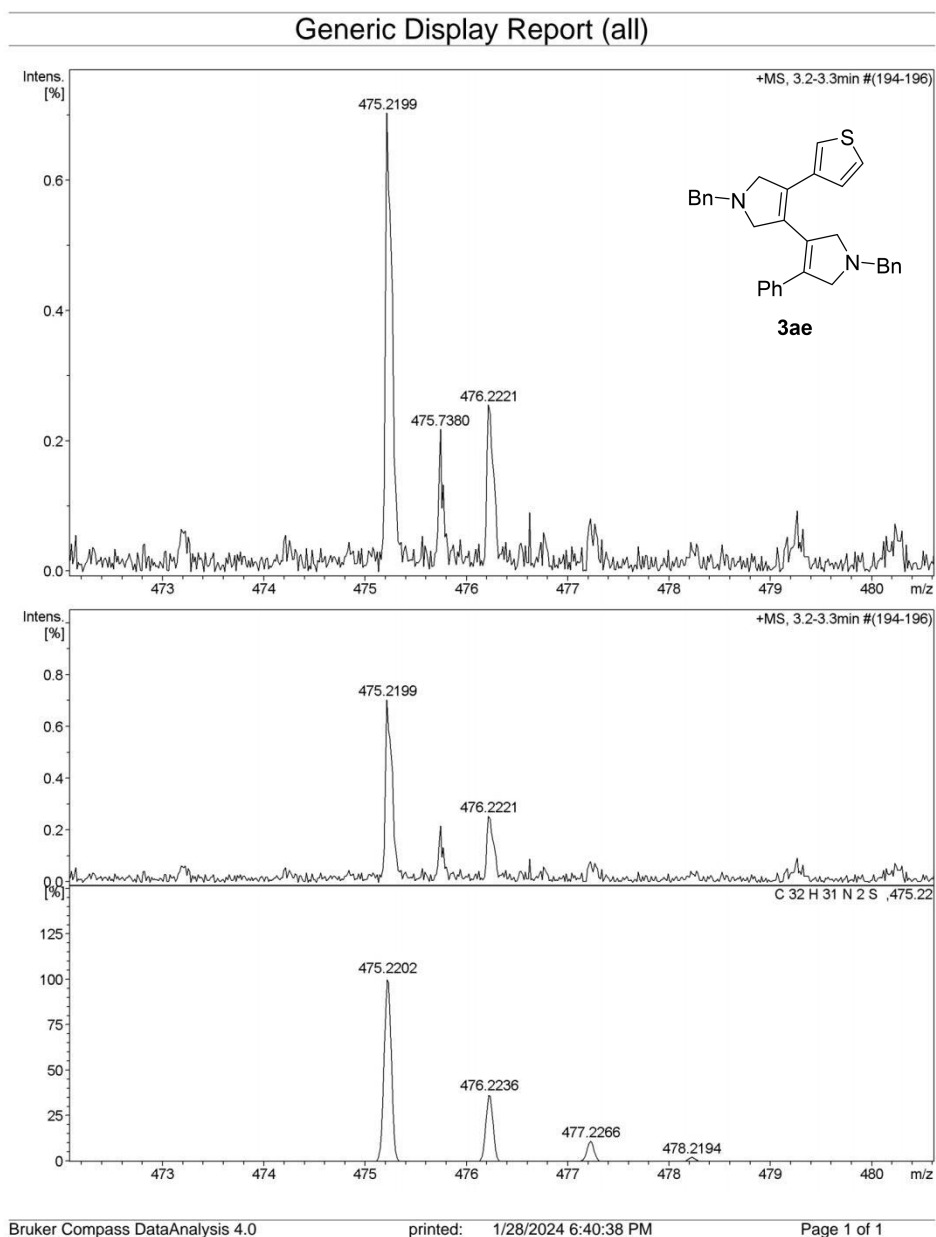

**3af.** HRMS (ESI) calcd for C<sub>34</sub>H<sub>39</sub>N<sub>2</sub><sup>+</sup> *m/z* 475.3113 [M+H]<sup>+</sup>, Found 475.3115.

# Elemental Composition Report

Page 1

## Single Mass Analysis

Tolerance = 5.0 mDa / DBE: min = -1.5, max = 50.0

Element prediction: Off

Number of isotope peaks used for i-FIT = 3

Monoisotopic Mass, Even Electron Ions

3220 formula(e) evaluated with 1 results within limits (up to 50 closest results for each mass)

Elements Used:

C: 34-34 H: 39-39 N: 0-30 O: 0-100 Na: 0-8

32

241102-2-T-461-1 10 (0.089)

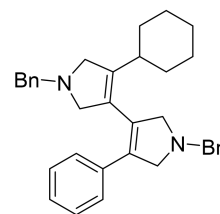

**3af**

1: TOF MS ES+  
4.11e+006

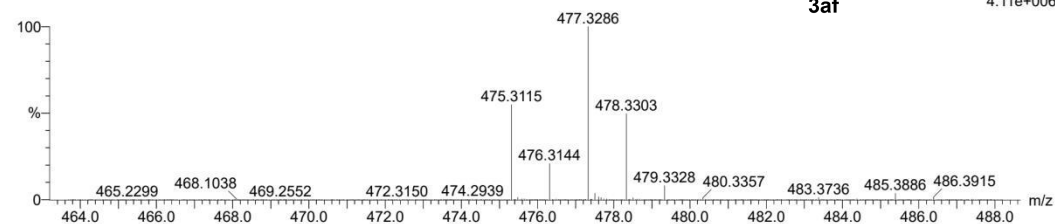

Minimum: -1.5  
Maximum: 5.0 10.0 50.0

| Mass     | Calc. Mass | mDa | PPM | DBE  | i-FIT | Norm | Conf(%) | Formula                                        |
|----------|------------|-----|-----|------|-------|------|---------|------------------------------------------------|
| 475.3115 | 475.3113   | 0.2 | 0.4 | 16.5 | 974.3 | n/a  | n/a     | C <sub>34</sub> H <sub>39</sub> N <sub>2</sub> |

**3ag.** HRMS (ESI) calcd for C<sub>34</sub>H<sub>41</sub>N<sub>2</sub><sup>+</sup> *m/z* 477.3264 [M+H]<sup>+</sup>, Found 477.3251.

#### Elemental Composition Report

##### Single Mass Analysis

Tolerance = 5.0 mDa / DBE: min = -1.5, max = 50.0

Element prediction: Off

Number of isotope peaks used for i-FIT = 3

Monoisotopic Mass, Even Electron Ions

3220 formula(e) evaluated with 1 results within limits (up to 50 closest results for each mass)

Elements Used:

C: 34-34 H: 39-39 N: 0-30 O: 0-100 Na: 0-8

32

241102-2-T-461-2 60 (0.371)

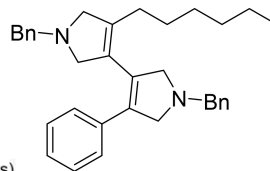

Page 1

**3ag**

1: TOF MS ES+  
1.41e+005

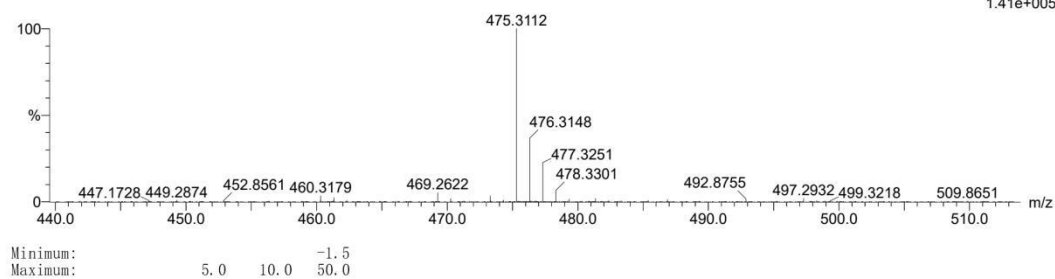

**3ah.** HRMS (ESI) calcd for C<sub>31</sub>H<sub>37</sub>N<sub>2</sub>Si<sup>+</sup> *m/z* 465.2726 [M+H]<sup>+</sup>, Found 465.2730.

#### Elemental Composition Report

##### Single Mass Analysis

Tolerance = 5.0 mDa / DBE: min = -1.5, max = 50.0

Element prediction: Off

Number of isotope peaks used for i-FIT = 3

Monoisotopic Mass, Even Electron Ions

441 formula(e) evaluated with 1 results within limits (up to 50 best isotopic matches for each mass)

Elements Used:

C: 31-31 H: 37-37 N: 0-100 O: 0-100 Si: 1-1

31

250103-3-T-494-1 257 (0.566)

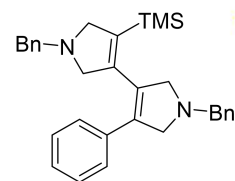

Page 1

**3ah**

1: TOF MS ES+  
2.47e+005

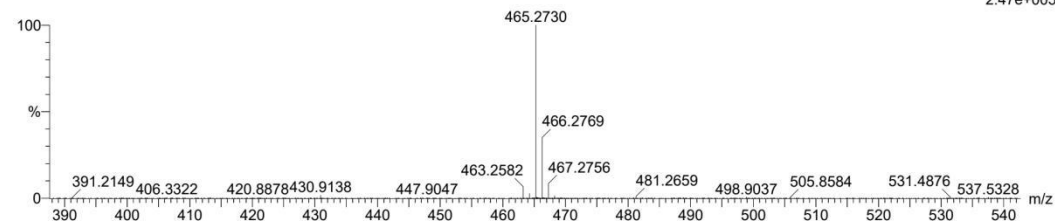

Minimum: -1.5  
Maximum: 50.0

| Mass     | Calc. Mass | mDa | PPM | DBE  | i-FIT | Norm | Conf(%) | Formula                                           |
|----------|------------|-----|-----|------|-------|------|---------|---------------------------------------------------|
| 465.2730 | 465.2726   | 0.4 | 0.9 | 15.5 | 461.7 | n/a  | n/a     | C <sub>31</sub> H <sub>37</sub> N <sub>2</sub> Si |

**3ai.** HRMS (ESI) calcd for C<sub>34</sub>H<sub>44</sub>N<sub>2</sub>Na<sup>+</sup> *m/z* 503.3397 [M+H]<sup>+</sup>, Found 503.3389.

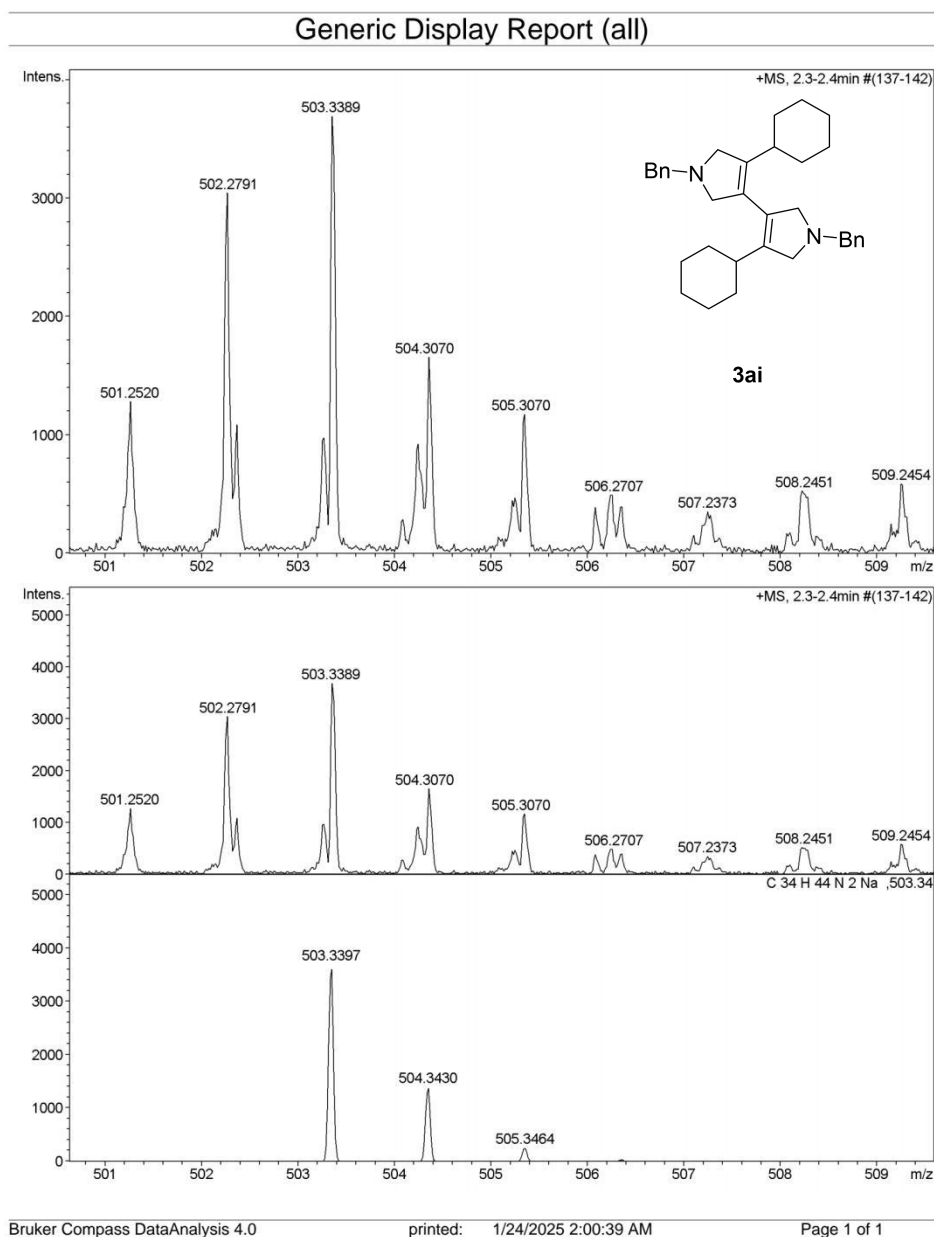

**4a.** HRMS (ESI) calcd for C<sub>34</sub>H<sub>29</sub>N<sub>2</sub><sup>+</sup> *m/z* 465.2331 [M+H]<sup>+</sup>, Found 465.2322.

#### Elemental Composition Report

Page 1

#### Single Mass Analysis

Tolerance = 5.0 mDa / DBE: min = -1.5, max = 50.0

Element prediction: Off

Number of isotope peaks used for i-FIT = 3

Monoisotopic Mass, Even Electron Ions

3074 formula(e) evaluated with 1 results within limits (up to 50 closest results for each mass)

Elements Used:

C: 34-34 H: 29-29 N: 0-30 O: 0-100 Na: 0-8

32

241102-2-T-472 20 (0.142)

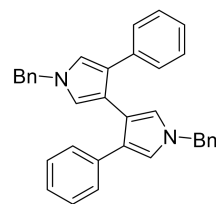

**4a**

1: TOF MS ES+  
5.47e+005

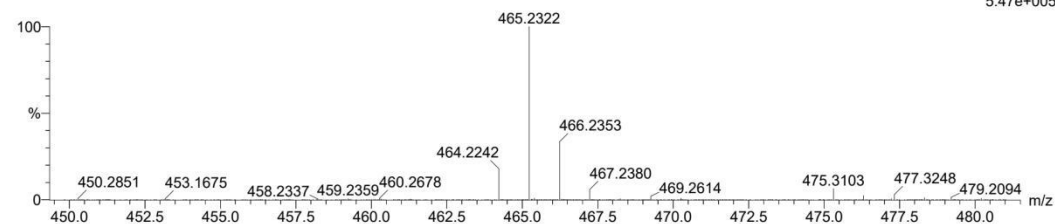

Minimum:  
Maximum:

| Mass     | Calc. Mass | mDa  | PPM  | DBE  | i-FIT | Norm | Conf(%) | Formula                                        |
|----------|------------|------|------|------|-------|------|---------|------------------------------------------------|
| 465.2322 | 465.2331   | -0.9 | -1.9 | 21.5 | 726.5 | n/a  | n/a     | C <sub>34</sub> H <sub>29</sub> N <sub>2</sub> |

**4b.** HRMS (ESI) calcd for  $C_{38}H_{37}N_2^+$   $m/z$  521.2957  $[M+H]^+$ , Found 521.2950.

#### Elemental Composition Report

##### Single Mass Analysis

Tolerance = 5.0 mDa / DBE: min = -1.5, max = 50.0

Element prediction: Off

Number of isotope peaks used for i-FIT = 3

Monoisotopic Mass, Even Electron Ions

3962 formula(e) evaluated with 1 results within limits (up to 50 closest results for each mass)

Elements Used:

C: 38-38 H: 37-37 N: 0-30 O: 0-100 Na: 0-8

32

241102-2-T-233-6 24 (0.162)

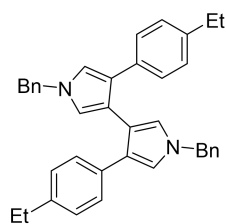

Page 1

**4b**

1: TOF MS ES+  
1.32e+006

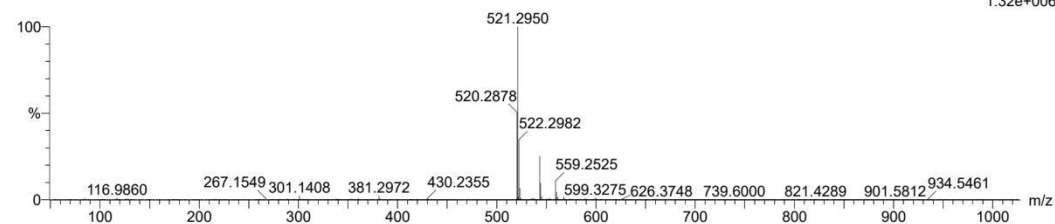

Minimum: -1.5  
Maximum: 5.0 10.0 50.0

| Mass     | Calc. Mass | mDa  | PPM  | DBE  | i-FIT | Norm | Conf (%) | Formula                                        |
|----------|------------|------|------|------|-------|------|----------|------------------------------------------------|
| 521.2950 | 521.2957   | -0.7 | -1.3 | 21.5 | 796.6 | n/a  | n/a      | C <sub>38</sub> H <sub>37</sub> N <sub>2</sub> |

**4c.** HRMS (ESI) calcd for C<sub>42</sub>H<sub>45</sub>N<sub>2</sub><sup>+</sup> *m/z* 577.3583 [M+H]<sup>+</sup>, Found 577.3580.

#### Elemental Composition Report

Page 1

#### Single Mass Analysis

Tolerance = 5.0 mDa / DBE: min = -1.5, max = 50.0

Element prediction: Off

Number of isotope peaks used for i-FIT = 3

Monoisotopic Mass, Even Electron Ions

4907 formula(e) evaluated with 1 results within limits (up to 50 closest results for each mass)

Elements Used:

C: 42-42 H: 45-45 N: 0-30 O: 0-100 Na: 0-8

32

241102-2-T-415-3 35 (0.240)

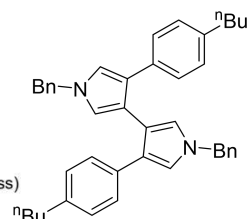

**4c**

1: TOF MS ES+  
1.87e+006

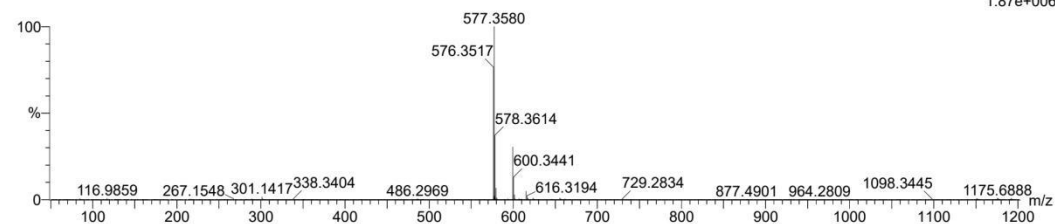

Minimum:  
Maximum:

|          |            |      |      |      |       |      |         |            |
|----------|------------|------|------|------|-------|------|---------|------------|
| Mass     | Calc. Mass | mDa  | PPM  | DBE  | i-FIT | Norm | Conf(%) | Formula    |
| 577.3580 | 577.3583   | -0.3 | -0.5 | 21.5 | 739.1 | n/a  | n/a     | C42 H45 N2 |



**4d.** HRMS (ESI) calcd for C<sub>44</sub>H<sub>49</sub>N<sub>2</sub><sup>+</sup> *m/z* 605.3896 [M+H]<sup>+</sup>, Found 605.3898.

#### Elemental Composition Report

##### Single Mass Analysis

Tolerance = 5.0 mDa / DBE: min = -1.5, max = 50.0

Element prediction: Off

Number of isotope peaks used for i-FIT = 3

Monoisotopic Mass, Even Electron Ions

5390 formula(e) evaluated with 1 results within limits (up to 50 closest results for each mass)

Elements Used:

C: 44-44 H: 49-49 N: 0-30 O: 0-100 Na: 0-8

32

241102-2-T-415-4 57 (0.355)

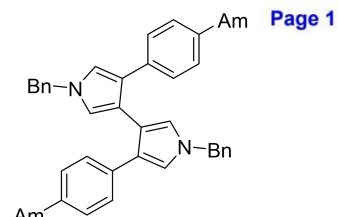

**4d**

1: TOF MS ES+  
1.56e+006

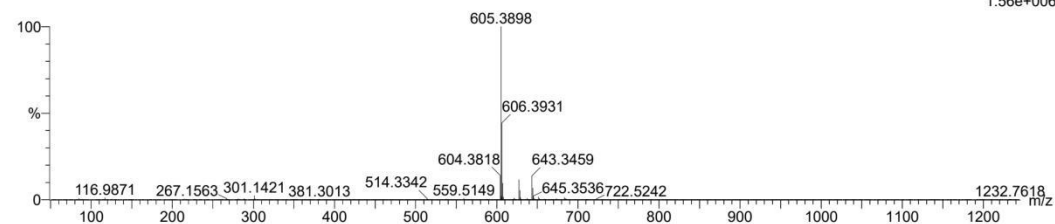

Minimum: -1.5  
Maximum: 5.0 10.0 50.0

| Mass     | Calc. Mass | mDa | PPM | DBE  | i-FIT | Norm | Conf(%) | Formula                                        |
|----------|------------|-----|-----|------|-------|------|---------|------------------------------------------------|
| 605.3898 | 605.3896   | 0.2 | 0.3 | 21.5 | 761.6 | n/a  | n/a     | C <sub>44</sub> H <sub>49</sub> N <sub>2</sub> |

**4e.** HRMS (ESI) calcd for  $C_{34}H_{27}N_2F_2^+$   $m/z$  501.2142  $[M+H]^+$ , Found 501.2133.

#### Elemental Composition Report

##### Single Mass Analysis

Tolerance = 5.0 mDa / DBE: min = -1.5, max = 50.0

Element prediction: Off

Number of isotope peaks used for i-FIT = 3

Monoisotopic Mass, Even Electron Ions

9139 formula(e) evaluated with 1 results within limits (up to 50 closest results for each mass)

Elements Used:

C: 34-34 H: 27-27 N: 0-30 O: 0-100 Na: 0-8 F: 1-3

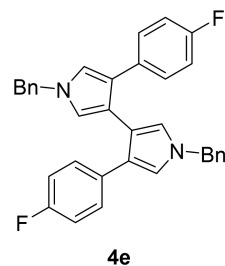

Page 1

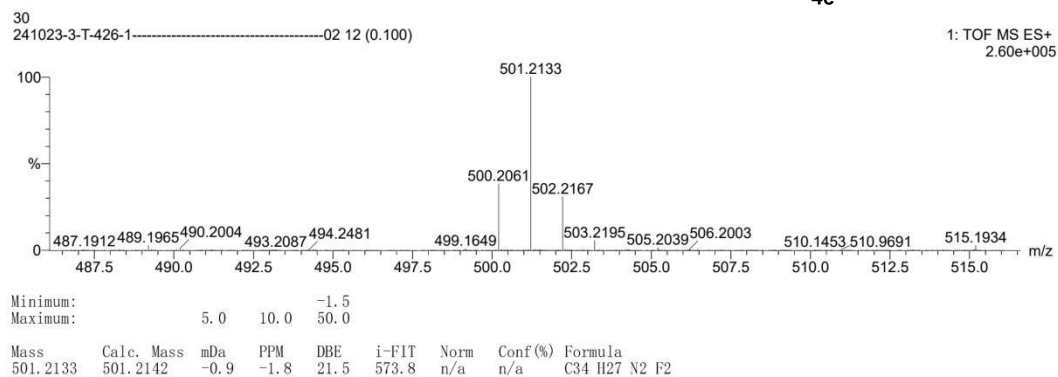

**4f. HRMS (ESI) calcd for C<sub>36</sub>H<sub>33</sub>N<sub>2</sub>O<sub>2</sub><sup>+</sup> *m/z* 525.2542 [M+H]<sup>+</sup>, Found 525.2538.**

#### Elemental Composition Report

##### Single Mass Analysis

Tolerance = 5.0 mDa / DBE: min = -1.5, max = 50.0

Element prediction: Off

Number of isotope peaks used for i-FIT = 3

Monoisotopic Mass, Even Electron Ions

3997 formula(e) evaluated with 1 results within limits (up to 50 closest results for each mass)

Elements Used:

C: 36-36 H: 33-33 N: 0-30 O: 0-100 Na: 0-8

32

241102-2-T-467-1 31 (0.219)

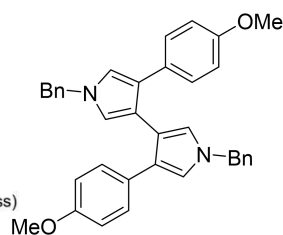

**4f**

1: TOF MS ES+  
7.58e+004

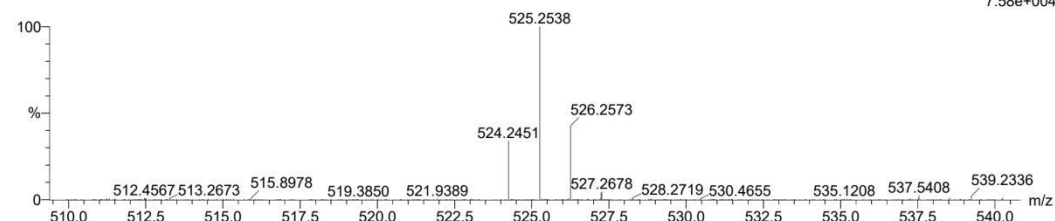

Minimum: -1.5  
Maximum: 5.0 10.0 50.0

| Mass     | Calc. Mass | mDa  | PPM  | DBE  | i-FIT | Norm | Conf(%) | Formula                                                       |
|----------|------------|------|------|------|-------|------|---------|---------------------------------------------------------------|
| 525.2538 | 525.2542   | -0.4 | -0.8 | 21.5 | 466.5 | n/a  | n/a     | C <sub>36</sub> H <sub>33</sub> N <sub>2</sub> O <sub>2</sub> |

**4g.** HRMS (ESI) calcd for  $C_{46}H_{37}N_2^+$   $m/z$  617.2957  $[M+H]^+$ , Found 617.2952.

#### Elemental Composition Report

##### Single Mass Analysis

Tolerance = 5.0 mDa / DBE: min = -1.5, max = 50.0

Element prediction: Off

Number of isotope peaks used for i-FIT = 3

Monoisotopic Mass, Even Electron Ions

5611 formula(e) evaluated with 1 results within limits (up to 50 closest results for each mass)

Elements Used:

C: 46-46 H: 37-37 N: 0-30 O: 0-100 Na: 0-8

30

241023-3-T-446-1-----02.85 (0.522)

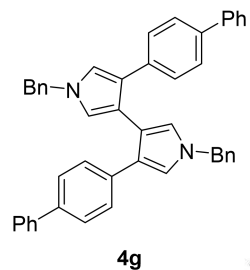

Page 1

1: TOF MS ES+  
1.80e+004

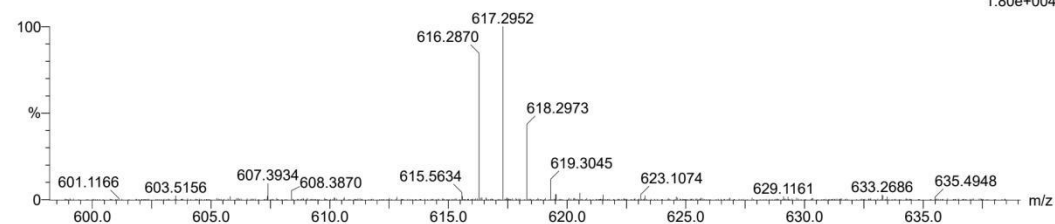

Minimum: -1.5  
Maximum: 5.0 10.0 50.0

| Mass     | Calc. Mass | mDa  | PPM  | DBE  | i-FIT | Norm | Conf (%) | Formula                                        |
|----------|------------|------|------|------|-------|------|----------|------------------------------------------------|
| 617.2952 | 617.2957   | -0.5 | -0.8 | 29.5 | 290.6 | n/a  | n/a      | C <sub>46</sub> H <sub>37</sub> N <sub>2</sub> |

**4h. HRMS (ESI) calcd for C<sub>36</sub>H<sub>33</sub>N<sub>2</sub><sup>+</sup> *m/z* 493.2644 [M+H]<sup>+</sup>, Found 493.2635.**

#### Elemental Composition Report

##### Single Mass Analysis

Tolerance = 5.0 mDa / DBE: min = -1.5, max = 50.0

Element prediction: Off

Number of isotope peaks used for i-FIT = 3

Monoisotopic Mass, Even Electron Ions

3510 formula(e) evaluated with 1 results within limits (up to 50 closest results for each mass)

Elements Used:

C: 36-36 H: 33-33 N: 0-30 O: 0-100 Na: 0-8

32

241102-2-T-467-2 20 (0.142)

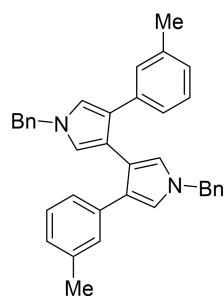

Page 1

1: TOF MS ES+  
1.24e+006

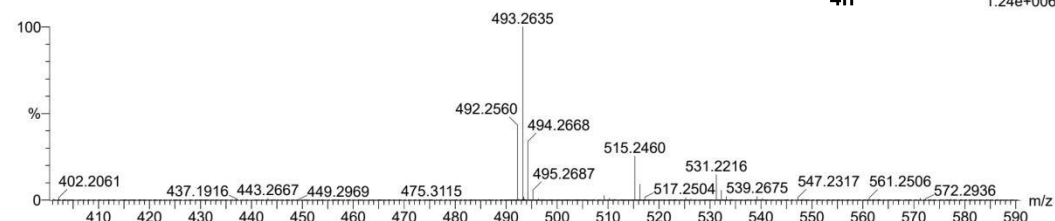

Minimum: -1.5  
Maximum: 5.0 10.0 50.0

| Mass     | Calc. Mass | mDa  | PPM  | DBE  | i-FIT | Norm | Conf (%) | Formula                                        |
|----------|------------|------|------|------|-------|------|----------|------------------------------------------------|
| 493.2635 | 493.2644   | -0.9 | -1.8 | 21.5 | 722.2 | n/a  | n/a      | C <sub>36</sub> H <sub>33</sub> N <sub>2</sub> |

**4i. HRMS (ESI) calcd for C<sub>34</sub>H<sub>27</sub>F<sub>2</sub>N<sub>2</sub><sup>+</sup> *m/z* 501.2142 [M+H]<sup>+</sup>, Found 501.2134.**

#### Elemental Composition Report

##### Single Mass Analysis

Tolerance = 5.0 mDa / DBE: min = -1.5, max = 50.0

Element prediction: Off

Number of isotope peaks used for i-FIT = 3

Monoisotopic Mass, Even Electron Ions

9139 formula(e) evaluated with 1 results within limits (up to 50 closest results for each mass)

Elements Used:

C: 34-34 H: 27-27 N: 0-30 O: 0-100 F: 1-3 Na: 0-8

30

241023-3-T-426-2-----02 12 (0.100)

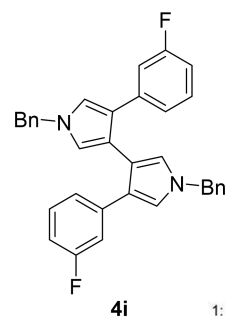

Page 1

1: TOF MS ES+  
3.53e+005

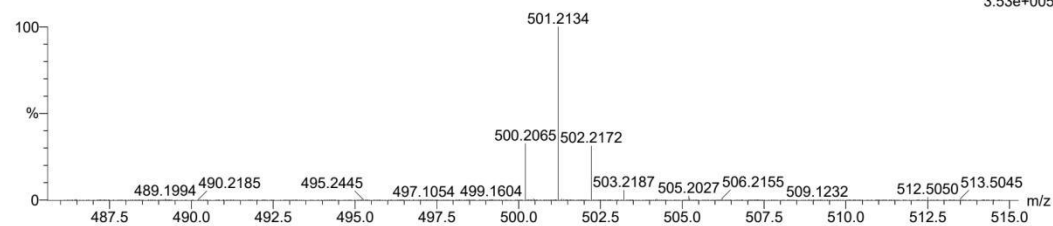

Minimum: -1.5  
Maximum: 5.0 10.0 50.0

| Mass     | Calc. Mass | mDa  | PPM  | DBE  | i-FIT | Norm | Conf (%) | Formula                                                       |
|----------|------------|------|------|------|-------|------|----------|---------------------------------------------------------------|
| 501.2134 | 501.2142   | -0.8 | -1.6 | 21.5 | 590.9 | n/a  | n/a      | C <sub>34</sub> H <sub>27</sub> N <sub>2</sub> F <sub>2</sub> |

**4j. HRMS (ESI) calcd for C<sub>34</sub>H<sub>27</sub>Cl<sub>2</sub>N<sub>2</sub><sup>+</sup> *m/z* 533.1551 [M+H]<sup>+</sup>, Found 533.1541.**

#### Elemental Composition Report

##### Single Mass Analysis

Tolerance = 5.0 mDa / DBE: min = -1.5, max = 50.0

Element prediction: Off

Number of isotope peaks used for i-FIT = 3

Monoisotopic Mass, Even Electron Ions

3045 formula(e) evaluated with 1 results within limits (up to 50 closest results for each mass)

Elements Used:

C: 34-34 H: 27-27 N: 0-30 O: 0-100 Na: 0-8 Cl: 2-2

32

241102-2-T-275-14 15 (0.115)

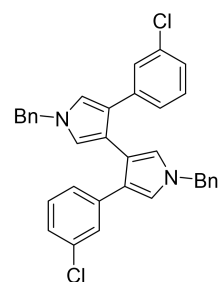

Page 1

1: TOF MS ES+  
2.35e+005

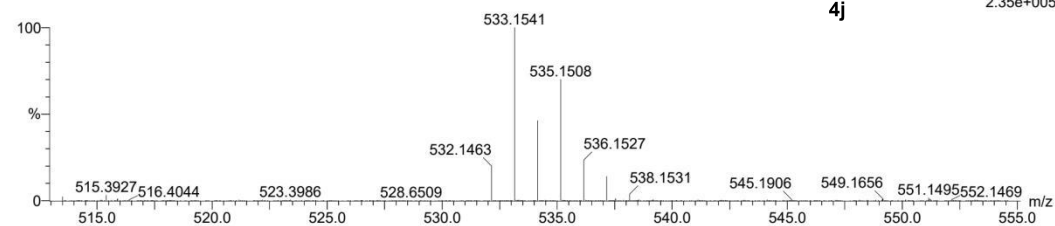

Minimum: -1.5  
Maximum: 50.0

| Mass     | Calc. Mass | mDa  | PPM  | DBE  | i-FIT | Norm | Conf (%) | Formula                                                        |
|----------|------------|------|------|------|-------|------|----------|----------------------------------------------------------------|
| 533.1541 | 533.1551   | -1.0 | -1.9 | 21.5 | 600.4 | n/a  | n/a      | C <sub>34</sub> H <sub>27</sub> N <sub>2</sub> Cl <sub>2</sub> |

**4k.** HRMS (ESI) calcd for C<sub>34</sub>H<sub>27</sub>Br<sub>2</sub>N<sub>2</sub><sup>+</sup> *m/z* 621.0541 [M+H]<sup>+</sup>, Found 621.0541.

# Elemental Composition Report

Page 1

## Single Mass Analysis

Tolerance = 5.0 mDa / DBE: min = -1.5, max = 50.0

Element prediction: Off

Number of isotope peaks used for i-FIT = 3

Monoisotopic Mass, Even Electron Ions

10336 formula(e) evaluated with 1 results within limits (up to 50 closest results for each mass)

Elements Used:

C: 34-34 H: 27-27 N: 0-30 O: 0-100 Na: 0-8 Br: 1-4

30

241023-3-T-424-----02 20 (0.142)

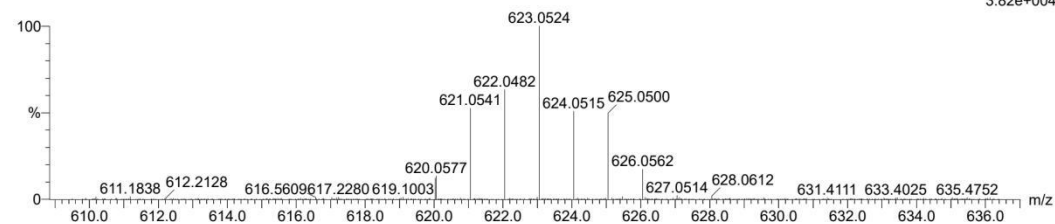

Minimum: -1.5  
Maximum: 50.0

| Mass     | Calc. Mass | mDa | PPM | DBE  | i-FIT | Norm | Conf (%) | Formula                                                        |
|----------|------------|-----|-----|------|-------|------|----------|----------------------------------------------------------------|
| 621.0541 | 621.0541   | 0.0 | 0.0 | 21.5 | 418.4 | n/a  | n/a      | C <sub>34</sub> H <sub>27</sub> N <sub>2</sub> Br <sub>2</sub> |

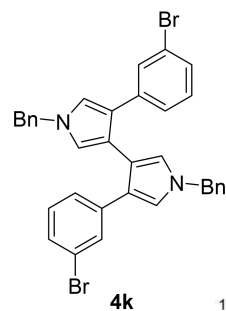

1: TOF MS ES+  
3.82e+004



**4I. HRMS (ESI) calcd for C<sub>36</sub>H<sub>33</sub>N<sub>2</sub><sup>+</sup> *m/z* 493.2644 [M+H]<sup>+</sup>, Found 493.2635.**

#### Elemental Composition Report

##### Single Mass Analysis

Tolerance = 5.0 mDa / DBE: min = -1.5, max = 50.0

Element prediction: Off

Number of isotope peaks used for i-FIT = 3

Monoisotopic Mass, Even Electron Ions

3510 formula(e) evaluated with 1 results within limits (up to 50 closest results for each mass)

Elements Used:

C: 36-36 H: 33-33 N: 0-30 O: 0-100 Na: 0-8

32

241102-2-T-275-3 24 (0.162)

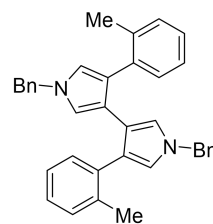

**4I**

Page 1

1: TOF MS ES+  
6.23e+005

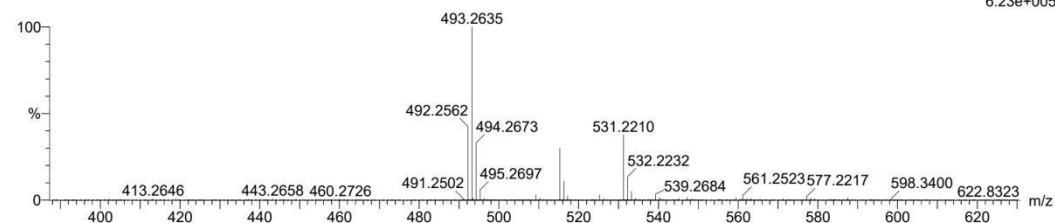

Minimum: -1.5  
Maximum: 5.0 10.0 50.0

| Mass     | Calc. Mass | mDa  | PPM  | DBE  | i-FIT | Norm | Conf (%) | Formula                                        |
|----------|------------|------|------|------|-------|------|----------|------------------------------------------------|
| 493.2635 | 493.2644   | -0.9 | -1.8 | 21.5 | 708.3 | n/a  | n/a      | C <sub>36</sub> H <sub>33</sub> N <sub>2</sub> |

**4m. HRMS (ESI) calcd for C<sub>34</sub>H<sub>27</sub>F<sub>2</sub>N<sub>2</sub><sup>+</sup> *m/z* 501.2142 [M+H]<sup>+</sup>, Found 501.2139.**

#### Elemental Composition Report

##### Single Mass Analysis

Tolerance = 5.0 mDa / DBE: min = -1.5, max = 50.0

Element prediction: Off

Number of isotope peaks used for i-FIT = 3

Monoisotopic Mass, Even Electron Ions

9139 formula(e) evaluated with 1 results within limits (up to 50 closest results for each mass)

Elements Used:

C: 34-34 H: 27-27 N: 0-30 O: 0-100 Na: 0-8 F: 1-3

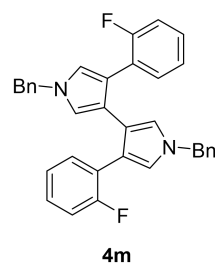

Page 1

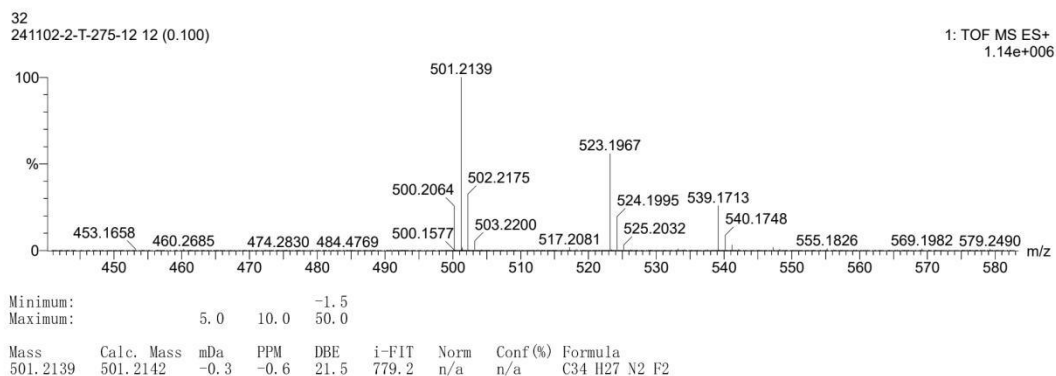

**4n.** HRMS (ESI) calcd for C<sub>34</sub>H<sub>27</sub>Cl<sub>2</sub>N<sub>2</sub><sup>+</sup> *m/z* 533.1551 [M+H]<sup>+</sup>, Found 533.1546.

#### Elemental Composition Report

##### Single Mass Analysis

Tolerance = 5.0 mDa / DBE: min = -1.5, max = 50.0

Element prediction: Off

Number of isotope peaks used for i-FIT = 3

Monoisotopic Mass, Even Electron Ions

11232 formula(e) evaluated with 1 results within limits (up to 50 closest results for each mass)

Elements Used:

C: 34-34 H: 27-27 N: 0-30 O: 0-100 Na: 0-8 Cl: 1-4

30

241023-3-T-433-1-----02 17 (0.126)

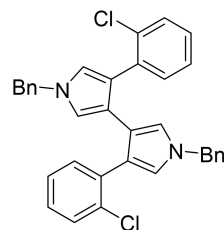

Page 1

**4n**

1: TOF MS ES+  
1.77e+005

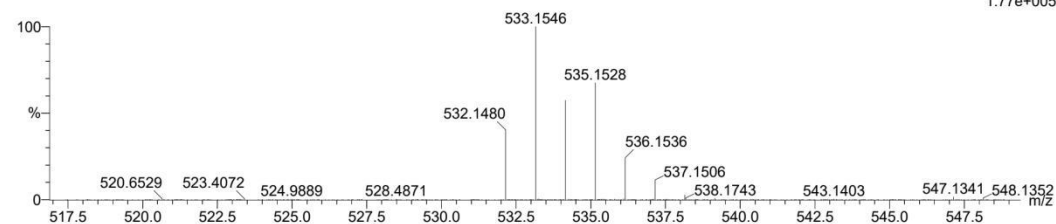

Minimum: -1.5  
Maximum: 5.0 10.0 50.0

| Mass     | Calc. Mass | mDa  | PPM  | DBE  | i-FIT | Norm | Conf(%) | Formula                                                        |
|----------|------------|------|------|------|-------|------|---------|----------------------------------------------------------------|
| 533.1546 | 533.1551   | -0.5 | -0.9 | 21.5 | 564.3 | n/a  | n/a     | C <sub>34</sub> H <sub>27</sub> N <sub>2</sub> Cl <sub>2</sub> |

**4o.** HRMS (ESI) calcd for C<sub>34</sub>H<sub>27</sub>Br<sub>2</sub>N<sub>2</sub><sup>+</sup> *m/z* 621.0541 [M+H]<sup>+</sup>, Found 621.0545.

#### Elemental Composition Report

##### Single Mass Analysis

Tolerance = 5.0 mDa / DBE: min = -1.5, max = 50.0

Element prediction: Off

Number of isotope peaks used for i-FIT = 3

Monoisotopic Mass, Even Electron Ions

10336 formula(e) evaluated with 1 results within limits (up to 50 closest results for each mass)

Elements Used:

C: 34-34 H: 27-27 N: 0-30 O: 0-100 Na: 0-8 Br: 1-4

30

241023-3-T-457-----02 40 (0.266)

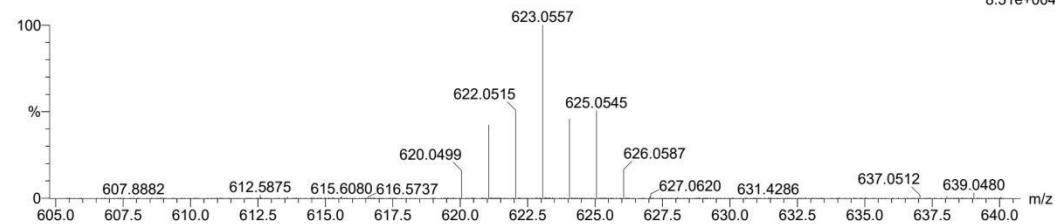

Minimum:

Maximum:

| Mass     | Calc. Mass | mDa | PPM | DBE  | i-FIT | Norm | Conf(%) | Formula                                                        |
|----------|------------|-----|-----|------|-------|------|---------|----------------------------------------------------------------|
| 621.0545 | 621.0541   | 0.4 | 0.6 | 21.5 | 397.6 | n/a  | n/a     | C <sub>34</sub> H <sub>27</sub> N <sub>2</sub> Br <sub>2</sub> |

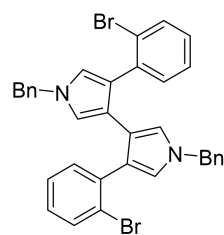

Page 1

**4o**

**4p.** HRMS (ESI) calcd for C<sub>30</sub>H<sub>25</sub>S<sub>2</sub>N<sub>2</sub><sup>+</sup> *m/z* 477.1459 [M+H]<sup>+</sup>, Found 477.1452.

#### Elemental Composition Report

##### Single Mass Analysis

Tolerance = 5.0 mDa / DBE: min = -1.5, max = 50.0

Element prediction: Off

Number of isotope peaks used for i-FIT = 3

Monoisotopic Mass, Even Electron Ions

5073 formula(e) evaluated with 1 results within limits (up to 50 closest results for each mass)

Elements Used:

C: 30-30 H: 25-25 N: 0-30 O: 0-100 Na: 0-8 S: 1-2

30

241023-3-T-446-3-----02.32 (0.224)

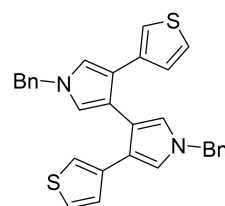

**4p**

Page 1

1: TOF MS ES+  
1.74e+005

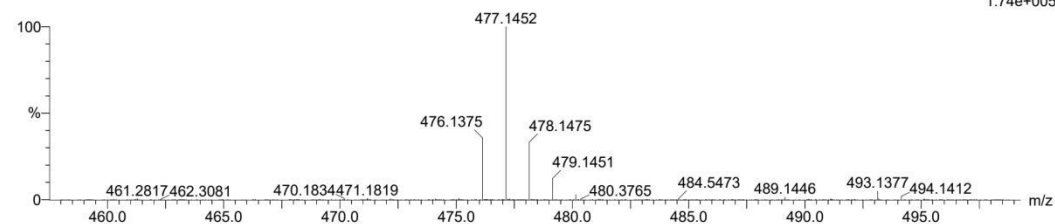

Minimum: -1.5  
Maximum: 5.0 10.0 50.0

| Mass     | Calc. Mass | mDa  | PPM  | DBE  | i-FIT | Norm | Conf (%) | Formula                                                       |
|----------|------------|------|------|------|-------|------|----------|---------------------------------------------------------------|
| 477.1452 | 477.1459   | -0.7 | -1.5 | 19.5 | 431.2 | n/a  | n/a      | C <sub>30</sub> H <sub>25</sub> N <sub>2</sub> S <sub>2</sub> |

**4q.** HRMS (ESI) calcd for C<sub>34</sub>H<sub>37</sub>N<sub>2</sub><sup>+</sup> *m/z* 473.2957 [M+H]<sup>+</sup>, Found 473.2951.

# Elemental Composition Report

## Single Mass Analysis

Tolerance = 5.0 mDa / DBE: min = -1.5, max = 50.0

Element prediction: Off

Number of isotope peaks used for i-FIT = 3

Monoisotopic Mass, Even Electron Ions

3189 formula(e) evaluated with 1 results within limits (up to 50 closest results for each mass)

Elements Used:

C: 34-34 H: 37-37 N: 0-30 O: 0-100 Na: 0-8

32

241102-2-T-474 21 (0.147)

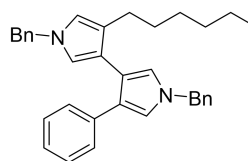

**4q**

Page 1

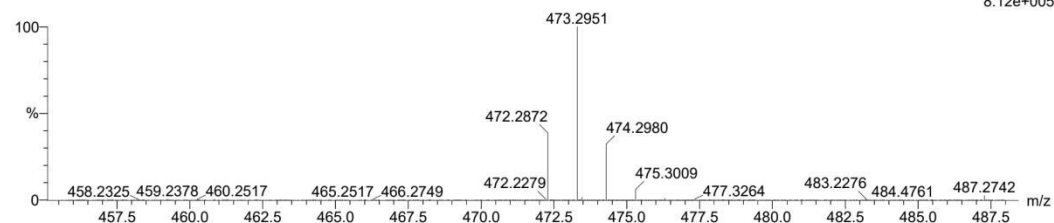

1: TOF MS ES+  
8.12e+005

Minimum: -1.5  
Maximum: 5.0 10.0 50.0

| Mass     | Calc. Mass | mDa  | PPM  | DBE  | i-FIT | Norm | Conf (%) | Formula                                        |
|----------|------------|------|------|------|-------|------|----------|------------------------------------------------|
| 473.2951 | 473.2957   | -0.6 | -1.3 | 17.5 | 821.3 | n/a  | n/a      | C <sub>34</sub> H <sub>37</sub> N <sub>2</sub> |

**4r. HRMS (ESI) calcd for C<sub>34</sub>H<sub>35</sub>N<sub>2</sub><sup>+</sup> *m/z* 471.2800 [M+H]<sup>+</sup>, Found 471.2792.**

#### Elemental Composition Report

##### Single Mass Analysis

Tolerance = 5.0 mDa / DBE: min = -1.5, max = 50.0

Element prediction: Off

Number of isotope peaks used for i-FIT = 3

Monoisotopic Mass, Even Electron Ions

3161 formula(e) evaluated with 1 results within limits (up to 50 closest results for each mass)

Elements Used:

C: 34-34 H: 35-35 N: 0-30 O: 0-100 Na: 0-8

32

241102-2-T-473 31 (0.219)

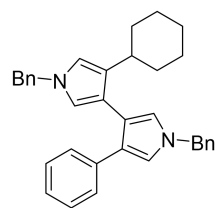

**4r**

Page 1

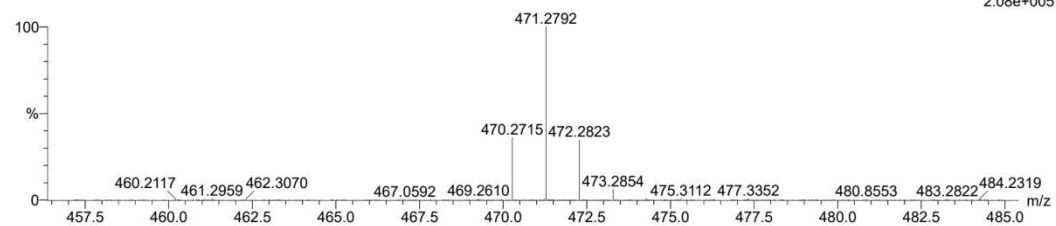

1: TOF MS ES+  
2.08e+005

Minimum: -1.5  
Maximum: 5.0 10.0 50.0

| Mass     | Calc. Mass | mDa  | PPM  | DBE  | i-FIT | Norm | Conf (%) | Formula                                        |
|----------|------------|------|------|------|-------|------|----------|------------------------------------------------|
| 471.2792 | 471.2800   | -0.8 | -1.7 | 18.5 | 529.4 | n/a  | n/a      | C <sub>34</sub> H <sub>35</sub> N <sub>2</sub> |

**4s. HRMS (ESI) calcd for C<sub>28</sub>H<sub>25</sub>N<sub>2</sub><sup>+</sup> m/z 389.2018 [M+H]<sup>+</sup>, Found 389.2015.**

#### Elemental Composition Report

##### Single Mass Analysis

Tolerance = 5.0 mDa / DBE: min = -1.5, max = 50.0

Element prediction: Off

Number of isotope peaks used for i-FIT = 3

Monoisotopic Mass, Even Electron Ions

353 formula(e) evaluated with 1 results within limits (up to 50 best isotopic matches for each mass)

Elements Used:

C: 28-28 H: 25-25 N: 0-100 O: 0-100

31

250103-3-T-494-2 21 (0.077)

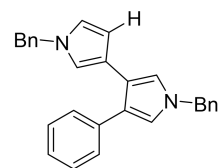

**4s**

Page 1

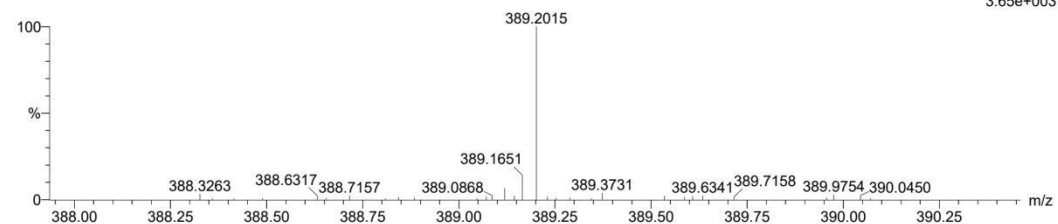

Minimum:  
Maximum:

|          |            |      |      |      |       |      |         |                                                |
|----------|------------|------|------|------|-------|------|---------|------------------------------------------------|
| Mass     | Calc. Mass | mDa  | PPM  | DBE  | i-FIT | Norm | Conf(%) | Formula                                        |
| 389.2015 | 389.2018   | -0.3 | -0.8 | 17.5 | 138.4 | n/a  | n/a     | C <sub>28</sub> H <sub>25</sub> N <sub>2</sub> |



**4t. HRMS (ESI) calcd for C<sub>34</sub>H<sub>40</sub>N<sub>2</sub>Na<sup>+</sup> m/z 499.3084 [M+H]<sup>+</sup>, Found 499.3092.**

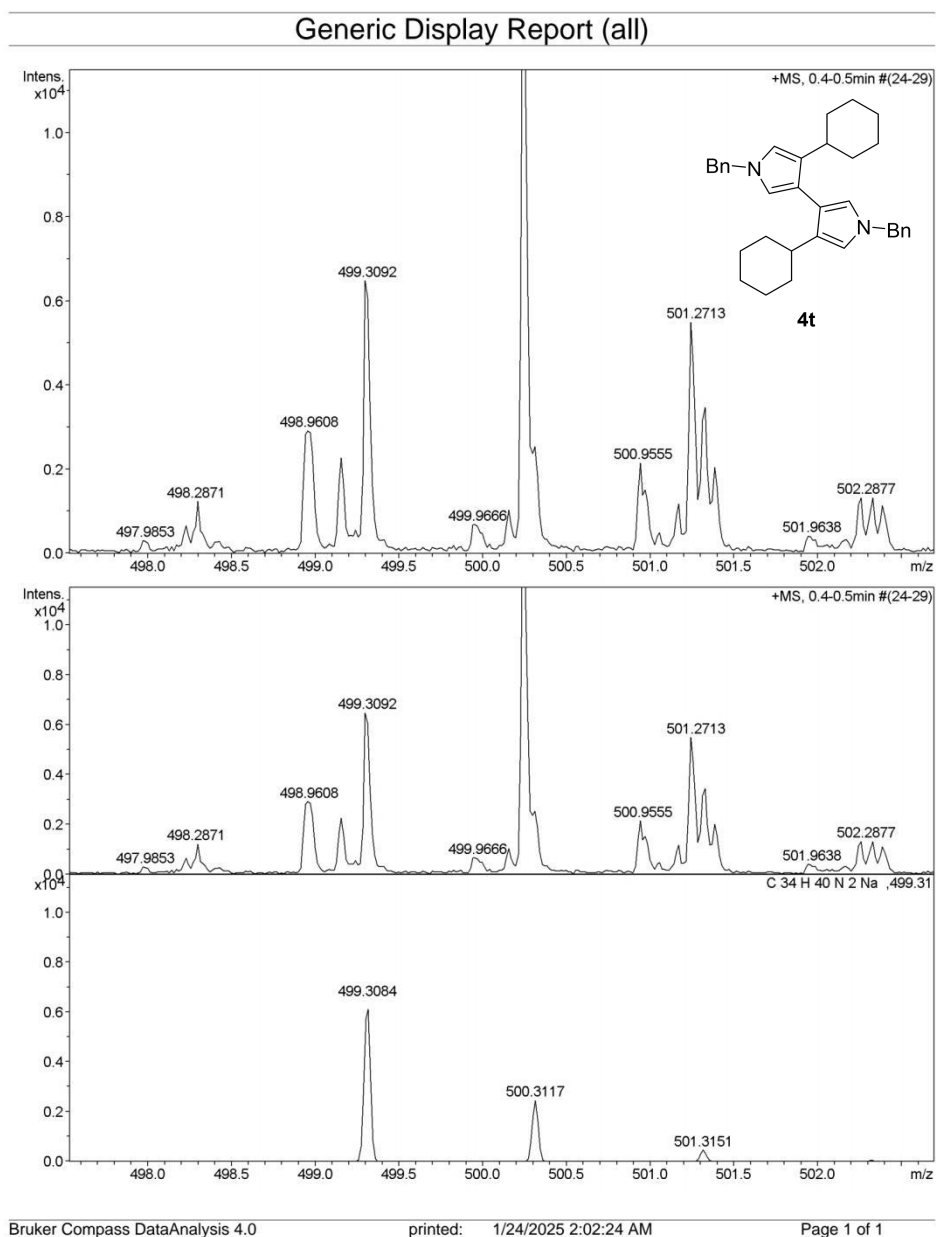

5. HRMS (ESI) calcd for C<sub>38</sub>H<sub>33</sub>N<sub>2</sub>O<sub>2</sub><sup>+</sup> m/z 549.2542 [M+H]<sup>+</sup>, Found 549.2545.

Elemental Composition Report

Single Mass Analysis

Tolerance = 5.0 mDa / DBE: min = -1.5, max = 50.0

Element prediction: Off

Number of isotope peaks used for i-FIT = 3

Monoisotopic Mass, Even Electron Ions

682 formula(e) evaluated with 1 results within limits (up to 50 best isotopic matches for each mass)

Elements Used:

C: 38-38 H: 33-33 N: 0-100 O: 0-100

31

250103-3-T-496 41 (0.115)

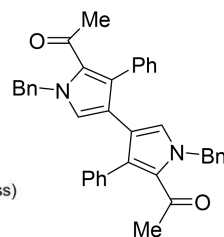

Page 1

5

1: TOF MS ES+  
8.53e+004

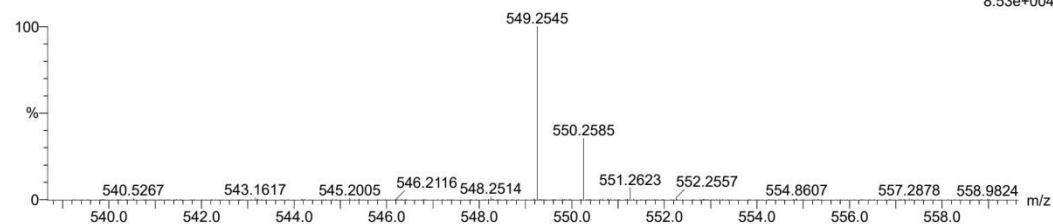

Minimum: -1.5  
Maximum: 5.0 10.0 50.0

| Mass     | Calc. Mass | mDa | PPM | DBE  | i-FIT | Norm | Conf(%) | Formula                                                       |
|----------|------------|-----|-----|------|-------|------|---------|---------------------------------------------------------------|
| 549.2545 | 549.2542   | 0.3 | 0.5 | 23.5 | 391.9 | n/a  | n/a     | C <sub>38</sub> H <sub>33</sub> N <sub>2</sub> O <sub>2</sub> |

**6a.** HRMS (ESI) calcd for C<sub>54</sub>H<sub>41</sub>N<sub>2</sub><sup>+</sup> *m/z* 717.3270 [M+H]<sup>+</sup>, Found 717.3273.

# Elemental Composition Report

## Single Mass Analysis

Tolerance = 5.0 mDa / DBE: min = -1.5, max = 50.0

Element prediction: Off

Number of isotope peaks used for i-FIT = 3

Monoisotopic Mass, Even Electron Ions

7352 formula(e) evaluated with 1 results within limits (up to 50 closest results for each mass)

Elements Used:

C: 54-54 H: 41-41 N: 0-30 O: 0-100 Na: 0-8

32

241102-2-T-468 39 (0.261)

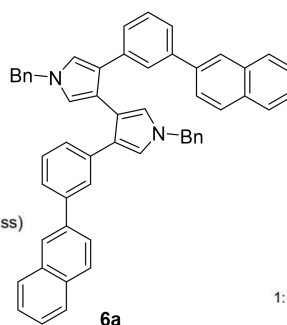

Page 1

1: TOF MS ES+  
5.84e+005

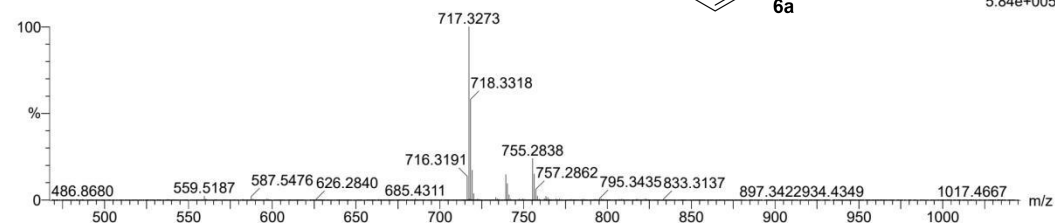

Minimum:  
Maximum:

5.0 10.0 -1.5  
0.4 50.0

| Mass     | Calc. Mass | mDa | PPM | DBE  | i-FIT | Norm | Conf (%) | Formula                                        |
|----------|------------|-----|-----|------|-------|------|----------|------------------------------------------------|
| 717.3273 | 717.3270   | 0.3 | 0.4 | 35.5 | 609.5 | n/a  | n/a      | C <sub>54</sub> H <sub>41</sub> N <sub>2</sub> |

**6b. HRMS (ESI) calcd for C<sub>62</sub>H<sub>45</sub>N<sub>2</sub><sup>+</sup> *m/z* 817.3583 [M+H]<sup>+</sup>, Found 817.3574.**

# Elemental Composition Report

## Single Mass Analysis

Tolerance = 5.0 mDa / DBE: min = -1.5, max = 50.0

Element prediction: Off

Number of isotope peaks used for i-FIT = 3

Monoisotopic Mass, Even Electron Ions

9091 formula(e) evaluated with 1 results within limits (up to 50 closest results for each mass)

Elements Used:

C: 62-62 H: 45-45 N: 0-30 O: 0-100 Na: 0-8

32

241102-2-T-451-2 61 (0.396)

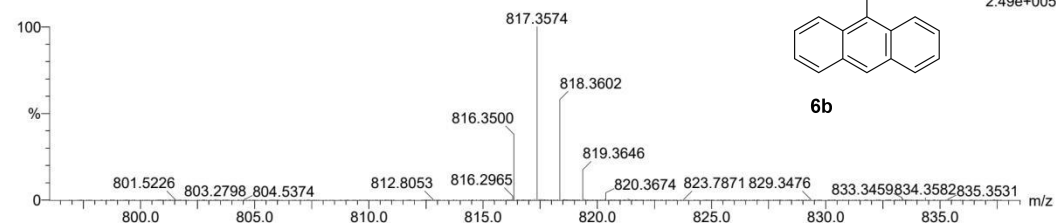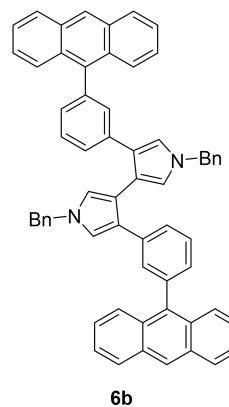

Minimum: -1.5  
Maximum: 5.0 10.0 50.0

| Mass     | Calc. Mass | mDa  | PPM  | DBE  | i-FIT | Norm | Conf (%) | Formula                                        |
|----------|------------|------|------|------|-------|------|----------|------------------------------------------------|
| 817.3574 | 817.3583   | -0.9 | -1.1 | 41.5 | 483.1 | n/a  | n/a      | C <sub>62</sub> H <sub>45</sub> N <sub>2</sub> |

7. HRMS (ESI) calcd for  $C_{70}H_{68}N_2O_2Na^+$   $m/z$  991.5178  $[M+Na]^+$ , Found 991.5179.

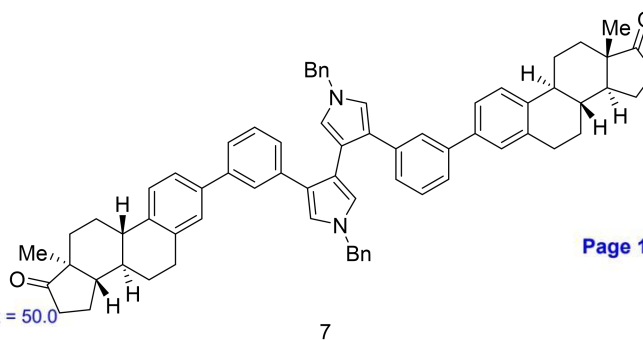

### Elemental Composition Report

#### Single Mass Analysis

Tolerance = 5.0 mDa / DBE: min = -1.5, max = 50.0

Element prediction: Off

Number of isotope peaks used for i-FIT = 3

Monoisotopic Mass, Even Electron Ions

11964 formula(e) evaluated with 1 results within limits (up to 50 closest results for each mass)

Elements Used:

C: 70-70 H: 68-68 N: 0-30 O: 0-100 Na: 0-8

32

241102-2-T-465 60 (0.371)

1: TOF MS ES+  
3.54e+004

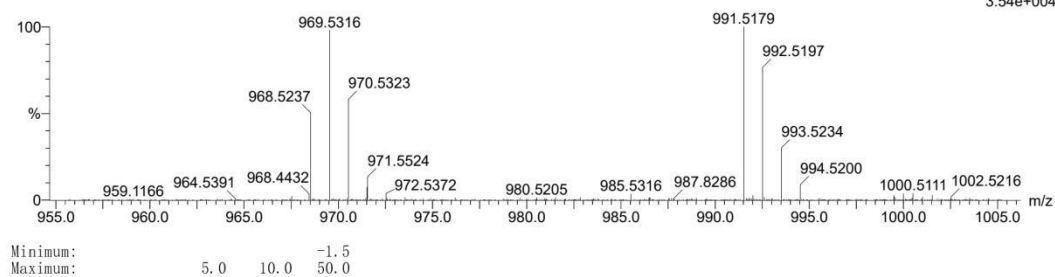

Minimum: -1.5  
Maximum: 50.0

| Mass     | Calc. Mass | mDa | PPM | DBE  | i-FIT | Norm | Conf(%) | Formula          |
|----------|------------|-----|-----|------|-------|------|---------|------------------|
| 991.5179 | 991.5178   | 0.1 | 0.1 | 37.5 | 311.4 | n/a  | n/a     | C70 H68 N2 O2 Na |

**8. HRMS (ESI) calcd for  $C_{74}H_{69}N_2O_8^+$   $m/z$  1113.5054  $[M+H]^+$ , Found 1113.5047.**

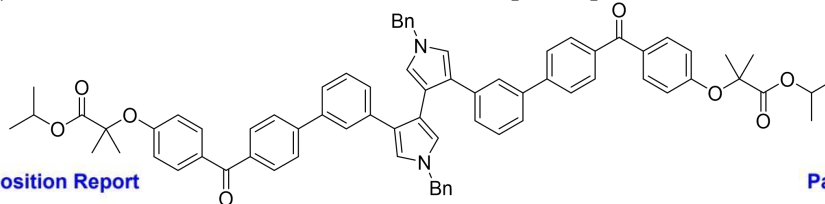

**Elemental Composition Report**

Page 1

**Single Mass Analysis**

Tolerance = 5.0 mDa / DBE: min = -1.5, max = 50.0

Element prediction: Off

Number of isotope peaks used for i-FIT = 3

8

Monoisotopic Mass, Even Electron Ions

13744 formula(e) evaluated with 1 results within limits (up to 50 closest results for each mass)

Elements Used:

C: 74-74 H: 69-69 N: 0-30 O: 0-100 Na: 0-8

32

241102-2-T-466 39 (0.261)

1: TOF MS ES+  
1.98e+005

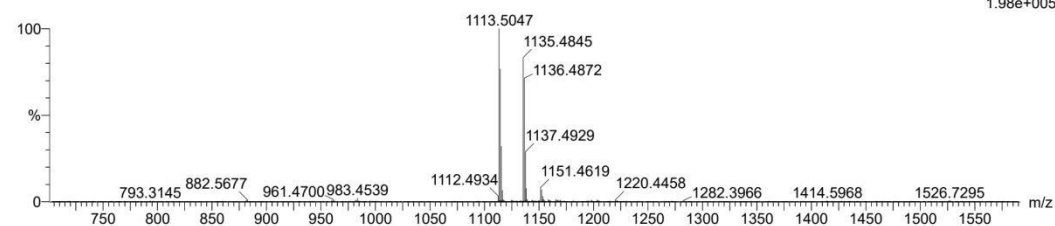

Minimum: -1.5  
Maximum: 5.0 10.0 50.0

| Mass      | Calc. Mass | mDa  | PPM  | DBE  | i-FIT | Norm | Conf (%) | Formula                                                       |
|-----------|------------|------|------|------|-------|------|----------|---------------------------------------------------------------|
| 1113.5047 | 1113.5054  | -0.7 | -0.6 | 41.5 | 462.7 | n/a  | n/a      | C <sub>74</sub> H <sub>69</sub> N <sub>2</sub> O <sub>8</sub> |

9. HRMS (ESI) calcd for  $C_{88}H_{116}N_2O_2Na^+$   $m/z$  1255.8935  $[M+Na]^+$ , Found 1255.8921.

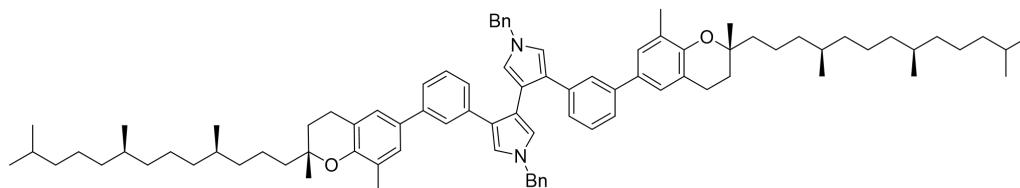

9

# Elemental Composition Report

Page 1

## Single Mass Analysis

Tolerance = 5.0 mDa / DBE: min = -1.5, max = 50.0

Element prediction: Off

Number of isotope peaks used for i-FIT = 3

Monoisotopic Mass, Even Electron Ions

16385 formula(e) evaluated with 1 results within limits (up to 50 closest results for each mass)

Elements Used:

C: 88-88 H: 116-116 N: 0-30 O: 0-100 Na: 0-8

32

241102-2-T-464 32 (0.224)

1: TOF MS ES+  
2.29e+002

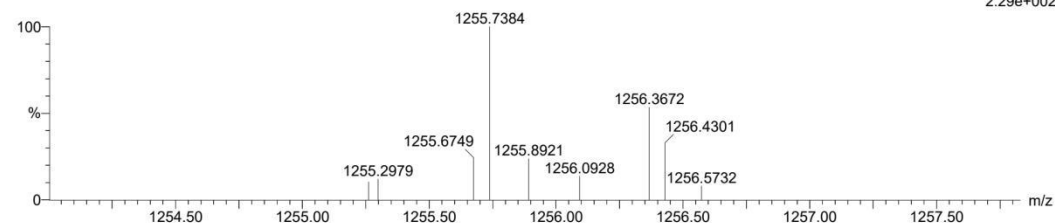

Minimum: -1.5  
Maximum: 50.0

| Mass      | Calc. Mass | mDa  | PPM  | DBE  | i-FIT | Norm | Conf(%) | Formula                                                           |
|-----------|------------|------|------|------|-------|------|---------|-------------------------------------------------------------------|
| 1255.8921 | 1255.8935  | -1.4 | -1.1 | 31.5 | 50.5  | n/a  | n/a     | C <sub>88</sub> H <sub>116</sub> N <sub>2</sub> O <sub>2</sub> Na |

**10. HRMS (ESI) calcd for C<sub>25</sub>H<sub>22</sub>N<sup>+</sup>  $m/z$  336.1752 [M+H]<sup>+</sup>, Found 336.1754.**

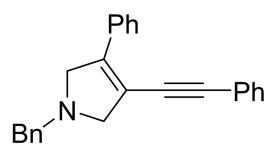

**10**

# **Elemental Composition Report**

**Page 1**

## **Single Mass Analysis**

Tolerance = 5.0 mDa / DBE: min = -1.5, max = 50.0

Element prediction: Off

Number of isotope peaks used for i-FIT = 3

Monoisotopic Mass, Even Electron Ions

1414 formula(e) evaluated with 1 results within limits (up to 50 closest results for each mass)

Elements Used:

C: 25-25 H: 22-22 N: 0-30 O: 0-100 Na: 0-8

32

241102-2-T-452 42 (0.277)

1: TOF MS ES+  
1.17e+006

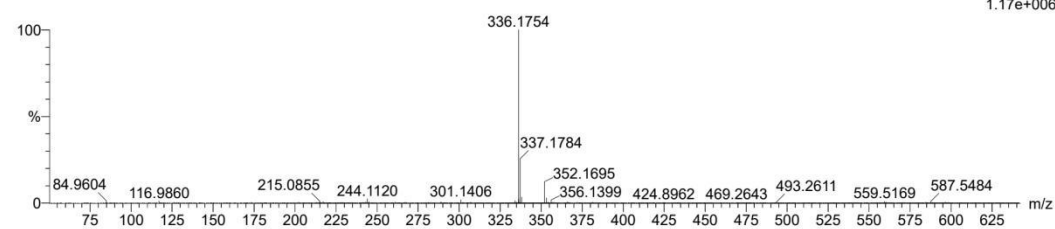

Minimum: -1.5  
Maximum: 5.0 10.0 50.0

| Mass     | Calc. Mass | mDa | PPM | DBE  | i-FIT | Norm | Conf (%) | Formula                           |
|----------|------------|-----|-----|------|-------|------|----------|-----------------------------------|
| 336.1754 | 336.1752   | 0.2 | 0.6 | 15.5 | 822.8 | n/a  | n/a      | C <sub>25</sub> H <sub>22</sub> N |



# 11. HRMS (ESI) calcd for C<sub>34</sub>H<sub>31</sub>N<sub>2</sub><sup>+</sup> *m/z* 467.2487 [M+H]<sup>+</sup>, Found 467.2491.

## Elemental Composition Report

### Single Mass Analysis

Tolerance = 5.0 mDa / DBE: min = -1.5, max = 50.0

Element prediction: Off

Number of isotope peaks used for i-FIT = 3

Monoisotopic Mass, Even Electron Ions

3102 formula(e) evaluated with 1 results within limits (up to 50 closest results for each mass)

Elements Used:

C: 34-34 H: 31-31 N: 0-30 O: 0-100 Na: 0-8

32

241102-2-T-453 33 (0.229)

1: TOF MS ES+  
1.77e+006

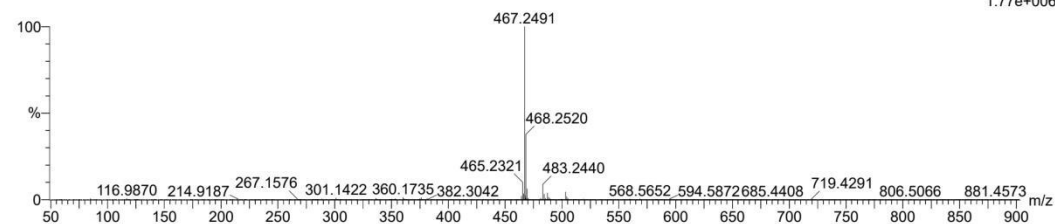

Minimum:  
Maximum:

| Mass     | Calc. Mass | mDa | PPM | DBE  | i-FIT | Norm | Conf(%) | Formula                                        |
|----------|------------|-----|-----|------|-------|------|---------|------------------------------------------------|
| 467.2491 | 467.2487   | 0.4 | 0.9 | 20.5 | 764.6 | n/a  | n/a     | C <sub>34</sub> H <sub>31</sub> N <sub>2</sub> |
